# Supplementary material for: Genetic Insights into the Rheological Phenotype of Candida albicans Biofilms
Source: Research Square preprint supplement (doi:10.21203/rs.3.rs-8555167/v1), 2026-01-20
Supplement: Supplementary file 1 [file 0ca6cdbe5c0587401c131882.xlsx]

## Sheet: Fig 1a_Rheology Frequency
𝜔 [rad/s]	G' BWP17 [Pa]					G'' BWP17					G' BWP17 WT [Pa]					G'' BWP17 WT					G' BWP17 WT					G" BWP17 WT					G' pmr1∆/∆					G" pmr1∆/∆					G' alg11∆/∆					G" alg11∆/∆
0.1	20217.9	26103.2	24580.3	17917.5	19974.1	2708.48	3618.2	1578.41	2157.54	3440.51	12953	17599	14043	11934.4	12876.4	1653.43	1924.04	1671.61	1200.13	1320.81	10559.3	17746.8	9763.51	20993.2	12977.2	931.88	2047.45	1774.74	2721.77	1757.08	45459.8	44589.1	56961.3			5174.38	24016.5	15523.8			43319.9	46807.1	75458.9			17050.4	16398.8	18483.9
0.112202	20820.1	26603.8	23433.5	18515.8	20850.2	2549.95	2978.8	4457.33	2397.17	2660.65	13075.7	17760.4	14255.8	12050.4	13748.3	1450.01	1851.62	1597.71	1091.08	1342.75	10814.8	18036.5	9713.2	21736.6	13337.5	1416.96	2160.39	1491.76	2143.89	1643.99	46503.8	57544.8	65702.8			4722.2	15818.8	12215.1			56095.7	54390	80979.6			18937.7	15926.9	13954.2
0.125892	21026.8	26635	25942.8	19049.5	20540	2377.63	2614.45	6041.99	2570.79	2034.01	13156.7	17868.5	14336.6	11716.1	13583.1	1252.85	1739.31	1541.48	791.113	1350.4	11235.5	18273.2	9703.55	21369.9	13531.8	1456.55	2182.76	924.726	1802.4	1529.34	46457.9	65281.3	69610.6			4186.08	11161.4	11479.5			61017.8	57706.3	81102.3			16740.7	15542.1	12443.8
0.141254	21483.5	26568.1	27787	19362.7	20950.7	2305.64	2995.61	4447.03	2080.99	3256.54	13115.6	18128.3	14542.5	11955.4	13889.1	1285.84	1716.47	1456.73	1240.14	1469.17	11512.2	19264.8	9891.99	21215.2	13738.4	1294.15	2551.42	1156.25	2043.33	1385.78	47009.7	66889.7	72623.9			3898.47	11187.6	9848.87			65768.3	60428	81776.6			16040.1	14509.1	12684.8
0.15849	21647.2	27090.5	27025.2	19673.3	21121.6	2218.23	3220.04	3254.33	1954	2823.44	13175.8	18227.3	14692.3	12240	13879.4	1229.94	1694.34	1354.41	1052.49	1306.91	11497	18772.6	10026.1	21745.3	13817.3	1087.71	1787.89	1225.48	2097.86	1161.06	47266.9	69618.4	74764.8			4085.03	11280.5	8779.82			71776.9	62810.1	82966.8			14981.5	13734.6	13188.1
0.177828	21917.4	27580.7	26455.1	19770.5	21508.7	2371.14	2862.23	4888.62	2300.29	2551.25	13461.1	18327.7	14795	12340.7	14102.6	1194.65	1589.05	1367.35	1071.36	1160.56	11426.5	18782.8	10134	22119.2	13773.4	1258.65	1671.73	805.427	2008.9	1364.03	47885.3	71514.9	75869.4			3919.26	10102.3	9001.46			75270.6	66209.9	85631.9			12631.9	13814.3	11827
0.199526	22214.5	27473.2	28438.6	20214.7	21323.9	2150.54	2703.91	4748.71	2283.81	2382.05	13468.6	18456.4	14957.5	12387.1	14156.9	1202.06	1576.8	1312.83	1033.62	1105.7	11798.9	19174.6	10095.3	22233.9	13928	1292.04	1946.17	796.9	1812.96	1281.84	48028.7	72369	77180.8			3764.38	9949.08	8196.1			75751.6	67828.2	84867.3			11864.9	13885.4	11528.7
0.223872	22472.5	27880.4	28242.9	20437.7	21624.1	2153.85	2985.97	3856.86	2266.23	2618.48	13441	18534.5	15098.5	12487.3	14273.6	1154.18	1544.45	1373.04	1079.2	1189.07	11779.4	19247.7	9955.84	22261.5	14256.4	882.245	1790.02	1122.38	1974.83	1336.08	48279.4	73273.3	78198.4			3964.98	9502.77	7404.97			77265.4	69837.9	85939.4			12114.4	12995.6	11954.4
0.251189	22660	28167	28617.3	20612.1	22138.6	2201.32	2661.54	4604.66	2368.73	2272.04	13651.9	18682.6	15184.5	12677.3	14374.3	1163.43	1480.76	1332.39	909.638	1195.9	11820.9	19406.1	10083.5	22441	14191.1	1191.65	1796.33	703.996	1915.99	1299.08	48689.3	73768.4	78868.5			3537.08	10153.5	7642.37			78728.3	71287	86916.7			10985.3	12879.5	10969.5
0.281839	22976.3	28207.8	29436.2	20936.4	22041.4	2260.13	2798.02	3873.18	2314.1	2536.79	13778.7	18783.4	15263	12654.9	14408.6	1038.24	1482.3	1277.5	990.488	1203.44	12336	19641.6	10086.9	22660.8	14333.5	869.858	1616.84	991.726	1887.57	1363.76	48979.6	74798.9	80464.9			3464.6	8179.96	7084.74			79559.6	74647.3	87745.2			11137.2	12186.5	11257.1
0.316228	23169	28623.6	29702.3	21129.7	22432.2	2210.65	2587.54	4426.77	2243.15	2287.18	13828.4	18874.8	15354.6	12633.3	14494.6	1190.04	1440.41	1254.83	979.687	1100.55	11939.2	19545.6	10567.3	22820.3	14351.1	1124.5	1577.49	699.624	1816.36	1374.9	49202.5	76474.2	80724.2			3421.59	7920.78	7402.09			80802.1	76125.9	88627.9			10360.7	12103.5	10585.9
0.354813	23456.4	28779.4	30009.4	21468.5	22645.3	2177.94	2779.66	3808.24	2164.82	2470.54	13909.9	18972.4	15468.1	12895.6	14606.3	1115.2	1456.67	1267.86	1095.26	1121.27	12021.7	19647.6	10303.8	22927	14441.5	992.762	1720.28	678.463	1827.43	1206.97	49534.2	76611.9	82029.1			3509.09	8010.8	7018.62			81551	77283.9	89343.8			10775.9	12085.2	10599.1
0.398107	23676.4	28872.7	30678.8	21642.6	22665.4	2182.65	2522.87	4157.09	1985.85	2275.43	13959.2	19057.8	15553.2	12773.5	14632.2	1121.23	1427.35	1246.04	950.589	1089.7	12195.2	19768.2	10503.9	22974.4	14571.8	1053.18	1635.24	750.062	1749.05	1268.95	49626.4	77940.1	81754.9			3416.59	9711.76	6223.61			82308.2	78604.1	89998.8			10168.7	11235	10346.4
0.446684	23876.3	29245.7	30729	22136.6	23023.8	2052.68	2489.77	4108.36	1875.88	2201.36	14054.7	19183.8	15599.7	12859.8	14707	1097.33	1410.64	1261.45	922.467	1039.45	12202	19902.9	10581.3	23090.2	14687.9	1033	1609.49	772.429	1723.28	1216.32	50052.2	77432.8	82769.7			3496.62	9298.5	6271.44			83417.9	80184.2	90806.7			9913.87	11382.1	9854.38
0.501188	24065	29424.1	31038.1	22251	23274.5	1960.05	2507.08	3944.84	2090.47	2270.46	14130.4	19243.7	15726.1	13010.2	14771.4	1125.5	1443.89	1226.45	917.545	1099.62	12259.6	19960.4	10484.6	23269.2	14738.7	1004.97	1714.06	1164.57	1768.89	1236.8	50335.3	77937.3	83324.9			3393.51	8366.22	6149.16			84189.4	80918.9	91523.1			10137.1	10954.5	9888.14
0.562342	24253.9	29623.8	31347.9	22383.9	23462.8	2020.12	2523.67	3880.03	2043.25	2183.42	14213.3	19364.8	15855	13014.9	14658.2	1111.02	1428.22	1209.48	932.942	1354.32	12347.7	20177.8	10390.7	23359.2	14750.7	1003.26	1626.13	865.021	1700.31	1221.51	50579.3	77764.1	83750.3			3379.33	8579.71	6272.3			85119.8	81957.4	91978			9932.23	10978.2	9812.65
0.630957	24526.1	29806.6	31776.1	22449.1	23676.9	2061.61	2456.86	3827.72	2324.54	2155.96	14212.1	19473	15873.7	13112.7	14945	1166.27	1379.89	1198.55	810.602	1058.28	12395.7	20395.4	10669.7	23489.7	14746.2	1023.74	1663.2	557.086	1745.2	1104.45	50847.5	76853.1	84408.7			3410.92	9981.11	6325.8			85651.9	83311.6	92982.4			9628.33	10685	9243.91
0.707945	24707.8	29917.3	32217.7	22760.2	23771.8	1995.83	2397.23	3874	2071.97	2113.7	14386	19527	15980	13134.8	15076.4	1165.05	1384.03	1257.5	969.321	1056.2	12492.6	20375.8	10616.4	23635.8	14931	994.144	1723.04	755.523	1697.29	1193.06	51110.5	74130.3	84858.1			3303.5	10471.5	6257.82			86340.2	84445.3	93492.6			9314.77	10136.9	9267.73
0.794327	24862.4	30054.2	32692.2	23062	23873	1931.77	2423.18	3688.46	1953.29	2108.72	14479	19587.3	16110.6	13157.6	15102.1	1102.36	1416.94	1206.84	952.064	1071.58	12591.5	20587.2	10755.4	23773.9	14926.3	950.707	1657.42	964.224	1707.5	1220.96	51339.3	77061.3	85165.3			3309.93	9357.62	6506.14			87105.6	85310.8	94378.7			9610.56	10042.2	9130.7
0.891251	25090.6	30280.3	32815.5	23222.1	24199.4	1950.64	2373.68	3656.55	2020.29	2098.26	14505.9	19745.8	16151.7	13295.7	15206.8	1144.07	1385.57	1221.78	923.694	1065.48	12627.5	20581.4	10879.9	23859.1	15104.1	979.97	1626.06	746.121	1720.26	1198.22	51586.4	78029.9	85924.5			3331.92	9772.81	6267.96			87969.8	86543.5	94871.3			9426.21	9897.41	9054.15
1	25260.3	30408.3	33241.7	23408.2	24245.9	2024.21	2341.67	3559.2	1971.02	2091.42	14605	19815.7	16260.5	13344	15275	1106.43	1404.19	1214.28	932.888	1049.65	12693.1	20739	10974.3	24019.5	15231	965.654	1649.54	811.097	1704.97	1209.51	51900.8	78962.9	86489.4			3353.01	10195.2	6147.73			88420.5	87036.1	95290.7			9336.03	9850.2	9067.81
1.12201	25452.6	30580.6	33615.6	23639.2	24396.3	1939.31	2336.58	3485.58	1960.8	2099.72	14697.9	19892.4	16332.4	13420.1	15325	1117.33	1398.93	1210.92	888.826	1097.49	12773.5	20842.1	10904.4	24104.6	15277.9	973.499	1575.84	945.542	1696.17	1163.18	52156.5	80367.2	87036.8			3257.99	8462.96	6086.96			89116.6	87992.1	95869.1			9441.28	9456.75	8855.5
1.25892	25654.7	30784	33891.2	23851.8	24600.9	1933.95	2349.96	3453.55	1965.39	2073.64	14764.5	20002.6	16433.3	13559.5	15425.6	1105.16	1396.31	1230.04	971.742	1080.28	12832.2	20925.7	11043.2	24216.1	15349.7	980.277	1585	783.967	1708.5	1171.16	52400.2	81964.1	87674.4			3297.28	8164.87	6044.05			89769.8	88519.9	96275.4			9528.29	9481.2	9042.95
1.41254	25861.3	30967.9	34161.8	24034.5	24830.9	1942.68	2290.13	3478.35	1968.56	2032.15	14841.7	20107.2	16509.4	13515.7	15489.1	1140.06	1388.5	1239.86	929.909	1087.54	12898.1	21082.5	11038.3	24359.8	15419.3	995.584	1554.05	786.282	1699.5	1176.58	52623	83021.1	87732.8			3284.35	7637.26	6071.53			90336.4	89765.8	96803.1			9515.13	8870.42	8769.05
1.5849	26059	31149.7	34501.2	24220.7	24958.1	1947.87	2332.46	3432.81	1953.01	2070.5	14919.5	20192.7	16578.1	13580.3	15585.4	1137.27	1401.84	1227.35	939.521	1077.58	12984.6	21197.1	11112.8	24473.3	15501.6	975.507	1585.71	787.714	1722.24	1168.83	52883.7	83488.4	88396.7			3323.26	7825.2	5783.26			90993.6	90727.9	97469.7			9494.76	9041.71	8812.29
1.77828	26288.2	31316.4	34830.6	24487	25140.4	1940.77	2307.51	3370.09	2005.44	2068.25	14995.3	20281.4	16686.7	13664.8	15646.4	1139.32	1394.91	1271.24	947.393	1078.7	13029.3	21274.3	11160.7	24603.1	15561	989.359	1594.73	864.557	1733.22	1167.69	53083.1	84562	89045.6			3348.14	7557.37	5868.23			91878.9	91571.7	98031.9			9591.11	9108.28	8722.39
1.99526	26439.5	31490.7	35113.4	24712.7	25304.9	1946.31	2287.39	3431.19	2033.88	2037.96	15072.8	20358.3	16789.6	13709.3	15646.4	1147.71	1393.75	1259.55	951.094	1174.3	13097.5	21382.1	11234.7	24717	15664.9	997.06	1554	870.893	1734.78	1189.44	53341.2	85132.6	89669.1			3322.87	7569.96	5936.17			92586.1	92403.5	98689.8			9346.88	9124.87	8688.68
2.23872	26628.3	31677.8	35460.2	24920.6	25491.9	1931.4	2312.57	3352.89	2000.69	2044.32	15155.2	20451.9	16865.6	13785	15787.5	1152.19	1413.76	1278.44	965.053	1087.47	13162.4	21513.1	11289.9	24832.9	15739.5	993.122	1609.86	821.667	1744.13	1185.23	53582.7	85786.4	90198.8			3330.73	7586.46	5958.64			93362.8	93149.8	99282.7			9316.05	9027.86	8687.8
2.51189	26849.3	31853.9	35723.5	25172.4	25639.4	1947.17	2301.87	3378.87	2022.84	2040.81	15233.1	20555.5	16957.4	13839.9	15856.1	1161.63	1421.95	1292.32	947.238	1085.3	13230.5	21605.1	11298.1	24967.5	15823	1009.06	1592.8	868.38	1748.72	1197.21	53877.9	86378.2	90769.2			3327.64	7625.37	6006.19			94108.9	93740	99774.6			9188.64	9936.23	8670.33
2.81838	27048.8	32028.7	36046.7	25361.9	25812.2	1961.34	2329.82	3320.61	2013.2	2052.47	15311.1	20658.7	17051.1	13903.5	15939.3	1167.14	1422.64	1298.85	962.073	1083.88	13290.8	21707	11355.1	25099.7	15903.8	1015.32	1623.76	844.776	1763.51	1206.58	54092.9	86936.2	91343.4			3350.98	7683.26	6045.06			94958.4	95075	100373			9191.48	8958.21	8645.6
3.16228	27205.6	32191.8	36331.1	25576.1	25969.2	1950.73	2309.08	3523.62	1995.11	2035.99	15396.7	20752.7	17144	13970	16013.4	1178.81	1433.58	1314.39	968.5	1097.74	13355.5	21811.7	11443.8	25204.6	15985.4	1018.27	1634.49	908.454	1781.65	1190.82	54356.1	87570.3	91873.1			3367.23	7593.42	6134.61			95559.3	95875.7	100851			9113.2	8938.12	8689.7
3.54815	27399.2	32343.3	36612.9	25795.2	26137.2	1978.31	2332.87	3369.45	2022.13	2050.73	15467.4	20844.8	17243.3	14035.4	16095.4	1191.06	1442.11	1333.28	980.384	1114.07	13432	21936.2	11473.9	25326.2	16070.9	1030.64	1644.88	853.912	1805.05	1245.39	54615.2	87377.7	92339.2			3372.65	7593.11	6211			96323.6	96443.6	101542			9177.33	8972.85	8678.38
3.98108	27600.5	32522.5	36952.4	26018.3	26299.2	1996.2	2350.34	3339.06	2031.75	2069.93	15550.7	20948.6	17332.6	14099.5	16166.5	1198.86	1455.35	1345.71	995.693	1125.29	13503.3	22038.8	11533.3	25445.1	16158.3	1047.49	1640.75	881.075	1825.07	1222.81	54897.1	89040.4	92930			3406.07	7288	6285.28			97143.5	97177.6	102118			9196.69	8989.46	8655.44
4.46684	27822.5	32704.8	37254.7	26207.6	26467.8	2018.26	2364.48	3367.35	2037.67	2072.66	15631.6	21039.1	17421.8	14177.3	16244.9	1211.28	1469.85	1357.33	1002.05	1128.31	13567.9	22156.8	11608.7	25578.6	16229.3	1061.36	1674.58	931.132	1845.17	1266.56	55151.8	89662.1	93183.5			3440.73	7423.31	6525			97793.8	97957	102794			9238.88	9030.41	8735.3
5.01186	28045.1	32881.2	37570.7	26440.1	26653.4	2052.21	2393.92	3356.01	2069.94	2089.74	15698.1	21140.4	17517.9	14234.2	16325.7	1221.79	1487.56	1378.7	1022.05	1142.71	13633	22255.8	11656.5	25701	16309.3	1071.84	1698.77	902.53	1866.81	1278.91	55446	90310.5	93835.8			3451.52	7471.89	6542.93			98603.4	98618.4	103306			9269.31	9089.37	8760.69
5.62341	28248.5	33069.4	37849.6	26637.8	26827.1	2077.86	2413.34	3387.34	2068.94	2098.41	15791.1	21237.6	17623.1	14303.7	16399.6	1243.29	1503.3	1399.82	1033.97	1155.06	13715.4	22379.3	11672	25836.8	16404	1089.07	1721.69	923.607	1887.85	1305.76	55704.2	90941.5	94299.9			3501.25	7373.37	6448.92			99311.9	99348.4	103832			9286.24	9123.84	8806.83
6.30957	28451.6	33253	38159.4	26905.2	27000	2098.98	2449.81	3387.6	2125.11	2137.71	15867.8	21335.8	17720.3	14381.2	16481.6	1256.51	1520.31	1420.7	1048.13	1167.67	13777.1	22482.7	11773.4	25973.8	16494.2	1111.19	1755.63	937.111	1920.43	1326.13	55998.9	91665.2	95070.3			3524.77	7488.2	6469.09			100115	100042	104501			9371.19	9162.67	8829.5
7.07945	28664.9	33426.9	38451.4	27137.8	27161.6	2135.97	2464.36	3420.87	2157.18	2154.28	15944.1	21430.7	17810.9	14434.1	16536.5	1277.17	1542.89	1442.78	1053.68	1190.55	13856.3	22593.6	11814.8	26096.1	16596	1134.33	1777.4	935.075	1948.12	1343.25	56279.7	92430.5	95712.4			3574.87	7565.54	6501.6			100953	100776	105048			9424.36	9218.09	8909.23
7.94327	28889.5	33605.5	38771.8	27396.1	27321.5	2168.59	2499.5	3434.69	2188.28	2167.94	16034.7	21530.7	17919.9	14503	16621.6	1298.65	1564.74	1465.38	1073.5	1201.74	13937.9	22720	11876.1	26230.8	16671.2	1155.55	1809.21	963.47	1979.24	1359.13	56584.1	92757	96334.7			3599.91	7706.84	6537.13			101770	101512	105687			9506.86	9262.34	8971.17
8.91251	29116.9	33803.8	39052.5	27556.1	27501.9	2210.31	2533.96	3461.25	2200.69	2202.14	16108.7	21631.2	18022.4	14576.6	16704.1	1314.74	1590.29	1489.1	1093.34	1222.95	14010.2	22848.3	11941.1	26359.6	16755.5	1175.51	1836.43	988.599	2012.42	1400.27	56838.9	93675.6	96898.3			3656.22	7598.56	6634.77			102682	102297	106216			9569.41	9284.71	9051.92
10	29334.9	33969.4	39368.8	27802.9	27672.6	2242.6	2588.78	3503.59	2244.26	2225.54	16192.6	21728.4	18126.5	14653	16780.3	1339.78	1616.67	1515.79	1112.4	1240.51	14088.9	22973	12002.6	26494.7	16867.6	1205.15	1873.12	994.81	2047.17	1416.28	57127.1	94298.9	97164.4			3699.95	7710.88	6892.07			103517	102955	106830			9750.67	9385.68	9120.41
