# Supplementary material for: Genetic Insights into the Rheological Phenotype of Candida albicans Biofilms
Source: Research Square preprint supplement (doi:10.21203/rs.3.rs-8555167/v1), 2026-01-20
Supplement: Supplementary file 2 [file 1230568bdbea1c057338916a.xlsx]

## Sheet: Sheet1
Cell wall - beta glucan (reported as % of WT BWP17)
BWP17	pmr1 ∆/∆	kre5 ∆/∆	alg11 ∆/∆
100	117.241	107.471	122.414
100	118.75	65.625	104.062
100	156.889	136	156.444
100	98.5149	95.5446	100
100	100	100	100
ECM - beta glucan (reported as % of WT BWP17)
BWP17	pmr1 ∆/∆	kre5 ∆/∆	alg11 ∆/∆
100	135.955	94.382	81.1798
100	131.043	104.835	87.7863
100	122.249	86.8421	77.2727
100	87.1747	44.052	102.231
100	86.4261	45.3608	101.031
100	85.7868	44.5008	98.6464
