# Supplementary material for: Genetic Insights into the Rheological Phenotype of Candida albicans Biofilms
Source: Research Square preprint supplement (doi:10.21203/rs.3.rs-8555167/v1), 2026-01-20
Supplement: Supplementary file 3 [file 18ca2dce5a428799f50ac6d6.xlsx]

## Sheet: Sheet1
G' chs8∆/∆	G' fks1∆/∆	G' phr1∆/∆	G' kre5∆/∆	G' pmr1∆/∆	G' alg11∆/∆	G' mnn9∆/∆	G' mnn22∆/∆	G' van1∆/∆
25248.7	29913.7	24868.2	56089.1	51900.8	88420.5	14330.8	17250.4	14591.6
27362	28936.1	24703.3	41619.4	78962.9	87036.1	17913	17125.3	13198.5
29071.6	27386.3	26941.2	100067	86489.4	95290.7	18592.3	22578.8	34074.1
33411.3			58976.9
			70582.2
