# Supplementary material for: Genetic Insights into the Rheological Phenotype of Candida albicans Biofilms
Source: Research Square preprint supplement (doi:10.21203/rs.3.rs-8555167/v1), 2026-01-20
Supplement: Supplementary file 4 [file 467a5dca11c7ecb48f2875a5.docx]

**Supplementary File Legends**

**Supplementary File 1. Storage and loss moduli (G′ and G′′) of wild-type, *alg11*Δ/Δ, *kre5*Δ/Δ, *pmr1*Δ/Δ, and respective complementation strains.** Data (Pa) at indicated *ω* measures (rad/s) are indicated.

**Supplementary File 2. The elastic modulus (G′) of tested deletion strains.** Elastic modulus values (Pa) are provided for the indicated strains.

**Supplementary File 3. Carbohydrate content of wild-type and mutant strains.** Total carbohydrate content (mg/L) was measured for cell wall and ECM fractions extracted from the indicated strains. Data from all biological replicates are shown. Values for mean and standard error of the mean were calculated for each strain. Data for each replicate are presented as a percentage relative to wild-type values.

**Supplementary File 4. *β*-glucan content of wild-type and mutant strains.** *β*-glucan levels were measured in the cell wall and ECM of indicated strains; data are shown for each tested biological replicate. Values are shown as a percentage relative to wild-type levels.

**Supplementary File 5. Fluconazole response of biofilms cultured from wild-type and mutant strains.** Resistance to fluconazole (at 1 mg/ml and 2 mg/ml) is reported as CFU/ml for each biofilm replicate from the indicated wild-type and mutant strains. Strain response (in CFU/ml) under control conditions in the absence of fluconazole treatment is also indicated for each strain and biological replicate. Mean values with calculated standard error of the mean are also shown for the change in CFU/ml for control-treated strains to strains treated with 2 mg/ml fluconazole.

**Supplementary File 6. Gene Ontology (GO) Biological Process term enrichment in the set of genes with differential transcript abundance in *alg11*Δ/Δ cells relative to wild type.** GO IDs are provided for each GO Biological Process term shown, along with the genes/gene IDs annotated with the GO term. Unadjusted and Benjamini and Hochberg-adjusted *p*-values are reported. Differentially abundant genes showing increased transcript levels and decreased transcript levels are identified in the “Up_Gene_ID” and “Down_Gene_ID” columns, respectively.

**Supplementary File 7. Kyoto Encyclopedia of Genes and Genomes (KEGG) term enrichment in the gene set differentially abundant in cells from *alg11*Δ/Δ biofilms relative to wild type.** The KEGG ID is shown, along with the corresponding term description, ratio of annotated genes to total in the differentially abundant gene set, ratio of annotated genes to total in the background gene set, *p-*value, and Benjamini-Hochberg-corrected *p*-value. The gene names and KEGG IDs for the genes are shown. The “Up_Gene_ID” and “Down_Gene_ID” columns identify genes that are increased and decreased in abundance, respectively, relative to wild type.

**Supplementary File 8. GO Biological Process term enrichment in the set of genes with differential transcript abundance in *kre5*Δ/Δ cells relative to wild type.** Data are presented as described above, indicating an enrichment for genes contributing to protein catabolism, aminoacylation, proteolysis, secretion, and exocytosis.

**Supplementary File 9. KEGG term enrichment in the gene set differentially abundant in cells from *kre5*Δ/Δ biofilms relative to wild type.** The data identify terms enriched in the gene set as analyzed against the KEGG database. Data are presented as described in Supplementary File 7, indicating enrichment for terms including amino acid metabolism and inositol phosphate metabolism.

**Supplementary File 10. GO Biological Process term enrichment in the set of genes with differential transcript abundance in *pmr1*Δ/Δ cells relative to wild type.** Full data sets are presented as described in Supplementary File 6, indicating a statistically significant decrease in RNA levels for genes involved in processes related to protein translation.

**Supplementary File 11. KEGG term enrichment in the gene set differentially abundant in cells from *pmr1*Δ/Δ biofilms relative to wild type.** Full data sets are presented as described in Supplementary File 7.

**Supplementary File 12. Genes in the intersection set of differentially abundant transcripts from profiling of cells in *alg11*Δ/Δ, *kre5*Δ/Δ, and *pmr1*Δ/Δ biofilms.** A listing of Gene Ontology Biological Process terms mapped to this gene set is shown, with GO IDs. GO Biological Process terms significantly enriched for this gene set are indicated separately, along with GO IDs, descriptor terms, corrected *p*-values, false discovery rates, and complete gene lists.

**Supplementary File 13. The union set of genes differentially expressed in cells of either *alg11*Δ/Δ, *kre5*Δ/Δ, or *pmr1*Δ/Δ biofilms.** GO Biological Process terms statistically enriched in the union set of differentially abundant genes from analysis of *alg11*Δ/Δ, *kre5*Δ/Δ, or *pmr1*Δ/Δ biofilms. The GO terms are indicated, along with GO IDs, corrected *p*-values, false discovery rates, and respective gene lists. The data highlight genes encoding transport proteins and mitochondrial proteins.
