# Supplementary material for: Genetic Insights into the Rheological Phenotype of Candida albicans Biofilms
Source: Research Square preprint supplement (doi:10.21203/rs.3.rs-8555167/v1), 2026-01-20
Supplement: Supplementary file 6 [file 826e5c78dd7928a28d8676d2.xlsx]

## Sheet: kre5_delvsWT.all_GOenrich
Transcriptional profiling (GO Biological Process term enrichment) -- kre5∆/∆ vs wild type
Category	GOID	Description	GeneRatio	BgRatio	pvalue	padj	geneID	geneName	Count	Up	Up_Gene_id	Down	Down_Gene_id
BP	GO:0006508	proteolysis	32/462	76/1862	0.000547235	0.151037	3635769/3646669/3640999/3645874/3639889/30515395/3638884/3636589/3638311/3646074/3639658/3646979/3646718/3641106/3640510/3643490/3641906/3642244/3643111/3644435/3636957/3639558/3641012/3637815/3639317/3647903/3635834/3642501/3647044/3643337/3643660/3636487	CAALFM_C202020WA/GPI8/PIM1/CAALFM_C602300CA/PRC3/PRE6/CAALFM_C200700WA/AFG3/PRE9/CAALFM_C600340CA/CAALFM_CR00660WA/LAP4/PUP3/CAALFM_C404550CA/SCL1/PRE2/PRE8/CYM1/PRE5/CAALFM_C110820CA/PRE10/CAALFM_C106390WA/LAP3/DAP2/UBP6/CAALFM_C600170CA/RAD23/CAALFM_CR05980WA/PRC2/DOA4/PRE3/RIM13	32	8	3639889/3639658/3646979/3641106/3644435/3641012/3647044/3636487	24	3635769/3646669/3640999/3645874/30515395/3638884/3636589/3638311/3646074/3646718/3640510/3643490/3641906/3642244/3643111/3636957/3639558/3637815/3639317/3647903/3635834/3642501/3643337/3643660
BP	GO:0055114	oxidation-reduction process	83/462	255/1862	0.00166102	0.229221	3638034/3640295/3647407/3635693/3647233/3640255/3640962/3644994/3636836/3641618/3648226/3636576/3640751/3635852/3644060/3642802/3647071/3639287/3641545/3646794/3641137/3647343/3636558/3639699/30515385/3645464/3648027/3645036/3643654/3642989/3635636/3642279/3643458/3647153/3641602/3634913/3638350/3638008/3639700/3644563/3647131/3636954/3639380/3637045/3641911/3638306/3645465/3646505/3636439/364442…	LEU2/CAALFM_C603600CA/ALD6/CAALFM_C402230CA/CAALFM_C503770CA/YMX6/DIT2/CAALFM_C400290CA/GOR1/OYE23/ALK8/CAALFM_C302070CA/ADH2/FMO1/EBP1/CAALFM_C406280CA/COX15/CAALFM_C100410CA/IFG3/CAALFM_C403350CA/CAALFM_C404720WA/YHB5/PXP2/CAALFM_CR00220WA/ERV1/CAALFM_C204480WA/IFE2/PRO3/CAALFM_C305640WA/RNR1/MDH1-1/LYS9/CAALFM_C205130WA/FET3/CAALFM_C601420CA/ZWF1/CCP1/FRP2/ALK2/GPD2/FET34/CAALFM_C702010CA/CAAL…	83	44	3640295/3647407/3635693/3647233/3640962/3644994/3636836/3648226/3636576/3640751/3635852/3642802/3639287/3641545/3646794/3636558/3639699/3645464/3643654/3635636/3642279/3643458/3634913/3638350/3639700/3636954/3639380/3637045/3641911/3645465/3644420/3645214/3638300/3646398/3644414/3642994/3636885/3643025/3643781/3639871/3643946/3639495/3644778/3634830	39	3638034/3640255/3641618/3644060/3647071/3641137/3647343/30515385/3648027/3645036/3642989/3647153/3641602/3638008/3644563/3647131/3638306/3646505/3636439/3646827/3644010/3647390/3634893/3638983/3643021/3643452/3637439/3639205/3640435/3641400/3645732/3647353/3646037/3646024/3646509/3642334/3642979/3636507/3638961
BP	GO:0051640	organelle localization	6/462	10/1862	0.0187248	0.705953	3646845/3642961/3636834/3642916/3643731/3636935	SEC15/SEC10/CAALFM_C102960CA/CAALFM_C406810CA/RCY1/SEC1	6	6	3646845/3642961/3636834/3642916/3643731/3636935	0
BP	GO:0030163	protein catabolic process	13/462	30/1862	0.0194589	0.705953	3645874/30515395/3638311/3646718/3640510/3643490/3641906/3643111/3636957/3639558/3635834/3636917/3643660	CAALFM_C602300CA/PRE6/PRE9/PUP3/SCL1/PRE2/PRE8/PRE5/PRE10/CAALFM_C106390WA/RAD23/RPN3/PRE3	13	0		13	3645874/30515395/3638311/3646718/3640510/3643490/3641906/3643111/3636957/3639558/3635834/3636917/3643660
BP	GO:1901565	organonitrogen compound catabolic process	15/462	37/1862	0.0243047	0.705953	3645874/30515395/3638311/3646847/3646718/3640510/3643490/3641906/3646505/3643111/3636957/3639558/3635834/3636917/3643660	CAALFM_C602300CA/PRE6/PRE9/CAALFM_C404270WA/PUP3/SCL1/PRE2/PRE8/GCV2/PRE5/PRE10/CAALFM_C106390WA/RAD23/RPN3/PRE3	15	1	3646847	14	3645874/30515395/3638311/3646718/3640510/3643490/3641906/3646505/3643111/3636957/3639558/3635834/3636917/3643660
BP	GO:0043038	amino acid activation	14/462	34/1862	0.0252857	0.705953	3636831/3645124/3645956/3640285/3640121/3640275/3647882/3645137/3638029/3636516/3636398/3640128/3638486/3640232	MST1/CAALFM_CR03110WA/ILS1/ALA1/FRS1/NAM2/THS1/CAALFM_CR03400WA/GUS1/MES1/MSM1/CDC60/KRS1/CAALFM_C101530CA	14	0		14	3636831/3645124/3645956/3640285/3640121/3640275/3647882/3645137/3638029/3636516/3636398/3640128/3638486/3640232
BP	GO:0043039	tRNA aminoacylation	14/462	34/1862	0.0252857	0.705953	3636831/3645124/3645956/3640285/3640121/3640275/3647882/3645137/3638029/3636516/3636398/3640128/3638486/3640232	MST1/CAALFM_CR03110WA/ILS1/ALA1/FRS1/NAM2/THS1/CAALFM_CR03400WA/GUS1/MES1/MSM1/CDC60/KRS1/CAALFM_C101530CA	14	0		14	3636831/3645124/3645956/3640285/3640121/3640275/3647882/3645137/3638029/3636516/3636398/3640128/3638486/3640232
BP	GO:0006418	tRNA aminoacylation for protein translation	13/462	31/1862	0.0261525	0.705953	3636831/3645956/3640285/3640121/3640275/3647882/3645137/3638029/3636516/3636398/3640128/3638486/3640232	MST1/ILS1/ALA1/FRS1/NAM2/THS1/CAALFM_CR03400WA/GUS1/MES1/MSM1/CDC60/KRS1/CAALFM_C101530CA	13	0		13	3636831/3645956/3640285/3640121/3640275/3647882/3645137/3638029/3636516/3636398/3640128/3638486/3640232
BP	GO:0006643	membrane lipid metabolic process	6/462	11/1862	0.0327113	0.705953	3642962/3645575/3635641/3641019/3641607/3637921	YDC1/GWT1/CAALFM_C402100CA/SPT14/CAALFM_C601370WA/CAALFM_C403130WA	6	5	3642962/3645575/3635641/3641019/3637921	1	3641607
BP	GO:0006887	exocytosis	6/462	11/1862	0.0327113	0.705953	3646845/3642961/3642806/3642916/3643731/3636935	SEC15/SEC10/SEC3/CAALFM_C406810CA/RCY1/SEC1	6	6	3646845/3642961/3642806/3642916/3643731/3636935	0
BP	GO:0032940	secretion by cell	6/462	11/1862	0.0327113	0.705953	3646845/3642961/3642806/3642916/3643731/3636935	SEC15/SEC10/SEC3/CAALFM_C406810CA/RCY1/SEC1	6	6	3646845/3642961/3642806/3642916/3643731/3636935	0
BP	GO:0046903	secretion	6/462	11/1862	0.0327113	0.705953	3646845/3642961/3642806/3642916/3643731/3636935	SEC15/SEC10/SEC3/CAALFM_C406810CA/RCY1/SEC1	6	6	3646845/3642961/3642806/3642916/3643731/3636935	0
BP	GO:0044257	cellular protein catabolic process	12/462	29/1862	0.0358092	0.705953	3645874/30515395/3638311/3646718/3640510/3643490/3641906/3643111/3636957/3639558/3635834/3643660	CAALFM_C602300CA/PRE6/PRE9/PUP3/SCL1/PRE2/PRE8/PRE5/PRE10/CAALFM_C106390WA/RAD23/PRE3	12	0		12	3645874/30515395/3638311/3646718/3640510/3643490/3641906/3643111/3636957/3639558/3635834/3643660
BP	GO:0051603	proteolysis involved in cellular protein catabolic process	12/462	29/1862	0.0358092	0.705953	3645874/30515395/3638311/3646718/3640510/3643490/3641906/3643111/3636957/3639558/3635834/3643660	CAALFM_C602300CA/PRE6/PRE9/PUP3/SCL1/PRE2/PRE8/PRE5/PRE10/CAALFM_C106390WA/RAD23/PRE3	12	0		12	3645874/30515395/3638311/3646718/3640510/3643490/3641906/3643111/3636957/3639558/3635834/3643660
BP	GO:0009057	macromolecule catabolic process	13/462	35/1862	0.0699075	0.717648	3645874/30515395/3638311/3646718/3640510/3643490/3641906/3643111/3636957/3639558/3635834/3636917/3643660	CAALFM_C602300CA/PRE6/PRE9/PUP3/SCL1/PRE2/PRE8/PRE5/PRE10/CAALFM_C106390WA/RAD23/RPN3/PRE3	13	0		13	3645874/30515395/3638311/3646718/3640510/3643490/3641906/3643111/3636957/3639558/3635834/3636917/3643660
BP	GO:0006511	ubiquitin-dependent protein catabolic process	9/462	22/1862	0.070393	0.717648	3645874/30515395/3638311/3640510/3641906/3643111/3636957/3639558/3635834	CAALFM_C602300CA/PRE6/PRE9/SCL1/PRE8/PRE5/PRE10/CAALFM_C106390WA/RAD23	9	0		9	3645874/30515395/3638311/3640510/3641906/3643111/3636957/3639558/3635834
BP	GO:0019941	modification-dependent protein catabolic process	9/462	22/1862	0.070393	0.717648	3645874/30515395/3638311/3640510/3641906/3643111/3636957/3639558/3635834	CAALFM_C602300CA/PRE6/PRE9/SCL1/PRE8/PRE5/PRE10/CAALFM_C106390WA/RAD23	9	0		9	3645874/30515395/3638311/3640510/3641906/3643111/3636957/3639558/3635834
BP	GO:0034622	cellular protein-containing complex assembly	9/462	22/1862	0.070393	0.717648	3642502/3638917/30515038/3639714/3642929/30515358/3635665/3646043/3638433	CAALFM_CR05970CA/CAALFM_CR10180WA/PET100/NAP1/EXM2/HHO1/CAALFM_C401950WA/ARC15/ECM29	9	5	3638917/3642929/30515358/3635665/3646043	4	3642502/30515038/3639714/3638433
BP	GO:0043632	modification-dependent macromolecule catabolic process	9/462	22/1862	0.070393	0.717648	3645874/30515395/3638311/3640510/3641906/3643111/3636957/3639558/3635834	CAALFM_C602300CA/PRE6/PRE9/SCL1/PRE8/PRE5/PRE10/CAALFM_C106390WA/RAD23	9	0		9	3645874/30515395/3638311/3640510/3641906/3643111/3636957/3639558/3635834
BP	GO:0006497	protein lipidation	5/462	10/1862	0.075405	0.717648	3645575/3635641/3641019/3641607/3637921	GWT1/CAALFM_C402100CA/SPT14/CAALFM_C601370WA/CAALFM_C403130WA	5	4	3645575/3635641/3641019/3637921	1	3641607
BP	GO:0006505	GPI anchor metabolic process	5/462	10/1862	0.075405	0.717648	3645575/3635641/3641019/3641607/3637921	GWT1/CAALFM_C402100CA/SPT14/CAALFM_C601370WA/CAALFM_C403130WA	5	4	3645575/3635641/3641019/3637921	1	3641607
BP	GO:0006506	GPI anchor biosynthetic process	5/462	10/1862	0.075405	0.717648	3645575/3635641/3641019/3641607/3637921	GWT1/CAALFM_C402100CA/SPT14/CAALFM_C601370WA/CAALFM_C403130WA	5	4	3645575/3635641/3641019/3637921	1	3641607
BP	GO:0006661	phosphatidylinositol biosynthetic process	5/462	10/1862	0.075405	0.717648	3645575/3635641/3641019/3641607/3637921	GWT1/CAALFM_C402100CA/SPT14/CAALFM_C601370WA/CAALFM_C403130WA	5	4	3645575/3635641/3641019/3637921	1	3641607
BP	GO:0006664	glycolipid metabolic process	5/462	10/1862	0.075405	0.717648	3645575/3635641/3641019/3641607/3637921	GWT1/CAALFM_C402100CA/SPT14/CAALFM_C601370WA/CAALFM_C403130WA	5	4	3645575/3635641/3641019/3637921	1	3641607
BP	GO:0009247	glycolipid biosynthetic process	5/462	10/1862	0.075405	0.717648	3645575/3635641/3641019/3641607/3637921	GWT1/CAALFM_C402100CA/SPT14/CAALFM_C601370WA/CAALFM_C403130WA	5	4	3645575/3635641/3641019/3637921	1	3641607
BP	GO:0042157	lipoprotein metabolic process	5/462	10/1862	0.075405	0.717648	3645575/3635641/3641019/3641607/3637921	GWT1/CAALFM_C402100CA/SPT14/CAALFM_C601370WA/CAALFM_C403130WA	5	4	3645575/3635641/3641019/3637921	1	3641607
BP	GO:0042158	lipoprotein biosynthetic process	5/462	10/1862	0.075405	0.717648	3645575/3635641/3641019/3641607/3637921	GWT1/CAALFM_C402100CA/SPT14/CAALFM_C601370WA/CAALFM_C403130WA	5	4	3645575/3635641/3641019/3637921	1	3641607
BP	GO:0046467	membrane lipid biosynthetic process	5/462	10/1862	0.075405	0.717648	3645575/3635641/3641019/3641607/3637921	GWT1/CAALFM_C402100CA/SPT14/CAALFM_C601370WA/CAALFM_C403130WA	5	4	3645575/3635641/3641019/3637921	1	3641607
BP	GO:1903509	liposaccharide metabolic process	5/462	10/1862	0.075405	0.717648	3645575/3635641/3641019/3641607/3637921	GWT1/CAALFM_C402100CA/SPT14/CAALFM_C601370WA/CAALFM_C403130WA	5	4	3645575/3635641/3641019/3637921	1	3641607
BP	GO:0046488	phosphatidylinositol metabolic process	6/462	14/1862	0.107559	0.936817	3645575/3635641/3641019/3641607/3635766/3637921	GWT1/CAALFM_C402100CA/SPT14/CAALFM_C601370WA/FAB1/CAALFM_C403130WA	6	5	3645575/3635641/3641019/3635766/3637921	1	3641607
BP	GO:0045017	glycerolipid biosynthetic process	5/462	11/1862	0.110983	0.936817	3645575/3635641/3641019/3641607/3637921	GWT1/CAALFM_C402100CA/SPT14/CAALFM_C601370WA/CAALFM_C403130WA	5	4	3645575/3635641/3641019/3637921	1	3641607
BP	GO:0046474	glycerophospholipid biosynthetic process	5/462	11/1862	0.110983	0.936817	3645575/3635641/3641019/3641607/3637921	GWT1/CAALFM_C402100CA/SPT14/CAALFM_C601370WA/CAALFM_C403130WA	5	4	3645575/3635641/3641019/3637921	1	3641607
BP	GO:0044265	cellular macromolecule catabolic process	12/462	34/1862	0.112038	0.936817	3645874/30515395/3638311/3646718/3640510/3643490/3641906/3643111/3636957/3639558/3635834/3643660	CAALFM_C602300CA/PRE6/PRE9/PUP3/SCL1/PRE2/PRE8/PRE5/PRE10/CAALFM_C106390WA/RAD23/PRE3	12	0		12	3645874/30515395/3638311/3646718/3640510/3643490/3641906/3643111/3636957/3639558/3635834/3643660
BP	GO:0065003	protein-containing complex assembly	9/462	24/1862	0.115405	0.936817	3642502/3638917/30515038/3639714/3642929/30515358/3635665/3646043/3638433	CAALFM_CR05970CA/CAALFM_CR10180WA/PET100/NAP1/EXM2/HHO1/CAALFM_C401950WA/ARC15/ECM29	9	5	3638917/3642929/30515358/3635665/3646043	4	3642502/30515038/3639714/3638433
BP	GO:0055085	transmembrane transport	70/462	250/1862	0.120543	0.950569	3642793/3642278/3636130/3636968/3635860/3645111/3640573/3642614/3642635/3646404/3640768/3635201/3640165/3638855/3641932/3639256/3639546/3636156/3643662/3647697/3638876/3642288/3634898/3646508/3641214/3647066/3647389/3643964/3640089/3639894/3638865/3642303/3636142/3644698/3643029/3639549/3639260/3637382/3640941/3644867/3642785/3645361/3647671/3646954/3636801/3639870/3645008/3647141/3635861/3645969…	CAALFM_C406440CA/JEN1/DAL7/TOM40/CAALFM_C202580WA/HGT18/NGT1/SGE1/GIT4/HGT9/OPT5/HGT5/CAALFM_CR01340WA/CAALFM_C200550WA/CAALFM_CR09390CA/MDL2/HAK1/CAALFM_C112930CA/GAP2/OPT4/HGT7/HST6/CAALFM_C109220WA/VCX1/JEN2/CAN3/CDR11/YOR1/PTR2/UGA4/CAALFM_C200540WA/YVC1/DUR32/POR1/CAALFM_C202790CA/CAALFM_C106510CA/MDR1/SSY1/QDR1/CAALFM_CR06230WA/XUT1/CAALFM_C403700WA/GPT1/GAP5/PUT4/CAALFM_C106000WA/OPT7/NHX1…	70	45	3642793/3642278/3636130/3635860/3645111/3640573/3642635/3646404/3640768/3635201/3640165/3638855/3641932/3639546/3636156/3643662/3647697/3642288/3634898/3646508/3641214/3640089/3639894/3642303/3636142/3644698/3643029/3639549/3642785/3645361/3647671/3646954/3636801/3639870/3645008/3635861/3646857/3641902/3637701/3642821/3645012/3635858/3640111/3639861/30515402	25	3636968/3642614/3639256/3638876/3647066/3647389/3643964/3638865/3639260/3637382/3640941/3644867/3647141/3645969/3638948/3644035/3647077/3640290/3644023/3646284/3642307/3638396/3641636/3647397/3641625
BP	GO:0051179	localization	106/462	390/1862	0.125156	0.959531	3642793/3642278/3645373/3648085/3636130/3635688/3636968/30515262/3635860/3645111/3636457/3642824/3640407/3640573/3642614/3636511/3646845/3642635/3642961/3646404/3637844/3636834/3640993/3640768/3635201/3640165/3638855/3641932/3639256/3639546/3636156/3643662/3637401/3640587/3647697/3638876/3642288/3634898/3641898/3646508/3641214/3647066/3647389/3643964/3640089/3635662/3645870/3639894/3638865/364230…	CAALFM_C406440CA/JEN1/CAALFM_C403560WA/CAALFM_C406130WA/DAL7/MLP1/TOM40/CAALFM_C403930CA/CAALFM_C202580WA/HGT18/TIP20/CAALFM_C406370CA/HSE1/NGT1/SGE1/CAALFM_C504580CA/SEC15/GIT4/SEC10/HGT9/CAALFM_C402460WA/CAALFM_C102960CA/CAALFM_CR04280CA/OPT5/HGT5/CAALFM_CR01340WA/CAALFM_C200550WA/CAALFM_CR09390CA/MDL2/HAK1/CAALFM_C112930CA/GAP2/CAALFM_C203800CA/IST1/OPT4/HGT7/HST6/CAALFM_C109220WA/PHO88/VCX1/J…	106	71	3642793/3642278/3645373/3648085/3636130/3635688/30515262/3635860/3645111/3636457/3642824/3640573/3636511/3646845/3642635/3642961/3646404/3637844/3636834/3640993/3640768/3635201/3640165/3638855/3641932/3639546/3636156/3643662/3637401/3640587/3647697/3642288/3634898/3646508/3641214/3640089/3635662/3639894/3642303/3636142/3644698/3643029/3642806/3639549/3634800/3642785/3645361/3647671/3646954/363680…	35	3636968/3640407/3642614/3639256/3638876/3641898/3647066/3647389/3643964/3645870/3638865/3636860/3639260/3637382/3640941/3644867/3639326/3647141/3645969/3638948/3645794/3647897/3640214/3636817/3644035/3647077/3640290/3644023/3646284/3641631/3642307/3638396/3641636/3647397/3641625
BP	GO:0006650	glycerophospholipid metabolic process	6/462	15/1862	0.143367	0.997286	3645575/3635641/3641019/3641607/3635766/3637921	GWT1/CAALFM_C402100CA/SPT14/CAALFM_C601370WA/FAB1/CAALFM_C403130WA	6	5	3645575/3635641/3641019/3635766/3637921	1	3641607
BP	GO:0046486	glycerolipid metabolic process	6/462	15/1862	0.143367	0.997286	3645575/3635641/3641019/3641607/3635766/3637921	GWT1/CAALFM_C402100CA/SPT14/CAALFM_C601370WA/FAB1/CAALFM_C403130WA	6	5	3645575/3635641/3641019/3635766/3637921	1	3641607
BP	GO:0006810	transport	103/462	381/1862	0.144848	0.997286	3642793/3642278/3645373/3636130/3635688/3636968/30515262/3635860/3645111/3636457/3642824/3640407/3640573/3642614/3636511/3646845/3642635/3642961/3646404/3640993/3640768/3635201/3640165/3638855/3641932/3639256/3639546/3636156/3643662/3637401/3640587/3647697/3638876/3642288/3634898/3641898/3646508/3641214/3647066/3647389/3643964/3640089/3635662/3645870/3639894/3638865/3642303/3636142/3644698/364302…	CAALFM_C406440CA/JEN1/CAALFM_C403560WA/DAL7/MLP1/TOM40/CAALFM_C403930CA/CAALFM_C202580WA/HGT18/TIP20/CAALFM_C406370CA/HSE1/NGT1/SGE1/CAALFM_C504580CA/SEC15/GIT4/SEC10/HGT9/CAALFM_CR04280CA/OPT5/HGT5/CAALFM_CR01340WA/CAALFM_C200550WA/CAALFM_CR09390CA/MDL2/HAK1/CAALFM_C112930CA/GAP2/CAALFM_C203800CA/IST1/OPT4/HGT7/HST6/CAALFM_C109220WA/PHO88/VCX1/JEN2/CAN3/CDR11/YOR1/PTR2/CLC1/SEC27/UGA4/CAALFM_C20…	103	68	3642793/3642278/3645373/3636130/3635688/30515262/3635860/3645111/3636457/3642824/3640573/3636511/3646845/3642635/3642961/3646404/3640993/3640768/3635201/3640165/3638855/3641932/3639546/3636156/3643662/3637401/3640587/3647697/3642288/3634898/3646508/3641214/3640089/3635662/3639894/3642303/3636142/3644698/3643029/3642806/3639549/3634800/3642785/3645361/3647671/3646954/3636801/3639870/3645008/363586…	35	3636968/3640407/3642614/3639256/3638876/3641898/3647066/3647389/3643964/3645870/3638865/3636860/3639260/3637382/3640941/3644867/3639326/3647141/3645969/3638948/3645794/3647897/3640214/3636817/3644035/3647077/3640290/3644023/3646284/3641631/3642307/3638396/3641636/3647397/3641625
BP	GO:0043933	protein-containing complex subunit organization	10/462	29/1862	0.158532	0.997286	3642502/3638917/30515038/3639714/3641648/3642929/30515358/3635665/3646043/3638433	CAALFM_CR05970CA/CAALFM_CR10180WA/PET100/NAP1/ANB1/EXM2/HHO1/CAALFM_C401950WA/ARC15/ECM29	10	5	3638917/3642929/30515358/3635665/3646043	5	3642502/30515038/3639714/3641648/3638433
BP	GO:0051234	establishment of localization	103/462	383/1862	0.160664	0.997286	3642793/3642278/3645373/3636130/3635688/3636968/30515262/3635860/3645111/3636457/3642824/3640407/3640573/3642614/3636511/3646845/3642635/3642961/3646404/3640993/3640768/3635201/3640165/3638855/3641932/3639256/3639546/3636156/3643662/3637401/3640587/3647697/3638876/3642288/3634898/3641898/3646508/3641214/3647066/3647389/3643964/3640089/3635662/3645870/3639894/3638865/3642303/3636142/3644698/364302…	CAALFM_C406440CA/JEN1/CAALFM_C403560WA/DAL7/MLP1/TOM40/CAALFM_C403930CA/CAALFM_C202580WA/HGT18/TIP20/CAALFM_C406370CA/HSE1/NGT1/SGE1/CAALFM_C504580CA/SEC15/GIT4/SEC10/HGT9/CAALFM_CR04280CA/OPT5/HGT5/CAALFM_CR01340WA/CAALFM_C200550WA/CAALFM_CR09390CA/MDL2/HAK1/CAALFM_C112930CA/GAP2/CAALFM_C203800CA/IST1/OPT4/HGT7/HST6/CAALFM_C109220WA/PHO88/VCX1/JEN2/CAN3/CDR11/YOR1/PTR2/CLC1/SEC27/UGA4/CAALFM_C20…	103	68	3642793/3642278/3645373/3636130/3635688/30515262/3635860/3645111/3636457/3642824/3640573/3636511/3646845/3642635/3642961/3646404/3640993/3640768/3635201/3640165/3638855/3641932/3639546/3636156/3643662/3637401/3640587/3647697/3642288/3634898/3646508/3641214/3640089/3635662/3639894/3642303/3636142/3644698/3643029/3642806/3639549/3634800/3642785/3645361/3647671/3646954/3636801/3639870/3645008/363586…	35	3636968/3640407/3642614/3639256/3638876/3641898/3647066/3647389/3643964/3645870/3638865/3636860/3639260/3637382/3640941/3644867/3639326/3647141/3645969/3638948/3645794/3647897/3640214/3636817/3644035/3647077/3640290/3644023/3646284/3641631/3642307/3638396/3641636/3647397/3641625
BP	GO:0007059	chromosome segregation	6/462	16/1862	0.183818	0.997286	3645874/3638037/3635656/3644120/3641815/3640172	CAALFM_C602300CA/DCC1/ASK1/CTF8/BRN1/CAALFM_C101070CA	6	4	3638037/3635656/3641815/3640172	2	3645874/3644120
BP	GO:0019538	protein metabolic process	102/462	382/1862	0.185671	0.997286	3638384/3635769/3646669/3640999/3636831/3645874/3641116/3641127/3634767/3645956/3637922/3640285/3639889/3641734/30515395/3639724/3638884/3636589/3638311/3637393/3639723/3644405/3646074/3639658/3646358/3646979/3640121/3646718/3641106/3640510/3643513/3645575/3640953/3643482/3634904/3635641/3641888/3639497/3643490/3640275/3641611/3647882/3641906/3640548/3642244/3641648/3645137/30515335/3643111/36444…	KRE5/CAALFM_C202020WA/GPI8/PIM1/MST1/CAALFM_C602300CA/PMT6/CAALFM_C404460CA/RAM2/ILS1/BUB1/ALA1/PRC3/CAM1/PRE6/MRPL6/CAALFM_C200700WA/AFG3/PRE9/HOG1/CAALFM_CR00490WA/MNN2/CAALFM_C600340CA/CAALFM_CR00660WA/CAM1-1/LAP4/FRS1/PUP3/CAALFM_C404550CA/SCL1/CAALFM_C207190CA/GWT1/HST7/TPK2/MNN12/CAALFM_C402100CA/MPS1/MRPL19/PRE2/NAM2/PTK2/THS1/PRE8/CAALFM_C300450CA/CYM1/ANB1/CAALFM_CR03400WA/RPL32/PRE5/CAA…	102	30	3641116/3641127/3634767/3637922/3639889/3639658/3646979/3641106/3645575/3643482/3634904/3635641/3644435/3641019/3642789/3641012/3641144/3642959/3638789/3636978/3645897/3647044/3641896/3644040/3637921/3636487/3645205/3635588/3642481/3642097	72	3638384/3635769/3646669/3640999/3636831/3645874/3645956/3640285/3641734/30515395/3639724/3638884/3636589/3638311/3637393/3639723/3644405/3646074/3646358/3640121/3646718/3640510/3643513/3640953/3641888/3639497/3643490/3640275/3641611/3647882/3641906/3640548/3642244/3641648/3645137/30515335/3643111/3642506/3637986/3636957/3641607/3646039/3639558/3645443/3637815/3639317/3638029/3647903/3636516/36440…
BP	GO:0000278	mitotic cell cycle	5/462	13/1862	0.200644	0.997286	3645874/3638037/3644120/3643783/3641815	CAALFM_C602300CA/DCC1/CTF8/MTW1/BRN1	5	3	3638037/3643783/3641815	2	3645874/3644120
BP	GO:0016579	protein deubiquitination	5/462	13/1862	0.200644	0.997286	3635769/3639317/3647903/3642501/3643337	CAALFM_C202020WA/UBP6/CAALFM_C600170CA/CAALFM_CR05980WA/DOA4	5	0		5	3635769/3639317/3647903/3642501/3643337
BP	GO:0070646	protein modification by small protein removal	5/462	13/1862	0.200644	0.997286	3635769/3639317/3647903/3642501/3643337	CAALFM_C202020WA/UBP6/CAALFM_C600170CA/CAALFM_CR05980WA/DOA4	5	0		5	3635769/3639317/3647903/3642501/3643337
BP	GO:0065008	regulation of biological quality	11/462	34/1862	0.201131	0.997286	3642631/3648085/3646660/3641367/3637844/3640185/3646505/3635665/3646043/3646037/3640957	TRX2/CAALFM_C406130WA/CAALFM_C107630WA/PDI1/CAALFM_C402460WA/CAALFM_C101300WA/GCV2/CAALFM_C401950WA/ARC15/LPD1/CAALFM_CR03930CA	11	5	3642631/3648085/3637844/3635665/3646043	6	3646660/3641367/3640185/3646505/3646037/3640957
BP	GO:0001522	pseudouridine synthesis	4/462	10/1862	0.219271	0.997286	3645332/3645881/3642927/3647682	GAR1/CAALFM_C602350CA/CAALFM_C406950WA/CAALFM_C110620WA	4	1	3642927	3	3645332/3645881/3647682
BP	GO:0009966	regulation of signal transduction	4/462	10/1862	0.219271	0.997286	3646953/3637434/3643737/3635220	TSC2/ROM2/CDC24/SEC7	4	2	3646953/3635220	2	3637434/3643737
BP	GO:0010646	regulation of cell communication	4/462	10/1862	0.219271	0.997286	3646953/3637434/3643737/3635220	TSC2/ROM2/CDC24/SEC7	4	2	3646953/3635220	2	3637434/3643737
BP	GO:0023051	regulation of signaling	4/462	10/1862	0.219271	0.997286	3646953/3637434/3643737/3635220	TSC2/ROM2/CDC24/SEC7	4	2	3646953/3635220	2	3637434/3643737
BP	GO:0048285	organelle fission	4/462	10/1862	0.219271	0.997286	3645874/3638037/3644120/3641815	CAALFM_C602300CA/DCC1/CTF8/BRN1	4	2	3638037/3641815	2	3645874/3644120
BP	GO:0048583	regulation of response to stimulus	4/462	10/1862	0.219271	0.997286	3646953/3637434/3643737/3635220	TSC2/ROM2/CDC24/SEC7	4	2	3646953/3635220	2	3637434/3643737
BP	GO:1903047	mitotic cell cycle process	4/462	10/1862	0.219271	0.997286	3645874/3638037/3644120/3641815	CAALFM_C602300CA/DCC1/CTF8/BRN1	4	2	3638037/3641815	2	3645874/3644120
BP	GO:0006357	regulation of transcription by RNA polymerase II	8/462	24/1862	0.225827	0.997286	30515250/3641128/3648211/3644103/3643511/3637418/3635845/3639245	MED20/SRB8/MED5/MED18/AFT2/MED1/SRB9/CAALFM_C602790CA	8	6	30515250/3641128/3648211/3644103/3637418/3635845	2	3643511/3639245
BP	GO:0007264	small GTPase mediated signal transduction	5/462	14/1862	0.252358	0.997286	3646953/3637434/3643737/3635220/3643298	TSC2/ROM2/CDC24/SEC7/GDI1	5	2	3646953/3635220	3	3637434/3643737/3643298
BP	GO:0098813	nuclear chromosome segregation	5/462	14/1862	0.252358	0.997286	3645874/3638037/3635656/3644120/3641815	CAALFM_C602300CA/DCC1/ASK1/CTF8/BRN1	5	3	3638037/3635656/3641815	2	3645874/3644120
BP	GO:0051641	cellular localization	22/462	77/1862	0.25553	0.997286	3645373/3648085/3635688/30515262/3640407/3646845/3642961/3637844/3636834/3641898/3635662/3645870/3634800/3639326/3642916/3647413/3645794/3643731/3640214/3636817/3636935/3638515	CAALFM_C403560WA/CAALFM_C406130WA/MLP1/CAALFM_C403930CA/HSE1/SEC15/SEC10/CAALFM_C402460WA/CAALFM_C102960CA/PHO88/CLC1/SEC27/VPS41/VPS27/CAALFM_C406810CA/CAALFM_C405180CA/VPS28/RCY1/TRS20/TOM20/SEC1/CAALFM_C307050WA	22	15	3645373/3648085/3635688/30515262/3646845/3642961/3637844/3636834/3635662/3634800/3642916/3647413/3643731/3636935/3638515	7	3640407/3641898/3645870/3639326/3645794/3640214/3636817
BP	GO:0006520	cellular amino acid metabolic process	19/462	66/1862	0.264322	0.997286	3636831/3645124/3645956/3640285/3640121/3640084/3645728/3640275/3647882/3646505/3645137/3638029/3636516/3636398/3640128/3641813/3636501/3638486/3640232	MST1/CAALFM_CR03110WA/ILS1/ALA1/FRS1/MET6/URA2/NAM2/THS1/GCV2/CAALFM_CR03400WA/GUS1/MES1/MSM1/CDC60/CAALFM_C405640CA/HIS1/KRS1/CAALFM_C101530CA	19	2	3641813/3636501	17	3636831/3645124/3645956/3640285/3640121/3640084/3645728/3640275/3647882/3646505/3645137/3638029/3636516/3636398/3640128/3638486/3640232
BP	GO:0008654	phospholipid biosynthetic process	6/462	18/1862	0.275374	0.997286	3638966/3645575/3635641/3641019/3641607/3637921	INO1/GWT1/CAALFM_C402100CA/SPT14/CAALFM_C601370WA/CAALFM_C403130WA	6	4	3645575/3635641/3641019/3637921	2	3638966/3641607
BP	GO:0016051	carbohydrate biosynthetic process	4/462	11/1862	0.28115	0.997286	3638966/3640410/3640435/3639844	INO1/GSL2/GSY1/GSL1	4	2	3640410/3639844	2	3638966/3640435
BP	GO:0006457	protein folding	5/462	15/1862	0.306854	0.997286	3635692/3641554/3644841/3640133/3641623	CAALFM_C402240CA/CAALFM_C500350CA/SIS1/MGE1/CAALFM_C601460CA	5	2	3635692/3644841	3	3641554/3640133/3641623
BP	GO:0022402	cell cycle process	5/462	15/1862	0.306854	0.997286	3645874/3638037/3635656/3644120/3641815	CAALFM_C602300CA/DCC1/ASK1/CTF8/BRN1	5	3	3638037/3635656/3641815	2	3645874/3644120
BP	GO:1901564	organonitrogen compound metabolic process	126/462	490/1862	0.315099	0.997286	3638384/3636649/3647071/3635769/3646669/3640999/3636831/3645874/3645124/3641116/3641127/3634767/3645956/3637922/3640285/3639889/3641734/30515395/3639724/3638884/3636589/3638311/3637393/3641769/3639723/3644405/3646074/3639658/3646847/3646358/3646979/3640121/3646718/3641106/3640510/3643513/3640719/3642962/3645575/3640953/3643482/3634904/3635641/3640084/3645728/3641888/3639497/3643490/3640275/364161…	KRE5/URA3/COX15/CAALFM_C202020WA/GPI8/PIM1/MST1/CAALFM_C602300CA/CAALFM_CR03110WA/PMT6/CAALFM_C404460CA/RAM2/ILS1/BUB1/ALA1/PRC3/CAM1/PRE6/MRPL6/CAALFM_C200700WA/AFG3/PRE9/HOG1/ADE4/CAALFM_CR00490WA/MNN2/CAALFM_C600340CA/CAALFM_CR00660WA/CAALFM_C404270WA/CAM1-1/LAP4/FRS1/PUP3/CAALFM_C404550CA/SCL1/CAALFM_C207190CA/ADE5%2C7/YDC1/GWT1/HST7/TPK2/MNN12/CAALFM_C402100CA/MET6/URA2/MPS1/MRPL19/PRE2/NAM2…	126	39	3636649/3641116/3641127/3634767/3637922/3639889/3639658/3646847/3646979/3641106/3642962/3645575/3643482/3634904/3635641/3644435/3641019/3642789/3641012/3641144/3642959/3642994/3638789/3636978/3636459/3645897/3647044/3641896/3644040/3638333/3644116/3641813/3636501/3637921/3636487/3645205/3635588/3642481/3642097	87	3638384/3647071/3635769/3646669/3640999/3636831/3645874/3645124/3645956/3640285/3641734/30515395/3639724/3638884/3636589/3638311/3637393/3641769/3639723/3644405/3646074/3646358/3640121/3646718/3640510/3643513/3640719/3640953/3640084/3645728/3641888/3639497/3643490/3640275/3641611/3647882/3641906/3640548/3642244/3641648/3646505/3645137/30515335/3643111/3642506/3637986/3646827/3636957/3641607/36460…
BP	GO:0022607	cellular component assembly	9/462	30/1862	0.316635	0.997286	3642502/3638917/30515038/3639714/3642929/30515358/3635665/3646043/3638433	CAALFM_CR05970CA/CAALFM_CR10180WA/PET100/NAP1/EXM2/HHO1/CAALFM_C401950WA/ARC15/ECM29	9	5	3638917/3642929/30515358/3635665/3646043	4	3642502/30515038/3639714/3638433
BP	GO:1901575	organic substance catabolic process	20/462	72/1862	0.318518	0.997286	3645874/3634888/3636558/30515395/3638311/3646847/3646718/3640510/3644563/3643490/3641906/3646505/3643111/3636957/3639558/3643438/3634797/3635834/3636917/3643660	CAALFM_C602300CA/LIP1/PXP2/PRE6/PRE9/CAALFM_C404270WA/PUP3/SCL1/GPD2/PRE2/PRE8/GCV2/PRE5/PRE10/CAALFM_C106390WA/CDC19/LIP3/RAD23/RPN3/PRE3	20	4	3634888/3636558/3646847/3634797	16	3645874/30515395/3638311/3646718/3640510/3644563/3643490/3641906/3646505/3643111/3636957/3639558/3643438/3635834/3636917/3643660
BP	GO:0005975	carbohydrate metabolic process	22/462	80/1862	0.325341	0.997286	3636797/3638966/3641566/3644416/3635636/3634913/3636421/3644563/3641015/3637905/3640410/3643438/3636837/3636584/3646981/3640435/3635691/3639844/3635650/3644572/3636523/3636816	SCW4/INO1/ROT2/CAALFM_C111080WA/MDH1-1/ZWF1/CAALFM_C504940WA/GPD2/HXK2/CRH11/GSL2/CDC19/XOG1/CAALFM_C301820WA/HEX1/GSY1/BGL2/GSL1/CAALFM_C401220CA/CAALFM_C102320CA/CHT2/EXG2	22	13	3636797/3641566/3635636/3634913/3636421/3637905/3640410/3636837/3636584/3646981/3635691/3639844/3635650	9	3638966/3644416/3644563/3641015/3643438/3640435/3644572/3636523/3636816
BP	GO:0051128	regulation of cellular component organization	4/462	12/1862	0.345181	0.997286	3645874/3641648/3635665/3646043	CAALFM_C602300CA/ANB1/CAALFM_C401950WA/ARC15	4	2	3635665/3646043	2	3645874/3641648
BP	GO:0008610	lipid biosynthetic process	9/462	31/1862	0.356224	0.997286	3638966/3645575/3635641/3636655/3641019/3641607/3646982/3637921/3641881	INO1/GWT1/CAALFM_C402100CA/ERG6/SPT14/CAALFM_C601370WA/BTS1/CAALFM_C403130WA/ERG13	9	4	3645575/3635641/3641019/3637921	5	3638966/3636655/3641607/3646982/3641881
BP	GO:0044085	cellular component biogenesis	16/462	58/1862	0.358056	0.997286	3642502/3639219/3638917/3648179/30515038/3639714/3645332/3642929/30515358/3635665/3646043/3644105/3638433/3635757/3638502/3639857	CAALFM_CR05970CA/MRT4/CAALFM_CR10180WA/SPB1/PET100/NAP1/GAR1/EXM2/HHO1/CAALFM_C401950WA/ARC15/PES1/ECM29/UTP21/CAALFM_C306760WA/BMS1	16	5	3638917/3642929/30515358/3635665/3646043	11	3642502/3639219/3648179/30515038/3639714/3645332/3644105/3638433/3635757/3638502/3639857
BP	GO:0045454	cell redox homeostasis	5/462	16/1862	0.362779	0.997286	3642631/3646660/3641367/3640185/3646037	TRX2/CAALFM_C107630WA/PDI1/CAALFM_C101300WA/LPD1	5	1	3642631	4	3646660/3641367/3640185/3646037
BP	GO:0048193	Golgi vesicle transport	5/462	16/1862	0.362779	0.997286	3636457/3637401/3646055/3640214/3636525	TIP20/CAALFM_C203800CA/CAALFM_CR07350WA/TRS20/CAALFM_C504150CA	5	4	3636457/3637401/3646055/3636525	1	3640214
BP	GO:0070647	protein modification by small protein conjugation or removal	5/462	16/1862	0.362779	0.997286	3635769/3639317/3647903/3642501/3643337	CAALFM_C202020WA/UBP6/CAALFM_C600170CA/CAALFM_CR05980WA/DOA4	5	0		5	3635769/3639317/3647903/3642501/3643337
BP	GO:0006366	transcription by RNA polymerase II	10/462	36/1862	0.400937	0.997286	30515250/3641128/3637926/3648211/3644103/3643511/3637418/3635845/3642252/3639245	MED20/SRB8/CAALFM_C403090WA/MED5/MED18/AFT2/MED1/SRB9/TAF60/CAALFM_C602790CA	10	8	30515250/3641128/3637926/3648211/3644103/3637418/3635845/3642252	2	3643511/3639245
BP	GO:0044255	cellular lipid metabolic process	11/462	40/1862	0.404746	0.997286	3638966/3636558/3642962/3645575/3635641/3641019/3641607/3635766/3646982/3637921/3641881	INO1/PXP2/YDC1/GWT1/CAALFM_C402100CA/SPT14/CAALFM_C601370WA/FAB1/BTS1/CAALFM_C403130WA/ERG13	11	7	3636558/3642962/3645575/3635641/3641019/3635766/3637921	4	3638966/3641607/3646982/3641881
BP	GO:0044262	cellular carbohydrate metabolic process	4/462	13/1862	0.40942	0.997286	3638966/3640410/3640435/3639844	INO1/GSL2/GSY1/GSL1	4	2	3640410/3639844	2	3638966/3640435
BP	GO:0019725	cellular homeostasis	5/462	17/1862	0.418886	0.997286	3642631/3646660/3641367/3640185/3646037	TRX2/CAALFM_C107630WA/PDI1/CAALFM_C101300WA/LPD1	5	1	3642631	4	3646660/3641367/3640185/3646037
BP	GO:0009451	RNA modification	6/462	21/1862	0.42538	0.997286	3645332/3635677/3645881/3642927/3647682/3644399	GAR1/CAALFM_C400940WA/CAALFM_C602350CA/CAALFM_C406950WA/CAALFM_C110620WA/CAALFM_C111160CA	6	2	3635677/3642927	4	3645332/3645881/3647682/3644399
BP	GO:0006399	tRNA metabolic process	16/462	61/1862	0.446977	0.997286	3636831/3645124/3645956/3640285/3640121/3640275/3647882/3645137/3635677/3638029/3636516/3636398/3640128/3638486/3640232/3644399	MST1/CAALFM_CR03110WA/ILS1/ALA1/FRS1/NAM2/THS1/CAALFM_CR03400WA/CAALFM_C400940WA/GUS1/MES1/MSM1/CDC60/KRS1/CAALFM_C101530CA/CAALFM_C111160CA	16	1	3635677	15	3636831/3645124/3645956/3640285/3640121/3640275/3647882/3645137/3638029/3636516/3636398/3640128/3638486/3640232/3644399
BP	GO:0006605	protein targeting	3/462	10/1862	0.468944	0.997286	30515262/3641898/3636817	CAALFM_C403930CA/PHO88/TOM20	3	1	30515262	2	3641898/3636817
BP	GO:0033365	protein localization to organelle	4/462	14/1862	0.472244	0.997286	3635688/30515262/3637844/3641898	MLP1/CAALFM_C403930CA/CAALFM_C402460WA/PHO88	4	3	3635688/30515262/3637844	1	3641898
BP	GO:0007049	cell cycle	7/462	26/1862	0.475923	0.997286	3645874/3638037/3635656/3644120/3643783/3641815/3639528	CAALFM_C602300CA/DCC1/ASK1/CTF8/MTW1/BRN1/SPO22	7	5	3638037/3635656/3643783/3641815/3639528	2	3645874/3644120
BP	GO:0009056	catabolic process	20/462	78/1862	0.476101	0.997286	3645874/3634888/3636558/30515395/3638311/3646847/3646718/3640510/3644563/3643490/3641906/3646505/3643111/3636957/3639558/3643438/3634797/3635834/3636917/3643660	CAALFM_C602300CA/LIP1/PXP2/PRE6/PRE9/CAALFM_C404270WA/PUP3/SCL1/GPD2/PRE2/PRE8/GCV2/PRE5/PRE10/CAALFM_C106390WA/CDC19/LIP3/RAD23/RPN3/PRE3	20	4	3634888/3636558/3646847/3634797	16	3645874/30515395/3638311/3646718/3640510/3644563/3643490/3641906/3646505/3643111/3636957/3639558/3643438/3635834/3636917/3643660
BP	GO:0022613	ribonucleoprotein complex biogenesis	8/462	30/1862	0.476386	0.997286	3639219/3648179/3645332/3642929/3644105/3635757/3638502/3639857	MRT4/SPB1/GAR1/EXM2/PES1/UTP21/CAALFM_C306760WA/BMS1	8	1	3642929	7	3639219/3648179/3645332/3644105/3635757/3638502/3639857
BP	GO:0016192	vesicle-mediated transport	17/462	66/1862	0.476575	0.997286	3645373/3636457/3636511/3646845/3642961/3637401/3635662/3645870/3642806/3634800/3642916/3645794/3646055/3643731/3640214/3636935/3636525	CAALFM_C403560WA/TIP20/CAALFM_C504580CA/SEC15/SEC10/CAALFM_C203800CA/CLC1/SEC27/SEC3/VPS41/CAALFM_C406810CA/VPS28/CAALFM_CR07350WA/RCY1/TRS20/SEC1/CAALFM_C504150CA	17	14	3645373/3636457/3636511/3646845/3642961/3637401/3635662/3642806/3634800/3642916/3646055/3643731/3636935/3636525	3	3645870/3645794/3640214
BP	GO:0006082	organic acid metabolic process	22/462	87/1862	0.500986	0.997286	3636831/3645124/3636558/3645956/3640285/3640121/3640574/3640084/3645728/3640275/3647882/3646505/3645137/3643438/3638029/3636516/3636398/3640128/3641813/3636501/3638486/3640232	MST1/CAALFM_CR03110WA/PXP2/ILS1/ALA1/FRS1/CAALFM_C300640WA/MET6/URA2/NAM2/THS1/GCV2/CAALFM_CR03400WA/CDC19/GUS1/MES1/MSM1/CDC60/CAALFM_C405640CA/HIS1/KRS1/CAALFM_C101530CA	22	3	3636558/3641813/3636501	19	3636831/3645124/3645956/3640285/3640121/3640574/3640084/3645728/3640275/3647882/3646505/3645137/3643438/3638029/3636516/3636398/3640128/3638486/3640232
BP	GO:0019752	carboxylic acid metabolic process	22/462	87/1862	0.500986	0.997286	3636831/3645124/3636558/3645956/3640285/3640121/3640574/3640084/3645728/3640275/3647882/3646505/3645137/3643438/3638029/3636516/3636398/3640128/3641813/3636501/3638486/3640232	MST1/CAALFM_CR03110WA/PXP2/ILS1/ALA1/FRS1/CAALFM_C300640WA/MET6/URA2/NAM2/THS1/GCV2/CAALFM_CR03400WA/CDC19/GUS1/MES1/MSM1/CDC60/CAALFM_C405640CA/HIS1/KRS1/CAALFM_C101530CA	22	3	3636558/3641813/3636501	19	3636831/3645124/3645956/3640285/3640121/3640574/3640084/3645728/3640275/3647882/3646505/3645137/3643438/3638029/3636516/3636398/3640128/3638486/3640232
BP	GO:0043436	oxoacid metabolic process	22/462	87/1862	0.500986	0.997286	3636831/3645124/3636558/3645956/3640285/3640121/3640574/3640084/3645728/3640275/3647882/3646505/3645137/3643438/3638029/3636516/3636398/3640128/3641813/3636501/3638486/3640232	MST1/CAALFM_CR03110WA/PXP2/ILS1/ALA1/FRS1/CAALFM_C300640WA/MET6/URA2/NAM2/THS1/GCV2/CAALFM_CR03400WA/CDC19/GUS1/MES1/MSM1/CDC60/CAALFM_C405640CA/HIS1/KRS1/CAALFM_C101530CA	22	3	3636558/3641813/3636501	19	3636831/3645124/3645956/3640285/3640121/3640574/3640084/3645728/3640275/3647882/3646505/3645137/3643438/3638029/3636516/3636398/3640128/3638486/3640232
BP	GO:0033036	macromolecule localization	17/462	67/1862	0.505206	0.997286	3645373/3648085/3635688/30515262/3640407/3637844/3640993/3640587/3641898/3635662/3645870/3636860/3634800/3639326/3647897/3636817/3638515	CAALFM_C403560WA/CAALFM_C406130WA/MLP1/CAALFM_C403930CA/HSE1/CAALFM_C402460WA/CAALFM_CR04280CA/IST1/PHO88/CLC1/SEC27/SEC62/VPS41/VPS27/HET1/TOM20/CAALFM_C307050WA	17	10	3645373/3648085/3635688/30515262/3637844/3640993/3640587/3635662/3634800/3638515	7	3640407/3641898/3645870/3636860/3639326/3647897/3636817
BP	GO:0042592	homeostatic process	6/462	23/1862	0.523707	0.997286	3642631/3646660/3641367/3640185/3646037/3640957	TRX2/CAALFM_C107630WA/PDI1/CAALFM_C101300WA/LPD1/CAALFM_CR03930CA	6	1	3642631	5	3646660/3641367/3640185/3646037/3640957
BP	GO:0034660	ncRNA metabolic process	19/462	76/1862	0.530215	0.997286	3636831/3645124/3645956/3640285/3648179/3640121/3640275/3647882/3645137/3635677/3638029/3636516/3636398/3640128/3635757/3638486/3638502/3640232/3644399	MST1/CAALFM_CR03110WA/ILS1/ALA1/SPB1/FRS1/NAM2/THS1/CAALFM_CR03400WA/CAALFM_C400940WA/GUS1/MES1/MSM1/CDC60/UTP21/KRS1/CAALFM_C306760WA/CAALFM_C101530CA/CAALFM_C111160CA	19	1	3635677	18	3636831/3645124/3645956/3640285/3648179/3640121/3640275/3647882/3645137/3638029/3636516/3636398/3640128/3635757/3638486/3638502/3640232/3644399
BP	GO:0044281	small molecule metabolic process	38/462	153/1862	0.530539	0.997286	3636649/3638966/3636831/3645124/3636558/3645956/3640285/3644416/3641769/3640121/3640719/3634913/3641407/3635594/3640574/3640084/3645728/3640275/3647882/3646505/3645137/3646827/3643438/3635842/3638029/3636516/3636459/3635259/3636398/3640128/3638333/3641813/3636501/3643176/3638486/3644572/3640232/3634763	URA3/INO1/MST1/CAALFM_CR03110WA/PXP2/ILS1/ALA1/CAALFM_C111080WA/ADE4/FRS1/ADE5%2C7/ZWF1/CYR1/CAALFM_C401820CA/CAALFM_C300640WA/MET6/URA2/NAM2/THS1/GCV2/CAALFM_CR03400WA/CAALFM_C112810WA/CDC19/APT1/GUS1/MES1/CAALFM_C505130CA/ADE2/MSM1/CDC60/THI6/CAALFM_C405640CA/HIS1/CAALFM_CR03740CA/KRS1/CAALFM_C102320CA/CAALFM_C101530CA/GUA1	38	9	3636649/3636558/3634913/3641407/3635594/3636459/3638333/3641813/3636501	29	3638966/3636831/3645124/3645956/3640285/3644416/3641769/3640121/3640719/3640574/3640084/3645728/3640275/3647882/3646505/3645137/3646827/3643438/3635842/3638029/3636516/3635259/3636398/3640128/3643176/3638486/3644572/3640232/3634763
BP	GO:0071702	organic substance transport	16/462	64/1862	0.535322	0.997286	3642793/3645373/3635688/30515262/3640407/3640993/3640587/3641898/3635662/3645870/3636860/3634800/3639326/3647897/3636817/3638515	CAALFM_C406440CA/CAALFM_C403560WA/MLP1/CAALFM_C403930CA/HSE1/CAALFM_CR04280CA/IST1/PHO88/CLC1/SEC27/SEC62/VPS41/VPS27/HET1/TOM20/CAALFM_C307050WA	16	9	3642793/3645373/3635688/30515262/3640993/3640587/3635662/3634800/3638515	7	3640407/3641898/3645870/3636860/3639326/3647897/3636817
BP	GO:0033043	regulation of organelle organization	3/462	11/1862	0.539366	0.997286	3645874/3635665/3646043	CAALFM_C602300CA/CAALFM_C401950WA/ARC15	3	2	3635665/3646043	1	3645874
BP	GO:0044248	cellular catabolic process	16/462	65/1862	0.56392	0.997286	3645874/3636558/30515395/3638311/3646847/3646718/3640510/3643490/3641906/3646505/3643111/3636957/3639558/3643438/3635834/3643660	CAALFM_C602300CA/PXP2/PRE6/PRE9/CAALFM_C404270WA/PUP3/SCL1/PRE2/PRE8/GCV2/PRE5/PRE10/CAALFM_C106390WA/CDC19/RAD23/PRE3	16	2	3636558/3646847	14	3645874/30515395/3638311/3646718/3640510/3643490/3641906/3646505/3643111/3636957/3639558/3643438/3635834/3643660
BP	GO:0006644	phospholipid metabolic process	7/462	28/1862	0.563979	0.997286	3638966/3645575/3635641/3641019/3641607/3635766/3637921	INO1/GWT1/CAALFM_C402100CA/SPT14/CAALFM_C601370WA/FAB1/CAALFM_C403130WA	7	5	3645575/3635641/3641019/3635766/3637921	2	3638966/3641607
BP	GO:0042254	ribosome biogenesis	7/462	28/1862	0.563979	0.997286	3639219/3648179/3645332/3644105/3635757/3638502/3639857	MRT4/SPB1/GAR1/PES1/UTP21/CAALFM_C306760WA/BMS1	7	0		7	3639219/3648179/3645332/3644105/3635757/3638502/3639857
BP	GO:0008104	protein localization	15/462	61/1862	0.566753	0.997286	3645373/3648085/3635688/30515262/3640407/3637844/3640587/3641898/3635662/3645870/3636860/3634800/3639326/3636817/3638515	CAALFM_C403560WA/CAALFM_C406130WA/MLP1/CAALFM_C403930CA/HSE1/CAALFM_C402460WA/IST1/PHO88/CLC1/SEC27/SEC62/VPS41/VPS27/TOM20/CAALFM_C307050WA	15	9	3645373/3648085/3635688/30515262/3637844/3640587/3635662/3634800/3638515	6	3640407/3641898/3645870/3636860/3639326/3636817
BP	GO:1901137	carbohydrate derivative biosynthetic process	15/462	62/1862	0.595491	0.997286	3638384/3641116/3644405/3645575/3634904/3635641/3641019/3641607/3643438/3645443/3638789/3636459/3635259/3637921/3634763	KRE5/PMT6/MNN2/GWT1/MNN12/CAALFM_C402100CA/SPT14/CAALFM_C601370WA/CDC19/KTR2/MNN24/CAALFM_C505130CA/ADE2/CAALFM_C403130WA/GUA1	15	8	3641116/3645575/3634904/3635641/3641019/3638789/3636459/3637921	7	3638384/3644405/3641607/3643438/3645443/3635259/3634763
BP	GO:0044267	cellular protein metabolic process	85/462	348/1862	0.597627	0.997286	3638384/3635769/3636831/3645874/3641116/3641127/3634767/3645956/3637922/3640285/3641734/30515395/3639724/3638311/3637393/3639723/3644405/3646358/3640121/3646718/3640510/3643513/3645575/3640953/3643482/3634904/3635641/3641888/3639497/3643490/3640275/3641611/3647882/3641906/3640548/3641648/3645137/30515335/3643111/3642506/3637986/3641019/3636957/3642789/3641607/3646039/3639558/3645443/3641144/36429…	KRE5/CAALFM_C202020WA/MST1/CAALFM_C602300CA/PMT6/CAALFM_C404460CA/RAM2/ILS1/BUB1/ALA1/CAM1/PRE6/MRPL6/PRE9/HOG1/CAALFM_CR00490WA/MNN2/CAM1-1/FRS1/PUP3/SCL1/CAALFM_C207190CA/GWT1/HST7/TPK2/MNN12/CAALFM_C402100CA/MPS1/MRPL19/PRE2/NAM2/PTK2/THS1/PRE8/CAALFM_C300450CA/ANB1/CAALFM_CR03400WA/RPL32/PRE5/RSM22/CAALFM_C700490CA/SPT14/PRE10/CEK1/CAALFM_C601370WA/MRPL8/CAALFM_C106390WA/KTR2/SSK2/CAALFM_C407…	85	21	3641116/3641127/3634767/3637922/3645575/3643482/3634904/3635641/3641019/3642789/3641144/3642959/3638789/3636978/3645897/3641896/3644040/3637921/3645205/3635588/3642481	64	3638384/3635769/3636831/3645874/3645956/3640285/3641734/30515395/3639724/3638311/3637393/3639723/3644405/3646358/3640121/3646718/3640510/3643513/3640953/3641888/3639497/3643490/3640275/3641611/3647882/3641906/3640548/3641648/3645137/30515335/3643111/3642506/3637986/3636957/3641607/3646039/3639558/3645443/3639317/3638029/3647903/3636516/3644055/3636398/3635834/3642501/3643424/3640128/3642643/36394…
BP	GO:0072594	establishment of protein localization to organelle	3/462	12/1862	0.604095	0.997286	3635688/30515262/3641898	MLP1/CAALFM_C403930CA/PHO88	3	2	3635688/30515262	1	3641898
BP	GO:1901135	carbohydrate derivative metabolic process	19/462	80/1862	0.632615	0.997286	3638384/3641116/3641769/3644405/3645575/3644563/3634904/3635641/3646952/3641019/3641607/3643438/3645443/3635842/3638789/3636459/3635259/3637921/3634763	KRE5/PMT6/ADE4/MNN2/GWT1/GPD2/MNN12/CAALFM_C402100CA/CAALFM_C405400CA/SPT14/CAALFM_C601370WA/CDC19/KTR2/APT1/MNN24/CAALFM_C505130CA/ADE2/CAALFM_C403130WA/GUA1	19	9	3641116/3645575/3634904/3635641/3646952/3641019/3638789/3636459/3637921	10	3638384/3641769/3644405/3644563/3641607/3643438/3645443/3635842/3635259/3634763
BP	GO:0034613	cellular protein localization	13/462	55/1862	0.633325	0.997286	3645373/3648085/3635688/30515262/3640407/3637844/3641898/3635662/3645870/3634800/3639326/3636817/3638515	CAALFM_C403560WA/CAALFM_C406130WA/MLP1/CAALFM_C403930CA/HSE1/CAALFM_C402460WA/PHO88/CLC1/SEC27/VPS41/VPS27/TOM20/CAALFM_C307050WA	13	8	3645373/3648085/3635688/30515262/3637844/3635662/3634800/3638515	5	3640407/3641898/3645870/3639326/3636817
BP	GO:0070727	cellular macromolecule localization	13/462	55/1862	0.633325	0.997286	3645373/3648085/3635688/30515262/3640407/3637844/3641898/3635662/3645870/3634800/3639326/3636817/3638515	CAALFM_C403560WA/CAALFM_C406130WA/MLP1/CAALFM_C403930CA/HSE1/CAALFM_C402460WA/PHO88/CLC1/SEC27/VPS41/VPS27/TOM20/CAALFM_C307050WA	13	8	3645373/3648085/3635688/30515262/3637844/3635662/3634800/3638515	5	3640407/3641898/3645870/3639326/3636817
BP	GO:0051188	cofactor biosynthetic process	6/462	26/1862	0.656175	0.997286	3647071/3644538/3643438/3647390/3636459/3641233	COX15/SAM2/CDC19/HEM13/CAALFM_C505130CA/CAALFM_C210860CA	6	1	3636459	5	3647071/3644538/3643438/3647390/3641233
BP	GO:0015031	protein transport	13/462	56/1862	0.661705	0.997286	3645373/3635688/30515262/3640407/3640587/3641898/3635662/3645870/3636860/3634800/3639326/3636817/3638515	CAALFM_C403560WA/MLP1/CAALFM_C403930CA/HSE1/IST1/PHO88/CLC1/SEC27/SEC62/VPS41/VPS27/TOM20/CAALFM_C307050WA	13	7	3645373/3635688/30515262/3640587/3635662/3634800/3638515	6	3640407/3641898/3645870/3636860/3639326/3636817
BP	GO:0015833	peptide transport	13/462	56/1862	0.661705	0.997286	3645373/3635688/30515262/3640407/3640587/3641898/3635662/3645870/3636860/3634800/3639326/3636817/3638515	CAALFM_C403560WA/MLP1/CAALFM_C403930CA/HSE1/IST1/PHO88/CLC1/SEC27/SEC62/VPS41/VPS27/TOM20/CAALFM_C307050WA	13	7	3645373/3635688/30515262/3640587/3635662/3634800/3638515	6	3640407/3641898/3645870/3636860/3639326/3636817
BP	GO:0042886	amide transport	13/462	56/1862	0.661705	0.997286	3645373/3635688/30515262/3640407/3640587/3641898/3635662/3645870/3636860/3634800/3639326/3636817/3638515	CAALFM_C403560WA/MLP1/CAALFM_C403930CA/HSE1/IST1/PHO88/CLC1/SEC27/SEC62/VPS41/VPS27/TOM20/CAALFM_C307050WA	13	7	3645373/3635688/30515262/3640587/3635662/3634800/3638515	6	3640407/3641898/3645870/3636860/3639326/3636817
BP	GO:0007005	mitochondrion organization	3/462	13/1862	0.662497	0.997286	3642502/3636834/30515038	CAALFM_CR05970CA/CAALFM_C102960CA/PET100	3	1	3636834	2	3642502/30515038
BP	GO:0090407	organophosphate biosynthetic process	12/462	52/1862	0.668256	0.997286	3638966/3645575/3641407/3635594/3635641/3641019/3641607/3643438/3636459/3635259/3637921/3634763	INO1/GWT1/CYR1/CAALFM_C401820CA/CAALFM_C402100CA/SPT14/CAALFM_C601370WA/CDC19/CAALFM_C505130CA/ADE2/CAALFM_C403130WA/GUA1	12	7	3645575/3641407/3635594/3635641/3641019/3636459/3637921	5	3638966/3641607/3643438/3635259/3634763
BP	GO:1901566	organonitrogen compound biosynthetic process	57/462	239/1862	0.67043	0.997286	3638384/3636649/3647071/3636831/3641116/3645956/3640285/3641734/3639724/3639723/3644405/3646358/3640121/3643513/3640719/3645575/3634904/3635641/3640084/3639497/3640275/3647882/3640548/3641648/3645137/30515335/3642506/3646827/3641019/3641607/3646039/3643438/3645443/3647390/3638029/3636516/3638789/3636459/3641233/3635259/3636398/3640128/3638333/3644116/3641813/3636501/30515301/3643176/3637954/36384…	KRE5/URA3/COX15/MST1/PMT6/ILS1/ALA1/CAM1/MRPL6/CAALFM_CR00490WA/MNN2/CAM1-1/FRS1/CAALFM_C207190CA/ADE5%2C7/GWT1/MNN12/CAALFM_C402100CA/MET6/MRPL19/NAM2/THS1/CAALFM_C300450CA/ANB1/CAALFM_CR03400WA/RPL32/RSM22/CAALFM_C112810WA/SPT14/CAALFM_C601370WA/MRPL8/CDC19/KTR2/HEM13/GUS1/MES1/MNN24/CAALFM_C505130CA/CAALFM_C210860CA/ADE2/MSM1/CDC60/THI6/SPE2/CAALFM_C405640CA/HIS1/CAALFM_C501540WA/CAALFM_CR0374…	57	13	3636649/3641116/3645575/3634904/3635641/3641019/3638789/3636459/3638333/3644116/3641813/3636501/3637921	44	3638384/3647071/3636831/3645956/3640285/3641734/3639724/3639723/3644405/3646358/3640121/3643513/3640719/3640084/3639497/3640275/3647882/3640548/3641648/3645137/30515335/3642506/3646827/3641607/3646039/3643438/3645443/3647390/3638029/3636516/3641233/3635259/3636398/3640128/30515301/3643176/3637954/3638486/3643347/30515338/3640303/3646057/3640232/3634763
BP	GO:0072522	purine-containing compound biosynthetic process	5/462	22/1862	0.670483	0.997286	3640719/3643438/3636459/3635259/3634763	ADE5%2C7/CDC19/CAALFM_C505130CA/ADE2/GUA1	5	1	3636459	4	3640719/3643438/3635259/3634763
BP	GO:0006629	lipid metabolic process	19/462	82/1862	0.679641	0.997286	3638966/3644053/3634888/3636558/3635862/3642962/3645575/3635641/3636655/3635792/3641019/3641607/3634797/3639356/3645786/3635766/3646982/3637921/3641881	INO1/FAD2/LIP1/PXP2/FGR22/YDC1/GWT1/CAALFM_C402100CA/ERG6/CAALFM_C201920CA/SPT14/CAALFM_C601370WA/LIP3/LRO1/DFG10/FAB1/BTS1/CAALFM_C403130WA/ERG13	19	12	3634888/3636558/3635862/3642962/3645575/3635641/3641019/3634797/3639356/3645786/3635766/3637921	7	3638966/3644053/3636655/3635792/3641607/3646982/3641881
BP	GO:0035556	intracellular signal transduction	7/462	31/1862	0.681562	0.997286	3646953/3637434/3641407/3643737/3635220/3644788/3643298	TSC2/ROM2/CYR1/CDC24/SEC7/TCO89/GDI1	7	3	3646953/3641407/3635220	4	3637434/3643737/3644788/3643298
BP	GO:0046907	intracellular transport	14/462	61/1862	0.682285	0.997286	3645373/3635688/30515262/3640407/3641898/3635662/3645870/3634800/3639326/3647413/3645794/3640214/3636817/3638515	CAALFM_C403560WA/MLP1/CAALFM_C403930CA/HSE1/PHO88/CLC1/SEC27/VPS41/VPS27/CAALFM_C405180CA/VPS28/TRS20/TOM20/CAALFM_C307050WA	14	7	3645373/3635688/30515262/3635662/3634800/3647413/3638515	7	3640407/3641898/3645870/3639326/3645794/3640214/3636817
BP	GO:0009152	purine ribonucleotide biosynthetic process	4/462	18/1862	0.689	0.997286	3643438/3636459/3635259/3634763	CDC19/CAALFM_C505130CA/ADE2/GUA1	4	1	3636459	3	3643438/3635259/3634763
BP	GO:0009260	ribonucleotide biosynthetic process	4/462	18/1862	0.689	0.997286	3643438/3636459/3635259/3634763	CDC19/CAALFM_C505130CA/ADE2/GUA1	4	1	3636459	3	3643438/3635259/3634763
BP	GO:0046390	ribose phosphate biosynthetic process	4/462	18/1862	0.689	0.997286	3643438/3636459/3635259/3634763	CDC19/CAALFM_C505130CA/ADE2/GUA1	4	1	3636459	3	3643438/3635259/3634763
BP	GO:0006412	translation	30/462	129/1862	0.697935	0.997286	3636831/3645956/3640285/3641734/3639724/3639723/3646358/3640121/3643513/3639497/3640275/3647882/3640548/3641648/3645137/30515335/3642506/3646039/3638029/3636516/3636398/3640128/30515301/3637954/3638486/3643347/30515338/3640303/3646057/3640232	MST1/ILS1/ALA1/CAM1/MRPL6/CAALFM_CR00490WA/CAM1-1/FRS1/CAALFM_C207190CA/MRPL19/NAM2/THS1/CAALFM_C300450CA/ANB1/CAALFM_CR03400WA/RPL32/RSM22/MRPL8/GUS1/MES1/MSM1/CDC60/CAALFM_C501540WA/YML6/KRS1/RPL4B/RPL25/CAALFM_C603730CA/CAALFM_CR07320CA/CAALFM_C101530CA	30	0		30	3636831/3645956/3640285/3641734/3639724/3639723/3646358/3640121/3643513/3639497/3640275/3647882/3640548/3641648/3645137/30515335/3642506/3646039/3638029/3636516/3636398/3640128/30515301/3637954/3638486/3643347/30515338/3640303/3646057/3640232
BP	GO:0017144	drug metabolic process	8/462	36/1862	0.703583	0.997286	3646847/3644538/3646505/3646827/3643438/3638333/3644116/3643176	CAALFM_C404270WA/SAM2/GCV2/CAALFM_C112810WA/CDC19/THI6/SPE2/CAALFM_CR03740CA	8	3	3646847/3638333/3644116	5	3644538/3646505/3646827/3643438/3643176
BP	GO:0006281	DNA repair	10/462	45/1862	0.712982	0.997286	3638917/3645324/3642939/3637887/3637913/3647757/3635834/3646519/3647134/3637896	CAALFM_CR10180WA/CAS1/MSH2/CAALFM_C403290WA/CAALFM_C402590CA/CAALFM_C300830CA/RAD23/CAALFM_C406020CA/CAALFM_C600640CA/CAALFM_C402820WA	10	8	3638917/3645324/3642939/3637887/3637913/3646519/3647134/3637896	2	3647757/3635834
BP	GO:0006790	sulfur compound metabolic process	3/462	14/1862	0.714384	0.997286	3644538/3640084/3638333	SAM2/MET6/THI6	3	1	3638333	2	3644538/3640084
BP	GO:0032259	methylation	3/462	14/1862	0.714384	0.997286	3648179/3637986/3644055	SPB1/CAALFM_C700490CA/CAALFM_C601130WA	3	0		3	3648179/3637986/3644055
BP	GO:0045184	establishment of protein localization	13/462	58/1862	0.714671	0.997286	3645373/3635688/30515262/3640407/3640587/3641898/3635662/3645870/3636860/3634800/3639326/3636817/3638515	CAALFM_C403560WA/MLP1/CAALFM_C403930CA/HSE1/IST1/PHO88/CLC1/SEC27/SEC62/VPS41/VPS27/TOM20/CAALFM_C307050WA	13	7	3645373/3635688/30515262/3640587/3635662/3634800/3638515	6	3640407/3641898/3645870/3636860/3639326/3636817
BP	GO:0043043	peptide biosynthetic process	30/462	130/1862	0.715573	0.997286	3636831/3645956/3640285/3641734/3639724/3639723/3646358/3640121/3643513/3639497/3640275/3647882/3640548/3641648/3645137/30515335/3642506/3646039/3638029/3636516/3636398/3640128/30515301/3637954/3638486/3643347/30515338/3640303/3646057/3640232	MST1/ILS1/ALA1/CAM1/MRPL6/CAALFM_CR00490WA/CAM1-1/FRS1/CAALFM_C207190CA/MRPL19/NAM2/THS1/CAALFM_C300450CA/ANB1/CAALFM_CR03400WA/RPL32/RSM22/MRPL8/GUS1/MES1/MSM1/CDC60/CAALFM_C501540WA/YML6/KRS1/RPL4B/RPL25/CAALFM_C603730CA/CAALFM_CR07320CA/CAALFM_C101530CA	30	0		30	3636831/3645956/3640285/3641734/3639724/3639723/3646358/3640121/3643513/3639497/3640275/3647882/3640548/3641648/3645137/30515335/3642506/3646039/3638029/3636516/3636398/3640128/30515301/3637954/3638486/3643347/30515338/3640303/3646057/3640232
BP	GO:0006886	intracellular protein transport	11/462	50/1862	0.730972	0.997286	3645373/3635688/30515262/3640407/3641898/3635662/3645870/3634800/3639326/3636817/3638515	CAALFM_C403560WA/MLP1/CAALFM_C403930CA/HSE1/PHO88/CLC1/SEC27/VPS41/VPS27/TOM20/CAALFM_C307050WA	11	6	3645373/3635688/30515262/3635662/3634800/3638515	5	3640407/3641898/3645870/3639326/3636817
BP	GO:0051649	establishment of localization in cell	14/462	63/1862	0.731658	0.997286	3645373/3635688/30515262/3640407/3641898/3635662/3645870/3634800/3639326/3647413/3645794/3640214/3636817/3638515	CAALFM_C403560WA/MLP1/CAALFM_C403930CA/HSE1/PHO88/CLC1/SEC27/VPS41/VPS27/CAALFM_C405180CA/VPS28/TRS20/TOM20/CAALFM_C307050WA	14	7	3645373/3635688/30515262/3635662/3634800/3647413/3638515	7	3640407/3641898/3645870/3639326/3645794/3640214/3636817
BP	GO:0071705	nitrogen compound transport	14/462	63/1862	0.731658	0.997286	3642793/3645373/3635688/30515262/3640407/3640587/3641898/3635662/3645870/3636860/3634800/3639326/3636817/3638515	CAALFM_C406440CA/CAALFM_C403560WA/MLP1/CAALFM_C403930CA/HSE1/IST1/PHO88/CLC1/SEC27/SEC62/VPS41/VPS27/TOM20/CAALFM_C307050WA	14	8	3642793/3645373/3635688/30515262/3640587/3635662/3634800/3638515	6	3640407/3641898/3645870/3636860/3639326/3636817
BP	GO:0051276	chromosome organization	10/462	46/1862	0.740472	0.997286	3645874/3638037/3638917/3639714/3644034/30515358/3644120/3642959/3641896/3641815	CAALFM_C602300CA/DCC1/CAALFM_CR10180WA/NAP1/TOP1/HHO1/CTF8/CAALFM_C407210WA/CAALFM_CR09490WA/BRN1	10	6	3638037/3638917/30515358/3642959/3641896/3641815	4	3645874/3639714/3644034/3644120
BP	GO:0043412	macromolecule modification	49/462	211/1862	0.740781	0.997286	3638384/3635769/3641116/3641127/3634767/3637922/3637393/3644405/3645575/3640953/3643482/3634904/3635641/3641888/3641611/3645332/3635677/3637986/3641019/3642789/3641607/3645443/3641144/3642959/3639317/3647903/3638789/3644055/3636978/3645881/3645897/3642501/3643424/3641896/3642927/3642643/3644040/3639498/3636643/3643337/3637921/3647682/3641237/3645205/3635588/3642481/3644399/3646075/3641199	KRE5/CAALFM_C202020WA/PMT6/CAALFM_C404460CA/RAM2/BUB1/HOG1/MNN2/GWT1/HST7/TPK2/MNN12/CAALFM_C402100CA/MPS1/PTK2/GAR1/CAALFM_C400940WA/CAALFM_C700490CA/SPT14/CEK1/CAALFM_C601370WA/KTR2/SSK2/CAALFM_C407210WA/UBP6/CAALFM_C600170CA/MNN24/CAALFM_C601130WA/CYP1/CAALFM_C602350CA/GCN2/CAALFM_CR05980WA/CDC7/CAALFM_CR09490WA/CAALFM_C406950WA/SNF1/VPS15/NPR1/CAALFM_C302180CA/DOA4/CAALFM_C403130WA/CAALFM_C11…	49	23	3641116/3641127/3634767/3637922/3645575/3643482/3634904/3635641/3635677/3641019/3642789/3641144/3642959/3638789/3636978/3645897/3641896/3642927/3644040/3637921/3645205/3635588/3642481	26	3638384/3635769/3637393/3644405/3640953/3641888/3641611/3645332/3637986/3641607/3645443/3639317/3647903/3644055/3645881/3642501/3643424/3642643/3639498/3636643/3643337/3647682/3641237/3644399/3646075/3641199
BP	GO:0034404	nucleobase-containing small molecule biosynthetic process	2/462	10/1862	0.752471	0.997286	3643438/3634763	CDC19/GUA1	2	0		2	3643438/3634763
BP	GO:0051246	regulation of protein metabolic process	2/462	10/1862	0.752471	0.997286	3641648/3636917	ANB1/RPN3	2	0		2	3641648/3636917
BP	GO:0006950	response to stress	13/462	60/1862	0.762186	0.997286	3638917/3645324/3638350/3642939/3637887/3643511/3644010/3637913/3647757/3635834/3646519/3647134/3637896	CAALFM_CR10180WA/CAS1/CCP1/MSH2/CAALFM_C403290WA/AFT2/CAALFM_C600850WA/CAALFM_C402590CA/CAALFM_C300830CA/RAD23/CAALFM_C406020CA/CAALFM_C600640CA/CAALFM_C402820WA	13	9	3638917/3645324/3638350/3642939/3637887/3637913/3646519/3647134/3637896	4	3643511/3644010/3647757/3635834
BP	GO:0006486	protein glycosylation	6/462	29/1862	0.763244	0.997286	3638384/3641116/3644405/3634904/3645443/3638789	KRE5/PMT6/MNN2/MNN12/KTR2/MNN24	6	3	3641116/3634904/3638789	3	3638384/3644405/3645443
BP	GO:0009100	glycoprotein metabolic process	6/462	29/1862	0.763244	0.997286	3638384/3641116/3644405/3634904/3645443/3638789	KRE5/PMT6/MNN2/MNN12/KTR2/MNN24	6	3	3641116/3634904/3638789	3	3638384/3644405/3645443
BP	GO:0009101	glycoprotein biosynthetic process	6/462	29/1862	0.763244	0.997286	3638384/3641116/3644405/3634904/3645443/3638789	KRE5/PMT6/MNN2/MNN12/KTR2/MNN24	6	3	3641116/3634904/3638789	3	3638384/3644405/3645443
BP	GO:0043413	macromolecule glycosylation	6/462	29/1862	0.763244	0.997286	3638384/3641116/3644405/3634904/3645443/3638789	KRE5/PMT6/MNN2/MNN12/KTR2/MNN24	6	3	3641116/3634904/3638789	3	3638384/3644405/3645443
BP	GO:0006518	peptide metabolic process	30/462	133/1862	0.764826	0.997286	3636831/3645956/3640285/3641734/3639724/3639723/3646358/3640121/3643513/3639497/3640275/3647882/3640548/3641648/3645137/30515335/3642506/3646039/3638029/3636516/3636398/3640128/30515301/3637954/3638486/3643347/30515338/3640303/3646057/3640232	MST1/ILS1/ALA1/CAM1/MRPL6/CAALFM_CR00490WA/CAM1-1/FRS1/CAALFM_C207190CA/MRPL19/NAM2/THS1/CAALFM_C300450CA/ANB1/CAALFM_CR03400WA/RPL32/RSM22/MRPL8/GUS1/MES1/MSM1/CDC60/CAALFM_C501540WA/YML6/KRS1/RPL4B/RPL25/CAALFM_C603730CA/CAALFM_CR07320CA/CAALFM_C101530CA	30	0		30	3636831/3645956/3640285/3641734/3639724/3639723/3646358/3640121/3643513/3639497/3640275/3647882/3640548/3641648/3645137/30515335/3642506/3646039/3638029/3636516/3636398/3640128/30515301/3637954/3638486/3643347/30515338/3640303/3646057/3640232
BP	GO:0006164	purine nucleotide biosynthetic process	4/462	20/1862	0.770518	0.997286	3643438/3636459/3635259/3634763	CDC19/CAALFM_C505130CA/ADE2/GUA1	4	1	3636459	3	3643438/3635259/3634763
BP	GO:0043603	cellular amide metabolic process	32/462	142/1862	0.772849	0.997286	3636831/3645956/3640285/3641734/3639724/3639723/3646847/3646358/3640121/3643513/3642962/3639497/3640275/3647882/3640548/3641648/3645137/30515335/3642506/3646039/3638029/3636516/3636398/3640128/30515301/3637954/3638486/3643347/30515338/3640303/3646057/3640232	MST1/ILS1/ALA1/CAM1/MRPL6/CAALFM_CR00490WA/CAALFM_C404270WA/CAM1-1/FRS1/CAALFM_C207190CA/YDC1/MRPL19/NAM2/THS1/CAALFM_C300450CA/ANB1/CAALFM_CR03400WA/RPL32/RSM22/MRPL8/GUS1/MES1/MSM1/CDC60/CAALFM_C501540WA/YML6/KRS1/RPL4B/RPL25/CAALFM_C603730CA/CAALFM_CR07320CA/CAALFM_C101530CA	32	2	3646847/3642962	30	3636831/3645956/3640285/3641734/3639724/3639723/3646358/3640121/3643513/3639497/3640275/3647882/3640548/3641648/3645137/30515335/3642506/3646039/3638029/3636516/3636398/3640128/30515301/3637954/3638486/3643347/30515338/3640303/3646057/3640232
BP	GO:0009165	nucleotide biosynthetic process	6/462	30/1862	0.792887	0.997286	3641407/3635594/3643438/3636459/3635259/3634763	CYR1/CAALFM_C401820CA/CDC19/CAALFM_C505130CA/ADE2/GUA1	6	3	3641407/3635594/3636459	3	3643438/3635259/3634763
BP	GO:0070085	glycosylation	6/462	30/1862	0.792887	0.997286	3638384/3641116/3644405/3634904/3645443/3638789	KRE5/PMT6/MNN2/MNN12/KTR2/MNN24	6	3	3641116/3634904/3638789	3	3638384/3644405/3645443
BP	GO:1901293	nucleoside phosphate biosynthetic process	6/462	30/1862	0.792887	0.997286	3641407/3635594/3643438/3636459/3635259/3634763	CYR1/CAALFM_C401820CA/CDC19/CAALFM_C505130CA/ADE2/GUA1	6	3	3641407/3635594/3636459	3	3643438/3635259/3634763
BP	GO:0006464	cellular protein modification process	43/462	190/1862	0.793623	0.997286	3638384/3635769/3641116/3641127/3634767/3637922/3637393/3644405/3645575/3640953/3643482/3634904/3635641/3641888/3641611/3637986/3641019/3642789/3641607/3645443/3641144/3642959/3639317/3647903/3638789/3644055/3636978/3645897/3642501/3643424/3641896/3642643/3644040/3639498/3636643/3643337/3637921/3641237/3645205/3635588/3642481/3646075/3641199	KRE5/CAALFM_C202020WA/PMT6/CAALFM_C404460CA/RAM2/BUB1/HOG1/MNN2/GWT1/HST7/TPK2/MNN12/CAALFM_C402100CA/MPS1/PTK2/CAALFM_C700490CA/SPT14/CEK1/CAALFM_C601370WA/KTR2/SSK2/CAALFM_C407210WA/UBP6/CAALFM_C600170CA/MNN24/CAALFM_C601130WA/CYP1/GCN2/CAALFM_CR05980WA/CDC7/CAALFM_CR09490WA/SNF1/VPS15/NPR1/CAALFM_C302180CA/DOA4/CAALFM_C403130WA/AKL1/CAALFM_C207530CA/CAALFM_C401730CA/CAALFM_C105370CA/PKH3/KIN3	43	21	3641116/3641127/3634767/3637922/3645575/3643482/3634904/3635641/3641019/3642789/3641144/3642959/3638789/3636978/3645897/3641896/3644040/3637921/3645205/3635588/3642481	22	3638384/3635769/3637393/3644405/3640953/3641888/3641611/3637986/3641607/3645443/3639317/3647903/3644055/3642501/3643424/3642643/3639498/3636643/3643337/3641237/3646075/3641199
BP	GO:0036211	protein modification process	43/462	190/1862	0.793623	0.997286	3638384/3635769/3641116/3641127/3634767/3637922/3637393/3644405/3645575/3640953/3643482/3634904/3635641/3641888/3641611/3637986/3641019/3642789/3641607/3645443/3641144/3642959/3639317/3647903/3638789/3644055/3636978/3645897/3642501/3643424/3641896/3642643/3644040/3639498/3636643/3643337/3637921/3641237/3645205/3635588/3642481/3646075/3641199	KRE5/CAALFM_C202020WA/PMT6/CAALFM_C404460CA/RAM2/BUB1/HOG1/MNN2/GWT1/HST7/TPK2/MNN12/CAALFM_C402100CA/MPS1/PTK2/CAALFM_C700490CA/SPT14/CEK1/CAALFM_C601370WA/KTR2/SSK2/CAALFM_C407210WA/UBP6/CAALFM_C600170CA/MNN24/CAALFM_C601130WA/CYP1/GCN2/CAALFM_CR05980WA/CDC7/CAALFM_CR09490WA/SNF1/VPS15/NPR1/CAALFM_C302180CA/DOA4/CAALFM_C403130WA/AKL1/CAALFM_C207530CA/CAALFM_C401730CA/CAALFM_C105370CA/PKH3/KIN3	43	21	3641116/3641127/3634767/3637922/3645575/3643482/3634904/3635641/3641019/3642789/3641144/3642959/3638789/3636978/3645897/3641896/3644040/3637921/3645205/3635588/3642481	22	3638384/3635769/3637393/3644405/3640953/3641888/3641611/3637986/3641607/3645443/3639317/3647903/3644055/3642501/3643424/3642643/3639498/3636643/3643337/3641237/3646075/3641199
BP	GO:0006352	DNA-templated transcription, initiation	3/462	16/1862	0.799337	0.997286	3645198/3637926/3642252	TAF4/CAALFM_C403090WA/TAF60	3	3	3645198/3637926/3642252	0
BP	GO:0006364	rRNA processing	3/462	16/1862	0.799337	0.997286	3648179/3635757/3638502	SPB1/UTP21/CAALFM_C306760WA	3	0		3	3648179/3635757/3638502
BP	GO:0009124	nucleoside monophosphate biosynthetic process	3/462	16/1862	0.799337	0.997286	3643438/3635259/3634763	CDC19/ADE2/GUA1	3	0		3	3643438/3635259/3634763
BP	GO:0009127	purine nucleoside monophosphate biosynthetic process	3/462	16/1862	0.799337	0.997286	3643438/3635259/3634763	CDC19/ADE2/GUA1	3	0		3	3643438/3635259/3634763
BP	GO:0009156	ribonucleoside monophosphate biosynthetic process	3/462	16/1862	0.799337	0.997286	3643438/3635259/3634763	CDC19/ADE2/GUA1	3	0		3	3643438/3635259/3634763
BP	GO:0009168	purine ribonucleoside monophosphate biosynthetic process	3/462	16/1862	0.799337	0.997286	3643438/3635259/3634763	CDC19/ADE2/GUA1	3	0		3	3643438/3635259/3634763
BP	GO:0016072	rRNA metabolic process	3/462	16/1862	0.799337	0.997286	3648179/3635757/3638502	SPB1/UTP21/CAALFM_C306760WA	3	0		3	3648179/3635757/3638502
BP	GO:0018193	peptidyl-amino acid modification	3/462	16/1862	0.799337	0.997286	3642959/3636978/3636643	CAALFM_C407210WA/CYP1/CAALFM_C302180CA	3	2	3642959/3636978	1	3636643
BP	GO:1901607	alpha-amino acid biosynthetic process	3/462	16/1862	0.799337	0.997286	3640084/3641813/3636501	MET6/CAALFM_C405640CA/HIS1	3	2	3641813/3636501	1	3640084
BP	GO:0007010	cytoskeleton organization	2/462	11/1862	0.799828	0.997286	3635665/3646043	CAALFM_C401950WA/ARC15	2	2	3635665/3646043	0
BP	GO:0033554	cellular response to stress	11/462	53/1862	0.801794	0.997286	3638917/3645324/3642939/3637887/3643511/3637913/3647757/3635834/3646519/3647134/3637896	CAALFM_CR10180WA/CAS1/MSH2/CAALFM_C403290WA/AFT2/CAALFM_C402590CA/CAALFM_C300830CA/RAD23/CAALFM_C406020CA/CAALFM_C600640CA/CAALFM_C402820WA	11	8	3638917/3645324/3642939/3637887/3637913/3646519/3647134/3637896	3	3643511/3647757/3635834
BP	GO:0043604	amide biosynthetic process	30/462	136/1862	0.808321	0.997286	3636831/3645956/3640285/3641734/3639724/3639723/3646358/3640121/3643513/3639497/3640275/3647882/3640548/3641648/3645137/30515335/3642506/3646039/3638029/3636516/3636398/3640128/30515301/3637954/3638486/3643347/30515338/3640303/3646057/3640232	MST1/ILS1/ALA1/CAM1/MRPL6/CAALFM_CR00490WA/CAM1-1/FRS1/CAALFM_C207190CA/MRPL19/NAM2/THS1/CAALFM_C300450CA/ANB1/CAALFM_CR03400WA/RPL32/RSM22/MRPL8/GUS1/MES1/MSM1/CDC60/CAALFM_C501540WA/YML6/KRS1/RPL4B/RPL25/CAALFM_C603730CA/CAALFM_CR07320CA/CAALFM_C101530CA	30	0		30	3636831/3645956/3640285/3641734/3639724/3639723/3646358/3640121/3643513/3639497/3640275/3647882/3640548/3641648/3645137/30515335/3642506/3646039/3638029/3636516/3636398/3640128/30515301/3637954/3638486/3643347/30515338/3640303/3646057/3640232
BP	GO:0006974	cellular response to DNA damage stimulus	10/462	50/1862	0.83228	0.997286	3638917/3645324/3642939/3637887/3637913/3647757/3635834/3646519/3647134/3637896	CAALFM_CR10180WA/CAS1/MSH2/CAALFM_C403290WA/CAALFM_C402590CA/CAALFM_C300830CA/RAD23/CAALFM_C406020CA/CAALFM_C600640CA/CAALFM_C402820WA	10	8	3638917/3645324/3642939/3637887/3637913/3646519/3647134/3637896	2	3647757/3635834
BP	GO:0055086	nucleobase-containing small molecule metabolic process	10/462	50/1862	0.83228	0.997286	3636649/3641769/3640719/3641407/3635594/3643438/3635842/3636459/3635259/3634763	URA3/ADE4/ADE5%2C7/CYR1/CAALFM_C401820CA/CDC19/APT1/CAALFM_C505130CA/ADE2/GUA1	10	4	3636649/3641407/3635594/3636459	6	3641769/3640719/3643438/3635842/3635259/3634763
BP	GO:1901605	alpha-amino acid metabolic process	4/462	22/1862	0.83428	0.997286	3640084/3646505/3641813/3636501	MET6/GCV2/CAALFM_C405640CA/HIS1	4	2	3641813/3636501	2	3640084/3646505
BP	GO:0016569	covalent chromatin modification	2/462	12/1862	0.838974	0.997286	3642959/3641896	CAALFM_C407210WA/CAALFM_CR09490WA	2	2	3642959/3641896	0
BP	GO:0016570	histone modification	2/462	12/1862	0.838974	0.997286	3642959/3641896	CAALFM_C407210WA/CAALFM_CR09490WA	2	2	3642959/3641896	0
BP	GO:0006325	chromatin organization	4/462	23/1862	0.86018	0.997286	3639714/30515358/3642959/3641896	NAP1/HHO1/CAALFM_C407210WA/CAALFM_CR09490WA	4	3	30515358/3642959/3641896	1	3639714
BP	GO:0030001	metal ion transport	5/462	28/1862	0.861642	0.997286	3639546/3635861/3635609/3647077/3639861	HAK1/ZRT2/CAALFM_C400990WA/CTR1/PHO87	5	4	3639546/3635861/3635609/3639861	1	3647077
BP	GO:0072521	purine-containing compound metabolic process	5/462	28/1862	0.861642	0.997286	3640719/3643438/3636459/3635259/3634763	ADE5%2C7/CDC19/CAALFM_C505130CA/ADE2/GUA1	5	1	3636459	4	3640719/3643438/3635259/3634763
BP	GO:0044283	small molecule biosynthetic process	9/462	47/1862	0.861672	0.997286	3638966/3640084/3646827/3643438/3638333/3641813/3636501/3643176/3634763	INO1/MET6/CAALFM_C112810WA/CDC19/THI6/CAALFM_C405640CA/HIS1/CAALFM_CR03740CA/GUA1	9	3	3638333/3641813/3636501	6	3638966/3640084/3646827/3643438/3643176/3634763
BP	GO:0006397	mRNA processing	3/462	18/1862	0.862057	0.997286	3642929/3641808/3645129	EXM2/CGT1/SSU72	3	2	3642929/3641808	1	3645129
BP	GO:0006091	generation of precursor metabolites and energy	2/462	13/1862	0.871061	0.997286	3643438/3640435	CDC19/GSY1	2	0		2	3643438/3640435
BP	GO:0009150	purine ribonucleotide metabolic process	4/462	24/1862	0.882547	0.997286	3643438/3636459/3635259/3634763	CDC19/CAALFM_C505130CA/ADE2/GUA1	4	1	3636459	3	3643438/3635259/3634763
BP	GO:0009259	ribonucleotide metabolic process	4/462	24/1862	0.882547	0.997286	3643438/3636459/3635259/3634763	CDC19/CAALFM_C505130CA/ADE2/GUA1	4	1	3636459	3	3643438/3635259/3634763
BP	GO:0008652	cellular amino acid biosynthetic process	3/462	19/1862	0.886429	0.997286	3640084/3641813/3636501	MET6/CAALFM_C405640CA/HIS1	3	2	3641813/3636501	1	3640084
BP	GO:0016042	lipid catabolic process	3/462	19/1862	0.886429	0.997286	3634888/3636558/3634797	LIP1/PXP2/LIP3	3	3	3634888/3636558/3634797	0
BP	GO:0032787	monocarboxylic acid metabolic process	2/462	14/1862	0.897174	0.997286	3636558/3643438	PXP2/CDC19	2	1	3636558	1	3643438
BP	GO:0009123	nucleoside monophosphate metabolic process	3/462	20/1862	0.906884	0.997286	3643438/3635259/3634763	CDC19/ADE2/GUA1	3	0		3	3643438/3635259/3634763
BP	GO:0009126	purine nucleoside monophosphate metabolic process	3/462	20/1862	0.906884	0.997286	3643438/3635259/3634763	CDC19/ADE2/GUA1	3	0		3	3643438/3635259/3634763
BP	GO:0009161	ribonucleoside monophosphate metabolic process	3/462	20/1862	0.906884	0.997286	3643438/3635259/3634763	CDC19/ADE2/GUA1	3	0		3	3643438/3635259/3634763
BP	GO:0009167	purine ribonucleoside monophosphate metabolic process	3/462	20/1862	0.906884	0.997286	3643438/3635259/3634763	CDC19/ADE2/GUA1	3	0		3	3643438/3635259/3634763
BP	GO:0006163	purine nucleotide metabolic process	4/462	26/1862	0.918112	0.997286	3643438/3636459/3635259/3634763	CDC19/CAALFM_C505130CA/ADE2/GUA1	4	1	3636459	3	3643438/3635259/3634763
BP	GO:0019693	ribose phosphate metabolic process	4/462	26/1862	0.918112	0.997286	3643438/3636459/3635259/3634763	CDC19/CAALFM_C505130CA/ADE2/GUA1	4	1	3636459	3	3643438/3635259/3634763
BP	GO:0008380	RNA splicing	2/462	15/1862	0.918296	0.997286	3642929/3638903	EXM2/CAALFM_C200200WA	2	2	3642929/3638903	0
BP	GO:0007154	cell communication	9/462	51/1862	0.918385	0.997286	3646953/3637434/3641407/3643737/3643511/3635220/3635661/3644788/3643298	TSC2/ROM2/CYR1/CDC24/AFT2/SEC7/RGA2/TCO89/GDI1	9	4	3646953/3641407/3635220/3635661	5	3637434/3643737/3643511/3644788/3643298
BP	GO:0019637	organophosphate metabolic process	14/462	75/1862	0.921966	0.997286	3638966/3645575/3641407/3635594/3644563/3635641/3641019/3641607/3643438/3636459/3635259/3635766/3637921/3634763	INO1/GWT1/CYR1/CAALFM_C401820CA/GPD2/CAALFM_C402100CA/SPT14/CAALFM_C601370WA/CDC19/CAALFM_C505130CA/ADE2/FAB1/CAALFM_C403130WA/GUA1	14	8	3645575/3641407/3635594/3635641/3641019/3636459/3635766/3637921	6	3638966/3644563/3641607/3643438/3635259/3634763
BP	GO:0009108	coenzyme biosynthetic process	3/462	21/1862	0.923948	0.997286	3644538/3643438/3636459	SAM2/CDC19/CAALFM_C505130CA	3	1	3636459	2	3644538/3643438
BP	GO:0016071	mRNA metabolic process	3/462	21/1862	0.923948	0.997286	3642929/3641808/3645129	EXM2/CGT1/SSU72	3	2	3642929/3641808	1	3645129
BP	GO:0071840	cellular component organization or biogenesis	26/462	130/1862	0.925118	0.997286	3645874/3642502/3639219/3638037/3638917/3648179/3636834/30515038/3639714/3644034/3645332/3641648/3642929/30515358/3644120/3635665/3642959/3646043/3644105/3638433/3641896/3647897/3635757/3641815/3638502/3639857	CAALFM_C602300CA/CAALFM_CR05970CA/MRT4/DCC1/CAALFM_CR10180WA/SPB1/CAALFM_C102960CA/PET100/NAP1/TOP1/GAR1/ANB1/EXM2/HHO1/CTF8/CAALFM_C401950WA/CAALFM_C407210WA/ARC15/PES1/ECM29/CAALFM_CR09490WA/HET1/UTP21/BRN1/CAALFM_C306760WA/BMS1	26	10	3638037/3638917/3636834/3642929/30515358/3635665/3642959/3646043/3641896/3641815	16	3645874/3642502/3639219/3648179/30515038/3639714/3644034/3645332/3641648/3644120/3644105/3638433/3647897/3635757/3638502/3639857
BP	GO:0051186	cofactor metabolic process	6/462	37/1862	0.927373	0.997286	3647071/3644538/3643438/3647390/3636459/3641233	COX15/SAM2/CDC19/HEM13/CAALFM_C505130CA/CAALFM_C210860CA	6	1	3636459	5	3647071/3644538/3643438/3647390/3641233
BP	GO:0006468	protein phosphorylation	19/462	99/1862	0.929703	0.997286	3641127/3637922/3637393/3640953/3643482/3641888/3641611/3642789/3641144/3645897/3643424/3642643/3644040/3639498/3641237/3645205/3642481/3646075/3641199	CAALFM_C404460CA/BUB1/HOG1/HST7/TPK2/MPS1/PTK2/CEK1/SSK2/GCN2/CDC7/SNF1/VPS15/NPR1/AKL1/CAALFM_C207530CA/CAALFM_C105370CA/PKH3/KIN3	19	9	3641127/3637922/3643482/3642789/3641144/3645897/3644040/3645205/3642481	10	3637393/3640953/3641888/3641611/3643424/3642643/3639498/3641237/3646075/3641199
BP	GO:0015672	monovalent inorganic cation transport	4/462	27/1862	0.932003	0.997286	3639546/3640111/3639861/30515402	HAK1/VMA4/PHO87/VMA13	4	4	3639546/3640111/3639861/30515402	0
BP	GO:0006996	organelle organization	15/462	81/1862	0.933317	0.997286	3645874/3642502/3638037/3638917/3636834/30515038/3639714/3644034/30515358/3644120/3635665/3642959/3646043/3641896/3641815	CAALFM_C602300CA/CAALFM_CR05970CA/DCC1/CAALFM_CR10180WA/CAALFM_C102960CA/PET100/NAP1/TOP1/HHO1/CTF8/CAALFM_C401950WA/CAALFM_C407210WA/ARC15/CAALFM_CR09490WA/BRN1	15	9	3638037/3638917/3636834/30515358/3635665/3642959/3646043/3641896/3641815	6	3645874/3642502/30515038/3639714/3644034/3644120
BP	GO:0046434	organophosphate catabolic process	2/462	16/1862	0.93529	0.997286	3644563/3643438	GPD2/CDC19	2	0		2	3644563/3643438
BP	GO:0050896	response to stimulus	22/462	114/1862	0.938705	0.997286	3646953/3638917/3637434/3645324/3638350/3642939/3641407/3637887/3638865/3643737/3643511/3644010/3637913/3635220/3647757/3635834/3646519/3635661/3647134/3637896/3644788/3643298	TSC2/CAALFM_CR10180WA/ROM2/CAS1/CCP1/MSH2/CYR1/CAALFM_C403290WA/CAALFM_C200540WA/CDC24/AFT2/CAALFM_C600850WA/CAALFM_C402590CA/SEC7/CAALFM_C300830CA/RAD23/CAALFM_C406020CA/RGA2/CAALFM_C600640CA/CAALFM_C402820WA/TCO89/GDI1	22	13	3646953/3638917/3645324/3638350/3642939/3641407/3637887/3637913/3635220/3646519/3635661/3647134/3637896	9	3637434/3638865/3643737/3643511/3644010/3647757/3635834/3644788/3643298
BP	GO:0009889	regulation of biosynthetic process	34/462	168/1862	0.939729	0.997286	30515250/3639333/3635694/3645095/3635666/3642498/3635631/3634894/3641128/3635729/3639254/3637727/3634775/3640512/3641886/3641648/3648211/3644103/3637862/3643511/3637776/3637418/3635845/3646859/3647134/3640745/3643755/3641916/3641794/3641244/3637918/3639245/3638515/3639303	MED20/UGA32/ZCF25/CAALFM_CR03330WA/ZCF26/SFL1/ZCF27/LYS143/SRB8/HAP42/POL5/ZCF22/ARG81/LYS144/UGA33/ANB1/MED5/MED18/ARG83/AFT2/CTA7/MED1/SRB9/SOH1/CAALFM_C600640CA/CAT8/TAC1/SUC1/GAT1/GAL4/UME7/CAALFM_C602790CA/CAALFM_C307050WA/RCA1	34	20	30515250/3639333/3635694/3635666/3635631/3641128/3637727/3640512/3648211/3644103/3637862/3637418/3635845/3646859/3647134/3640745/3641794/3641244/3637918/3638515	14	3645095/3642498/3634894/3635729/3639254/3634775/3641886/3641648/3643511/3637776/3643755/3641916/3639245/3639303
BP	GO:0010556	regulation of macromolecule biosynthetic process	34/462	168/1862	0.939729	0.997286	30515250/3639333/3635694/3645095/3635666/3642498/3635631/3634894/3641128/3635729/3639254/3637727/3634775/3640512/3641886/3641648/3648211/3644103/3637862/3643511/3637776/3637418/3635845/3646859/3647134/3640745/3643755/3641916/3641794/3641244/3637918/3639245/3638515/3639303	MED20/UGA32/ZCF25/CAALFM_CR03330WA/ZCF26/SFL1/ZCF27/LYS143/SRB8/HAP42/POL5/ZCF22/ARG81/LYS144/UGA33/ANB1/MED5/MED18/ARG83/AFT2/CTA7/MED1/SRB9/SOH1/CAALFM_C600640CA/CAT8/TAC1/SUC1/GAT1/GAL4/UME7/CAALFM_C602790CA/CAALFM_C307050WA/RCA1	34	20	30515250/3639333/3635694/3635666/3635631/3641128/3637727/3640512/3648211/3644103/3637862/3637418/3635845/3646859/3647134/3640745/3641794/3641244/3637918/3638515	14	3645095/3642498/3634894/3635729/3639254/3634775/3641886/3641648/3643511/3637776/3643755/3641916/3639245/3639303
BP	GO:0031326	regulation of cellular biosynthetic process	34/462	168/1862	0.939729	0.997286	30515250/3639333/3635694/3645095/3635666/3642498/3635631/3634894/3641128/3635729/3639254/3637727/3634775/3640512/3641886/3641648/3648211/3644103/3637862/3643511/3637776/3637418/3635845/3646859/3647134/3640745/3643755/3641916/3641794/3641244/3637918/3639245/3638515/3639303	MED20/UGA32/ZCF25/CAALFM_CR03330WA/ZCF26/SFL1/ZCF27/LYS143/SRB8/HAP42/POL5/ZCF22/ARG81/LYS144/UGA33/ANB1/MED5/MED18/ARG83/AFT2/CTA7/MED1/SRB9/SOH1/CAALFM_C600640CA/CAT8/TAC1/SUC1/GAT1/GAL4/UME7/CAALFM_C602790CA/CAALFM_C307050WA/RCA1	34	20	30515250/3639333/3635694/3635666/3635631/3641128/3637727/3640512/3648211/3644103/3637862/3637418/3635845/3646859/3647134/3640745/3641794/3641244/3637918/3638515	14	3645095/3642498/3634894/3635729/3639254/3634775/3641886/3641648/3643511/3637776/3643755/3641916/3639245/3639303
BP	GO:2000112	regulation of cellular macromolecule biosynthetic process	34/462	168/1862	0.939729	0.997286	30515250/3639333/3635694/3645095/3635666/3642498/3635631/3634894/3641128/3635729/3639254/3637727/3634775/3640512/3641886/3641648/3648211/3644103/3637862/3643511/3637776/3637418/3635845/3646859/3647134/3640745/3643755/3641916/3641794/3641244/3637918/3639245/3638515/3639303	MED20/UGA32/ZCF25/CAALFM_CR03330WA/ZCF26/SFL1/ZCF27/LYS143/SRB8/HAP42/POL5/ZCF22/ARG81/LYS144/UGA33/ANB1/MED5/MED18/ARG83/AFT2/CTA7/MED1/SRB9/SOH1/CAALFM_C600640CA/CAT8/TAC1/SUC1/GAT1/GAL4/UME7/CAALFM_C602790CA/CAALFM_C307050WA/RCA1	34	20	30515250/3639333/3635694/3635666/3635631/3641128/3637727/3640512/3648211/3644103/3637862/3637418/3635845/3646859/3647134/3640745/3641794/3641244/3637918/3638515	14	3645095/3642498/3634894/3635729/3639254/3634775/3641886/3641648/3643511/3637776/3643755/3641916/3639245/3639303
BP	GO:0006355	regulation of transcription, DNA-templated	33/462	164/1862	0.942012	0.997286	30515250/3639333/3635694/3645095/3635666/3642498/3635631/3634894/3641128/3635729/3639254/3637727/3634775/3640512/3641886/3648211/3644103/3637862/3643511/3637776/3637418/3635845/3646859/3647134/3640745/3643755/3641916/3641794/3641244/3637918/3639245/3638515/3639303	MED20/UGA32/ZCF25/CAALFM_CR03330WA/ZCF26/SFL1/ZCF27/LYS143/SRB8/HAP42/POL5/ZCF22/ARG81/LYS144/UGA33/MED5/MED18/ARG83/AFT2/CTA7/MED1/SRB9/SOH1/CAALFM_C600640CA/CAT8/TAC1/SUC1/GAT1/GAL4/UME7/CAALFM_C602790CA/CAALFM_C307050WA/RCA1	33	20	30515250/3639333/3635694/3635666/3635631/3641128/3637727/3640512/3648211/3644103/3637862/3637418/3635845/3646859/3647134/3640745/3641794/3641244/3637918/3638515	13	3645095/3642498/3634894/3635729/3639254/3634775/3641886/3643511/3637776/3643755/3641916/3639245/3639303
BP	GO:0051252	regulation of RNA metabolic process	33/462	164/1862	0.942012	0.997286	30515250/3639333/3635694/3645095/3635666/3642498/3635631/3634894/3641128/3635729/3639254/3637727/3634775/3640512/3641886/3648211/3644103/3637862/3643511/3637776/3637418/3635845/3646859/3647134/3640745/3643755/3641916/3641794/3641244/3637918/3639245/3638515/3639303	MED20/UGA32/ZCF25/CAALFM_CR03330WA/ZCF26/SFL1/ZCF27/LYS143/SRB8/HAP42/POL5/ZCF22/ARG81/LYS144/UGA33/MED5/MED18/ARG83/AFT2/CTA7/MED1/SRB9/SOH1/CAALFM_C600640CA/CAT8/TAC1/SUC1/GAT1/GAL4/UME7/CAALFM_C602790CA/CAALFM_C307050WA/RCA1	33	20	30515250/3639333/3635694/3635666/3635631/3641128/3637727/3640512/3648211/3644103/3637862/3637418/3635845/3646859/3647134/3640745/3641794/3641244/3637918/3638515	13	3645095/3642498/3634894/3635729/3639254/3634775/3641886/3643511/3637776/3643755/3641916/3639245/3639303
BP	GO:1903506	regulation of nucleic acid-templated transcription	33/462	164/1862	0.942012	0.997286	30515250/3639333/3635694/3645095/3635666/3642498/3635631/3634894/3641128/3635729/3639254/3637727/3634775/3640512/3641886/3648211/3644103/3637862/3643511/3637776/3637418/3635845/3646859/3647134/3640745/3643755/3641916/3641794/3641244/3637918/3639245/3638515/3639303	MED20/UGA32/ZCF25/CAALFM_CR03330WA/ZCF26/SFL1/ZCF27/LYS143/SRB8/HAP42/POL5/ZCF22/ARG81/LYS144/UGA33/MED5/MED18/ARG83/AFT2/CTA7/MED1/SRB9/SOH1/CAALFM_C600640CA/CAT8/TAC1/SUC1/GAT1/GAL4/UME7/CAALFM_C602790CA/CAALFM_C307050WA/RCA1	33	20	30515250/3639333/3635694/3635666/3635631/3641128/3637727/3640512/3648211/3644103/3637862/3637418/3635845/3646859/3647134/3640745/3641794/3641244/3637918/3638515	13	3645095/3642498/3634894/3635729/3639254/3634775/3641886/3643511/3637776/3643755/3641916/3639245/3639303
BP	GO:2001141	regulation of RNA biosynthetic process	33/462	164/1862	0.942012	0.997286	30515250/3639333/3635694/3645095/3635666/3642498/3635631/3634894/3641128/3635729/3639254/3637727/3634775/3640512/3641886/3648211/3644103/3637862/3643511/3637776/3637418/3635845/3646859/3647134/3640745/3643755/3641916/3641794/3641244/3637918/3639245/3638515/3639303	MED20/UGA32/ZCF25/CAALFM_CR03330WA/ZCF26/SFL1/ZCF27/LYS143/SRB8/HAP42/POL5/ZCF22/ARG81/LYS144/UGA33/MED5/MED18/ARG83/AFT2/CTA7/MED1/SRB9/SOH1/CAALFM_C600640CA/CAT8/TAC1/SUC1/GAT1/GAL4/UME7/CAALFM_C602790CA/CAALFM_C307050WA/RCA1	33	20	30515250/3639333/3635694/3635666/3635631/3641128/3637727/3640512/3648211/3644103/3637862/3637418/3635845/3646859/3647134/3640745/3641794/3641244/3637918/3638515	13	3645095/3642498/3634894/3635729/3639254/3634775/3641886/3643511/3637776/3643755/3641916/3639245/3639303
BP	GO:0006820	anion transport	1/462	10/1862	0.94272	0.997286	3642824	CAALFM_C406370CA	1	1	3642824	0
BP	GO:0072330	monocarboxylic acid biosynthetic process	1/462	10/1862	0.94272	0.997286	3643438	CDC19	1	0		1	3643438
BP	GO:0072525	pyridine-containing compound biosynthetic process	1/462	10/1862	0.94272	0.997286	3643438	CDC19	1	0		1	3643438
BP	GO:0010468	regulation of gene expression	34/462	169/1862	0.944826	0.997286	30515250/3639333/3635694/3645095/3635666/3642498/3635631/3634894/3641128/3635729/3639254/3637727/3634775/3640512/3641886/3641648/3648211/3644103/3637862/3643511/3637776/3637418/3635845/3646859/3647134/3640745/3643755/3641916/3641794/3641244/3637918/3639245/3638515/3639303	MED20/UGA32/ZCF25/CAALFM_CR03330WA/ZCF26/SFL1/ZCF27/LYS143/SRB8/HAP42/POL5/ZCF22/ARG81/LYS144/UGA33/ANB1/MED5/MED18/ARG83/AFT2/CTA7/MED1/SRB9/SOH1/CAALFM_C600640CA/CAT8/TAC1/SUC1/GAT1/GAL4/UME7/CAALFM_C602790CA/CAALFM_C307050WA/RCA1	34	20	30515250/3639333/3635694/3635666/3635631/3641128/3637727/3640512/3648211/3644103/3637862/3637418/3635845/3646859/3647134/3640745/3641794/3641244/3637918/3638515	14	3645095/3642498/3634894/3635729/3639254/3634775/3641886/3641648/3643511/3637776/3643755/3641916/3639245/3639303
BP	GO:0018130	heterocycle biosynthetic process	59/462	279/1862	0.94824	0.997286	3636649/30515250/3639333/3647071/3645198/3635694/3645095/3635666/3642498/3635631/3634894/3641128/3636401/3635729/3637926/3639254/3637727/3640719/3647593/3634775/3647677/3641407/3635594/3640512/3641886/3648211/3646827/3644103/3637862/3643438/3643511/3647390/3637776/3636459/3641233/3635259/3643481/3637418/3635845/3646859/3647134/3640745/3637996/3643427/3638333/3641813/3636501/3643755/3643176/363937…	URA3/MED20/UGA32/COX15/TAF4/ZCF25/CAALFM_CR03330WA/ZCF26/SFL1/ZCF27/LYS143/SRB8/CAALFM_C505350WA/HAP42/CAALFM_C403090WA/POL5/ZCF22/ADE5%2C7/CAALFM_CR05550CA/ARG81/RPA190/CYR1/CAALFM_C401820CA/LYS144/UGA33/MED5/CAALFM_C112810WA/MED18/ARG83/CDC19/AFT2/HEM13/CTA7/CAALFM_C505130CA/CAALFM_C210860CA/ADE2/CAALFM_C207200WA/MED1/SRB9/SOH1/CAALFM_C600640CA/CAT8/RPA135/RPC40/THI6/CAALFM_C405640CA/HIS1/TAC1/…	59	31	3636649/30515250/3639333/3645198/3635694/3635666/3635631/3641128/3636401/3637926/3637727/3641407/3635594/3640512/3648211/3644103/3637862/3636459/3637418/3635845/3646859/3647134/3640745/3638333/3641813/3636501/3641794/3642252/3641244/3637918/3638515	28	3647071/3645095/3642498/3634894/3635729/3639254/3640719/3647593/3634775/3647677/3641886/3646827/3643438/3643511/3647390/3637776/3641233/3635259/3643481/3637996/3643427/3643755/3643176/3639378/3641916/3639245/3639303/3634763
BP	GO:0044270	cellular nitrogen compound catabolic process	2/462	17/1862	0.9489	0.997286	3646847/3643438	CAALFM_C404270WA/CDC19	2	1	3646847	1	3643438
BP	GO:0046700	heterocycle catabolic process	2/462	17/1862	0.9489	0.997286	3646847/3643438	CAALFM_C404270WA/CDC19	2	1	3646847	1	3643438
BP	GO:1901361	organic cyclic compound catabolic process	2/462	17/1862	0.9489	0.997286	3646847/3643438	CAALFM_C404270WA/CDC19	2	1	3646847	1	3643438
BP	GO:0016043	cellular component organization	19/462	102/1862	0.94935	0.997286	3645874/3642502/3638037/3638917/3636834/30515038/3639714/3644034/3641648/3642929/30515358/3644120/3635665/3642959/3646043/3638433/3641896/3647897/3641815	CAALFM_C602300CA/CAALFM_CR05970CA/DCC1/CAALFM_CR10180WA/CAALFM_C102960CA/PET100/NAP1/TOP1/ANB1/EXM2/HHO1/CTF8/CAALFM_C401950WA/CAALFM_C407210WA/ARC15/ECM29/CAALFM_CR09490WA/HET1/BRN1	19	10	3638037/3638917/3636834/3642929/30515358/3635665/3642959/3646043/3641896/3641815	9	3645874/3642502/30515038/3639714/3644034/3641648/3644120/3638433/3647897
BP	GO:0016310	phosphorylation	20/462	107/1862	0.951401	0.997286	3641127/3637922/3637393/3640953/3643482/3641888/3641611/3642789/3643438/3641144/3645897/3643424/3642643/3644040/3639498/3641237/3645205/3642481/3646075/3641199	CAALFM_C404460CA/BUB1/HOG1/HST7/TPK2/MPS1/PTK2/CEK1/CDC19/SSK2/GCN2/CDC7/SNF1/VPS15/NPR1/AKL1/CAALFM_C207530CA/CAALFM_C105370CA/PKH3/KIN3	20	9	3641127/3637922/3643482/3642789/3641144/3645897/3644040/3645205/3642481	11	3637393/3640953/3641888/3641611/3643438/3643424/3642643/3639498/3641237/3646075/3641199
BP	GO:0019219	regulation of nucleobase-containing compound metabolic process	33/462	166/1862	0.951624	0.997286	30515250/3639333/3635694/3645095/3635666/3642498/3635631/3634894/3641128/3635729/3639254/3637727/3634775/3640512/3641886/3648211/3644103/3637862/3643511/3637776/3637418/3635845/3646859/3647134/3640745/3643755/3641916/3641794/3641244/3637918/3639245/3638515/3639303	MED20/UGA32/ZCF25/CAALFM_CR03330WA/ZCF26/SFL1/ZCF27/LYS143/SRB8/HAP42/POL5/ZCF22/ARG81/LYS144/UGA33/MED5/MED18/ARG83/AFT2/CTA7/MED1/SRB9/SOH1/CAALFM_C600640CA/CAT8/TAC1/SUC1/GAT1/GAL4/UME7/CAALFM_C602790CA/CAALFM_C307050WA/RCA1	33	20	30515250/3639333/3635694/3635666/3635631/3641128/3637727/3640512/3648211/3644103/3637862/3637418/3635845/3646859/3647134/3640745/3641794/3641244/3637918/3638515	13	3645095/3642498/3634894/3635729/3639254/3634775/3641886/3643511/3637776/3643755/3641916/3639245/3639303
BP	GO:0016053	organic acid biosynthetic process	4/462	29/1862	0.953584	0.997286	3640084/3643438/3641813/3636501	MET6/CDC19/CAALFM_C405640CA/HIS1	4	2	3641813/3636501	2	3640084/3643438
BP	GO:0046394	carboxylic acid biosynthetic process	4/462	29/1862	0.953584	0.997286	3640084/3643438/3641813/3636501	MET6/CDC19/CAALFM_C405640CA/HIS1	4	2	3641813/3636501	2	3640084/3643438
BP	GO:0007165	signal transduction	8/462	50/1862	0.954046	0.997286	3646953/3637434/3641407/3643737/3635220/3635661/3644788/3643298	TSC2/ROM2/CYR1/CDC24/SEC7/RGA2/TCO89/GDI1	8	4	3646953/3641407/3635220/3635661	4	3637434/3643737/3644788/3643298
BP	GO:0023052	signaling	8/462	50/1862	0.954046	0.997286	3646953/3637434/3641407/3643737/3635220/3635661/3644788/3643298	TSC2/ROM2/CYR1/CDC24/SEC7/RGA2/TCO89/GDI1	8	4	3646953/3641407/3635220/3635661	4	3637434/3643737/3644788/3643298
BP	GO:1901362	organic cyclic compound biosynthetic process	60/462	285/1862	0.954335	0.997286	3636649/30515250/3639333/3647071/3645198/3635694/3645095/3635666/3642498/3635631/3634894/3641128/3636401/3635729/3637926/3639254/3637727/3640719/3647593/3634775/3647677/3641407/3635594/3636655/3640512/3641886/3648211/3646827/3644103/3637862/3643438/3643511/3647390/3637776/3636459/3641233/3635259/3643481/3637418/3635845/3646859/3647134/3640745/3637996/3643427/3638333/3641813/3636501/3643755/364317…	URA3/MED20/UGA32/COX15/TAF4/ZCF25/CAALFM_CR03330WA/ZCF26/SFL1/ZCF27/LYS143/SRB8/CAALFM_C505350WA/HAP42/CAALFM_C403090WA/POL5/ZCF22/ADE5%2C7/CAALFM_CR05550CA/ARG81/RPA190/CYR1/CAALFM_C401820CA/ERG6/LYS144/UGA33/MED5/CAALFM_C112810WA/MED18/ARG83/CDC19/AFT2/HEM13/CTA7/CAALFM_C505130CA/CAALFM_C210860CA/ADE2/CAALFM_C207200WA/MED1/SRB9/SOH1/CAALFM_C600640CA/CAT8/RPA135/RPC40/THI6/CAALFM_C405640CA/HIS1/…	60	31	3636649/30515250/3639333/3645198/3635694/3635666/3635631/3641128/3636401/3637926/3637727/3641407/3635594/3640512/3648211/3644103/3637862/3636459/3637418/3635845/3646859/3647134/3640745/3638333/3641813/3636501/3641794/3642252/3641244/3637918/3638515	29	3647071/3645095/3642498/3634894/3635729/3639254/3640719/3647593/3634775/3647677/3636655/3641886/3646827/3643438/3643511/3647390/3637776/3641233/3635259/3643481/3637996/3643427/3643755/3643176/3639378/3641916/3639245/3639303/3634763
BP	GO:0051716	cellular response to stimulus	19/462	103/1862	0.954759	0.997286	3646953/3638917/3637434/3645324/3642939/3641407/3637887/3643737/3643511/3637913/3635220/3647757/3635834/3646519/3635661/3647134/3637896/3644788/3643298	TSC2/CAALFM_CR10180WA/ROM2/CAS1/MSH2/CYR1/CAALFM_C403290WA/CDC24/AFT2/CAALFM_C402590CA/SEC7/CAALFM_C300830CA/RAD23/CAALFM_C406020CA/RGA2/CAALFM_C600640CA/CAALFM_C402820WA/TCO89/GDI1	19	12	3646953/3638917/3645324/3642939/3641407/3637887/3637913/3635220/3646519/3635661/3647134/3637896	7	3637434/3643737/3643511/3647757/3635834/3644788/3643298
BP	GO:0009117	nucleotide metabolic process	6/462	40/1862	0.955952	0.997286	3641407/3635594/3643438/3636459/3635259/3634763	CYR1/CAALFM_C401820CA/CDC19/CAALFM_C505130CA/ADE2/GUA1	6	3	3641407/3635594/3636459	3	3643438/3635259/3634763
BP	GO:0051171	regulation of nitrogen compound metabolic process	35/462	176/1862	0.956161	0.997286	30515250/3639333/3635694/3645095/3635666/3642498/3635631/3634894/3641128/3635729/3639254/3637727/3634775/3640512/3641886/3641648/3648211/3644103/3637862/3643511/3637776/3637418/3635845/3646859/3647134/3640745/3643755/3641916/3641794/3636917/3641244/3637918/3639245/3638515/3639303	MED20/UGA32/ZCF25/CAALFM_CR03330WA/ZCF26/SFL1/ZCF27/LYS143/SRB8/HAP42/POL5/ZCF22/ARG81/LYS144/UGA33/ANB1/MED5/MED18/ARG83/AFT2/CTA7/MED1/SRB9/SOH1/CAALFM_C600640CA/CAT8/TAC1/SUC1/GAT1/RPN3/GAL4/UME7/CAALFM_C602790CA/CAALFM_C307050WA/RCA1	35	20	30515250/3639333/3635694/3635666/3635631/3641128/3637727/3640512/3648211/3644103/3637862/3637418/3635845/3646859/3647134/3640745/3641794/3641244/3637918/3638515	15	3645095/3642498/3634894/3635729/3639254/3634775/3641886/3641648/3643511/3637776/3643755/3641916/3636917/3639245/3639303
BP	GO:0080090	regulation of primary metabolic process	35/462	176/1862	0.956161	0.997286	30515250/3639333/3635694/3645095/3635666/3642498/3635631/3634894/3641128/3635729/3639254/3637727/3634775/3640512/3641886/3641648/3648211/3644103/3637862/3643511/3637776/3637418/3635845/3646859/3647134/3640745/3643755/3641916/3641794/3636917/3641244/3637918/3639245/3638515/3639303	MED20/UGA32/ZCF25/CAALFM_CR03330WA/ZCF26/SFL1/ZCF27/LYS143/SRB8/HAP42/POL5/ZCF22/ARG81/LYS144/UGA33/ANB1/MED5/MED18/ARG83/AFT2/CTA7/MED1/SRB9/SOH1/CAALFM_C600640CA/CAT8/TAC1/SUC1/GAT1/RPN3/GAL4/UME7/CAALFM_C602790CA/CAALFM_C307050WA/RCA1	35	20	30515250/3639333/3635694/3635666/3635631/3641128/3637727/3640512/3648211/3644103/3637862/3637418/3635845/3646859/3647134/3640745/3641794/3641244/3637918/3638515	15	3645095/3642498/3634894/3635729/3639254/3634775/3641886/3641648/3643511/3637776/3643755/3641916/3636917/3639245/3639303
BP	GO:0006261	DNA-dependent DNA replication	1/462	11/1862	0.957009	0.997286	3636401	CAALFM_C505350WA	1	1	3636401	0
BP	GO:0019362	pyridine nucleotide metabolic process	1/462	11/1862	0.957009	0.997286	3643438	CDC19	1	0		1	3643438
BP	GO:0046496	nicotinamide nucleotide metabolic process	1/462	11/1862	0.957009	0.997286	3643438	CDC19	1	0		1	3643438
BP	GO:0051726	regulation of cell cycle	1/462	11/1862	0.957009	0.997286	3645874	CAALFM_C602300CA	1	0		1	3645874
BP	GO:0006396	RNA processing	14/462	80/1862	0.957813	0.997286	3648179/3647851/3635700/3642929/3635677/3641808/3645129/3640722/3635757/3647682/3639690/3638502/3638903/3644399	SPB1/CAALFM_C403830WA/CAALFM_C401280CA/EXM2/CAALFM_C400940WA/CGT1/SSU72/MRPL3/UTP21/CAALFM_C110620WA/CAALFM_CR00630WA/CAALFM_C306760WA/CAALFM_C200200WA/CAALFM_C111160CA	14	7	3647851/3635700/3642929/3635677/3641808/3639690/3638903	7	3648179/3645129/3640722/3635757/3647682/3638502/3644399
BP	GO:0006259	DNA metabolic process	15/462	85/1862	0.958996	0.997286	3636401/3638917/3642989/3645737/3645324/3642939/3637887/3644034/3637913/3644456/3647757/3635834/3646519/3647134/3637896	CAALFM_C505350WA/CAALFM_CR10180WA/RNR1/CAALFM_CR06960WA/CAS1/MSH2/CAALFM_C403290WA/TOP1/CAALFM_C402590CA/CAALFM_C107260CA/CAALFM_C300830CA/RAD23/CAALFM_C406020CA/CAALFM_C600640CA/CAALFM_C402820WA	15	11	3636401/3638917/3645737/3645324/3642939/3637887/3637913/3644456/3646519/3647134/3637896	4	3642989/3644034/3647757/3635834
BP	GO:0016070	RNA metabolic process	74/462	347/1862	0.960106	0.997286	30515250/3639333/3636831/3645124/3645198/3635694/3645095/3635666/3645956/3642498/3640285/3635631/3634894/3641128/3636401/3635729/3637926/3648179/3639254/3637727/3640121/3647593/3634775/3647851/3647677/3635700/3640275/3647882/3640512/3645332/3641886/3645137/3648211/3642929/3635677/3644103/3637862/3643511/3638029/3636516/3637776/3641808/3636398/3645881/3645129/3643481/3637418/3635845/3646859/364292…	MED20/UGA32/MST1/CAALFM_CR03110WA/TAF4/ZCF25/CAALFM_CR03330WA/ZCF26/ILS1/SFL1/ALA1/ZCF27/LYS143/SRB8/CAALFM_C505350WA/HAP42/CAALFM_C403090WA/SPB1/POL5/ZCF22/FRS1/CAALFM_CR05550CA/ARG81/CAALFM_C403830WA/RPA190/CAALFM_C401280CA/NAM2/THS1/LYS144/GAR1/UGA33/CAALFM_CR03400WA/MED5/EXM2/CAALFM_C400940WA/MED18/ARG83/AFT2/GUS1/MES1/CTA7/CGT1/MSM1/CAALFM_C602350CA/SSU72/CAALFM_C207200WA/MED1/SRB9/SOH1/CAAL…	74	32	30515250/3639333/3645198/3635694/3635666/3635631/3641128/3636401/3637926/3637727/3647851/3635700/3640512/3648211/3642929/3635677/3644103/3637862/3641808/3637418/3635845/3646859/3642927/3647134/3640745/3641794/3642252/3641244/3637918/3639690/3638515/3638903	42	3636831/3645124/3645095/3645956/3642498/3640285/3634894/3635729/3648179/3639254/3640121/3647593/3634775/3647677/3640275/3647882/3645332/3641886/3645137/3643511/3638029/3636516/3637776/3636398/3645881/3645129/3643481/3640128/3640722/3637996/3635757/3643427/3643755/3639378/3641916/3638486/3647682/3639245/3638502/3640232/3639303/3644399
BP	GO:0006753	nucleoside phosphate metabolic process	6/462	41/1862	0.962931	0.997286	3641407/3635594/3643438/3636459/3635259/3634763	CYR1/CAALFM_C401820CA/CDC19/CAALFM_C505130CA/ADE2/GUA1	6	3	3641407/3635594/3636459	3	3643438/3635259/3634763
BP	GO:0006260	DNA replication	5/462	36/1862	0.965242	0.997286	3636401/3642989/3645737/3637913/3644456	CAALFM_C505350WA/RNR1/CAALFM_CR06960WA/CAALFM_C402590CA/CAALFM_C107260CA	5	4	3636401/3645737/3637913/3644456	1	3642989
BP	GO:0044271	cellular nitrogen compound biosynthetic process	88/462	409/1862	0.966164	0.997286	3636649/30515250/3639333/3647071/3636831/3645198/3635694/3645095/3635666/3645956/3642498/3640285/3641734/3635631/3639724/3634894/3639723/3641128/3636401/3635729/3637926/3639254/3646358/3637727/3640121/3643513/3640719/3647593/3634775/3647677/3641407/3635594/3639497/3640275/3647882/3640512/3641886/3640548/3641648/3645137/3648211/30515335/3642506/3646827/3644103/3646039/3637862/3643438/3643511/36473…	URA3/MED20/UGA32/COX15/MST1/TAF4/ZCF25/CAALFM_CR03330WA/ZCF26/ILS1/SFL1/ALA1/CAM1/ZCF27/MRPL6/LYS143/CAALFM_CR00490WA/SRB8/CAALFM_C505350WA/HAP42/CAALFM_C403090WA/POL5/CAM1-1/ZCF22/FRS1/CAALFM_C207190CA/ADE5%2C7/CAALFM_CR05550CA/ARG81/RPA190/CYR1/CAALFM_C401820CA/MRPL19/NAM2/THS1/LYS144/UGA33/CAALFM_C300450CA/ANB1/CAALFM_CR03400WA/MED5/RPL32/RSM22/CAALFM_C112810WA/MED18/MRPL8/ARG83/CDC19/AFT2/HEM…	88	30	3636649/30515250/3639333/3645198/3635694/3635666/3635631/3641128/3636401/3637926/3637727/3641407/3635594/3640512/3648211/3644103/3637862/3636459/3637418/3635845/3646859/3647134/3640745/3638333/3644116/3641794/3642252/3641244/3637918/3638515	58	3647071/3636831/3645095/3645956/3642498/3640285/3641734/3639724/3634894/3639723/3635729/3639254/3646358/3640121/3643513/3640719/3647593/3634775/3647677/3639497/3640275/3647882/3641886/3640548/3641648/3645137/30515335/3642506/3646827/3646039/3643438/3643511/3647390/3638029/3636516/3637776/3641233/3635259/3636398/3643481/3640128/3637996/3643427/3643755/30515301/3643176/3639378/3641916/3637954/36384…
BP	GO:0019222	regulation of metabolic process	35/462	179/1862	0.966862	0.997286	30515250/3639333/3635694/3645095/3635666/3642498/3635631/3634894/3641128/3635729/3639254/3637727/3634775/3640512/3641886/3641648/3648211/3644103/3637862/3643511/3637776/3637418/3635845/3646859/3647134/3640745/3643755/3641916/3641794/3636917/3641244/3637918/3639245/3638515/3639303	MED20/UGA32/ZCF25/CAALFM_CR03330WA/ZCF26/SFL1/ZCF27/LYS143/SRB8/HAP42/POL5/ZCF22/ARG81/LYS144/UGA33/ANB1/MED5/MED18/ARG83/AFT2/CTA7/MED1/SRB9/SOH1/CAALFM_C600640CA/CAT8/TAC1/SUC1/GAT1/RPN3/GAL4/UME7/CAALFM_C602790CA/CAALFM_C307050WA/RCA1	35	20	30515250/3639333/3635694/3635666/3635631/3641128/3637727/3640512/3648211/3644103/3637862/3637418/3635845/3646859/3647134/3640745/3641794/3641244/3637918/3638515	15	3645095/3642498/3634894/3635729/3639254/3634775/3641886/3641648/3643511/3637776/3643755/3641916/3636917/3639245/3639303
BP	GO:0060255	regulation of macromolecule metabolic process	35/462	179/1862	0.966862	0.997286	30515250/3639333/3635694/3645095/3635666/3642498/3635631/3634894/3641128/3635729/3639254/3637727/3634775/3640512/3641886/3641648/3648211/3644103/3637862/3643511/3637776/3637418/3635845/3646859/3647134/3640745/3643755/3641916/3641794/3636917/3641244/3637918/3639245/3638515/3639303	MED20/UGA32/ZCF25/CAALFM_CR03330WA/ZCF26/SFL1/ZCF27/LYS143/SRB8/HAP42/POL5/ZCF22/ARG81/LYS144/UGA33/ANB1/MED5/MED18/ARG83/AFT2/CTA7/MED1/SRB9/SOH1/CAALFM_C600640CA/CAT8/TAC1/SUC1/GAT1/RPN3/GAL4/UME7/CAALFM_C602790CA/CAALFM_C307050WA/RCA1	35	20	30515250/3639333/3635694/3635666/3635631/3641128/3637727/3640512/3648211/3644103/3637862/3637418/3635845/3646859/3647134/3640745/3641794/3641244/3637918/3638515	15	3645095/3642498/3634894/3635729/3639254/3634775/3641886/3641648/3643511/3637776/3643755/3641916/3636917/3639245/3639303
BP	GO:0006732	coenzyme metabolic process	3/462	25/1862	0.967265	0.997286	3644538/3643438/3636459	SAM2/CDC19/CAALFM_C505130CA	3	1	3636459	2	3644538/3643438
BP	GO:0050790	regulation of catalytic activity	1/462	12/1862	0.967739	0.997286	3646953	TSC2	1	1	3646953	0
BP	GO:0065009	regulation of molecular function	1/462	12/1862	0.967739	0.997286	3646953	TSC2	1	1	3646953	0
BP	GO:0072524	pyridine-containing compound metabolic process	1/462	12/1862	0.967739	0.997286	3643438	CDC19	1	0		1	3643438
BP	GO:0065007	biological regulation	55/462	268/1862	0.968407	0.997286	3642631/3646953/30515250/3639333/3648085/3645874/3635694/3645095/3635666/3642498/3635631/3646660/3634894/3641367/3641128/3635729/3639254/3637434/3637844/3637727/3634775/3641407/3640512/3641886/3640185/3641648/3646505/3648211/3644103/3637862/3635665/3643737/3643511/3646043/3635220/3637776/3637418/3635845/3646859/3635661/3647134/3640745/3643755/3646037/3641916/3641794/3644788/3636917/3640957/364124…	TRX2/TSC2/MED20/UGA32/CAALFM_C406130WA/CAALFM_C602300CA/ZCF25/CAALFM_CR03330WA/ZCF26/SFL1/ZCF27/CAALFM_C107630WA/LYS143/PDI1/SRB8/HAP42/POL5/ROM2/CAALFM_C402460WA/ZCF22/ARG81/CYR1/LYS144/UGA33/CAALFM_C101300WA/ANB1/GCV2/MED5/MED18/ARG83/CAALFM_C401950WA/CDC24/AFT2/ARC15/SEC7/CTA7/MED1/SRB9/SOH1/RGA2/CAALFM_C600640CA/CAT8/TAC1/LPD1/SUC1/GAT1/TCO89/RPN3/CAALFM_CR03930CA/GAL4/UME7/CAALFM_C602790CA/C…	55	29	3642631/3646953/30515250/3639333/3648085/3635694/3635666/3635631/3641128/3637844/3637727/3641407/3640512/3648211/3644103/3637862/3635665/3646043/3635220/3637418/3635845/3646859/3635661/3647134/3640745/3641794/3641244/3637918/3638515	26	3645874/3645095/3642498/3646660/3634894/3641367/3635729/3639254/3637434/3634775/3641886/3640185/3641648/3646505/3643737/3643511/3637776/3643755/3646037/3641916/3644788/3636917/3640957/3639245/3643298/3639303
BP	GO:0031323	regulation of cellular metabolic process	34/462	175/1862	0.968409	0.997286	30515250/3639333/3635694/3645095/3635666/3642498/3635631/3634894/3641128/3635729/3639254/3637727/3634775/3640512/3641886/3641648/3648211/3644103/3637862/3643511/3637776/3637418/3635845/3646859/3647134/3640745/3643755/3641916/3641794/3641244/3637918/3639245/3638515/3639303	MED20/UGA32/ZCF25/CAALFM_CR03330WA/ZCF26/SFL1/ZCF27/LYS143/SRB8/HAP42/POL5/ZCF22/ARG81/LYS144/UGA33/ANB1/MED5/MED18/ARG83/AFT2/CTA7/MED1/SRB9/SOH1/CAALFM_C600640CA/CAT8/TAC1/SUC1/GAT1/GAL4/UME7/CAALFM_C602790CA/CAALFM_C307050WA/RCA1	34	20	30515250/3639333/3635694/3635666/3635631/3641128/3637727/3640512/3648211/3644103/3637862/3637418/3635845/3646859/3647134/3640745/3641794/3641244/3637918/3638515	14	3645095/3642498/3634894/3635729/3639254/3634775/3641886/3641648/3643511/3637776/3643755/3641916/3639245/3639303
BP	GO:0098655	cation transmembrane transport	4/462	31/1862	0.9687	0.997286	3639546/3647077/3640111/30515402	HAK1/CTR1/VMA4/VMA13	4	3	3639546/3640111/30515402	1	3647077
BP	GO:0098660	inorganic ion transmembrane transport	4/462	31/1862	0.9687	0.997286	3639546/3647077/3640111/30515402	HAK1/CTR1/VMA4/VMA13	4	3	3639546/3640111/30515402	1	3647077
BP	GO:0098662	inorganic cation transmembrane transport	4/462	31/1862	0.9687	0.997286	3639546/3647077/3640111/30515402	HAK1/CTR1/VMA4/VMA13	4	3	3639546/3640111/30515402	1	3647077
BP	GO:0006733	oxidoreduction coenzyme metabolic process	1/462	13/1862	0.975796	0.997286	3643438	CDC19	1	0		1	3643438
BP	GO:0016311	dephosphorylation	1/462	13/1862	0.975796	0.997286	3646526	PPS1	1	1	3646526	0
BP	GO:0034655	nucleobase-containing compound catabolic process	1/462	13/1862	0.975796	0.997286	3643438	CDC19	1	0		1	3643438
BP	GO:0034645	cellular macromolecule biosynthetic process	91/462	427/1862	0.976704	0.997286	3638384/30515250/3639333/3636831/3645198/3641116/3635694/3645095/3635666/3645956/3642498/3640285/3641734/3635631/3639724/3634894/3639723/3644405/3641128/3636401/3635729/3637926/3639254/3642989/3645737/3646358/3637727/3640121/3643513/3647593/3645575/3634775/3647677/3634904/3635641/3639497/3640275/3647882/3640512/3641886/3640548/3641648/3645137/3648211/30515335/3642506/3640410/3644103/3641019/36416…	KRE5/MED20/UGA32/MST1/TAF4/PMT6/ZCF25/CAALFM_CR03330WA/ZCF26/ILS1/SFL1/ALA1/CAM1/ZCF27/MRPL6/LYS143/CAALFM_CR00490WA/MNN2/SRB8/CAALFM_C505350WA/HAP42/CAALFM_C403090WA/POL5/RNR1/CAALFM_CR06960WA/CAM1-1/ZCF22/FRS1/CAALFM_C207190CA/CAALFM_CR05550CA/GWT1/ARG81/RPA190/MNN12/CAALFM_C402100CA/MRPL19/NAM2/THS1/LYS144/UGA33/CAALFM_C300450CA/ANB1/CAALFM_CR03400WA/MED5/RPL32/RSM22/GSL2/MED18/SPT14/CAALFM_C6…	91	36	30515250/3639333/3645198/3641116/3635694/3635666/3635631/3641128/3636401/3637926/3645737/3637727/3645575/3634904/3635641/3640512/3648211/3640410/3644103/3641019/3637862/3637913/3638789/3644456/3637418/3635845/3646859/3647134/3640745/3641794/3639844/3637921/3642252/3641244/3637918/3638515	55	3638384/3636831/3645095/3645956/3642498/3640285/3641734/3639724/3634894/3639723/3644405/3635729/3639254/3642989/3646358/3640121/3643513/3647593/3634775/3647677/3639497/3640275/3647882/3641886/3640548/3641648/3645137/30515335/3642506/3641607/3646039/3645443/3643511/3638029/3636516/3637776/3636398/3643481/3640435/3640128/3637996/3643427/3643755/30515301/3639378/3641916/3637954/3638486/3643347/30515…
BP	GO:0019438	aromatic compound biosynthetic process	56/462	277/1862	0.978544	0.997286	30515250/3639333/3647071/3645198/3635694/3645095/3635666/3642498/3635631/3634894/3641128/3636401/3635729/3637926/3639254/3637727/3640719/3647593/3634775/3647677/3641407/3635594/3640512/3641886/3648211/3644103/3637862/3643438/3643511/3647390/3637776/3636459/3641233/3635259/3643481/3637418/3635845/3646859/3647134/3640745/3637996/3643427/3638333/3641813/3636501/3643755/3639378/3641916/3641794/364225…	MED20/UGA32/COX15/TAF4/ZCF25/CAALFM_CR03330WA/ZCF26/SFL1/ZCF27/LYS143/SRB8/CAALFM_C505350WA/HAP42/CAALFM_C403090WA/POL5/ZCF22/ADE5%2C7/CAALFM_CR05550CA/ARG81/RPA190/CYR1/CAALFM_C401820CA/LYS144/UGA33/MED5/MED18/ARG83/CDC19/AFT2/HEM13/CTA7/CAALFM_C505130CA/CAALFM_C210860CA/ADE2/CAALFM_C207200WA/MED1/SRB9/SOH1/CAALFM_C600640CA/CAT8/RPA135/RPC40/THI6/CAALFM_C405640CA/HIS1/TAC1/RPO41/SUC1/GAT1/TAF60/…	56	30	30515250/3639333/3645198/3635694/3635666/3635631/3641128/3636401/3637926/3637727/3641407/3635594/3640512/3648211/3644103/3637862/3636459/3637418/3635845/3646859/3647134/3640745/3638333/3641813/3636501/3641794/3642252/3641244/3637918/3638515	26	3647071/3645095/3642498/3634894/3635729/3639254/3640719/3647593/3634775/3647677/3641886/3643438/3643511/3647390/3637776/3641233/3635259/3643481/3637996/3643427/3643755/3639378/3641916/3639245/3639303/3634763
BP	GO:0032774	RNA biosynthetic process	43/462	220/1862	0.979632	0.997286	30515250/3639333/3645198/3635694/3645095/3635666/3642498/3635631/3634894/3641128/3636401/3635729/3637926/3639254/3637727/3647593/3634775/3647677/3640512/3641886/3648211/3644103/3637862/3643511/3637776/3643481/3637418/3635845/3646859/3647134/3640745/3637996/3643427/3643755/3639378/3641916/3641794/3642252/3641244/3637918/3639245/3638515/3639303	MED20/UGA32/TAF4/ZCF25/CAALFM_CR03330WA/ZCF26/SFL1/ZCF27/LYS143/SRB8/CAALFM_C505350WA/HAP42/CAALFM_C403090WA/POL5/ZCF22/CAALFM_CR05550CA/ARG81/RPA190/LYS144/UGA33/MED5/MED18/ARG83/AFT2/CTA7/CAALFM_C207200WA/MED1/SRB9/SOH1/CAALFM_C600640CA/CAT8/RPA135/RPC40/TAC1/RPO41/SUC1/GAT1/TAF60/GAL4/UME7/CAALFM_C602790CA/CAALFM_C307050WA/RCA1	43	24	30515250/3639333/3645198/3635694/3635666/3635631/3641128/3636401/3637926/3637727/3640512/3648211/3644103/3637862/3637418/3635845/3646859/3647134/3640745/3641794/3642252/3641244/3637918/3638515	19	3645095/3642498/3634894/3635729/3639254/3647593/3634775/3647677/3641886/3643511/3637776/3643481/3637996/3643427/3643755/3639378/3641916/3639245/3639303
BP	GO:0009059	macromolecule biosynthetic process	91/462	430/1862	0.981336	0.997286	3638384/30515250/3639333/3636831/3645198/3641116/3635694/3645095/3635666/3645956/3642498/3640285/3641734/3635631/3639724/3634894/3639723/3644405/3641128/3636401/3635729/3637926/3639254/3642989/3645737/3646358/3637727/3640121/3643513/3647593/3645575/3634775/3647677/3634904/3635641/3639497/3640275/3647882/3640512/3641886/3640548/3641648/3645137/3648211/30515335/3642506/3640410/3644103/3641019/36416…	KRE5/MED20/UGA32/MST1/TAF4/PMT6/ZCF25/CAALFM_CR03330WA/ZCF26/ILS1/SFL1/ALA1/CAM1/ZCF27/MRPL6/LYS143/CAALFM_CR00490WA/MNN2/SRB8/CAALFM_C505350WA/HAP42/CAALFM_C403090WA/POL5/RNR1/CAALFM_CR06960WA/CAM1-1/ZCF22/FRS1/CAALFM_C207190CA/CAALFM_CR05550CA/GWT1/ARG81/RPA190/MNN12/CAALFM_C402100CA/MRPL19/NAM2/THS1/LYS144/UGA33/CAALFM_C300450CA/ANB1/CAALFM_CR03400WA/MED5/RPL32/RSM22/GSL2/MED18/SPT14/CAALFM_C6…	91	36	30515250/3639333/3645198/3641116/3635694/3635666/3635631/3641128/3636401/3637926/3645737/3637727/3645575/3634904/3635641/3640512/3648211/3640410/3644103/3641019/3637862/3637913/3638789/3644456/3637418/3635845/3646859/3647134/3640745/3641794/3639844/3637921/3642252/3641244/3637918/3638515	55	3638384/3636831/3645095/3645956/3642498/3640285/3641734/3639724/3634894/3639723/3644405/3635729/3639254/3642989/3646358/3640121/3643513/3647593/3634775/3647677/3639497/3640275/3647882/3641886/3640548/3641648/3645137/30515335/3642506/3641607/3646039/3645443/3643511/3638029/3636516/3637776/3636398/3643481/3640435/3640128/3637996/3643427/3643755/30515301/3639378/3641916/3637954/3638486/3643347/30515…
BP	GO:0006754	ATP biosynthetic process	1/462	14/1862	0.981843	0.997286	3643438	CDC19	1	0		1	3643438
BP	GO:0009142	nucleoside triphosphate biosynthetic process	1/462	14/1862	0.981843	0.997286	3643438	CDC19	1	0		1	3643438
BP	GO:0009145	purine nucleoside triphosphate biosynthetic process	1/462	14/1862	0.981843	0.997286	3643438	CDC19	1	0		1	3643438
BP	GO:0009201	ribonucleoside triphosphate biosynthetic process	1/462	14/1862	0.981843	0.997286	3643438	CDC19	1	0		1	3643438
BP	GO:0009206	purine ribonucleoside triphosphate biosynthetic process	1/462	14/1862	0.981843	0.997286	3643438	CDC19	1	0		1	3643438
BP	GO:0048523	negative regulation of cellular process	1/462	14/1862	0.981843	0.997286	3635665	CAALFM_C401950WA	1	1	3635665	0
BP	GO:0006812	cation transport	9/462	61/1862	0.981905	0.997286	3639546/3644867/3647141/3635861/3635609/3647077/3640111/3639861/30515402	HAK1/CAALFM_CR06230WA/NHX1/ZRT2/CAALFM_C400990WA/CTR1/VMA4/PHO87/VMA13	9	6	3639546/3635861/3635609/3640111/3639861/30515402	3	3644867/3647141/3647077
BP	GO:0050789	regulation of biological process	51/462	257/1862	0.982084	0.997286	3642631/3646953/30515250/3639333/3645874/3635694/3645095/3635666/3642498/3635631/3646660/3634894/3641367/3641128/3635729/3639254/3637434/3637727/3634775/3641407/3640512/3641886/3640185/3641648/3648211/3644103/3637862/3635665/3643737/3643511/3646043/3635220/3637776/3637418/3635845/3646859/3635661/3647134/3640745/3643755/3646037/3641916/3641794/3644788/3636917/3641244/3637918/3639245/3638515/364329…	TRX2/TSC2/MED20/UGA32/CAALFM_C602300CA/ZCF25/CAALFM_CR03330WA/ZCF26/SFL1/ZCF27/CAALFM_C107630WA/LYS143/PDI1/SRB8/HAP42/POL5/ROM2/ZCF22/ARG81/CYR1/LYS144/UGA33/CAALFM_C101300WA/ANB1/MED5/MED18/ARG83/CAALFM_C401950WA/CDC24/AFT2/ARC15/SEC7/CTA7/MED1/SRB9/SOH1/RGA2/CAALFM_C600640CA/CAT8/TAC1/LPD1/SUC1/GAT1/TCO89/RPN3/GAL4/UME7/CAALFM_C602790CA/CAALFM_C307050WA/GDI1/RCA1	51	27	3642631/3646953/30515250/3639333/3635694/3635666/3635631/3641128/3637727/3641407/3640512/3648211/3644103/3637862/3635665/3646043/3635220/3637418/3635845/3646859/3635661/3647134/3640745/3641794/3641244/3637918/3638515	24	3645874/3645095/3642498/3646660/3634894/3641367/3635729/3639254/3637434/3634775/3641886/3640185/3641648/3643737/3643511/3637776/3643755/3646037/3641916/3644788/3636917/3639245/3643298/3639303
BP	GO:0050794	regulation of cellular process	50/462	253/1862	0.982779	0.997286	3642631/3646953/30515250/3639333/3645874/3635694/3645095/3635666/3642498/3635631/3646660/3634894/3641367/3641128/3635729/3639254/3637434/3637727/3634775/3641407/3640512/3641886/3640185/3641648/3648211/3644103/3637862/3635665/3643737/3643511/3646043/3635220/3637776/3637418/3635845/3646859/3635661/3647134/3640745/3643755/3646037/3641916/3641794/3644788/3641244/3637918/3639245/3638515/3643298/3639303	TRX2/TSC2/MED20/UGA32/CAALFM_C602300CA/ZCF25/CAALFM_CR03330WA/ZCF26/SFL1/ZCF27/CAALFM_C107630WA/LYS143/PDI1/SRB8/HAP42/POL5/ROM2/ZCF22/ARG81/CYR1/LYS144/UGA33/CAALFM_C101300WA/ANB1/MED5/MED18/ARG83/CAALFM_C401950WA/CDC24/AFT2/ARC15/SEC7/CTA7/MED1/SRB9/SOH1/RGA2/CAALFM_C600640CA/CAT8/TAC1/LPD1/SUC1/GAT1/TCO89/GAL4/UME7/CAALFM_C602790CA/CAALFM_C307050WA/GDI1/RCA1	50	27	3642631/3646953/30515250/3639333/3635694/3635666/3635631/3641128/3637727/3641407/3640512/3648211/3644103/3637862/3635665/3646043/3635220/3637418/3635845/3646859/3635661/3647134/3640745/3641794/3641244/3637918/3638515	23	3645874/3645095/3642498/3646660/3634894/3641367/3635729/3639254/3637434/3634775/3641886/3640185/3641648/3643737/3643511/3637776/3643755/3646037/3641916/3644788/3639245/3643298/3639303
BP	GO:0034220	ion transmembrane transport	4/462	34/1862	0.983014	0.997286	3639546/3647077/3640111/30515402	HAK1/CTR1/VMA4/VMA13	4	3	3639546/3640111/30515402	1	3647077
BP	GO:0006811	ion transport	12/462	77/1862	0.983638	0.997286	3642824/3639546/3642303/3644867/3647141/3635861/3635609/3647077/3640111/3639861/3645419/30515402	CAALFM_C406370CA/HAK1/YVC1/CAALFM_CR06230WA/NHX1/ZRT2/CAALFM_C400990WA/CTR1/VMA4/PHO87/HSP30/VMA13	12	9	3642824/3639546/3642303/3635861/3635609/3640111/3639861/3645419/30515402	3	3644867/3647141/3647077
BP	GO:0006351	transcription, DNA-templated	42/462	218/1862	0.983961	0.997286	30515250/3639333/3645198/3635694/3645095/3635666/3642498/3635631/3634894/3641128/3635729/3637926/3639254/3637727/3647593/3634775/3647677/3640512/3641886/3648211/3644103/3637862/3643511/3637776/3643481/3637418/3635845/3646859/3647134/3640745/3637996/3643427/3643755/3639378/3641916/3641794/3642252/3641244/3637918/3639245/3638515/3639303	MED20/UGA32/TAF4/ZCF25/CAALFM_CR03330WA/ZCF26/SFL1/ZCF27/LYS143/SRB8/HAP42/CAALFM_C403090WA/POL5/ZCF22/CAALFM_CR05550CA/ARG81/RPA190/LYS144/UGA33/MED5/MED18/ARG83/AFT2/CTA7/CAALFM_C207200WA/MED1/SRB9/SOH1/CAALFM_C600640CA/CAT8/RPA135/RPC40/TAC1/RPO41/SUC1/GAT1/TAF60/GAL4/UME7/CAALFM_C602790CA/CAALFM_C307050WA/RCA1	42	23	30515250/3639333/3645198/3635694/3635666/3635631/3641128/3637926/3637727/3640512/3648211/3644103/3637862/3637418/3635845/3646859/3647134/3640745/3641794/3642252/3641244/3637918/3638515	19	3645095/3642498/3634894/3635729/3639254/3647593/3634775/3647677/3641886/3643511/3637776/3643481/3637996/3643427/3643755/3639378/3641916/3639245/3639303
BP	GO:0097659	nucleic acid-templated transcription	42/462	218/1862	0.983961	0.997286	30515250/3639333/3645198/3635694/3645095/3635666/3642498/3635631/3634894/3641128/3635729/3637926/3639254/3637727/3647593/3634775/3647677/3640512/3641886/3648211/3644103/3637862/3643511/3637776/3643481/3637418/3635845/3646859/3647134/3640745/3637996/3643427/3643755/3639378/3641916/3641794/3642252/3641244/3637918/3639245/3638515/3639303	MED20/UGA32/TAF4/ZCF25/CAALFM_CR03330WA/ZCF26/SFL1/ZCF27/LYS143/SRB8/HAP42/CAALFM_C403090WA/POL5/ZCF22/CAALFM_CR05550CA/ARG81/RPA190/LYS144/UGA33/MED5/MED18/ARG83/AFT2/CTA7/CAALFM_C207200WA/MED1/SRB9/SOH1/CAALFM_C600640CA/CAT8/RPA135/RPC40/TAC1/RPO41/SUC1/GAT1/TAF60/GAL4/UME7/CAALFM_C602790CA/CAALFM_C307050WA/RCA1	42	23	30515250/3639333/3645198/3635694/3635666/3635631/3641128/3637926/3637727/3640512/3648211/3644103/3637862/3637418/3635845/3646859/3647134/3640745/3641794/3642252/3641244/3637918/3638515	19	3645095/3642498/3634894/3635729/3639254/3647593/3634775/3647677/3641886/3643511/3637776/3643481/3637996/3643427/3643755/3639378/3641916/3639245/3639303
BP	GO:1902600	proton transmembrane transport	2/462	22/1862	0.984862	0.997286	3640111/30515402	VMA4/VMA13	2	2	3640111/30515402	0
BP	GO:0019439	aromatic compound catabolic process	1/462	15/1862	0.986383	0.997286	3643438	CDC19	1	0		1	3643438
BP	GO:0034470	ncRNA processing	5/462	42/1862	0.989074	0.997286	3648179/3635677/3635757/3638502/3644399	SPB1/CAALFM_C400940WA/UTP21/CAALFM_C306760WA/CAALFM_C111160CA	5	1	3635677	4	3648179/3635757/3638502/3644399
BP	GO:0034654	nucleobase-containing compound biosynthetic process	49/462	255/1862	0.99068	0.997286	30515250/3639333/3645198/3635694/3645095/3635666/3642498/3635631/3634894/3641128/3636401/3635729/3637926/3639254/3637727/3647593/3634775/3647677/3641407/3635594/3640512/3641886/3648211/3644103/3637862/3643438/3643511/3637776/3636459/3635259/3643481/3637418/3635845/3646859/3647134/3640745/3637996/3643427/3643755/3639378/3641916/3641794/3642252/3641244/3637918/3639245/3638515/3639303/3634763	MED20/UGA32/TAF4/ZCF25/CAALFM_CR03330WA/ZCF26/SFL1/ZCF27/LYS143/SRB8/CAALFM_C505350WA/HAP42/CAALFM_C403090WA/POL5/ZCF22/CAALFM_CR05550CA/ARG81/RPA190/CYR1/CAALFM_C401820CA/LYS144/UGA33/MED5/MED18/ARG83/CDC19/AFT2/CTA7/CAALFM_C505130CA/ADE2/CAALFM_C207200WA/MED1/SRB9/SOH1/CAALFM_C600640CA/CAT8/RPA135/RPC40/TAC1/RPO41/SUC1/GAT1/TAF60/GAL4/UME7/CAALFM_C602790CA/CAALFM_C307050WA/RCA1/GUA1	49	27	30515250/3639333/3645198/3635694/3635666/3635631/3641128/3636401/3637926/3637727/3641407/3635594/3640512/3648211/3644103/3637862/3636459/3637418/3635845/3646859/3647134/3640745/3641794/3642252/3641244/3637918/3638515	22	3645095/3642498/3634894/3635729/3639254/3647593/3634775/3647677/3641886/3643438/3643511/3637776/3635259/3643481/3637996/3643427/3643755/3639378/3641916/3639245/3639303/3634763
BP	GO:0048519	negative regulation of biological process	1/462	17/1862	0.992344	0.997286	3635665	CAALFM_C401950WA	1	1	3635665	0
BP	GO:0006796	phosphate-containing compound metabolic process	34/462	189/1862	0.992777	0.997286	3638966/3641127/3637922/3637393/3646526/3645575/3641407/3635594/3644563/3640953/3643482/3635641/3641888/3641611/3641019/3642789/3641607/3643438/3641144/3636459/3635259/3645897/3643424/3642643/3644040/3635766/3639498/3637921/3641237/3645205/3642481/3646075/3634763/3641199	INO1/CAALFM_C404460CA/BUB1/HOG1/PPS1/GWT1/CYR1/CAALFM_C401820CA/GPD2/HST7/TPK2/CAALFM_C402100CA/MPS1/PTK2/SPT14/CEK1/CAALFM_C601370WA/CDC19/SSK2/CAALFM_C505130CA/ADE2/GCN2/CDC7/SNF1/VPS15/FAB1/NPR1/CAALFM_C403130WA/AKL1/CAALFM_C207530CA/CAALFM_C105370CA/PKH3/GUA1/KIN3	34	18	3641127/3637922/3646526/3645575/3641407/3635594/3643482/3635641/3641019/3642789/3641144/3636459/3645897/3644040/3635766/3637921/3645205/3642481	16	3638966/3637393/3644563/3640953/3641888/3641611/3641607/3643438/3635259/3643424/3642643/3639498/3641237/3646075/3634763/3641199
BP	GO:0006793	phosphorus metabolic process	34/462	190/1862	0.993557	0.997286	3638966/3641127/3637922/3637393/3646526/3645575/3641407/3635594/3644563/3640953/3643482/3635641/3641888/3641611/3641019/3642789/3641607/3643438/3641144/3636459/3635259/3645897/3643424/3642643/3644040/3635766/3639498/3637921/3641237/3645205/3642481/3646075/3634763/3641199	INO1/CAALFM_C404460CA/BUB1/HOG1/PPS1/GWT1/CYR1/CAALFM_C401820CA/GPD2/HST7/TPK2/CAALFM_C402100CA/MPS1/PTK2/SPT14/CEK1/CAALFM_C601370WA/CDC19/SSK2/CAALFM_C505130CA/ADE2/GCN2/CDC7/SNF1/VPS15/FAB1/NPR1/CAALFM_C403130WA/AKL1/CAALFM_C207530CA/CAALFM_C105370CA/PKH3/GUA1/KIN3	34	18	3641127/3637922/3646526/3645575/3641407/3635594/3643482/3635641/3641019/3642789/3641144/3636459/3645897/3644040/3635766/3637921/3645205/3642481	16	3638966/3637393/3644563/3640953/3641888/3641611/3641607/3643438/3635259/3643424/3642643/3639498/3641237/3646075/3634763/3641199
BP	GO:0090304	nucleic acid metabolic process	87/462	427/1862	0.994063	0.997286	30515250/3639333/3636831/3645124/3645198/3635694/3645095/3635666/3645956/3642498/3640285/3635631/3634894/3641128/3636401/3635729/3637926/3638917/3648179/3639254/3642989/3645737/3637727/3640121/3645324/3647593/3642939/3634775/3647851/3647677/3635700/3637887/3640275/3644034/3647882/3640512/3645332/3641886/3645137/3648211/3642929/3635677/3644103/3637862/3643511/3637913/3638029/3636516/3637776/364445…	MED20/UGA32/MST1/CAALFM_CR03110WA/TAF4/ZCF25/CAALFM_CR03330WA/ZCF26/ILS1/SFL1/ALA1/ZCF27/LYS143/SRB8/CAALFM_C505350WA/HAP42/CAALFM_C403090WA/CAALFM_CR10180WA/SPB1/POL5/RNR1/CAALFM_CR06960WA/ZCF22/FRS1/CAS1/CAALFM_CR05550CA/MSH2/ARG81/CAALFM_C403830WA/RPA190/CAALFM_C401280CA/CAALFM_C403290WA/NAM2/TOP1/THS1/LYS144/GAR1/UGA33/CAALFM_CR03400WA/MED5/EXM2/CAALFM_C400940WA/MED18/ARG83/AFT2/CAALFM_C40259…	87	41	30515250/3639333/3645198/3635694/3635666/3635631/3641128/3636401/3637926/3638917/3645737/3637727/3645324/3642939/3647851/3635700/3637887/3640512/3648211/3642929/3635677/3644103/3637862/3637913/3644456/3641808/3637418/3635845/3646859/3642927/3646519/3647134/3640745/3637896/3641794/3642252/3641244/3637918/3639690/3638515/3638903	46	3636831/3645124/3645095/3645956/3642498/3640285/3634894/3635729/3648179/3639254/3642989/3640121/3647593/3634775/3647677/3640275/3644034/3647882/3645332/3641886/3645137/3643511/3638029/3636516/3637776/3647757/3636398/3645881/3635834/3645129/3643481/3640128/3640722/3637996/3635757/3643427/3643755/3639378/3641916/3638486/3647682/3639245/3638502/3640232/3639303/3644399
BP	GO:0009144	purine nucleoside triphosphate metabolic process	1/462	18/1862	0.994261	0.997286	3643438	CDC19	1	0		1	3643438
BP	GO:0009199	ribonucleoside triphosphate metabolic process	1/462	18/1862	0.994261	0.997286	3643438	CDC19	1	0		1	3643438
BP	GO:0009205	purine ribonucleoside triphosphate metabolic process	1/462	18/1862	0.994261	0.997286	3643438	CDC19	1	0		1	3643438
BP	GO:0046034	ATP metabolic process	1/462	18/1862	0.994261	0.997286	3643438	CDC19	1	0		1	3643438
BP	GO:0009141	nucleoside triphosphate metabolic process	1/462	19/1862	0.995699	0.997286	3643438	CDC19	1	0		1	3643438
BP	GO:0008033	tRNA processing	2/462	27/1862	0.995714	0.997286	3635677/3644399	CAALFM_C400940WA/CAALFM_C111160CA	2	1	3635677	1	3644399
BP	GO:0010467	gene expression	87/462	434/1862	0.996821	0.997286	30515250/3639333/3636831/3645198/3635694/3645095/3635666/3645956/3642498/3640285/3641734/3635631/3639724/3634894/3639723/3641128/3635729/3637926/3648179/3639254/3646358/3637727/3640121/3643513/3647593/3634775/3647851/3647677/3635700/3639497/3640275/3647882/3640512/3641886/3640548/3641648/3645137/3648211/3642929/3635677/30515335/3642506/3644103/3646039/3637862/3643511/3638029/3636516/3637776/36418…	MED20/UGA32/MST1/TAF4/ZCF25/CAALFM_CR03330WA/ZCF26/ILS1/SFL1/ALA1/CAM1/ZCF27/MRPL6/LYS143/CAALFM_CR00490WA/SRB8/HAP42/CAALFM_C403090WA/SPB1/POL5/CAM1-1/ZCF22/FRS1/CAALFM_C207190CA/CAALFM_CR05550CA/ARG81/CAALFM_C403830WA/RPA190/CAALFM_C401280CA/MRPL19/NAM2/THS1/LYS144/UGA33/CAALFM_C300450CA/ANB1/CAALFM_CR03400WA/MED5/EXM2/CAALFM_C400940WA/RPL32/RSM22/MED18/MRPL8/ARG83/AFT2/GUS1/MES1/CTA7/CGT1/MSM1…	87	30	30515250/3639333/3645198/3635694/3635666/3635631/3641128/3637926/3637727/3647851/3635700/3640512/3648211/3642929/3635677/3644103/3637862/3641808/3637418/3635845/3646859/3647134/3640745/3641794/3642252/3641244/3637918/3639690/3638515/3638903	57	3636831/3645095/3645956/3642498/3640285/3641734/3639724/3634894/3639723/3635729/3648179/3639254/3646358/3640121/3643513/3647593/3634775/3647677/3639497/3640275/3647882/3641886/3640548/3641648/3645137/30515335/3642506/3646039/3643511/3638029/3636516/3637776/3636398/3645129/3643481/3640128/3640722/3637996/3635757/3643427/3643755/3636643/30515301/3639378/3641916/3637954/3638486/3643347/30515338/3640…
BP	GO:0006139	nucleobase-containing compound metabolic process	97/462	479/1862	0.997286	0.997286	3636649/30515250/3639333/3636831/3645124/3645198/3635694/3645095/3635666/3645956/3642498/3640285/3635631/3634894/3641769/3641128/3636401/3635729/3637926/3638917/3648179/3639254/3642989/3645737/3637727/3640121/3640719/3645324/3647593/3642939/3634775/3647851/3647677/3641407/3635594/3635700/3637887/3640275/3644034/3647882/3640512/3645332/3641886/3645137/3648211/3642929/3635677/3644103/3637862/364343…	URA3/MED20/UGA32/MST1/CAALFM_CR03110WA/TAF4/ZCF25/CAALFM_CR03330WA/ZCF26/ILS1/SFL1/ALA1/ZCF27/LYS143/ADE4/SRB8/CAALFM_C505350WA/HAP42/CAALFM_C403090WA/CAALFM_CR10180WA/SPB1/POL5/RNR1/CAALFM_CR06960WA/ZCF22/FRS1/ADE5%2C7/CAS1/CAALFM_CR05550CA/MSH2/ARG81/CAALFM_C403830WA/RPA190/CYR1/CAALFM_C401820CA/CAALFM_C401280CA/CAALFM_C403290WA/NAM2/TOP1/THS1/LYS144/GAR1/UGA33/CAALFM_CR03400WA/MED5/EXM2/CAALFM…	97	45	3636649/30515250/3639333/3645198/3635694/3635666/3635631/3641128/3636401/3637926/3638917/3645737/3637727/3645324/3642939/3647851/3641407/3635594/3635700/3637887/3640512/3648211/3642929/3635677/3644103/3637862/3637913/3636459/3644456/3641808/3637418/3635845/3646859/3642927/3646519/3647134/3640745/3637896/3641794/3642252/3641244/3637918/3639690/3638515/3638903	52	3636831/3645124/3645095/3645956/3642498/3640285/3634894/3641769/3635729/3648179/3639254/3642989/3640121/3640719/3647593/3634775/3647677/3640275/3644034/3647882/3645332/3641886/3645137/3643438/3635842/3643511/3638029/3636516/3637776/3647757/3635259/3636398/3645881/3635834/3645129/3643481/3640128/3640722/3637996/3635757/3643427/3643755/3639378/3641916/3638486/3647682/3639245/3638502/3640232/3639303…
CC	GO:0000502	proteasome complex	10/237	15/970	0.000589016	0.0285673	30515395/3638311/3646718/3640510/3643490/3641906/3643111/3636957/3636917/3643660	PRE6/PRE9/PUP3/SCL1/PRE2/PRE8/PRE5/PRE10/RPN3/PRE3	10	0		10	30515395/3638311/3646718/3640510/3643490/3641906/3643111/3636957/3636917/3643660
CC	GO:1905369	endopeptidase complex	10/237	15/970	0.000589016	0.0285673	30515395/3638311/3646718/3640510/3643490/3641906/3643111/3636957/3636917/3643660	PRE6/PRE9/PUP3/SCL1/PRE2/PRE8/PRE5/PRE10/RPN3/PRE3	10	0		10	30515395/3638311/3646718/3640510/3643490/3641906/3643111/3636957/3636917/3643660
CC	GO:0005839	proteasome core complex	9/237	14/970	0.00167248	0.0408844	30515395/3638311/3646718/3640510/3643490/3641906/3643111/3636957/3643660	PRE6/PRE9/PUP3/SCL1/PRE2/PRE8/PRE5/PRE10/PRE3	9	0		9	30515395/3638311/3646718/3640510/3643490/3641906/3643111/3636957/3643660
CC	GO:1905368	peptidase complex	11/237	19/970	0.00168595	0.0408844	30515395/3638311/3646718/3640510/3643490/3641906/3643111/3636957/3636917/3643660/3638515	PRE6/PRE9/PUP3/SCL1/PRE2/PRE8/PRE5/PRE10/RPN3/PRE3/CAALFM_C307050WA	11	1	3638515	10	30515395/3638311/3646718/3640510/3643490/3641906/3643111/3636957/3636917/3643660
CC	GO:0016021	integral component of membrane	66/237	235/970	0.0803394	0.997405	3642793/3642278/3636130/3647071/3635860/3645111/3642824/3640573/3643652/3642614/3638884/3642635/3646404/3646565/3637844/3640993/3635201/3640165/3641932/3639256/3639530/3636156/3642962/3645575/3637401/3637036/3638876/3643769/3642288/3634898/3635641/3646508/3641214/3635202/3647389/3643964/3636860/3639549/3639260/3640941/3644867/3636600/3645361/3645360/3644055/3637919/3647141/3643928/3645969/3640307…	CAALFM_C406440CA/JEN1/DAL7/COX15/CAALFM_C202580WA/HGT18/CAALFM_C406370CA/NGT1/ATO5/SGE1/CAALFM_C200700WA/GIT4/HGT9/CAALFM_C206440CA/CAALFM_C402460WA/CAALFM_CR04280CA/HGT5/CAALFM_CR01340WA/CAALFM_CR09390CA/MDL2/CAALFM_C106860WA/CAALFM_C112930CA/YDC1/GWT1/CAALFM_C203800CA/CAALFM_C701600WA/HGT7/CAALFM_C502040WA/HST6/CAALFM_C109220WA/CAALFM_C402100CA/VCX1/JEN2/CAALFM_C305280CA/CDR11/YOR1/SEC62/CAALFM…	66	36	3642793/3642278/3636130/3635860/3645111/3642824/3640573/3642635/3646404/3637844/3640993/3635201/3640165/3641932/3639530/3636156/3642962/3645575/3637401/3642288/3634898/3635641/3646508/3641214/3639549/3645361/3645360/3637919/3643928/3646857/3637701/3642821/3635858/3639845/3637921/3634844	30	3647071/3643652/3642614/3638884/3646565/3639256/3637036/3638876/3643769/3635202/3647389/3643964/3636860/3639260/3640941/3644867/3636600/3644055/3647141/3645969/3640307/3638948/3647077/3640290/3644023/3646284/3646509/3638396/3641625/3636394
CC	GO:0031224	intrinsic component of membrane	66/237	235/970	0.0803394	0.997405	3642793/3642278/3636130/3647071/3635860/3645111/3642824/3640573/3643652/3642614/3638884/3642635/3646404/3646565/3637844/3640993/3635201/3640165/3641932/3639256/3639530/3636156/3642962/3645575/3637401/3637036/3638876/3643769/3642288/3634898/3635641/3646508/3641214/3635202/3647389/3643964/3636860/3639549/3639260/3640941/3644867/3636600/3645361/3645360/3644055/3637919/3647141/3643928/3645969/3640307…	CAALFM_C406440CA/JEN1/DAL7/COX15/CAALFM_C202580WA/HGT18/CAALFM_C406370CA/NGT1/ATO5/SGE1/CAALFM_C200700WA/GIT4/HGT9/CAALFM_C206440CA/CAALFM_C402460WA/CAALFM_CR04280CA/HGT5/CAALFM_CR01340WA/CAALFM_CR09390CA/MDL2/CAALFM_C106860WA/CAALFM_C112930CA/YDC1/GWT1/CAALFM_C203800CA/CAALFM_C701600WA/HGT7/CAALFM_C502040WA/HST6/CAALFM_C109220WA/CAALFM_C402100CA/VCX1/JEN2/CAALFM_C305280CA/CDR11/YOR1/SEC62/CAALFM…	66	36	3642793/3642278/3636130/3635860/3645111/3642824/3640573/3642635/3646404/3637844/3640993/3635201/3640165/3641932/3639530/3636156/3642962/3645575/3637401/3642288/3634898/3635641/3646508/3641214/3639549/3645361/3645360/3637919/3643928/3646857/3637701/3642821/3635858/3639845/3637921/3634844	30	3647071/3643652/3642614/3638884/3646565/3639256/3637036/3638876/3643769/3635202/3647389/3643964/3636860/3639260/3640941/3644867/3636600/3644055/3647141/3645969/3640307/3638948/3647077/3640290/3644023/3646284/3646509/3638396/3641625/3636394
CC	GO:1902494	catalytic complex	21/237	71/970	0.181791	0.997405	3645874/3645198/3636473/30515395/3638311/3637926/3646718/3640510/3639383/3643490/3641906/3643111/3640410/3636957/3643928/3641896/3639844/3637921/3636917/3643660/3638515	CAALFM_C602300CA/TAF4/CAALFM_C505260WA/PRE6/PRE9/CAALFM_C403090WA/PUP3/SCL1/APC1/PRE2/PRE8/PRE5/GSL2/PRE10/CAALFM_C210200WA/CAALFM_CR09490WA/GSL1/CAALFM_C403130WA/RPN3/PRE3/CAALFM_C307050WA	21	10	3645198/3636473/3637926/3639383/3640410/3643928/3641896/3639844/3637921/3638515	11	3645874/30515395/3638311/3646718/3640510/3643490/3641906/3643111/3636957/3636917/3643660
CC	GO:0044427	chromosomal part	13/237	43/970	0.230539	0.997405	3638037/3635656/3645737/3640732/3644707/3645658/30515358/3644120/3637913/3643783/3641896/3641815/3640172	DCC1/ASK1/CAALFM_CR06960WA/CAALFM_C108150CA/HHT21/HTA1/HHO1/CTF8/CAALFM_C402590CA/MTW1/CAALFM_CR09490WA/BRN1/CAALFM_C101070CA	13	10	3638037/3635656/3645737/3640732/30515358/3637913/3643783/3641896/3641815/3640172	3	3644707/3645658/3644120
CC	GO:0016020	membrane	119/237	465/970	0.232363	0.997405	3642793/3642278/3645365/3645373/3636130/3647071/3636968/3635860/3641116/3645111/3642824/3640573/3643652/3642614/3647667/3636511/3638884/3642635/3646404/3646565/3637844/3636834/3640993/3635201/3640165/3638855/3641932/3639256/3637426/3639530/3639546/3636156/3643662/3642962/3645575/3637401/3637036/3638876/3643769/3642288/3634898/3635641/3646508/3641214/3647066/3635202/3647389/3643964/3640089/3635662…	CAALFM_C406440CA/JEN1/CDR3/CAALFM_C403560WA/DAL7/COX15/TOM40/CAALFM_C202580WA/PMT6/HGT18/CAALFM_C406370CA/NGT1/ATO5/SGE1/CAALFM_C105120WA/CAALFM_C504580CA/CAALFM_C200700WA/GIT4/HGT9/CAALFM_C206440CA/CAALFM_C402460WA/CAALFM_C102960CA/CAALFM_CR04280CA/HGT5/CAALFM_CR01340WA/CAALFM_C200550WA/CAALFM_CR09390CA/MDL2/CAALFM_C203910CA/CAALFM_C106860WA/HAK1/CAALFM_C112930CA/GAP2/YDC1/GWT1/CAALFM_C203800CA/…	119	72	3642793/3642278/3645365/3645373/3636130/3635860/3641116/3645111/3642824/3640573/3647667/3636511/3642635/3646404/3637844/3636834/3640993/3635201/3640165/3638855/3641932/3639530/3639546/3636156/3643662/3642962/3645575/3637401/3642288/3634898/3635641/3646508/3641214/3640089/3635662/3639894/3642303/3636142/3644698/3643029/3640410/3639549/3642785/3645361/3647671/3645360/3646954/3636801/3639870/3637919…	47	3647071/3636968/3643652/3642614/3638884/3646565/3639256/3637426/3637036/3638876/3643769/3647066/3635202/3647389/3643964/3645870/3638865/3636860/3639260/3637382/3640941/3644867/3641607/3636600/3645443/3638983/3644055/3647141/3645969/3636547/3640307/3638948/3638943/3645794/3636817/3644035/3647077/3640290/3644023/3646284/3640957/3646509/3638396/3641636/3647397/3641625/3636394
CC	GO:0044425	membrane part	77/237	297/970	0.260798	0.997405	3642793/3642278/3645373/3636130/3647071/3635860/3645111/3642824/3640573/3643652/3642614/3636511/3638884/3642635/3646404/3646565/3637844/3640993/3635201/3640165/3641932/3639256/3639530/3636156/3642962/3645575/3637401/3637036/3638876/3643769/3642288/3634898/3635641/3646508/3641214/3635202/3647389/3643964/3635662/3645870/3640410/3636860/3639549/3639260/3640941/3644867/3641607/3636600/3645361/3645360…	CAALFM_C406440CA/JEN1/CAALFM_C403560WA/DAL7/COX15/CAALFM_C202580WA/HGT18/CAALFM_C406370CA/NGT1/ATO5/SGE1/CAALFM_C504580CA/CAALFM_C200700WA/GIT4/HGT9/CAALFM_C206440CA/CAALFM_C402460WA/CAALFM_CR04280CA/HGT5/CAALFM_CR01340WA/CAALFM_CR09390CA/MDL2/CAALFM_C106860WA/CAALFM_C112930CA/YDC1/GWT1/CAALFM_C203800CA/CAALFM_C701600WA/HGT7/CAALFM_C502040WA/HST6/CAALFM_C109220WA/CAALFM_C402100CA/VCX1/JEN2/CAALFM…	77	43	3642793/3642278/3645373/3636130/3635860/3645111/3642824/3640573/3636511/3642635/3646404/3637844/3640993/3635201/3640165/3641932/3639530/3636156/3642962/3645575/3637401/3642288/3634898/3635641/3646508/3641214/3635662/3640410/3639549/3645361/3645360/3637919/3643928/3646857/3637701/3642821/3635858/3640111/3639845/3639844/3637921/3634844/30515402	34	3647071/3643652/3642614/3638884/3646565/3639256/3637036/3638876/3643769/3635202/3647389/3643964/3645870/3636860/3639260/3640941/3644867/3641607/3636600/3644055/3647141/3645969/3640307/3638948/3645794/3636817/3647077/3640290/3644023/3646284/3646509/3638396/3641625/3636394
CC	GO:0044815	DNA packaging complex	4/237	11/970	0.270422	0.997405	3644707/3645658/30515358/3641815	HHT21/HTA1/HHO1/BRN1	4	2	30515358/3641815	2	3644707/3645658
CC	GO:0016592	mediator complex	7/237	22/970	0.277075	0.997405	30515250/3641128/3648211/3644103/3637418/3635845/3646859	MED20/SRB8/MED5/MED18/MED1/SRB9/SOH1	7	7	30515250/3641128/3648211/3644103/3637418/3635845/3646859	0
CC	GO:0071944	cell periphery	7/237	22/970	0.277075	0.997405	3648085/3646845/3635662/3640410/3642806/3637004/3639844	CAALFM_C406130WA/SEC15/CLC1/GSL2/SEC3/FMP45/GSL1	7	7	3648085/3646845/3635662/3640410/3642806/3637004/3639844	0
CC	GO:0098588	bounding membrane of organelle	9/237	30/970	0.298023	0.997405	3642793/3636968/3636511/3637401/3635662/3644698/3645794/3636817/30515402	CAALFM_C406440CA/TOM40/CAALFM_C504580CA/CAALFM_C203800CA/CLC1/POR1/VPS28/TOM20/VMA13	9	6	3642793/3636511/3637401/3635662/3644698/30515402	3	3636968/3645794/3636817
CC	GO:0044422	organelle part	54/237	208/970	0.310496	0.997405	3642793/30515250/3636968/3645874/3645198/3636511/3638037/3641128/3637926/3639254/3636834/3635656/3645737/3637401/3639383/3640732/3643103/3644707/3645351/3635662/3645658/3648211/3642929/3644698/3636860/30515358/3644103/3644120/3641607/3635665/3637913/3646043/3644105/3643928/3637418/3643783/3640307/3635845/3641896/3646859/3647134/3647413/3638943/3645794/3636415/3636817/3637921/3640957/3641815/36460…	CAALFM_C406440CA/MED20/TOM40/CAALFM_C602300CA/TAF4/CAALFM_C504580CA/DCC1/SRB8/CAALFM_C403090WA/POL5/CAALFM_C102960CA/ASK1/CAALFM_CR06960WA/CAALFM_C203800CA/APC1/CAALFM_C108150CA/MAM33/HHT21/NUP84/CLC1/HTA1/MED5/EXM2/POR1/SEC62/HHO1/MED18/CTF8/CAALFM_C601370WA/CAALFM_C401950WA/CAALFM_C402590CA/ARC15/PES1/CAALFM_C210200WA/MED1/MTW1/ORM1/SRB9/CAALFM_CR09490WA/SOH1/CAALFM_C600640CA/CAALFM_C405180CA/C…	54	38	3642793/30515250/3645198/3636511/3638037/3641128/3637926/3636834/3635656/3645737/3637401/3639383/3640732/3645351/3635662/3648211/3642929/3644698/30515358/3644103/3635665/3637913/3646043/3643928/3637418/3643783/3635845/3641896/3646859/3647134/3647413/3636415/3637921/3641815/3638515/3638903/30515402/3640172	16	3636968/3645874/3639254/3643103/3644707/3645658/3636860/3644120/3641607/3644105/3640307/3638943/3645794/3636817/3640957/3646057
CC	GO:0044446	intracellular organelle part	54/237	208/970	0.310496	0.997405	3642793/30515250/3636968/3645874/3645198/3636511/3638037/3641128/3637926/3639254/3636834/3635656/3645737/3637401/3639383/3640732/3643103/3644707/3645351/3635662/3645658/3648211/3642929/3644698/3636860/30515358/3644103/3644120/3641607/3635665/3637913/3646043/3644105/3643928/3637418/3643783/3640307/3635845/3641896/3646859/3647134/3647413/3638943/3645794/3636415/3636817/3637921/3640957/3641815/36460…	CAALFM_C406440CA/MED20/TOM40/CAALFM_C602300CA/TAF4/CAALFM_C504580CA/DCC1/SRB8/CAALFM_C403090WA/POL5/CAALFM_C102960CA/ASK1/CAALFM_CR06960WA/CAALFM_C203800CA/APC1/CAALFM_C108150CA/MAM33/HHT21/NUP84/CLC1/HTA1/MED5/EXM2/POR1/SEC62/HHO1/MED18/CTF8/CAALFM_C601370WA/CAALFM_C401950WA/CAALFM_C402590CA/ARC15/PES1/CAALFM_C210200WA/MED1/MTW1/ORM1/SRB9/CAALFM_CR09490WA/SOH1/CAALFM_C600640CA/CAALFM_C405180CA/C…	54	38	3642793/30515250/3645198/3636511/3638037/3641128/3637926/3636834/3635656/3645737/3637401/3639383/3640732/3645351/3635662/3648211/3642929/3644698/30515358/3644103/3635665/3637913/3646043/3643928/3637418/3643783/3635845/3641896/3646859/3647134/3647413/3636415/3637921/3641815/3638515/3638903/30515402/3640172	16	3636968/3645874/3639254/3643103/3644707/3645658/3636860/3644120/3641607/3644105/3640307/3638943/3645794/3636817/3640957/3646057
CC	GO:0012505	endomembrane system	17/237	62/970	0.333102	0.997405	3642793/3636457/3636511/3637401/3635692/3641898/3645351/3635662/3636860/3641607/3643928/3640307/3647413/3645794/3637921/3640957/3638515	CAALFM_C406440CA/TIP20/CAALFM_C504580CA/CAALFM_C203800CA/CAALFM_C402240CA/PHO88/NUP84/CLC1/SEC62/CAALFM_C601370WA/CAALFM_C210200WA/ORM1/CAALFM_C405180CA/VPS28/CAALFM_C403130WA/CAALFM_CR03930CA/CAALFM_C307050WA	17	11	3642793/3636457/3636511/3637401/3635692/3645351/3635662/3643928/3647413/3637921/3638515	6	3641898/3636860/3641607/3640307/3645794/3640957
CC	GO:0031984	organelle subcompartment	7/237	24/970	0.366605	0.997405	3642793/3637401/3636860/3641607/3643928/3640307/3637921	CAALFM_C406440CA/CAALFM_C203800CA/SEC62/CAALFM_C601370WA/CAALFM_C210200WA/ORM1/CAALFM_C403130WA	7	4	3642793/3637401/3643928/3637921	3	3636860/3641607/3640307
CC	GO:0044428	nuclear part	23/237	88/970	0.391019	0.997405	30515250/3645874/3645198/3641128/3637926/3639254/3635656/3639383/3645351/3648211/3642929/3644103/3637913/3644105/3637418/3635845/3641896/3646859/3647134/3647413/3640957/3638515/3638903	MED20/CAALFM_C602300CA/TAF4/SRB8/CAALFM_C403090WA/POL5/ASK1/APC1/NUP84/MED5/EXM2/MED18/CAALFM_C402590CA/PES1/MED1/SRB9/CAALFM_CR09490WA/SOH1/CAALFM_C600640CA/CAALFM_C405180CA/CAALFM_CR03930CA/CAALFM_C307050WA/CAALFM_C200200WA	23	19	30515250/3645198/3641128/3637926/3635656/3639383/3645351/3648211/3642929/3644103/3637913/3637418/3635845/3641896/3646859/3647134/3647413/3638515/3638903	4	3645874/3639254/3644105/3640957
CC	GO:0005694	chromosome	14/237	53/970	0.418766	0.997405	3638037/3635656/3645737/3640732/3644707/3644034/3645658/30515358/3644120/3637913/3643783/3641896/3641815/3640172	DCC1/ASK1/CAALFM_CR06960WA/CAALFM_C108150CA/HHT21/TOP1/HTA1/HHO1/CTF8/CAALFM_C402590CA/MTW1/CAALFM_CR09490WA/BRN1/CAALFM_C101070CA	14	10	3638037/3635656/3645737/3640732/30515358/3637913/3643783/3641896/3641815/3640172	4	3644707/3644034/3645658/3644120
CC	GO:0005654	nucleoplasm	11/237	42/970	0.45384	0.997405	30515250/3645198/3641128/3637926/3648211/3644103/3637418/3635845/3641896/3646859/3638515	MED20/TAF4/SRB8/CAALFM_C403090WA/MED5/MED18/MED1/SRB9/CAALFM_CR09490WA/SOH1/CAALFM_C307050WA	11	11	30515250/3645198/3641128/3637926/3648211/3644103/3637418/3635845/3641896/3646859/3638515	0
CC	GO:0044451	nucleoplasm part	11/237	42/970	0.45384	0.997405	30515250/3645198/3641128/3637926/3648211/3644103/3637418/3635845/3641896/3646859/3638515	MED20/TAF4/SRB8/CAALFM_C403090WA/MED5/MED18/MED1/SRB9/CAALFM_CR09490WA/SOH1/CAALFM_C307050WA	11	11	30515250/3645198/3641128/3637926/3648211/3644103/3637418/3635845/3641896/3646859/3638515	0
CC	GO:0000786	nucleosome	3/237	10/970	0.457629	0.997405	3644707/3645658/30515358	HHT21/HTA1/HHO1	3	1	30515358	2	3644707/3645658
CC	GO:0015629	actin cytoskeleton	3/237	10/970	0.457629	0.997405	3635665/3646043/3636415	CAALFM_C401950WA/ARC15/CAALFM_C504890CA	3	3	3635665/3646043/3636415	0
CC	GO:0044459	plasma membrane part	3/237	10/970	0.457629	0.997405	3635662/3640410/3639844	CLC1/GSL2/GSL1	3	3	3635662/3640410/3639844	0
CC	GO:0098805	whole membrane	7/237	26/970	0.457839	0.997405	3636968/3636511/3635662/3644698/3645794/3636817/30515402	TOM40/CAALFM_C504580CA/CLC1/POR1/VPS28/TOM20/VMA13	7	4	3636511/3635662/3644698/30515402	3	3636968/3645794/3636817
CC	GO:0000785	chromatin	4/237	14/970	0.458939	0.997405	3644707/3645658/30515358/3641896	HHT21/HTA1/HHO1/CAALFM_CR09490WA	4	2	30515358/3641896	2	3644707/3645658
CC	GO:0005783	endoplasmic reticulum	8/237	31/970	0.498753	0.997405	3636457/3635692/3641898/3636860/3641607/3643928/3640307/3637921	TIP20/CAALFM_C402240CA/PHO88/SEC62/CAALFM_C601370WA/CAALFM_C210200WA/ORM1/CAALFM_C403130WA	8	4	3636457/3635692/3643928/3637921	4	3641898/3636860/3641607/3640307
CC	GO:0032993	protein-DNA complex	3/237	11/970	0.527831	0.997405	3644707/3645658/30515358	HHT21/HTA1/HHO1	3	1	30515358	2	3644707/3645658
CC	GO:0000775	chromosome, centromeric region	4/237	16/970	0.575631	0.997405	3635656/3640732/3643783/3640172	ASK1/CAALFM_C108150CA/MTW1/CAALFM_C101070CA	4	4	3635656/3640732/3643783/3640172	0
CC	GO:0005886	plasma membrane	4/237	16/970	0.575631	0.997405	3635662/3640410/3637004/3639844	CLC1/GSL2/FMP45/GSL1	4	4	3635662/3640410/3637004/3639844	0
CC	GO:0031974	membrane-enclosed lumen	17/237	71/970	0.588202	0.997405	30515250/3645198/3641128/3637926/3639254/3635656/3643103/3648211/3644103/3637913/3644105/3637418/3635845/3641896/3646859/3646057/3638515	MED20/TAF4/SRB8/CAALFM_C403090WA/POL5/ASK1/MAM33/MED5/MED18/CAALFM_C402590CA/PES1/MED1/SRB9/CAALFM_CR09490WA/SOH1/CAALFM_CR07320CA/CAALFM_C307050WA	17	13	30515250/3645198/3641128/3637926/3635656/3648211/3644103/3637913/3637418/3635845/3641896/3646859/3638515	4	3639254/3643103/3644105/3646057
CC	GO:0043233	organelle lumen	17/237	71/970	0.588202	0.997405	30515250/3645198/3641128/3637926/3639254/3635656/3643103/3648211/3644103/3637913/3644105/3637418/3635845/3641896/3646859/3646057/3638515	MED20/TAF4/SRB8/CAALFM_C403090WA/POL5/ASK1/MAM33/MED5/MED18/CAALFM_C402590CA/PES1/MED1/SRB9/CAALFM_CR09490WA/SOH1/CAALFM_CR07320CA/CAALFM_C307050WA	17	13	30515250/3645198/3641128/3637926/3635656/3648211/3644103/3637913/3637418/3635845/3641896/3646859/3638515	4	3639254/3643103/3644105/3646057
CC	GO:0070013	intracellular organelle lumen	17/237	71/970	0.588202	0.997405	30515250/3645198/3641128/3637926/3639254/3635656/3643103/3648211/3644103/3637913/3644105/3637418/3635845/3641896/3646859/3646057/3638515	MED20/TAF4/SRB8/CAALFM_C403090WA/POL5/ASK1/MAM33/MED5/MED18/CAALFM_C402590CA/PES1/MED1/SRB9/CAALFM_CR09490WA/SOH1/CAALFM_CR07320CA/CAALFM_C307050WA	17	13	30515250/3645198/3641128/3637926/3635656/3648211/3644103/3637913/3637418/3635845/3641896/3646859/3638515	4	3639254/3643103/3644105/3646057
CC	GO:0005794	Golgi apparatus	3/237	12/970	0.592697	0.997405	3642793/3637401/3635662	CAALFM_C406440CA/CAALFM_C203800CA/CLC1	3	3	3642793/3637401/3635662	0
CC	GO:0044431	Golgi apparatus part	3/237	12/970	0.592697	0.997405	3642793/3637401/3635662	CAALFM_C406440CA/CAALFM_C203800CA/CLC1	3	3	3642793/3637401/3635662	0
CC	GO:0098687	chromosomal region	4/237	17/970	0.628369	0.997405	3635656/3640732/3643783/3640172	ASK1/CAALFM_C108150CA/MTW1/CAALFM_C101070CA	4	4	3635656/3640732/3643783/3640172	0
CC	GO:0031967	organelle envelope	9/237	39/970	0.642299	0.997405	3636968/3636834/3645351/3644698/3647413/3638943/3636817/3640957/3638515	TOM40/CAALFM_C102960CA/NUP84/POR1/CAALFM_C405180CA/CAALFM_CR10760CA/TOM20/CAALFM_CR03930CA/CAALFM_C307050WA	9	5	3636834/3645351/3644698/3647413/3638515	4	3636968/3638943/3636817/3640957
CC	GO:0031975	envelope	9/237	39/970	0.642299	0.997405	3636968/3636834/3645351/3644698/3647413/3638943/3636817/3640957/3638515	TOM40/CAALFM_C102960CA/NUP84/POR1/CAALFM_C405180CA/CAALFM_CR10760CA/TOM20/CAALFM_CR03930CA/CAALFM_C307050WA	9	5	3636834/3645351/3644698/3647413/3638515	4	3636968/3638943/3636817/3640957
CC	GO:1990234	transferase complex	8/237	35/970	0.653023	0.997405	3645874/3645198/3637926/3639383/3640410/3643928/3639844/3638515	CAALFM_C602300CA/TAF4/CAALFM_C403090WA/APC1/GSL2/CAALFM_C210200WA/GSL1/CAALFM_C307050WA	8	7	3645198/3637926/3639383/3640410/3643928/3639844/3638515	1	3645874
CC	GO:0005789	endoplasmic reticulum membrane	5/237	22/970	0.656553	0.997405	3636860/3641607/3643928/3640307/3637921	SEC62/CAALFM_C601370WA/CAALFM_C210200WA/ORM1/CAALFM_C403130WA	5	2	3643928/3637921	3	3636860/3641607/3640307
CC	GO:0042175	nuclear outer membrane-endoplasmic reticulum membrane network	5/237	22/970	0.656553	0.997405	3636860/3641607/3643928/3640307/3637921	SEC62/CAALFM_C601370WA/CAALFM_C210200WA/ORM1/CAALFM_C403130WA	5	2	3643928/3637921	3	3636860/3641607/3640307
CC	GO:0098827	endoplasmic reticulum subcompartment	5/237	22/970	0.656553	0.997405	3636860/3641607/3643928/3640307/3637921	SEC62/CAALFM_C601370WA/CAALFM_C210200WA/ORM1/CAALFM_C403130WA	5	2	3643928/3637921	3	3636860/3641607/3640307
CC	GO:0044432	endoplasmic reticulum part	5/237	23/970	0.698088	0.997405	3636860/3641607/3643928/3640307/3637921	SEC62/CAALFM_C601370WA/CAALFM_C210200WA/ORM1/CAALFM_C403130WA	5	2	3643928/3637921	3	3636860/3641607/3640307
CC	GO:0031090	organelle membrane	12/237	54/970	0.703267	0.997405	3642793/3636968/3636511/3636834/3637401/3635662/3644698/3638943/3645794/3636817/3640957/30515402	CAALFM_C406440CA/TOM40/CAALFM_C504580CA/CAALFM_C102960CA/CAALFM_C203800CA/CLC1/POR1/CAALFM_CR10760CA/VPS28/TOM20/CAALFM_CR03930CA/VMA13	12	7	3642793/3636511/3636834/3637401/3635662/3644698/30515402	5	3636968/3638943/3645794/3636817/3640957
CC	GO:0031981	nuclear lumen	15/237	67/970	0.703751	0.997405	30515250/3645198/3641128/3637926/3639254/3635656/3648211/3644103/3637913/3644105/3637418/3635845/3641896/3646859/3638515	MED20/TAF4/SRB8/CAALFM_C403090WA/POL5/ASK1/MED5/MED18/CAALFM_C402590CA/PES1/MED1/SRB9/CAALFM_CR09490WA/SOH1/CAALFM_C307050WA	15	13	30515250/3645198/3641128/3637926/3635656/3648211/3644103/3637913/3637418/3635845/3641896/3646859/3638515	2	3639254/3644105
CC	GO:0005739	mitochondrion	9/237	42/970	0.735306	0.997405	3636968/3636834/30515038/3643103/3644698/3642019/3638943/3636817/3646057	TOM40/CAALFM_C102960CA/PET100/MAM33/POR1/CAALFM_C112280CA/CAALFM_CR10760CA/TOM20/CAALFM_CR07320CA	9	2	3636834/3644698	7	3636968/30515038/3643103/3642019/3638943/3636817/3646057
CC	GO:0000428	DNA-directed RNA polymerase complex	2/237	10/970	0.744412	0.997405	3645198/3637926	TAF4/CAALFM_C403090WA	2	2	3645198/3637926	0
CC	GO:0030684	preribosome	2/237	10/970	0.744412	0.997405	3635757/3638502	UTP21/CAALFM_C306760WA	2	0		2	3635757/3638502
CC	GO:0055029	nuclear DNA-directed RNA polymerase complex	2/237	10/970	0.744412	0.997405	3645198/3637926	TAF4/CAALFM_C403090WA	2	2	3645198/3637926	0
CC	GO:0000776	kinetochore	3/237	15/970	0.750326	0.997405	3635656/3640732/3640172	ASK1/CAALFM_C108150CA/CAALFM_C101070CA	3	3	3635656/3640732/3640172	0
CC	GO:0000793	condensed chromosome	3/237	15/970	0.750326	0.997405	3635656/3641815/3640172	ASK1/BRN1/CAALFM_C101070CA	3	3	3635656/3641815/3640172	0
CC	GO:0031410	cytoplasmic vesicle	3/237	15/970	0.750326	0.997405	3636511/3635662/3645794	CAALFM_C504580CA/CLC1/VPS28	3	2	3636511/3635662	1	3645794
CC	GO:0031982	vesicle	3/237	15/970	0.750326	0.997405	3636511/3635662/3645794	CAALFM_C504580CA/CLC1/VPS28	3	2	3636511/3635662	1	3645794
CC	GO:0044433	cytoplasmic vesicle part	3/237	15/970	0.750326	0.997405	3636511/3635662/3645794	CAALFM_C504580CA/CLC1/VPS28	3	2	3636511/3635662	1	3645794
CC	GO:0097708	intracellular vesicle	3/237	15/970	0.750326	0.997405	3636511/3635662/3645794	CAALFM_C504580CA/CLC1/VPS28	3	2	3636511/3635662	1	3645794
CC	GO:0005856	cytoskeleton	4/237	20/970	0.759913	0.997405	3635656/3635665/3646043/3636415	ASK1/CAALFM_C401950WA/ARC15/CAALFM_C504890CA	4	4	3635656/3635665/3646043/3636415	0
CC	GO:0044430	cytoskeletal part	4/237	20/970	0.759913	0.997405	3635656/3635665/3646043/3636415	ASK1/CAALFM_C401950WA/ARC15/CAALFM_C504890CA	4	4	3635656/3635665/3646043/3636415	0
CC	GO:0044429	mitochondrial part	7/237	34/970	0.763647	0.997405	3636968/3636834/3643103/3644698/3638943/3636817/3646057	TOM40/CAALFM_C102960CA/MAM33/POR1/CAALFM_CR10760CA/TOM20/CAALFM_CR07320CA	7	2	3636834/3644698	5	3636968/3643103/3638943/3636817/3646057
CC	GO:0032991	protein-containing complex	76/237	328/970	0.767556	0.997405	30515250/3645373/3645874/30515262/3645198/3636473/30515395/3636511/3646845/3639724/3638311/3639723/3638037/3641128/3637926/3641383/3635656/3645737/3646718/3640510/3643513/3639383/3640732/3644707/3639497/3643490/3645351/3635662/3641906/3645870/3640548/3645658/3648211/3642929/3635677/30515335/3643111/3640410/3642806/30515358/3644103/3644120/3636957/3646039/3635665/3637913/3646043/3643928/3637418/36…	MED20/CAALFM_C403560WA/CAALFM_C602300CA/CAALFM_C403930CA/TAF4/CAALFM_C505260WA/PRE6/CAALFM_C504580CA/SEC15/MRPL6/PRE9/CAALFM_CR00490WA/DCC1/SRB8/CAALFM_C403090WA/CAALFM_C703000CA/ASK1/CAALFM_CR06960WA/PUP3/SCL1/CAALFM_C207190CA/APC1/CAALFM_C108150CA/HHT21/MRPL19/PRE2/NUP84/CLC1/PRE8/SEC27/CAALFM_C300450CA/HTA1/MED5/EXM2/CAALFM_C400940WA/RPL32/PRE5/GSL2/SEC3/HHO1/MED18/CTF8/PRE10/MRPL8/CAALFM_C401…	76	42	30515250/3645373/30515262/3645198/3636473/3636511/3646845/3638037/3641128/3637926/3635656/3645737/3639383/3640732/3645351/3635662/3648211/3642929/3635677/3640410/3642806/30515358/3644103/3635665/3637913/3646043/3643928/3637418/3635845/3641896/3646859/3647134/3647413/3636415/3640111/3639844/3637921/3641815/3638515/3638903/30515402/3640172	34	3645874/30515395/3639724/3638311/3639723/3641383/3646718/3640510/3643513/3644707/3639497/3643490/3641906/3645870/3640548/3645658/30515335/3643111/3644120/3636957/3646039/3645794/3635757/3636817/30515301/3637954/3644788/3643347/3636917/30515338/3640303/3638502/3646057/3643660
CC	GO:0000777	condensed chromosome kinetochore	2/237	11/970	0.792541	0.997405	3635656/3640172	ASK1/CAALFM_C101070CA	2	2	3635656/3640172	0
CC	GO:0000779	condensed chromosome, centromeric region	2/237	11/970	0.792541	0.997405	3635656/3640172	ASK1/CAALFM_C101070CA	2	2	3635656/3640172	0
CC	GO:0015630	microtubule cytoskeleton	2/237	11/970	0.792541	0.997405	3635656/3636415	ASK1/CAALFM_C504890CA	2	2	3635656/3636415	0
CC	GO:0099023	tethering complex	2/237	11/970	0.792541	0.997405	3646845/3642806	SEC15/SEC3	2	2	3646845/3642806	0
CC	GO:0030117	membrane coat	3/237	17/970	0.825412	0.997405	3645373/3635662/3645870	CAALFM_C403560WA/CLC1/SEC27	3	2	3645373/3635662	1	3645870
CC	GO:0048475	coated membrane	3/237	17/970	0.825412	0.997405	3645373/3635662/3645870	CAALFM_C403560WA/CLC1/SEC27	3	2	3645373/3635662	1	3645870
CC	GO:0043228	non-membrane-bounded organelle	33/237	152/970	0.829551	0.997405	3639724/3639723/3638037/3639254/3641383/3635656/3645737/3643513/3640732/3644707/3639497/3644034/3640548/3645658/30515335/30515358/3644120/3646039/3635665/3637913/3646043/3644105/3643783/3641896/3636415/30515301/3637954/3643347/3641815/30515338/3640303/3646057/3640172	MRPL6/CAALFM_CR00490WA/DCC1/POL5/CAALFM_C703000CA/ASK1/CAALFM_CR06960WA/CAALFM_C207190CA/CAALFM_C108150CA/HHT21/MRPL19/TOP1/CAALFM_C300450CA/HTA1/RPL32/HHO1/CTF8/MRPL8/CAALFM_C401950WA/CAALFM_C402590CA/ARC15/PES1/MTW1/CAALFM_CR09490WA/CAALFM_C504890CA/CAALFM_C501540WA/YML6/RPL4B/BRN1/RPL25/CAALFM_C603730CA/CAALFM_CR07320CA/CAALFM_C101070CA	33	13	3638037/3635656/3645737/3640732/30515358/3635665/3637913/3646043/3643783/3641896/3636415/3641815/3640172	20	3639724/3639723/3639254/3641383/3643513/3644707/3639497/3644034/3640548/3645658/30515335/3644120/3646039/3644105/30515301/3637954/3643347/30515338/3640303/3646057
CC	GO:0043232	intracellular non-membrane-bounded organelle	33/237	152/970	0.829551	0.997405	3639724/3639723/3638037/3639254/3641383/3635656/3645737/3643513/3640732/3644707/3639497/3644034/3640548/3645658/30515335/30515358/3644120/3646039/3635665/3637913/3646043/3644105/3643783/3641896/3636415/30515301/3637954/3643347/3641815/30515338/3640303/3646057/3640172	MRPL6/CAALFM_CR00490WA/DCC1/POL5/CAALFM_C703000CA/ASK1/CAALFM_CR06960WA/CAALFM_C207190CA/CAALFM_C108150CA/HHT21/MRPL19/TOP1/CAALFM_C300450CA/HTA1/RPL32/HHO1/CTF8/MRPL8/CAALFM_C401950WA/CAALFM_C402590CA/ARC15/PES1/MTW1/CAALFM_CR09490WA/CAALFM_C504890CA/CAALFM_C501540WA/YML6/RPL4B/BRN1/RPL25/CAALFM_C603730CA/CAALFM_CR07320CA/CAALFM_C101070CA	33	13	3638037/3635656/3645737/3640732/30515358/3635665/3637913/3646043/3643783/3641896/3636415/3641815/3640172	20	3639724/3639723/3639254/3641383/3643513/3644707/3639497/3644034/3640548/3645658/30515335/3644120/3646039/3644105/30515301/3637954/3643347/30515338/3640303/3646057
CC	GO:0030880	RNA polymerase complex	2/237	12/970	0.83251	0.997405	3645198/3637926	TAF4/CAALFM_C403090WA	2	2	3645198/3637926	0
CC	GO:0061695	transferase complex, transferring phosphorus-containing groups	2/237	13/970	0.865417	0.997405	3645198/3637926	TAF4/CAALFM_C403090WA	2	2	3645198/3637926	0
CC	GO:0031966	mitochondrial membrane	5/237	29/970	0.874632	0.997405	3636968/3636834/3644698/3638943/3636817	TOM40/CAALFM_C102960CA/POR1/CAALFM_CR10760CA/TOM20	5	2	3636834/3644698	3	3636968/3638943/3636817
CC	GO:0044454	nuclear chromosome part	3/237	19/970	0.880372	0.997405	3635656/3637913/3641896	ASK1/CAALFM_C402590CA/CAALFM_CR09490WA	3	3	3635656/3637913/3641896	0
CC	GO:0005737	cytoplasm	53/237	244/970	0.890577	0.997405	3642793/3645373/3648085/3636968/30515262/3636457/3636558/3640285/3636511/3646845/3639724/3642961/3639723/3636834/3641383/30515038/3643513/3637401/3635692/3641898/3643103/3639497/3635662/3645870/3640548/30515335/3644698/3642806/3636860/3641607/3646039/3638029/3643928/3642019/3640307/3638943/3645794/3643731/3644722/3647897/3636501/3636817/30515301/3637954/3643347/3637921/30515338/3640303/3646057/36…	CAALFM_C406440CA/CAALFM_C403560WA/CAALFM_C406130WA/TOM40/CAALFM_C403930CA/TIP20/PXP2/ALA1/CAALFM_C504580CA/SEC15/MRPL6/SEC10/CAALFM_CR00490WA/CAALFM_C102960CA/CAALFM_C703000CA/PET100/CAALFM_C207190CA/CAALFM_C203800CA/CAALFM_C402240CA/PHO88/MAM33/MRPL19/CLC1/SEC27/CAALFM_C300450CA/RPL32/POR1/SEC3/SEC62/CAALFM_C601370WA/MRPL8/GUS1/CAALFM_C210200WA/CAALFM_C112280CA/ORM1/CAALFM_CR10760CA/VPS28/RCY1/C…	53	20	3642793/3645373/3648085/30515262/3636457/3636558/3636511/3646845/3642961/3636834/3637401/3635692/3635662/3644698/3642806/3643928/3643731/3636501/3637921/30515402	33	3636968/3640285/3639724/3639723/3641383/30515038/3643513/3641898/3643103/3639497/3645870/3640548/30515335/3636860/3641607/3646039/3638029/3642019/3640307/3638943/3645794/3644722/3647897/3636817/30515301/3637954/3643347/30515338/3640303/3646057/3640232/3644399/3638335
CC	GO:0005740	mitochondrial envelope	5/237	30/970	0.893358	0.997405	3636968/3636834/3644698/3638943/3636817	TOM40/CAALFM_C102960CA/POR1/CAALFM_CR10760CA/TOM20	5	2	3636834/3644698	3	3636968/3638943/3636817
CC	GO:0098796	membrane protein complex	12/237	65/970	0.908034	0.997405	3645373/3636511/3635662/3645870/3640410/3643928/3645794/3636817/3640111/3639844/3637921/30515402	CAALFM_C403560WA/CAALFM_C504580CA/CLC1/SEC27/GSL2/CAALFM_C210200WA/VPS28/TOM20/VMA4/GSL1/CAALFM_C403130WA/VMA13	12	9	3645373/3636511/3635662/3640410/3643928/3640111/3639844/3637921/30515402	3	3645870/3645794/3636817
CC	GO:0005634	nucleus	53/237	247/970	0.911938	0.997405	30515250/3639333/3645874/3645198/3635694/3645095/3635666/3642498/3635631/3634894/3641128/3635729/3637926/3648179/3639254/3635656/3645737/3634796/3637727/3639383/3634775/3639714/3640512/3645351/3641886/3648211/3642929/30515358/3644103/3637862/3637913/3644105/3637776/3644456/3645129/3637418/3643783/3635845/3641896/3646859/3647134/3647413/3640745/3637996/3644722/3643755/3641916/3640957/3641244/36379…	MED20/UGA32/CAALFM_C602300CA/TAF4/ZCF25/CAALFM_CR03330WA/ZCF26/SFL1/ZCF27/LYS143/SRB8/HAP42/CAALFM_C403090WA/SPB1/POL5/ASK1/CAALFM_CR06960WA/BUD31/ZCF22/APC1/ARG81/NAP1/LYS144/NUP84/UGA33/MED5/EXM2/HHO1/MED18/ARG83/CAALFM_C402590CA/PES1/CTA7/CAALFM_C107260CA/SSU72/MED1/MTW1/SRB9/CAALFM_CR09490WA/SOH1/CAALFM_C600640CA/CAALFM_C405180CA/CAT8/RPA135/CAALFM_C104230WA/TAC1/SUC1/CAALFM_CR03930CA/GAL4/UM…	53	33	30515250/3639333/3645198/3635694/3635666/3635631/3641128/3637926/3635656/3645737/3637727/3639383/3640512/3645351/3648211/3642929/30515358/3644103/3637862/3637913/3644456/3637418/3643783/3635845/3641896/3646859/3647134/3647413/3640745/3641244/3637918/3638515/3638903	20	3645874/3645095/3642498/3634894/3635729/3648179/3639254/3634796/3634775/3639714/3641886/3644105/3637776/3645129/3637996/3644722/3643755/3641916/3640957/3639857
CC	GO:0000228	nuclear chromosome	3/237	21/970	0.919431	0.997405	3635656/3637913/3641896	ASK1/CAALFM_C402590CA/CAALFM_CR09490WA	3	3	3635656/3637913/3641896	0
CC	GO:0043227	membrane-bounded organelle	77/237	352/970	0.930803	0.997405	3642793/30515250/3639333/3636968/3645874/3645198/3635694/3636457/3636558/3645095/3635666/3642498/3635631/3636511/3634894/3641128/3635729/3637926/3648179/3639254/3636834/3635656/3645737/3634796/3637727/30515038/3637401/3639383/3634775/3635692/3641898/3643103/3639714/3640512/3645351/3635662/3641886/3648211/3642929/3644698/3636860/30515358/3644103/3641607/3637862/3637913/3644105/3637776/3644456/3643…	CAALFM_C406440CA/MED20/UGA32/TOM40/CAALFM_C602300CA/TAF4/ZCF25/TIP20/PXP2/CAALFM_CR03330WA/ZCF26/SFL1/ZCF27/CAALFM_C504580CA/LYS143/SRB8/HAP42/CAALFM_C403090WA/SPB1/POL5/CAALFM_C102960CA/ASK1/CAALFM_CR06960WA/BUD31/ZCF22/PET100/CAALFM_C203800CA/APC1/ARG81/CAALFM_C402240CA/PHO88/MAM33/NAP1/LYS144/NUP84/CLC1/UGA33/MED5/EXM2/POR1/SEC62/HHO1/MED18/CAALFM_C601370WA/ARG83/CAALFM_C402590CA/PES1/CTA7/CAA…	77	45	3642793/30515250/3639333/3645198/3635694/3636457/3636558/3635666/3635631/3636511/3641128/3637926/3636834/3635656/3645737/3637727/3637401/3639383/3635692/3640512/3645351/3635662/3648211/3642929/3644698/30515358/3644103/3637862/3637913/3644456/3643928/3637418/3643783/3635845/3641896/3646859/3647134/3647413/3640745/3637921/3641244/3637918/3638515/3638903/30515402	32	3636968/3645874/3645095/3642498/3634894/3635729/3648179/3639254/3634796/30515038/3634775/3641898/3643103/3639714/3641886/3636860/3641607/3644105/3637776/3645129/3642019/3640307/3638943/3645794/3637996/3644722/3643755/3636817/3641916/3640957/3646057/3639857
CC	GO:0016469	proton-transporting two-sector ATPase complex	2/237	16/970	0.931801	0.997405	3640111/30515402	VMA4/VMA13	2	2	3640111/30515402	0
CC	GO:0043231	intracellular membrane-bounded organelle	75/237	344/970	0.932787	0.997405	3642793/30515250/3639333/3636968/3645874/3645198/3635694/3636457/3636558/3645095/3635666/3642498/3635631/3634894/3641128/3635729/3637926/3648179/3639254/3636834/3635656/3645737/3634796/3637727/30515038/3637401/3639383/3634775/3635692/3641898/3643103/3639714/3640512/3645351/3635662/3641886/3648211/3642929/3644698/3636860/30515358/3644103/3641607/3637862/3637913/3644105/3637776/3644456/3643928/3645…	CAALFM_C406440CA/MED20/UGA32/TOM40/CAALFM_C602300CA/TAF4/ZCF25/TIP20/PXP2/CAALFM_CR03330WA/ZCF26/SFL1/ZCF27/LYS143/SRB8/HAP42/CAALFM_C403090WA/SPB1/POL5/CAALFM_C102960CA/ASK1/CAALFM_CR06960WA/BUD31/ZCF22/PET100/CAALFM_C203800CA/APC1/ARG81/CAALFM_C402240CA/PHO88/MAM33/NAP1/LYS144/NUP84/CLC1/UGA33/MED5/EXM2/POR1/SEC62/HHO1/MED18/CAALFM_C601370WA/ARG83/CAALFM_C402590CA/PES1/CTA7/CAALFM_C107260CA/CAA…	75	44	3642793/30515250/3639333/3645198/3635694/3636457/3636558/3635666/3635631/3641128/3637926/3636834/3635656/3645737/3637727/3637401/3639383/3635692/3640512/3645351/3635662/3648211/3642929/3644698/30515358/3644103/3637862/3637913/3644456/3643928/3637418/3643783/3635845/3641896/3646859/3647134/3647413/3640745/3637921/3641244/3637918/3638515/3638903/30515402	31	3636968/3645874/3645095/3642498/3634894/3635729/3648179/3639254/3634796/30515038/3634775/3641898/3643103/3639714/3641886/3636860/3641607/3644105/3637776/3645129/3642019/3640307/3638943/3637996/3644722/3643755/3636817/3641916/3640957/3646057/3639857
CC	GO:0044444	cytoplasmic part	43/237	208/970	0.936712	0.997405	3642793/3645373/3648085/3636968/30515262/3636457/3636558/3636511/3646845/3639724/3639723/3636834/3641383/30515038/3643513/3637401/3635692/3641898/3643103/3639497/3635662/3645870/3640548/30515335/3644698/3642806/3636860/3641607/3646039/3643928/3642019/3640307/3638943/3645794/3636817/30515301/3637954/3643347/3637921/30515338/3640303/3646057/30515402	CAALFM_C406440CA/CAALFM_C403560WA/CAALFM_C406130WA/TOM40/CAALFM_C403930CA/TIP20/PXP2/CAALFM_C504580CA/SEC15/MRPL6/CAALFM_CR00490WA/CAALFM_C102960CA/CAALFM_C703000CA/PET100/CAALFM_C207190CA/CAALFM_C203800CA/CAALFM_C402240CA/PHO88/MAM33/MRPL19/CLC1/SEC27/CAALFM_C300450CA/RPL32/POR1/SEC3/SEC62/CAALFM_C601370WA/MRPL8/CAALFM_C210200WA/CAALFM_C112280CA/ORM1/CAALFM_CR10760CA/VPS28/TOM20/CAALFM_C501540WA…	43	17	3642793/3645373/3648085/30515262/3636457/3636558/3636511/3646845/3636834/3637401/3635692/3635662/3644698/3642806/3643928/3637921/30515402	26	3636968/3639724/3639723/3641383/30515038/3643513/3641898/3643103/3639497/3645870/3640548/30515335/3636860/3641607/3646039/3642019/3640307/3638943/3645794/3636817/30515301/3637954/3643347/30515338/3640303/3646057
CC	GO:0005798	Golgi-associated vesicle	1/237	10/970	0.940192	0.997405	3635662	CLC1	1	1	3635662	0
CC	GO:0012506	vesicle membrane	1/237	10/970	0.940192	0.997405	3635662	CLC1	1	1	3635662	0
CC	GO:0030120	vesicle coat	1/237	10/970	0.940192	0.997405	3635662	CLC1	1	1	3635662	0
CC	GO:0030135	coated vesicle	1/237	10/970	0.940192	0.997405	3635662	CLC1	1	1	3635662	0
CC	GO:0030659	cytoplasmic vesicle membrane	1/237	10/970	0.940192	0.997405	3635662	CLC1	1	1	3635662	0
CC	GO:0030660	Golgi-associated vesicle membrane	1/237	10/970	0.940192	0.997405	3635662	CLC1	1	1	3635662	0
CC	GO:0030662	coated vesicle membrane	1/237	10/970	0.940192	0.997405	3635662	CLC1	1	1	3635662	0
CC	GO:1990904	ribonucleoprotein complex	19/237	103/970	0.95034	0.997405	30515262/3639724/3639723/3641383/3643513/3639497/3640548/3642929/30515335/3646039/3635757/30515301/3637954/3643347/30515338/3640303/3638502/3646057/3638903	CAALFM_C403930CA/MRPL6/CAALFM_CR00490WA/CAALFM_C703000CA/CAALFM_C207190CA/MRPL19/CAALFM_C300450CA/EXM2/RPL32/MRPL8/UTP21/CAALFM_C501540WA/YML6/RPL4B/RPL25/CAALFM_C603730CA/CAALFM_C306760WA/CAALFM_CR07320CA/CAALFM_C200200WA	19	3	30515262/3642929/3638903	16	3639724/3639723/3641383/3643513/3639497/3640548/30515335/3646039/3635757/30515301/3637954/3643347/30515338/3640303/3638502/3646057
CC	GO:0000794	condensed nuclear chromosome	1/237	11/970	0.954957	0.997405	3635656	ASK1	1	1	3635656	0
CC	GO:0098798	mitochondrial protein complex	2/237	18/970	0.957341	0.997405	3636817/3646057	TOM20/CAALFM_CR07320CA	2	0		2	3636817/3646057
CC	GO:0005840	ribosome	14/237	82/970	0.964414	0.997405	3639724/3639723/3641383/3643513/3639497/3640548/30515335/3646039/30515301/3637954/3643347/30515338/3640303/3646057	MRPL6/CAALFM_CR00490WA/CAALFM_C703000CA/CAALFM_C207190CA/MRPL19/CAALFM_C300450CA/RPL32/MRPL8/CAALFM_C501540WA/YML6/RPL4B/RPL25/CAALFM_C603730CA/CAALFM_CR07320CA	14	0		14	3639724/3639723/3641383/3643513/3639497/3640548/30515335/3646039/30515301/3637954/3643347/30515338/3640303/3646057
CC	GO:0043226	organelle	101/237	470/970	0.98408	0.997405	3642793/30515250/3639333/3636968/3645874/3645198/3635694/3636457/3636558/3645095/3635666/3642498/3635631/3636511/3639724/3634894/3639723/3638037/3641128/3635729/3637926/3648179/3639254/3636834/3641383/3635656/3645737/3634796/3637727/30515038/3643513/3637401/3639383/3634775/3635692/3640732/3641898/3643103/3644707/3639497/3639714/3644034/3640512/3645351/3635662/3641886/3640548/3645658/3648211/36429…	CAALFM_C406440CA/MED20/UGA32/TOM40/CAALFM_C602300CA/TAF4/ZCF25/TIP20/PXP2/CAALFM_CR03330WA/ZCF26/SFL1/ZCF27/CAALFM_C504580CA/MRPL6/LYS143/CAALFM_CR00490WA/DCC1/SRB8/HAP42/CAALFM_C403090WA/SPB1/POL5/CAALFM_C102960CA/CAALFM_C703000CA/ASK1/CAALFM_CR06960WA/BUD31/ZCF22/PET100/CAALFM_C207190CA/CAALFM_C203800CA/APC1/ARG81/CAALFM_C402240CA/CAALFM_C108150CA/PHO88/MAM33/HHT21/MRPL19/NAP1/TOP1/LYS144/NUP84…	101	52	3642793/30515250/3639333/3645198/3635694/3636457/3636558/3635666/3635631/3636511/3638037/3641128/3637926/3636834/3635656/3645737/3637727/3637401/3639383/3635692/3640732/3640512/3645351/3635662/3648211/3642929/3644698/30515358/3644103/3637862/3635665/3637913/3646043/3644456/3643928/3637418/3643783/3635845/3641896/3646859/3647134/3647413/3640745/3636415/3637921/3641815/3641244/3637918/3638515/36389…	49	3636968/3645874/3645095/3642498/3639724/3634894/3639723/3635729/3648179/3639254/3641383/3634796/30515038/3643513/3634775/3641898/3643103/3644707/3639497/3639714/3644034/3641886/3640548/3645658/30515335/3636860/3644120/3641607/3646039/3644105/3637776/3645129/3642019/3640307/3638943/3645794/3637996/3644722/3643755/3636817/30515301/3641916/3637954/3643347/3640957/30515338/3640303/3646057/3639857
CC	GO:0043229	intracellular organelle	101/237	470/970	0.98408	0.997405	3642793/30515250/3639333/3636968/3645874/3645198/3635694/3636457/3636558/3645095/3635666/3642498/3635631/3636511/3639724/3634894/3639723/3638037/3641128/3635729/3637926/3648179/3639254/3636834/3641383/3635656/3645737/3634796/3637727/30515038/3643513/3637401/3639383/3634775/3635692/3640732/3641898/3643103/3644707/3639497/3639714/3644034/3640512/3645351/3635662/3641886/3640548/3645658/3648211/36429…	CAALFM_C406440CA/MED20/UGA32/TOM40/CAALFM_C602300CA/TAF4/ZCF25/TIP20/PXP2/CAALFM_CR03330WA/ZCF26/SFL1/ZCF27/CAALFM_C504580CA/MRPL6/LYS143/CAALFM_CR00490WA/DCC1/SRB8/HAP42/CAALFM_C403090WA/SPB1/POL5/CAALFM_C102960CA/CAALFM_C703000CA/ASK1/CAALFM_CR06960WA/BUD31/ZCF22/PET100/CAALFM_C207190CA/CAALFM_C203800CA/APC1/ARG81/CAALFM_C402240CA/CAALFM_C108150CA/PHO88/MAM33/HHT21/MRPL19/NAP1/TOP1/LYS144/NUP84…	101	52	3642793/30515250/3639333/3645198/3635694/3636457/3636558/3635666/3635631/3636511/3638037/3641128/3637926/3636834/3635656/3645737/3637727/3637401/3639383/3635692/3640732/3640512/3645351/3635662/3648211/3642929/3644698/30515358/3644103/3637862/3635665/3637913/3646043/3644456/3643928/3637418/3643783/3635845/3641896/3646859/3647134/3647413/3640745/3636415/3637921/3641815/3641244/3637918/3638515/36389…	49	3636968/3645874/3645095/3642498/3639724/3634894/3639723/3635729/3648179/3639254/3641383/3634796/30515038/3643513/3634775/3641898/3643103/3644707/3639497/3639714/3644034/3641886/3640548/3645658/30515335/3636860/3644120/3641607/3646039/3644105/3637776/3645129/3642019/3640307/3638943/3645794/3637996/3644722/3643755/3636817/30515301/3641916/3637954/3643347/3640957/30515338/3640303/3646057/3639857
CC	GO:0044455	mitochondrial membrane part	1/237	16/970	0.989143	0.997405	3636817	TOM20	1	0		1	3636817
CC	GO:0005743	mitochondrial inner membrane	1/237	21/970	0.997405	0.997405	3636834	CAALFM_C102960CA	1	1	3636834	0
CC	GO:0019866	organelle inner membrane	1/237	21/970	0.997405	0.997405	3636834	CAALFM_C102960CA	1	1	3636834	0
MF	GO:0008233	peptidase activity	30/590	72/2491	0.000460583	0.0384776	3635769/3646669/3640999/3639889/30515395/3638884/3636589/3638311/3646074/3639658/3646979/3646718/3641106/3640510/3643490/3641906/3643111/3644435/3636957/3639558/3643299/3641012/3637815/3639317/3647903/3642501/3647044/3643337/3643660/3636487	CAALFM_C202020WA/GPI8/PIM1/PRC3/PRE6/CAALFM_C200700WA/AFG3/PRE9/CAALFM_C600340CA/CAALFM_CR00660WA/LAP4/PUP3/CAALFM_C404550CA/SCL1/PRE2/PRE8/PRE5/CAALFM_C110820CA/PRE10/CAALFM_C106390WA/CAALFM_C114450CA/LAP3/DAP2/UBP6/CAALFM_C600170CA/CAALFM_CR05980WA/PRC2/DOA4/PRE3/RIM13	30	8	3639889/3639658/3646979/3641106/3644435/3641012/3647044/3636487	22	3635769/3646669/3640999/30515395/3638884/3636589/3638311/3646074/3646718/3640510/3643490/3641906/3643111/3636957/3639558/3643299/3637815/3639317/3647903/3642501/3643337/3643660
MF	GO:0070011	peptidase activity, acting on L-amino acid peptides	29/590	69/2491	0.000481019	0.0384776	3635769/3640999/3639889/30515395/3638884/3636589/3638311/3646074/3639658/3646979/3646718/3641106/3640510/3643490/3641906/3643111/3644435/3636957/3639558/3643299/3641012/3637815/3639317/3647903/3642501/3647044/3643337/3643660/3636487	CAALFM_C202020WA/PIM1/PRC3/PRE6/CAALFM_C200700WA/AFG3/PRE9/CAALFM_C600340CA/CAALFM_CR00660WA/LAP4/PUP3/CAALFM_C404550CA/SCL1/PRE2/PRE8/PRE5/CAALFM_C110820CA/PRE10/CAALFM_C106390WA/CAALFM_C114450CA/LAP3/DAP2/UBP6/CAALFM_C600170CA/CAALFM_CR05980WA/PRC2/DOA4/PRE3/RIM13	29	8	3639889/3639658/3646979/3641106/3644435/3641012/3647044/3636487	21	3635769/3640999/30515395/3638884/3636589/3638311/3646074/3646718/3640510/3643490/3641906/3643111/3636957/3639558/3643299/3637815/3639317/3647903/3642501/3643337/3643660
MF	GO:0004175	endopeptidase activity	17/590	35/2491	0.00106622	0.0384776	3640999/30515395/3638884/3636589/3638311/3646074/3639658/3646718/3641106/3640510/3643490/3641906/3643111/3636957/3641012/3643660/3636487	PIM1/PRE6/CAALFM_C200700WA/AFG3/PRE9/CAALFM_C600340CA/CAALFM_CR00660WA/PUP3/CAALFM_C404550CA/SCL1/PRE2/PRE8/PRE5/PRE10/LAP3/PRE3/RIM13	17	4	3639658/3641106/3641012/3636487	13	3640999/30515395/3638884/3636589/3638311/3646074/3646718/3640510/3643490/3641906/3643111/3636957/3643660
MF	GO:0004298	threonine-type endopeptidase activity	9/590	14/2491	0.00138209	0.0384776	30515395/3638311/3646718/3640510/3643490/3641906/3643111/3636957/3643660	PRE6/PRE9/PUP3/SCL1/PRE2/PRE8/PRE5/PRE10/PRE3	9	0		9	30515395/3638311/3646718/3640510/3643490/3641906/3643111/3636957/3643660
MF	GO:0070003	threonine-type peptidase activity	9/590	14/2491	0.00138209	0.0384776	30515395/3638311/3646718/3640510/3643490/3641906/3643111/3636957/3643660	PRE6/PRE9/PUP3/SCL1/PRE2/PRE8/PRE5/PRE10/PRE3	9	0		9	30515395/3638311/3646718/3640510/3643490/3641906/3643111/3636957/3643660
MF	GO:0016491	oxidoreductase activity	79/590	249/2491	0.00139919	0.0384776	3638034/3640295/3647407/3635693/3647233/3640255/3640962/3644994/3636836/3641618/3648226/3636576/3635852/3644060/3647071/3639287/3636977/3641545/3646794/3641137/3647343/3636558/3639699/30515385/3636213/3643654/3643520/3646660/3642989/3635636/3642279/3647153/3641602/3634913/3647752/3638350/3638897/3638008/3639700/3644563/3647131/3636954/3639380/3637045/3641911/3638306/3646505/3636439/3644420/364682…	LEU2/CAALFM_C603600CA/ALD6/CAALFM_C402230CA/CAALFM_C503770CA/YMX6/DIT2/CAALFM_C400290CA/GOR1/OYE23/ALK8/CAALFM_C302070CA/FMO1/EBP1/COX15/CAALFM_C100410CA/AHP2/IFG3/CAALFM_C403350CA/CAALFM_C404720WA/YHB5/PXP2/CAALFM_CR00220WA/ERV1/CYB2/CAALFM_C305640WA/PST1/CAALFM_C107630WA/RNR1/MDH1-1/LYS9/FET3/CAALFM_C601420CA/ZWF1/KGD1/CCP1/CAALFM_C200880WA/FRP2/ALK2/GPD2/FET34/CAALFM_C702010CA/CAALFM_C100630WA…	79	43	3640295/3647407/3635693/3647233/3640962/3644994/3636836/3648226/3636576/3635852/3639287/3636977/3641545/3646794/3636558/3639699/3636213/3643654/3643520/3635636/3642279/3634913/3638350/3638897/3639700/3636954/3639380/3637045/3641911/3644420/3645214/3638300/3646398/3644414/3642994/3636885/3643025/3645786/3643781/3643946/3639495/3643909/3634830	36	3638034/3640255/3641618/3644060/3647071/3641137/3647343/30515385/3646660/3642989/3647153/3641602/3647752/3638008/3644563/3647131/3638306/3646505/3636439/3646827/3644010/3647390/3634893/3638983/3643452/3637439/3639205/3641400/3645732/3647353/3646037/3646024/3646509/3642334/3642979/3636507
MF	GO:0016787	hydrolase activity	111/590	383/2491	0.00546537	0.128827	3636797/3641389/3640564/3636408/3637930/3635769/3646669/3640999/3634888/3641566/3638481/3635593/3637925/3645956/3641159/30515143/3639889/30515395/3635862/3643785/3638884/3636589/3638311/3639360/3646526/3641143/3636404/3646074/3639658/3644789/3646979/3646718/3641106/3639256/3637426/3640510/3635718/3642962/3643806/3644014/3642288/3636123/3639238/3637887/3635232/3642808/3643490/3639564/3647389/36427…	SCW4/IFM1/DAL1/RNY11/CAALFM_C403050CA/CAALFM_C202020WA/GPI8/PIM1/LIP1/ROT2/CAALFM_C307450CA/CAALFM_C401830CA/RBT7/ILS1/FGR10/RHO2/PRC3/PRE6/FGR22/SUP35/CAALFM_C200700WA/AFG3/PRE9/TUF1/PPS1/PPG1/PRP22/CAALFM_C600340CA/CAALFM_CR00660WA/CAALFM_C104800CA/LAP4/PUP3/CAALFM_C404550CA/MDL2/CAALFM_C203910CA/SCL1/CAALFM_C400850CA/YDC1/INP51/CAALFM_C601040CA/HST6/CAALFM_C113060CA/CAALFM_C602880WA/CAALFM_C40…	111	55	3636797/3640564/3636408/3637930/3634888/3641566/3638481/3635593/3637925/3641159/3639889/3635862/3646526/3641143/3636404/3639658/3644789/3646979/3641106/3635718/3642962/3643806/3642288/3637887/3635232/3642808/3642798/3636578/3641774/3637905/3644435/3635790/3641012/3636837/3634797/3637913/3636584/3635187/3646981/3645626/3647044/3635691/3637724/3642817/3640111/3644578/3636451/3645746/3635650/3639690…	56	3641389/3635769/3646669/3640999/3645956/30515143/30515395/3643785/3638884/3636589/3638311/3639360/3646074/3646718/3639256/3637426/3640510/3644014/3636123/3639238/3643490/3639564/3647389/3640275/3643964/3641906/3645137/3643111/3635792/3636957/3639558/3643299/3637815/3645967/3643529/3639317/3647903/3640289/3639314/3645129/3642501/3643673/3640128/3640722/3646502/3639237/3643337/3646925/3640290/36462…
MF	GO:0020037	heme binding	10/590	20/2491	0.00911084	0.156894	3640295/3640962/3648226/3647343/3639699/3638350/3639700/3637045/3641400/3639495	CAALFM_C603600CA/DIT2/ALK8/YHB5/CAALFM_CR00220WA/CCP1/ALK2/ALK6/ERG5/CAT1	10	8	3640295/3640962/3648226/3639699/3638350/3639700/3637045/3639495	2	3647343/3641400
MF	GO:0046906	tetrapyrrole binding	10/590	20/2491	0.00911084	0.156894	3640295/3640962/3648226/3647343/3639699/3638350/3639700/3637045/3641400/3639495	CAALFM_C603600CA/DIT2/ALK8/YHB5/CAALFM_CR00220WA/CCP1/ALK2/ALK6/ERG5/CAT1	10	8	3640295/3640962/3648226/3639699/3638350/3639700/3637045/3639495	2	3647343/3641400
MF	GO:0016705	oxidoreductase activity, acting on paired donors, with incorporation or reduction of molecular oxygen	11/590	23/2491	0.00950871	0.156894	3640295/3640962/3648226/3635852/3639699/3639700/3637045/3637439/3641400/3643781/3646509	CAALFM_C603600CA/DIT2/ALK8/FMO1/CAALFM_CR00220WA/ALK2/ALK6/IFK2/ERG5/CAALFM_C209860CA/ERG1	11	8	3640295/3640962/3648226/3635852/3639699/3639700/3637045/3643781	3	3637439/3641400/3646509
MF	GO:0004812	aminoacyl-tRNA ligase activity	14/590	34/2491	0.0172081	0.236612	3636831/3645124/3645956/3640285/3640121/3640275/3647882/3645137/3638029/3636516/3636398/3640128/3638486/3640232	MST1/CAALFM_CR03110WA/ILS1/ALA1/FRS1/NAM2/THS1/CAALFM_CR03400WA/GUS1/MES1/MSM1/CDC60/KRS1/CAALFM_C101530CA	14	0		14	3636831/3645124/3645956/3640285/3640121/3640275/3647882/3645137/3638029/3636516/3636398/3640128/3638486/3640232
MF	GO:0016875	ligase activity, forming carbon-oxygen bonds	14/590	34/2491	0.0172081	0.236612	3636831/3645124/3645956/3640285/3640121/3640275/3647882/3645137/3638029/3636516/3636398/3640128/3638486/3640232	MST1/CAALFM_CR03110WA/ILS1/ALA1/FRS1/NAM2/THS1/CAALFM_CR03400WA/GUS1/MES1/MSM1/CDC60/KRS1/CAALFM_C101530CA	14	0		14	3636831/3645124/3645956/3640285/3640121/3640275/3647882/3645137/3638029/3636516/3636398/3640128/3638486/3640232
MF	GO:0048037	cofactor binding	46/590	148/2491	0.020749	0.263353	3640295/3647233/3647344/3640962/3644994/3636836/3641618/3637437/3648226/3647320/3635852/3644060/3640163/3647343/3639699/3641131/3637329/3635591/3641602/3634913/3638350/3648026/3639700/3644563/3640574/3639380/3637045/3641911/3645756/3645027/3641342/3646398/3645873/3642994/3638983/3639709/3636827/3637439/3643025/3641400/3646037/3643946/3639495/3646509/3643430/3634830	CAALFM_C603600CA/CAALFM_C503770CA/CAALFM_CR07820WA/DIT2/CAALFM_C400290CA/GOR1/OYE23/UGA11/ALK8/ARO10/FMO1/EBP1/CAALFM_CR01810CA/YHB5/CAALFM_CR00220WA/ARG8/UGA1/PDC12/CAALFM_C601420CA/ZWF1/CCP1/GRE2/ALK2/GPD2/CAALFM_C300640WA/CAALFM_C100630WA/ALK6/CAALFM_CR08920WA/HIS5/CAR2/CAALFM_C703200CA/FDH1/CAALFM_C602290CA/AMO1/ALO1/CAALFM_CR00130CA/CAALFM_C102740CA/IFK2/DLD1/ERG5/LPD1/CAALFM_C210070WA/CAT1/…	46	29	3640295/3647233/3647344/3640962/3644994/3636836/3637437/3648226/3647320/3635852/3640163/3639699/3641131/3635591/3634913/3638350/3639700/3639380/3637045/3641911/3645756/3646398/3642994/3636827/3643025/3643946/3639495/3643430/3634830	17	3641618/3644060/3647343/3637329/3641602/3648026/3644563/3640574/3645027/3641342/3645873/3638983/3639709/3637439/3641400/3646037/3646509
MF	GO:0004553	hydrolase activity, hydrolyzing O-glycosyl compounds	10/590	23/2491	0.0281392	0.33164	3636797/3641566/3637426/3637905/3636837/3636584/3646981/3635691/3635650/3636816	SCW4/ROT2/CAALFM_C203910CA/CRH11/XOG1/CAALFM_C301820WA/HEX1/BGL2/CAALFM_C401220CA/EXG2	10	8	3636797/3641566/3637905/3636837/3636584/3646981/3635691/3635650	2	3637426/3636816
MF	GO:0015399	primary active transmembrane transporter activity	9/590	21/2491	0.0403795	0.353487	3639256/3642288/3647389/3642798/3643964/3640111/3640290/3646284/30515402	MDL2/HST6/CDR11/VMA8/YOR1/VMA4/SNQ2/ATM1/VMA13	9	4	3642288/3642798/3640111/30515402	5	3639256/3647389/3643964/3640290/3646284
MF	GO:0015405	P-P-bond-hydrolysis-driven transmembrane transporter activity	9/590	21/2491	0.0403795	0.353487	3639256/3642288/3647389/3642798/3643964/3640111/3640290/3646284/30515402	MDL2/HST6/CDR11/VMA8/YOR1/VMA4/SNQ2/ATM1/VMA13	9	4	3642288/3642798/3640111/30515402	5	3639256/3647389/3643964/3640290/3646284
MF	GO:0042626	ATPase activity, coupled to transmembrane movement of substances	9/590	21/2491	0.0403795	0.353487	3639256/3642288/3647389/3642798/3643964/3640111/3640290/3646284/30515402	MDL2/HST6/CDR11/VMA8/YOR1/VMA4/SNQ2/ATM1/VMA13	9	4	3642288/3642798/3640111/30515402	5	3639256/3647389/3643964/3640290/3646284
MF	GO:0043492	ATPase activity, coupled to movement of substances	9/590	21/2491	0.0403795	0.353487	3639256/3642288/3647389/3642798/3643964/3640111/3640290/3646284/30515402	MDL2/HST6/CDR11/VMA8/YOR1/VMA4/SNQ2/ATM1/VMA13	9	4	3642288/3642798/3640111/30515402	5	3639256/3647389/3643964/3640290/3646284
MF	GO:0004519	endonuclease activity	8/590	18/2491	0.0420269	0.353487	3636408/3637925/3639238/3637913/3640722/3639237/3636451/3639690	RNY11/RBT7/CAALFM_C602880WA/CAALFM_C402590CA/MRPL3/RNH1/CAALFM_C504260WA/CAALFM_CR00630WA	8	5	3636408/3637925/3637913/3636451/3639690	3	3639238/3640722/3639237
MF	GO:0004521	endoribonuclease activity	7/590	15/2491	0.0428909	0.353487	3636408/3637925/3639238/3640722/3639237/3636451/3639690	RNY11/RBT7/CAALFM_C602880WA/MRPL3/RNH1/CAALFM_C504260WA/CAALFM_CR00630WA	7	4	3636408/3637925/3636451/3639690	3	3639238/3640722/3639237
MF	GO:0050662	coenzyme binding	34/590	110/2491	0.0466582	0.353487	3647233/3647344/3636836/3641618/3637437/3647320/3635852/3644060/3640163/3641131/3637329/3635591/3641602/3634913/3648026/3644563/3640574/3639380/3641911/3645756/3645027/3641342/3646398/3645873/3638983/3639709/3636827/3637439/3643025/3646037/3643946/3646509/3643430/3634830	CAALFM_C503770CA/CAALFM_CR07820WA/GOR1/OYE23/UGA11/ARO10/FMO1/EBP1/CAALFM_CR01810CA/ARG8/UGA1/PDC12/CAALFM_C601420CA/ZWF1/GRE2/GPD2/CAALFM_C300640WA/CAALFM_C100630WA/CAALFM_CR08920WA/HIS5/CAR2/CAALFM_C703200CA/FDH1/CAALFM_C602290CA/ALO1/CAALFM_CR00130CA/CAALFM_C102740CA/IFK2/DLD1/LPD1/CAALFM_C210070WA/ERG1/BIO32/ARG5%2C6	34	19	3647233/3647344/3636836/3637437/3647320/3635852/3640163/3641131/3635591/3634913/3639380/3641911/3645756/3646398/3636827/3643025/3643946/3643430/3634830	15	3641618/3644060/3637329/3641602/3648026/3644563/3640574/3645027/3641342/3645873/3638983/3639709/3637439/3646037/3646509
MF	GO:0022804	active transmembrane transporter activity	11/590	28/2491	0.0471315	0.353487	3639256/3642288/3647389/3642798/3643964/3638865/3647141/3640111/3640290/3646284/30515402	MDL2/HST6/CDR11/VMA8/YOR1/CAALFM_C200540WA/NHX1/VMA4/SNQ2/ATM1/VMA13	11	4	3642288/3642798/3640111/30515402	7	3639256/3647389/3643964/3638865/3647141/3640290/3646284
MF	GO:0140098	catalytic activity, acting on RNA	30/590	97/2491	0.0588853	0.416728	3636408/3636831/3645124/3637925/3645956/3640285/3636401/3640121/3647593/3647851/3647677/3639238/3640275/3647882/3645137/3635790/3638029/3636516/3636398/3640128/3640722/3637996/3639237/3643427/3639378/3638486/3636451/3639690/3640232/3638335	RNY11/MST1/CAALFM_CR03110WA/RBT7/ILS1/ALA1/CAALFM_C505350WA/FRS1/CAALFM_CR05550CA/CAALFM_C403830WA/RPA190/CAALFM_C602880WA/NAM2/THS1/CAALFM_CR03400WA/CAALFM_C201910WA/GUS1/MES1/MSM1/CDC60/MRPL3/RPA135/RNH1/RPC40/RPO41/KRS1/CAALFM_C504260WA/CAALFM_CR00630WA/CAALFM_C101530CA/CAALFM_C302880WA	30	7	3636408/3637925/3636401/3647851/3635790/3636451/3639690	23	3636831/3645124/3645956/3640285/3640121/3647593/3647677/3639238/3640275/3647882/3645137/3638029/3636516/3636398/3640128/3640722/3637996/3639237/3643427/3639378/3638486/3640232/3638335
MF	GO:0008238	exopeptidase activity	5/590	2491-10-01	0.0633204	0.416728	3639889/3646979/3644435/3643299/3647044	PRC3/LAP4/CAALFM_C110820CA/CAALFM_C114450CA/PRC2	5	4	3639889/3646979/3644435/3647044	1	3643299
MF	GO:0016893	endonuclease activity, active with either ribo- or deoxyribonucleic acids and producing 5'-phosphomonoesters	5/590	2491-10-01	0.0633204	0.416728	3639238/3637913/3640722/3639237/3639690	CAALFM_C602880WA/CAALFM_C402590CA/MRPL3/RNH1/CAALFM_CR00630WA	5	2	3637913/3639690	3	3639238/3640722/3639237
MF	GO:0016798	hydrolase activity, acting on glycosyl bonds	10/590	26/2491	0.0656663	0.416728	3636797/3641566/3637426/3637905/3636837/3636584/3646981/3635691/3635650/3636816	SCW4/ROT2/CAALFM_C203910CA/CRH11/XOG1/CAALFM_C301820WA/HEX1/BGL2/CAALFM_C401220CA/EXG2	10	8	3636797/3641566/3637905/3636837/3636584/3646981/3635691/3635650	2	3637426/3636816
MF	GO:0016614	oxidoreductase activity, acting on CH-OH group of donors	12/590	33/2491	0.0689405	0.421303	3638034/3647233/3636836/3635636/3634913/3644563/3646827/3646398/3634893/3638983/3643946/3642979	LEU2/CAALFM_C503770CA/GOR1/MDH1-1/ZWF1/GPD2/CAALFM_C112810WA/FDH1/IDH1/ALO1/CAALFM_C210070WA/IDH2	12	6	3647233/3636836/3635636/3634913/3646398/3643946	6	3638034/3644563/3646827/3634893/3638983/3642979
MF	GO:0052689	carboxylic ester hydrolase activity	9/590	24/2491	0.0912208	0.501153	3634888/3645956/3640275/3645137/3635792/3635790/3634797/3640128/3638335	LIP1/ILS1/NAM2/CAALFM_CR03400WA/CAALFM_C201920CA/CAALFM_C201910WA/LIP3/CDC60/CAALFM_C302880WA	9	3	3634888/3635790/3634797	6	3645956/3640275/3645137/3635792/3640128/3638335
MF	GO:0016616	oxidoreductase activity, acting on the CH-OH group of donors, NAD or NADP as acceptor	11/590	31/2491	0.093304	0.501153	3638034/3647233/3636836/3635636/3634913/3644563/3646827/3646398/3634893/3643946/3642979	LEU2/CAALFM_C503770CA/GOR1/MDH1-1/ZWF1/GPD2/CAALFM_C112810WA/FDH1/IDH1/CAALFM_C210070WA/IDH2	11	6	3647233/3636836/3635636/3634913/3646398/3643946	5	3638034/3644563/3646827/3634893/3642979
MF	GO:0005215	transporter activity	43/590	151/2491	0.0934304	0.501153	3642793/3642278/3645111/3642635/3646404/3640993/3635201/3638855/3639256/3639546/3636156/3637036/3638876/3642288/3641214/3647389/3642798/3643964/3640089/3639894/3638865/3642303/3636142/3643029/3644867/3642785/3647671/3647141/3635861/3635609/3641902/3647897/3645012/3647077/3640111/3640290/3646284/3639861/3645419/3642307/30515402/3641636/3636394	CAALFM_C406440CA/JEN1/HGT18/GIT4/HGT9/CAALFM_CR04280CA/HGT5/CAALFM_C200550WA/MDL2/HAK1/CAALFM_C112930CA/CAALFM_C701600WA/HGT7/HST6/JEN2/CDR11/VMA8/YOR1/PTR2/UGA4/CAALFM_C200540WA/YVC1/DUR32/CAALFM_C202790CA/CAALFM_CR06230WA/XUT1/GPT1/NHX1/ZRT2/CAALFM_C400990WA/FCY24/HET1/DUR4/CTR1/VMA4/SNQ2/ATM1/PHO87/HSP30/SIT1/VMA13/CAALFM_C601780CA/CAALFM_C504620CA	43	28	3642793/3642278/3645111/3642635/3646404/3640993/3635201/3638855/3639546/3636156/3642288/3641214/3642798/3640089/3639894/3642303/3636142/3643029/3642785/3647671/3635861/3635609/3641902/3645012/3640111/3639861/3645419/30515402	15	3639256/3637036/3638876/3647389/3643964/3638865/3644867/3647141/3647897/3647077/3640290/3646284/3642307/3641636/3636394
MF	GO:0016831	carboxy-lyase activity	5/590	2491-11-01	0.094156	0.501153	3636649/3640574/3640297/3641233/3644116	URA3/CAALFM_C300640WA/CAALFM_C603620CA/CAALFM_C210860CA/SPE2	5	2	3636649/3644116	3	3640574/3640297/3641233
MF	GO:0008234	cysteine-type peptidase activity	8/590	21/2491	0.100143	0.516361	3635769/3639558/3641012/3639317/3647903/3642501/3643337/3636487	CAALFM_C202020WA/CAALFM_C106390WA/LAP3/UBP6/CAALFM_C600170CA/CAALFM_CR05980WA/DOA4/RIM13	8	2	3641012/3636487	6	3635769/3639558/3639317/3647903/3642501/3643337
MF	GO:0140101	catalytic activity, acting on a tRNA	16/590	50/2491	0.111636	0.553089	3636831/3645124/3645956/3640285/3640121/3640275/3647882/3645137/3635790/3638029/3636516/3636398/3640128/3638486/3640232/3638335	MST1/CAALFM_CR03110WA/ILS1/ALA1/FRS1/NAM2/THS1/CAALFM_CR03400WA/CAALFM_C201910WA/GUS1/MES1/MSM1/CDC60/KRS1/CAALFM_C101530CA/CAALFM_C302880WA	16	1	3635790	15	3636831/3645124/3645956/3640285/3640121/3640275/3647882/3645137/3638029/3636516/3636398/3640128/3638486/3640232/3638335
MF	GO:0050660	flavin adenine dinucleotide binding	9/590	25/2491	0.11397	0.553089	3647344/3635852/3639380/3641911/3638983/3637439/3643025/3646037/3646509	CAALFM_CR07820WA/FMO1/CAALFM_C100630WA/CAALFM_CR08920WA/ALO1/IFK2/DLD1/LPD1/ERG1	9	5	3647344/3635852/3639380/3641911/3643025	4	3638983/3637439/3646037/3646509
MF	GO:0042623	ATPase activity, coupled	10/590	29/2491	0.12555	0.578546	3640999/3639256/3642288/3647389/3642798/3643964/3640111/3640290/3646284/30515402	PIM1/MDL2/HST6/CDR11/VMA8/YOR1/VMA4/SNQ2/ATM1/VMA13	10	4	3642288/3642798/3640111/30515402	6	3640999/3639256/3647389/3643964/3640290/3646284
MF	GO:0140096	catalytic activity, acting on a protein	56/590	206/2491	0.126228	0.578546	3647733/3635769/3646669/3640999/3641127/3635180/3634767/3637922/3639889/30515395/3638884/3636589/3638311/3637393/3646526/3646074/3639658/3646979/3646718/3641106/3640510/3640953/3643482/3641888/3643490/3641611/3641906/3643111/3644435/3636957/3642789/3639558/3643299/3641012/3637815/3641144/3639317/3647903/3644055/3636978/3645897/3645129/3642501/3643424/3647044/3642643/3644040/3639498/3643337/364123…	MEC1/CAALFM_C202020WA/GPI8/PIM1/CAALFM_C404460CA/CAALFM_C304420WA/RAM2/BUB1/PRC3/PRE6/CAALFM_C200700WA/AFG3/PRE9/HOG1/PPS1/CAALFM_C600340CA/CAALFM_CR00660WA/LAP4/PUP3/CAALFM_C404550CA/SCL1/HST7/TPK2/MPS1/PRE2/PTK2/PRE8/PRE5/CAALFM_C110820CA/PRE10/CEK1/CAALFM_C106390WA/CAALFM_C114450CA/LAP3/DAP2/SSK2/UBP6/CAALFM_C600170CA/CAALFM_C601130WA/CYP1/GCN2/SSU72/CAALFM_CR05980WA/CDC7/PRC2/SNF1/VPS15/NPR1/…	56	22	3647733/3641127/3635180/3634767/3637922/3639889/3646526/3639658/3646979/3641106/3643482/3644435/3642789/3641012/3641144/3636978/3645897/3647044/3644040/3636487/3645205/3642481	34	3635769/3646669/3640999/30515395/3638884/3636589/3638311/3637393/3646074/3646718/3640510/3640953/3641888/3643490/3641611/3641906/3643111/3636957/3639558/3643299/3637815/3639317/3647903/3644055/3645129/3642501/3643424/3642643/3639498/3643337/3641237/3643660/3646075/3641199
MF	GO:0016758	transferase activity, transferring hexosyl groups	13/590	41/2491	0.150866	0.642622	3638384/3639182/3641116/3638357/3635641/3639346/3640410/3639258/3645443/3643928/3640435/3637442/3639844	KRE5/BMT4/PMT6/BMT7/CAALFM_C402100CA/CAALFM_C100810WA/GSL2/BMT6/KTR2/CAALFM_C210200WA/GSY1/BMT8/GSL1	13	9	3639182/3641116/3638357/3635641/3639346/3640410/3643928/3637442/3639844	4	3638384/3639258/3645443/3640435
MF	GO:0019783	ubiquitin-like protein-specific protease activity	6/590	16/2491	0.155787	0.642622	3635769/3639558/3639317/3647903/3642501/3643337	CAALFM_C202020WA/CAALFM_C106390WA/UBP6/CAALFM_C600170CA/CAALFM_CR05980WA/DOA4	6	0		6	3635769/3639558/3639317/3647903/3642501/3643337
MF	GO:0036459	thiol-dependent ubiquitinyl hydrolase activity	6/590	16/2491	0.155787	0.642622	3635769/3639558/3639317/3647903/3642501/3643337	CAALFM_C202020WA/CAALFM_C106390WA/UBP6/CAALFM_C600170CA/CAALFM_CR05980WA/DOA4	6	0		6	3635769/3639558/3639317/3647903/3642501/3643337
MF	GO:0101005	ubiquitinyl hydrolase activity	6/590	16/2491	0.155787	0.642622	3635769/3639558/3639317/3647903/3642501/3643337	CAALFM_C202020WA/CAALFM_C106390WA/UBP6/CAALFM_C600170CA/CAALFM_CR05980WA/DOA4	6	0		6	3635769/3639558/3639317/3647903/3642501/3643337
MF	GO:0005506	iron ion binding	9/590	27/2491	0.167774	0.675188	3640295/3635693/3640962/3644994/3648226/3639699/3639700/3637045/3641400	CAALFM_C603600CA/CAALFM_C402230CA/DIT2/CAALFM_C400290CA/ALK8/CAALFM_CR00220WA/ALK2/ALK6/ERG5	9	8	3640295/3635693/3640962/3644994/3648226/3639699/3639700/3637045	1	3641400
MF	GO:0016874	ligase activity	18/590	61/2491	0.174995	0.680597	3636831/3645124/3645956/3640285/3640121/3640719/3640275/3647882/3645137/3638029/3636516/3647757/3636398/3640128/3645732/3638486/3640232/3634763	MST1/CAALFM_CR03110WA/ILS1/ALA1/FRS1/ADE5%2C7/NAM2/THS1/CAALFM_CR03400WA/GUS1/MES1/CAALFM_C300830CA/MSM1/CDC60/MIS11/KRS1/CAALFM_C101530CA/GUA1	18	0		18	3636831/3645124/3645956/3640285/3640121/3640719/3640275/3647882/3645137/3638029/3636516/3647757/3636398/3640128/3645732/3638486/3640232/3634763
MF	GO:0000988	transcription factor activity, protein binding	8/590	24/2491	0.18765	0.680597	30515250/3641128/3648211/3644103/3637418/3635845/3646859/3638515	MED20/SRB8/MED5/MED18/MED1/SRB9/SOH1/CAALFM_C307050WA	8	8	30515250/3641128/3648211/3644103/3637418/3635845/3646859/3638515	0
MF	GO:0000989	transcription factor activity, transcription factor binding	8/590	24/2491	0.18765	0.680597	30515250/3641128/3648211/3644103/3637418/3635845/3646859/3638515	MED20/SRB8/MED5/MED18/MED1/SRB9/SOH1/CAALFM_C307050WA	8	8	30515250/3641128/3648211/3644103/3637418/3635845/3646859/3638515	0
MF	GO:0003712	transcription cofactor activity	8/590	24/2491	0.18765	0.680597	30515250/3641128/3648211/3644103/3637418/3635845/3646859/3638515	MED20/SRB8/MED5/MED18/MED1/SRB9/SOH1/CAALFM_C307050WA	8	8	30515250/3641128/3648211/3644103/3637418/3635845/3646859/3638515	0
MF	GO:0008194	UDP-glycosyltransferase activity	4/590	2491-10-01	0.193872	0.680597	3638384/3640410/3640435/3639844	KRE5/GSL2/GSY1/GSL1	4	2	3640410/3639844	2	3638384/3640435
MF	GO:0016765	transferase activity, transferring alkyl or aryl (other than methyl) groups	4/590	2491-10-01	0.193872	0.680597	3634767/3644538/3643769/3636399	RAM2/SAM2/CAALFM_C502040WA/RER2	4	2	3634767/3636399	2	3644538/3643769
MF	GO:0016757	transferase activity, transferring glycosyl groups	19/590	66/2491	0.197992	0.680597	3638384/3639182/3641116/3638357/3644405/3634904/3635641/3642282/3639346/3640410/3639258/3645443/3638789/3643928/3640435/3637442/3636501/3636488/3639844	KRE5/BMT4/PMT6/BMT7/MNN2/MNN12/CAALFM_C402100CA/GLG2/CAALFM_C100810WA/GSL2/BMT6/KTR2/MNN24/CAALFM_C210200WA/GSY1/BMT8/HIS1/CAALFM_C505040WA/GSL1	19	14	3639182/3641116/3638357/3634904/3635641/3642282/3639346/3640410/3638789/3643928/3637442/3636501/3636488/3639844	5	3638384/3644405/3639258/3645443/3640435
MF	GO:0003924	GTPase activity	13/590	44/2491	0.224505	0.755588	3641389/30515143/3643785/3639360/3636123/3635232/3639564/3641774/3643673/3646502/3646925/3642998/3637755	IFM1/RHO2/SUP35/TUF1/CAALFM_C113060CA/RHB1/MEF2/TUB4/DNM1/TEF2/GSP1/EFT2/GCD11	13	2	3635232/3641774	11	3641389/30515143/3643785/3639360/3636123/3639564/3643673/3646502/3646925/3642998/3637755
MF	GO:0017111	nucleoside-triphosphatase activity	29/590	107/2491	0.228966	0.755588	3641389/3640999/30515143/3643785/3639360/3636404/3639256/3644014/3642288/3636123/3635232/3639564/3647389/3642798/3643964/3641774/3635187/3639314/3643673/3646502/3646925/3640111/3640290/3646284/3644578/3642998/3642917/3637755/30515402	IFM1/PIM1/RHO2/SUP35/TUF1/PRP22/MDL2/CAALFM_C601040CA/HST6/CAALFM_C113060CA/RHB1/MEF2/CDR11/VMA8/YOR1/TUB4/CAALFM_C304230WA/GCN20/DNM1/TEF2/GSP1/VMA4/SNQ2/ATM1/CAALFM_C102100WA/EFT2/CAALFM_C406800WA/GCD11/VMA13	29	10	3636404/3642288/3635232/3642798/3641774/3635187/3640111/3644578/3642917/30515402	19	3641389/3640999/30515143/3643785/3639360/3639256/3644014/3636123/3639564/3647389/3643964/3639314/3643673/3646502/3646925/3640290/3646284/3642998/3637755
MF	GO:0004540	ribonuclease activity	7/590	22/2491	0.250165	0.795975	3636408/3637925/3639238/3640722/3639237/3636451/3639690	RNY11/RBT7/CAALFM_C602880WA/MRPL3/RNH1/CAALFM_C504260WA/CAALFM_CR00630WA	7	4	3636408/3637925/3636451/3639690	3	3639238/3640722/3639237
MF	GO:0016810	hydrolase activity, acting on carbon-nitrogen (but not peptide) bonds	4/590	2491-11-01	0.250853	0.795975	3640564/3642962/3636578/3645967	DAL1/YDC1/CAALFM_C302060WA/DAC1	4	3	3640564/3642962/3636578	1	3645967
MF	GO:0022857	transmembrane transporter activity	38/590	145/2491	0.259638	0.808308	3642793/3642278/3645111/3642635/3646404/3635201/3638855/3639256/3639546/3636156/3638876/3642288/3641214/3647389/3642798/3643964/3640089/3639894/3638865/3642303/3636142/3643029/3644867/3642785/3647671/3647141/3635861/3635609/3641902/3645012/3647077/3640111/3640290/3646284/3645419/3642307/30515402/3641636	CAALFM_C406440CA/JEN1/HGT18/GIT4/HGT9/HGT5/CAALFM_C200550WA/MDL2/HAK1/CAALFM_C112930CA/HGT7/HST6/JEN2/CDR11/VMA8/YOR1/PTR2/UGA4/CAALFM_C200540WA/YVC1/DUR32/CAALFM_C202790CA/CAALFM_CR06230WA/XUT1/GPT1/NHX1/ZRT2/CAALFM_C400990WA/FCY24/DUR4/CTR1/VMA4/SNQ2/ATM1/HSP30/SIT1/VMA13/CAALFM_C601780CA	38	26	3642793/3642278/3645111/3642635/3646404/3635201/3638855/3639546/3636156/3642288/3641214/3642798/3640089/3639894/3642303/3636142/3643029/3642785/3647671/3635861/3635609/3641902/3645012/3640111/3645419/30515402	12	3639256/3638876/3647389/3643964/3638865/3644867/3647141/3647077/3640290/3646284/3642307/3641636
MF	GO:0016830	carbon-carbon lyase activity	5/590	15/2491	0.270506	0.81015	3636649/3640574/3640297/3641233/3644116	URA3/CAALFM_C300640WA/CAALFM_C603620CA/CAALFM_C210860CA/SPE2	5	2	3636649/3644116	3	3640574/3640297/3641233
MF	GO:0008144	drug binding	92/590	369/2491	0.291229	0.81015	3637437/3640999/3636831/3642794/3645124/3641127/3645956/3637922/3640285/3635640/3644416/3637323/3642502/3638884/3636589/3641131/3637393/3636404/3636208/3642989/3637329/3640121/3639256/3644014/3641598/3642939/3642288/3634792/3643877/3640953/3643482/3640574/3645728/3641888/3647389/3640275/3645756/3641611/3647882/3643964/3645027/3645137/3641015/3642789/3641144/3638029/3642981/3636516/3639709/3635187…	UGA11/PIM1/MST1/CAALFM_C406430CA/CAALFM_CR03110WA/CAALFM_C404460CA/ILS1/BUB1/ALA1/ERG8/CAALFM_C111080WA/PYC2/CAALFM_CR05970CA/CAALFM_C200700WA/AFG3/ARG8/HOG1/PRP22/SEC18/RNR1/UGA1/FRS1/MDL2/CAALFM_C601040CA/CAALFM_C601890CA/MSH2/HST6/MSS116/RPT6/HST7/TPK2/CAALFM_C300640WA/URA2/MPS1/CDR11/NAM2/HIS5/PTK2/THS1/YOR1/CAR2/CAALFM_CR03400WA/HXK2/CEK1/SSK2/GUS1/PR26/MES1/CAALFM_CR00130CA/CAALFM_C304230WA…	92	29	3637437/3642794/3641127/3637922/3635640/3637323/3641131/3636404/3642939/3642288/3643482/3645756/3642789/3641144/3635187/3636459/3645897/3644040/3635766/3637896/3642817/3644578/3636587/3645010/3643430/3642917/3645205/3642481/3642097	63	3640999/3636831/3645124/3645956/3640285/3644416/3642502/3638884/3636589/3637393/3636208/3642989/3637329/3640121/3639256/3644014/3641598/3634792/3643877/3640953/3640574/3645728/3641888/3647389/3640275/3641611/3647882/3643964/3645027/3645137/3641015/3638029/3642981/3636516/3639709/3647757/3636398/3639314/3639324/3643424/3647692/3640128/3645732/3645883/3642643/3639498/3640290/3638486/3646284/3634868…
MF	GO:0051287	NAD binding	7/590	23/2491	0.291578	0.81015	3647233/3636836/3644563/3646398/3636827/3643946/3634830	CAALFM_C503770CA/GOR1/GPD2/FDH1/CAALFM_C102740CA/CAALFM_C210070WA/ARG5%2C6	7	6	3647233/3636836/3646398/3636827/3643946/3634830	1	3644563
MF	GO:0019842	vitamin binding	10/590	35/2491	0.304999	0.81015	3637437/3647320/3641131/3637329/3635591/3640574/3645756/3645027/3639709/3643430	UGA11/ARO10/ARG8/UGA1/PDC12/CAALFM_C300640WA/HIS5/CAR2/CAALFM_CR00130CA/BIO32	10	6	3637437/3647320/3641131/3635591/3645756/3643430	4	3637329/3640574/3645027/3639709
MF	GO:0008237	metallopeptidase activity	4/590	2491-12-01	0.310688	0.81015	3638884/3636589/3646074/3641106	CAALFM_C200700WA/AFG3/CAALFM_C600340CA/CAALFM_C404550CA	4	1	3641106	3	3638884/3636589/3646074
MF	GO:0097367	carbohydrate derivative binding	106/590	429/2491	0.311721	0.81015	3641618/3641389/3644060/3640999/3636831/3642794/3645124/3641127/3645956/3637922/30515143/3640285/3635640/3644416/3643785/3637323/3642502/3638884/3636589/3637393/3639360/3636404/3636208/3642989/3640121/3639256/3641602/3644014/3641598/3642939/3642288/3634792/3643877/3636123/3640953/3643482/3646952/3645728/3640299/3641888/3635232/3639564/3647389/3640275/3641611/3647882/3643964/3645137/3641015/364134…	OYE23/IFM1/EBP1/PIM1/MST1/CAALFM_C406430CA/CAALFM_CR03110WA/CAALFM_C404460CA/ILS1/BUB1/RHO2/ALA1/ERG8/CAALFM_C111080WA/SUP35/PYC2/CAALFM_CR05970CA/CAALFM_C200700WA/AFG3/HOG1/TUF1/PRP22/SEC18/RNR1/FRS1/MDL2/CAALFM_C601420CA/CAALFM_C601040CA/CAALFM_C601890CA/MSH2/HST6/MSS116/RPT6/CAALFM_C113060CA/HST7/TPK2/CAALFM_C405400CA/URA2/NOG2/MPS1/RHB1/MEF2/CDR11/NAM2/PTK2/THS1/YOR1/CAALFM_CR03400WA/HXK2/CAA…	106	28	3642794/3641127/3637922/3635640/3637323/3636404/3642939/3642288/3643482/3646952/3635232/3642789/3641144/3635187/3636459/3645897/3644040/3635766/3637896/3642817/3644578/3636587/3645010/3642917/3645205/3642481/3644719/3642097	78	3641618/3641389/3644060/3640999/3636831/3645124/3645956/30515143/3640285/3644416/3643785/3642502/3638884/3636589/3637393/3639360/3636208/3642989/3640121/3639256/3641602/3644014/3641598/3634792/3643877/3636123/3640953/3645728/3640299/3641888/3639564/3647389/3640275/3641611/3647882/3643964/3645137/3641015/3641342/3638029/3645873/3642981/3636516/3647757/3636398/3639314/3639324/3643424/3645866/364769…
MF	GO:0030554	adenyl nucleotide binding	85/590	342/2491	0.313694	0.81015	3640999/3636831/3642794/3645124/3641127/3645956/3637922/3640285/3635640/3644416/3637323/3642502/3638884/3636589/3637393/3636404/3636208/3642989/3640121/3639256/3644014/3641598/3642939/3642288/3634792/3643877/3640953/3643482/3645728/3641888/3647389/3640275/3641611/3647882/3643964/3645137/3641015/3642789/3641144/3638029/3642981/3636516/3635187/3636459/3647757/3636398/3639314/3645897/3639324/3643424…	PIM1/MST1/CAALFM_C406430CA/CAALFM_CR03110WA/CAALFM_C404460CA/ILS1/BUB1/ALA1/ERG8/CAALFM_C111080WA/PYC2/CAALFM_CR05970CA/CAALFM_C200700WA/AFG3/HOG1/PRP22/SEC18/RNR1/FRS1/MDL2/CAALFM_C601040CA/CAALFM_C601890CA/MSH2/HST6/MSS116/RPT6/HST7/TPK2/URA2/MPS1/CDR11/NAM2/PTK2/THS1/YOR1/CAALFM_CR03400WA/HXK2/CEK1/SSK2/GUS1/PR26/MES1/CAALFM_C304230WA/CAALFM_C505130CA/CAALFM_C300830CA/MSM1/GCN20/GCN2/CCT8/CDC7…	85	25	3642794/3641127/3637922/3635640/3637323/3636404/3642939/3642288/3643482/3642789/3641144/3635187/3636459/3645897/3644040/3635766/3637896/3642817/3644578/3636587/3645010/3642917/3645205/3642481/3642097	60	3640999/3636831/3645124/3645956/3640285/3644416/3642502/3638884/3636589/3637393/3636208/3642989/3640121/3639256/3644014/3641598/3634792/3643877/3640953/3645728/3641888/3647389/3640275/3641611/3647882/3643964/3645137/3641015/3638029/3642981/3636516/3647757/3636398/3639314/3639324/3643424/3647692/3640128/3645732/3645883/3642643/3639498/3640290/3638486/3646284/3634868/3644572/3637735/3641237/3642461…
MF	GO:0016462	pyrophosphatase activity	29/590	112/2491	0.321732	0.81015	3641389/3640999/30515143/3643785/3639360/3636404/3639256/3644014/3642288/3636123/3635232/3639564/3647389/3642798/3643964/3641774/3635187/3639314/3643673/3646502/3646925/3640111/3640290/3646284/3644578/3642998/3642917/3637755/30515402	IFM1/PIM1/RHO2/SUP35/TUF1/PRP22/MDL2/CAALFM_C601040CA/HST6/CAALFM_C113060CA/RHB1/MEF2/CDR11/VMA8/YOR1/TUB4/CAALFM_C304230WA/GCN20/DNM1/TEF2/GSP1/VMA4/SNQ2/ATM1/CAALFM_C102100WA/EFT2/CAALFM_C406800WA/GCD11/VMA13	29	10	3636404/3642288/3635232/3642798/3641774/3635187/3640111/3644578/3642917/30515402	19	3641389/3640999/30515143/3643785/3639360/3639256/3644014/3636123/3639564/3647389/3643964/3639314/3643673/3646502/3646925/3640290/3646284/3642998/3637755
MF	GO:0008236	serine-type peptidase activity	5/590	16/2491	0.322651	0.81015	3640999/3639889/3639658/3637815/3647044	PIM1/PRC3/CAALFM_CR00660WA/DAP2/PRC2	5	3	3639889/3639658/3647044	2	3640999/3637815
MF	GO:0010181	FMN binding	5/590	16/2491	0.322651	0.81015	3641618/3644060/3641602/3641342/3645873	OYE23/EBP1/CAALFM_C601420CA/CAALFM_C703200CA/CAALFM_C602290CA	5	0		5	3641618/3644060/3641602/3641342/3645873
MF	GO:0016627	oxidoreductase activity, acting on the CH-CH group of donors	5/590	16/2491	0.322651	0.81015	3647071/3636558/3641911/3647390/3645786	COX15/PXP2/CAALFM_CR08920WA/HEM13/DFG10	5	3	3636558/3641911/3645786	2	3647071/3647390
MF	GO:0017171	serine hydrolase activity	5/590	16/2491	0.322651	0.81015	3640999/3639889/3639658/3637815/3647044	PIM1/PRC3/CAALFM_CR00660WA/DAP2/PRC2	5	3	3639889/3639658/3647044	2	3640999/3637815
MF	GO:0032553	ribonucleotide binding	105/590	426/2491	0.32406	0.81015	3641618/3641389/3644060/3640999/3636831/3642794/3645124/3641127/3645956/3637922/30515143/3640285/3635640/3644416/3643785/3637323/3642502/3638884/3636589/3637393/3639360/3636404/3636208/3642989/3640121/3639256/3641602/3644014/3641598/3642939/3642288/3634792/3643877/3636123/3640953/3643482/3645728/3640299/3641888/3635232/3639564/3647389/3640275/3641611/3647882/3643964/3645137/3641015/3641342/364278…	OYE23/IFM1/EBP1/PIM1/MST1/CAALFM_C406430CA/CAALFM_CR03110WA/CAALFM_C404460CA/ILS1/BUB1/RHO2/ALA1/ERG8/CAALFM_C111080WA/SUP35/PYC2/CAALFM_CR05970CA/CAALFM_C200700WA/AFG3/HOG1/TUF1/PRP22/SEC18/RNR1/FRS1/MDL2/CAALFM_C601420CA/CAALFM_C601040CA/CAALFM_C601890CA/MSH2/HST6/MSS116/RPT6/CAALFM_C113060CA/HST7/TPK2/URA2/NOG2/MPS1/RHB1/MEF2/CDR11/NAM2/PTK2/THS1/YOR1/CAALFM_CR03400WA/HXK2/CAALFM_C703200CA/CEK…	105	27	3642794/3641127/3637922/3635640/3637323/3636404/3642939/3642288/3643482/3635232/3642789/3641144/3635187/3636459/3645897/3644040/3635766/3637896/3642817/3644578/3636587/3645010/3642917/3645205/3642481/3644719/3642097	78	3641618/3641389/3644060/3640999/3636831/3645124/3645956/30515143/3640285/3644416/3643785/3642502/3638884/3636589/3637393/3639360/3636208/3642989/3640121/3639256/3641602/3644014/3641598/3634792/3643877/3636123/3640953/3645728/3640299/3641888/3639564/3647389/3640275/3641611/3647882/3643964/3645137/3641015/3641342/3638029/3645873/3642981/3636516/3647757/3636398/3639314/3639324/3643424/3645866/364769…
MF	GO:0005524	ATP binding	84/590	340/2491	0.339096	0.819014	3640999/3636831/3642794/3645124/3641127/3645956/3637922/3640285/3635640/3644416/3637323/3642502/3638884/3636589/3637393/3636404/3636208/3642989/3640121/3639256/3644014/3641598/3642939/3642288/3634792/3643877/3640953/3643482/3645728/3641888/3647389/3640275/3641611/3647882/3643964/3645137/3641015/3642789/3641144/3638029/3642981/3636516/3635187/3636459/3647757/3636398/3639314/3645897/3639324/3643424…	PIM1/MST1/CAALFM_C406430CA/CAALFM_CR03110WA/CAALFM_C404460CA/ILS1/BUB1/ALA1/ERG8/CAALFM_C111080WA/PYC2/CAALFM_CR05970CA/CAALFM_C200700WA/AFG3/HOG1/PRP22/SEC18/RNR1/FRS1/MDL2/CAALFM_C601040CA/CAALFM_C601890CA/MSH2/HST6/MSS116/RPT6/HST7/TPK2/URA2/MPS1/CDR11/NAM2/PTK2/THS1/YOR1/CAALFM_CR03400WA/HXK2/CEK1/SSK2/GUS1/PR26/MES1/CAALFM_C304230WA/CAALFM_C505130CA/CAALFM_C300830CA/MSM1/GCN20/GCN2/CCT8/CDC7…	84	25	3642794/3641127/3637922/3635640/3637323/3636404/3642939/3642288/3643482/3642789/3641144/3635187/3636459/3645897/3644040/3635766/3637896/3642817/3644578/3636587/3645010/3642917/3645205/3642481/3642097	59	3640999/3636831/3645124/3645956/3640285/3644416/3642502/3638884/3636589/3637393/3636208/3642989/3640121/3639256/3644014/3641598/3634792/3643877/3640953/3645728/3641888/3647389/3640275/3641611/3647882/3643964/3645137/3641015/3638029/3642981/3636516/3647757/3636398/3639314/3639324/3643424/3647692/3640128/3645732/3645883/3642643/3639498/3640290/3638486/3646284/3634868/3644572/3637735/3641237/3642461…
MF	GO:0032559	adenyl ribonucleotide binding	84/590	340/2491	0.339096	0.819014	3640999/3636831/3642794/3645124/3641127/3645956/3637922/3640285/3635640/3644416/3637323/3642502/3638884/3636589/3637393/3636404/3636208/3642989/3640121/3639256/3644014/3641598/3642939/3642288/3634792/3643877/3640953/3643482/3645728/3641888/3647389/3640275/3641611/3647882/3643964/3645137/3641015/3642789/3641144/3638029/3642981/3636516/3635187/3636459/3647757/3636398/3639314/3645897/3639324/3643424…	PIM1/MST1/CAALFM_C406430CA/CAALFM_CR03110WA/CAALFM_C404460CA/ILS1/BUB1/ALA1/ERG8/CAALFM_C111080WA/PYC2/CAALFM_CR05970CA/CAALFM_C200700WA/AFG3/HOG1/PRP22/SEC18/RNR1/FRS1/MDL2/CAALFM_C601040CA/CAALFM_C601890CA/MSH2/HST6/MSS116/RPT6/HST7/TPK2/URA2/MPS1/CDR11/NAM2/PTK2/THS1/YOR1/CAALFM_CR03400WA/HXK2/CEK1/SSK2/GUS1/PR26/MES1/CAALFM_C304230WA/CAALFM_C505130CA/CAALFM_C300830CA/MSM1/GCN20/GCN2/CCT8/CDC7…	84	25	3642794/3641127/3637922/3635640/3637323/3636404/3642939/3642288/3643482/3642789/3641144/3635187/3636459/3645897/3644040/3635766/3637896/3642817/3644578/3636587/3645010/3642917/3645205/3642481/3642097	59	3640999/3636831/3645124/3645956/3640285/3644416/3642502/3638884/3636589/3637393/3636208/3642989/3640121/3639256/3644014/3641598/3634792/3643877/3640953/3645728/3641888/3647389/3640275/3641611/3647882/3643964/3645137/3641015/3638029/3642981/3636516/3647757/3636398/3639314/3639324/3643424/3647692/3640128/3645732/3645883/3642643/3639498/3640290/3638486/3646284/3634868/3644572/3637735/3641237/3642461…
MF	GO:0016887	ATPase activity	11/590	41/2491	0.374231	0.819014	3640999/3639256/3642288/3647389/3642798/3643964/3639314/3640111/3640290/3646284/30515402	PIM1/MDL2/HST6/CDR11/VMA8/YOR1/GCN20/VMA4/SNQ2/ATM1/VMA13	11	4	3642288/3642798/3640111/30515402	7	3640999/3639256/3647389/3643964/3639314/3640290/3646284
MF	GO:0000287	magnesium ion binding	5/590	17/2491	0.375745	0.819014	3635591/3640121/3635594/3643438/3636501	PDC12/FRS1/CAALFM_C401820CA/CDC19/HIS1	5	3	3635591/3635594/3636501	2	3640121/3643438
MF	GO:0017076	purine nucleotide binding	101/590	414/2491	0.376029	0.819014	3641389/3640999/3636831/3642794/3645124/3641127/3645956/3637922/30515143/3640285/3635640/3644416/3643785/3637323/3642502/3638884/3636589/3637393/3639360/3636404/3636208/3642989/3640121/3639256/3644014/3641598/3642939/3642288/3634792/3643877/3636123/3640953/3643482/3645728/3640299/3641888/3635232/3639564/3647389/3640275/3641611/3647882/3643964/3645137/3641015/3642789/3641144/3638029/3642981/363651…	IFM1/PIM1/MST1/CAALFM_C406430CA/CAALFM_CR03110WA/CAALFM_C404460CA/ILS1/BUB1/RHO2/ALA1/ERG8/CAALFM_C111080WA/SUP35/PYC2/CAALFM_CR05970CA/CAALFM_C200700WA/AFG3/HOG1/TUF1/PRP22/SEC18/RNR1/FRS1/MDL2/CAALFM_C601040CA/CAALFM_C601890CA/MSH2/HST6/MSS116/RPT6/CAALFM_C113060CA/HST7/TPK2/URA2/NOG2/MPS1/RHB1/MEF2/CDR11/NAM2/PTK2/THS1/YOR1/CAALFM_CR03400WA/HXK2/CEK1/SSK2/GUS1/PR26/MES1/CAALFM_C304230WA/CAALFM…	101	27	3642794/3641127/3637922/3635640/3637323/3636404/3642939/3642288/3643482/3635232/3642789/3641144/3635187/3636459/3645897/3644040/3635766/3637896/3642817/3644578/3636587/3645010/3642917/3645205/3642481/3644719/3642097	74	3641389/3640999/3636831/3645124/3645956/30515143/3640285/3644416/3643785/3642502/3638884/3636589/3637393/3639360/3636208/3642989/3640121/3639256/3644014/3641598/3634792/3643877/3636123/3640953/3645728/3640299/3641888/3639564/3647389/3640275/3641611/3647882/3643964/3645137/3641015/3638029/3642981/3636516/3647757/3636398/3639314/3639324/3643424/3645866/3647692/3643673/3640128/3645732/3645883/364264…
MF	GO:0000030	mannosyltransferase activity	6/590	21/2491	0.377498	0.819014	3639182/3641116/3638357/3639258/3645443/3637442	BMT4/PMT6/BMT7/BMT6/KTR2/BMT8	6	4	3639182/3641116/3638357/3637442	2	3639258/3645443
MF	GO:0030170	pyridoxal phosphate binding	8/590	29/2491	0.377612	0.819014	3637437/3641131/3637329/3640574/3645756/3645027/3639709/3643430	UGA11/ARG8/UGA1/CAALFM_C300640WA/HIS5/CAR2/CAALFM_CR00130CA/BIO32	8	4	3637437/3641131/3645756/3643430	4	3637329/3640574/3645027/3639709
MF	GO:0070279	vitamin B6 binding	8/590	29/2491	0.377612	0.819014	3637437/3641131/3637329/3640574/3645756/3645027/3639709/3643430	UGA11/ARG8/UGA1/CAALFM_C300640WA/HIS5/CAR2/CAALFM_CR00130CA/BIO32	8	4	3637437/3641131/3645756/3643430	4	3637329/3640574/3645027/3639709
MF	GO:0032555	purine ribonucleotide binding	100/590	410/2491	0.378077	0.819014	3641389/3640999/3636831/3642794/3645124/3641127/3645956/3637922/30515143/3640285/3635640/3644416/3643785/3637323/3642502/3638884/3636589/3637393/3639360/3636404/3636208/3642989/3640121/3639256/3644014/3641598/3642939/3642288/3634792/3643877/3636123/3640953/3643482/3645728/3640299/3641888/3635232/3639564/3647389/3640275/3641611/3647882/3643964/3645137/3641015/3642789/3641144/3638029/3642981/363651…	IFM1/PIM1/MST1/CAALFM_C406430CA/CAALFM_CR03110WA/CAALFM_C404460CA/ILS1/BUB1/RHO2/ALA1/ERG8/CAALFM_C111080WA/SUP35/PYC2/CAALFM_CR05970CA/CAALFM_C200700WA/AFG3/HOG1/TUF1/PRP22/SEC18/RNR1/FRS1/MDL2/CAALFM_C601040CA/CAALFM_C601890CA/MSH2/HST6/MSS116/RPT6/CAALFM_C113060CA/HST7/TPK2/URA2/NOG2/MPS1/RHB1/MEF2/CDR11/NAM2/PTK2/THS1/YOR1/CAALFM_CR03400WA/HXK2/CEK1/SSK2/GUS1/PR26/MES1/CAALFM_C304230WA/CAALFM…	100	27	3642794/3641127/3637922/3635640/3637323/3636404/3642939/3642288/3643482/3635232/3642789/3641144/3635187/3636459/3645897/3644040/3635766/3637896/3642817/3644578/3636587/3645010/3642917/3645205/3642481/3644719/3642097	73	3641389/3640999/3636831/3645124/3645956/30515143/3640285/3644416/3643785/3642502/3638884/3636589/3637393/3639360/3636208/3642989/3640121/3639256/3644014/3641598/3634792/3643877/3636123/3640953/3645728/3640299/3641888/3639564/3647389/3640275/3641611/3647882/3643964/3645137/3641015/3638029/3642981/3636516/3647757/3636398/3639314/3639324/3643424/3645866/3647692/3643673/3640128/3645732/3645883/364264…
MF	GO:0035639	purine ribonucleoside triphosphate binding	100/590	410/2491	0.378077	0.819014	3641389/3640999/3636831/3642794/3645124/3641127/3645956/3637922/30515143/3640285/3635640/3644416/3643785/3637323/3642502/3638884/3636589/3637393/3639360/3636404/3636208/3642989/3640121/3639256/3644014/3641598/3642939/3642288/3634792/3643877/3636123/3640953/3643482/3645728/3640299/3641888/3635232/3639564/3647389/3640275/3641611/3647882/3643964/3645137/3641015/3642789/3641144/3638029/3642981/363651…	IFM1/PIM1/MST1/CAALFM_C406430CA/CAALFM_CR03110WA/CAALFM_C404460CA/ILS1/BUB1/RHO2/ALA1/ERG8/CAALFM_C111080WA/SUP35/PYC2/CAALFM_CR05970CA/CAALFM_C200700WA/AFG3/HOG1/TUF1/PRP22/SEC18/RNR1/FRS1/MDL2/CAALFM_C601040CA/CAALFM_C601890CA/MSH2/HST6/MSS116/RPT6/CAALFM_C113060CA/HST7/TPK2/URA2/NOG2/MPS1/RHB1/MEF2/CDR11/NAM2/PTK2/THS1/YOR1/CAALFM_CR03400WA/HXK2/CEK1/SSK2/GUS1/PR26/MES1/CAALFM_C304230WA/CAALFM…	100	27	3642794/3641127/3637922/3635640/3637323/3636404/3642939/3642288/3643482/3635232/3642789/3641144/3635187/3636459/3645897/3644040/3635766/3637896/3642817/3644578/3636587/3645010/3642917/3645205/3642481/3644719/3642097	73	3641389/3640999/3636831/3645124/3645956/30515143/3640285/3644416/3643785/3642502/3638884/3636589/3637393/3639360/3636208/3642989/3640121/3639256/3644014/3641598/3634792/3643877/3636123/3640953/3645728/3640299/3641888/3639564/3647389/3640275/3641611/3647882/3643964/3645137/3641015/3638029/3642981/3636516/3647757/3636398/3639314/3639324/3643424/3645866/3647692/3643673/3640128/3645732/3645883/364264…
MF	GO:0016818	hydrolase activity, acting on acid anhydrides, in phosphorus-containing anhydrides	29/590	115/2491	0.382206	0.819014	3641389/3640999/30515143/3643785/3639360/3636404/3639256/3644014/3642288/3636123/3635232/3639564/3647389/3642798/3643964/3641774/3635187/3639314/3643673/3646502/3646925/3640111/3640290/3646284/3644578/3642998/3642917/3637755/30515402	IFM1/PIM1/RHO2/SUP35/TUF1/PRP22/MDL2/CAALFM_C601040CA/HST6/CAALFM_C113060CA/RHB1/MEF2/CDR11/VMA8/YOR1/TUB4/CAALFM_C304230WA/GCN20/DNM1/TEF2/GSP1/VMA4/SNQ2/ATM1/CAALFM_C102100WA/EFT2/CAALFM_C406800WA/GCD11/VMA13	29	10	3636404/3642288/3635232/3642798/3641774/3635187/3640111/3644578/3642917/30515402	19	3641389/3640999/30515143/3643785/3639360/3639256/3644014/3636123/3639564/3647389/3643964/3639314/3643673/3646502/3646925/3640290/3646284/3642998/3637755
MF	GO:0046983	protein dimerization activity	12/590	46/2491	0.405244	0.853885	3644707/3645658/3634929/3637833/3644705/3647327/3641817/3635629/3643427/3644423/3642252/3640133	HHT21/HTA1/RTG1/HFL2/HHF1/HHF22/PHO4/HAP3/RPC40/RTG3/TAF60/MGE1	12	6	3634929/3637833/3641817/3635629/3644423/3642252	6	3644707/3645658/3644705/3647327/3643427/3640133
MF	GO:0016817	hydrolase activity, acting on acid anhydrides	29/590	117/2491	0.423613	0.853885	3641389/3640999/30515143/3643785/3639360/3636404/3639256/3644014/3642288/3636123/3635232/3639564/3647389/3642798/3643964/3641774/3635187/3639314/3643673/3646502/3646925/3640111/3640290/3646284/3644578/3642998/3642917/3637755/30515402	IFM1/PIM1/RHO2/SUP35/TUF1/PRP22/MDL2/CAALFM_C601040CA/HST6/CAALFM_C113060CA/RHB1/MEF2/CDR11/VMA8/YOR1/TUB4/CAALFM_C304230WA/GCN20/DNM1/TEF2/GSP1/VMA4/SNQ2/ATM1/CAALFM_C102100WA/EFT2/CAALFM_C406800WA/GCD11/VMA13	29	10	3636404/3642288/3635232/3642798/3641774/3635187/3640111/3644578/3642917/30515402	19	3641389/3640999/30515143/3643785/3639360/3639256/3644014/3636123/3639564/3647389/3643964/3639314/3643673/3646502/3646925/3640290/3646284/3642998/3637755
MF	GO:0003899	DNA-directed 5'-3' RNA polymerase activity	6/590	22/2491	0.425248	0.853885	3636401/3647593/3647677/3637996/3643427/3639378	CAALFM_C505350WA/CAALFM_CR05550CA/RPA190/RPA135/RPC40/RPO41	6	1	3636401	5	3647593/3647677/3637996/3643427/3639378
MF	GO:0034062	5'-3' RNA polymerase activity	6/590	22/2491	0.425248	0.853885	3636401/3647593/3647677/3637996/3643427/3639378	CAALFM_C505350WA/CAALFM_CR05550CA/RPA190/RPA135/RPC40/RPO41	6	1	3636401	5	3647593/3647677/3637996/3643427/3639378
MF	GO:0097747	RNA polymerase activity	6/590	22/2491	0.425248	0.853885	3636401/3647593/3647677/3637996/3643427/3639378	CAALFM_C505350WA/CAALFM_CR05550CA/RPA190/RPA135/RPC40/RPO41	6	1	3636401	5	3647593/3647677/3637996/3643427/3639378
MF	GO:0005507	copper ion binding	3/590	2491-10-01	0.434705	0.853885	3647153/3647131/3642994	FET3/FET34/AMO1	3	1	3642994	2	3647153/3647131
MF	GO:0016684	oxidoreductase activity, acting on peroxide as acceptor	3/590	2491-10-01	0.434705	0.853885	3638350/3644010/3639495	CCP1/CAALFM_C600850WA/CAT1	3	2	3638350/3639495	1	3644010
MF	GO:0003723	RNA binding	24/590	98/2491	0.464359	0.892494	3636408/30515262/3645124/3637925/3640267/3641734/3639724/3646358/3640121/3647851/3635700/3635203/3641648/3642929/3636205/3645108/3645881/3642927/3640141/3643461/3636451/3647682/3642646/3642818	RNY11/CAALFM_C403930CA/CAALFM_CR03110WA/RBT7/PBP2/CAM1/MRPL6/CAM1-1/FRS1/CAALFM_C403830WA/CAALFM_C401280CA/CAALFM_C305290CA/ANB1/EXM2/MPT5/ARC1/CAALFM_C602350CA/CAALFM_C406950WA/CAALFM_CR02100CA/CAALFM_C205160CA/CAALFM_C504260WA/CAALFM_C110620WA/CAALFM_C501300CA/CAALFM_C406170CA	24	11	3636408/30515262/3637925/3647851/3635700/3635203/3642929/3642927/3636451/3642646/3642818	13	3645124/3640267/3641734/3639724/3646358/3640121/3641648/3636205/3645108/3645881/3640141/3643461/3647682
MF	GO:0046982	protein heterodimerization activity	7/590	27/2491	0.465179	0.892494	3644707/3645658/3637833/3644705/3647327/3635629/3642252	HHT21/HTA1/HFL2/HHF1/HHF22/HAP3/TAF60	7	3	3637833/3635629/3642252	4	3644707/3645658/3644705/3647327
MF	GO:0016209	antioxidant activity	4/590	15/2491	0.490833	0.913211	3638350/3644010/3639495/3636507	CCP1/CAALFM_C600850WA/CAT1/CAALFM_C504530WA	4	2	3638350/3639495	2	3644010/3636507
MF	GO:0003779	actin binding	3/590	2491-11-01	0.50365	0.913211	3647093/3637875/3647133	WAL1/ABP1/CAALFM_C600660CA	3	2	3637875/3647133	1	3647093
MF	GO:0005085	guanyl-nucleotide exchange factor activity	3/590	2491-11-01	0.50365	0.913211	3637434/3643737/3635220	ROM2/CDC24/SEC7	3	1	3635220	2	3637434/3643737
MF	GO:0050661	NADP binding	3/590	2491-11-01	0.50365	0.913211	3635852/3634913/3637439	FMO1/ZWF1/IFK2	3	2	3635852/3634913	1	3637439
MF	GO:0051082	unfolded protein binding	3/590	2491-11-01	0.50365	0.913211	3641554/3644841/3641623	CAALFM_C500350CA/SIS1/CAALFM_C601460CA	3	1	3644841	2	3641554/3641623
MF	GO:0004518	nuclease activity	9/590	37/2491	0.527482	0.946027	3636408/3637925/3639238/3637887/3637913/3640722/3639237/3636451/3639690	RNY11/RBT7/CAALFM_C602880WA/CAALFM_C403290WA/CAALFM_C402590CA/MRPL3/RNH1/CAALFM_C504260WA/CAALFM_CR00630WA	9	6	3636408/3637925/3637887/3637913/3636451/3639690	3	3639238/3640722/3639237
MF	GO:0004386	helicase activity	4/590	16/2491	0.546893	0.970294	3636404/3644014/3635187/3642917	PRP22/CAALFM_C601040CA/CAALFM_C304230WA/CAALFM_C406800WA	4	3	3636404/3635187/3642917	1	3644014
MF	GO:0016788	hydrolase activity, acting on ester bonds	24/590	102/2491	0.554771	0.973801	3636408/3634888/3638481/3637925/3645956/3635862/3646526/3643806/3639238/3637887/3640275/3645137/3635792/3635790/3634797/3637913/3645626/3645129/3640128/3640722/3639237/3636451/3639690/3638335	RNY11/LIP1/CAALFM_C307450CA/RBT7/ILS1/FGR22/PPS1/INP51/CAALFM_C602880WA/CAALFM_C403290WA/NAM2/CAALFM_CR03400WA/CAALFM_C201920CA/CAALFM_C201910WA/LIP3/CAALFM_C402590CA/CAALFM_C303860WA/SSU72/CDC60/MRPL3/RNH1/CAALFM_C504260WA/CAALFM_CR00630WA/CAALFM_C302880WA	24	14	3636408/3634888/3638481/3637925/3635862/3646526/3643806/3637887/3635790/3634797/3637913/3645626/3636451/3639690	10	3645956/3639238/3640275/3645137/3635792/3645129/3640128/3640722/3639237/3638335
MF	GO:0005509	calcium ion binding	3/590	2491-12-01	0.56797	0.976199	3646520/3637426/3641184	CMD1/CAALFM_C203910CA/AXL2	3	2	3646520/3641184	1	3637426
MF	GO:0016866	intramolecular transferase activity	3/590	2491-12-01	0.56797	0.976199	3645881/3642927/3647682	CAALFM_C602350CA/CAALFM_C406950WA/CAALFM_C110620WA	3	1	3642927	2	3645881/3647682
MF	GO:0060589	nucleoside-triphosphatase regulator activity	4/590	17/2491	0.599554	0.981172	3646953/3638933/3640133/3643298	TSC2/AHA1/MGE1/GDI1	4	2	3646953/3638933	2	3640133/3643298
MF	GO:0016740	transferase activity	86/590	370/2491	0.608489	0.981172	3638384/3637437/3639182/3647733/3641116/3641127/3638357/3635180/3634767/3637922/3644416/3641131/3637393/3644405/3636401/3643486/3648179/3644538/3637329/3635624/3647593/3645575/3647851/3647677/3643769/3635594/3640953/3643482/3634904/3635641/3640084/3645728/3641888/3636655/3641611/3642282/3639346/3647454/3645027/3646036/3641015/3642506/3637986/3640410/3639258/3642789/3643438/3645443/3641144/3638789…	KRE5/UGA11/BMT4/MEC1/PMT6/CAALFM_C404460CA/BMT7/CAALFM_C304420WA/RAM2/BUB1/CAALFM_C111080WA/ARG8/HOG1/MNN2/CAALFM_C505350WA/CAALFM_C207240CA/SPB1/SAM2/UGA1/NMT1/CAALFM_CR05550CA/GWT1/CAALFM_C403830WA/RPA190/CAALFM_C502040WA/CAALFM_C401820CA/HST7/TPK2/MNN12/CAALFM_C402100CA/MET6/URA2/MPS1/ERG6/PTK2/GLG2/CAALFM_C100810WA/SRB1/CAR2/KGD2/HXK2/RSM22/CAALFM_C700490CA/GSL2/BMT6/CEK1/CDC19/KTR2/SSK2/MNN2…	86	42	3637437/3639182/3647733/3641116/3641127/3638357/3635180/3634767/3637922/3641131/3636401/3643486/3635624/3645575/3647851/3635594/3643482/3634904/3635641/3642282/3639346/3640410/3642789/3641144/3638789/3636459/3641808/3639356/3643928/3645897/3644040/3637442/3638333/3636501/3635766/3636488/3635685/3639844/3643430/3636399/3645205/3642481	44	3638384/3644416/3637393/3644405/3648179/3644538/3637329/3647593/3647677/3643769/3640953/3640084/3645728/3641888/3636655/3641611/3647454/3645027/3646036/3641015/3642506/3637986/3639258/3643438/3645443/3640977/3644055/3644533/3640435/3643424/3637996/3642643/3644024/3643427/3639498/3643176/3639378/3639234/3644572/3641881/3641237/3638363/3646075/3641199
MF	GO:0001883	purine nucleoside binding	16/590	70/2491	0.612489	0.981172	3641389/30515143/3643785/3639360/3636123/3640299/3635232/3639564/3645866/3643673/3646502/3646925/3642998/3645982/3637755/3644719	IFM1/RHO2/SUP35/TUF1/CAALFM_C113060CA/NOG2/RHB1/MEF2/CAALFM_C602230WA/DNM1/TEF2/GSP1/EFT2/CAALFM_C604450WA/GCD11/CDC3	16	2	3635232/3644719	14	3641389/30515143/3643785/3639360/3636123/3640299/3639564/3645866/3643673/3646502/3646925/3642998/3645982/3637755
MF	GO:0005525	GTP binding	16/590	70/2491	0.612489	0.981172	3641389/30515143/3643785/3639360/3636123/3640299/3635232/3639564/3645866/3643673/3646502/3646925/3642998/3645982/3637755/3644719	IFM1/RHO2/SUP35/TUF1/CAALFM_C113060CA/NOG2/RHB1/MEF2/CAALFM_C602230WA/DNM1/TEF2/GSP1/EFT2/CAALFM_C604450WA/GCD11/CDC3	16	2	3635232/3644719	14	3641389/30515143/3643785/3639360/3636123/3640299/3639564/3645866/3643673/3646502/3646925/3642998/3645982/3637755
MF	GO:0032549	ribonucleoside binding	16/590	70/2491	0.612489	0.981172	3641389/30515143/3643785/3639360/3636123/3640299/3635232/3639564/3645866/3643673/3646502/3646925/3642998/3645982/3637755/3644719	IFM1/RHO2/SUP35/TUF1/CAALFM_C113060CA/NOG2/RHB1/MEF2/CAALFM_C602230WA/DNM1/TEF2/GSP1/EFT2/CAALFM_C604450WA/GCD11/CDC3	16	2	3635232/3644719	14	3641389/30515143/3643785/3639360/3636123/3640299/3639564/3645866/3643673/3646502/3646925/3642998/3645982/3637755
MF	GO:0032550	purine ribonucleoside binding	16/590	70/2491	0.612489	0.981172	3641389/30515143/3643785/3639360/3636123/3640299/3635232/3639564/3645866/3643673/3646502/3646925/3642998/3645982/3637755/3644719	IFM1/RHO2/SUP35/TUF1/CAALFM_C113060CA/NOG2/RHB1/MEF2/CAALFM_C602230WA/DNM1/TEF2/GSP1/EFT2/CAALFM_C604450WA/GCD11/CDC3	16	2	3635232/3644719	14	3641389/30515143/3643785/3639360/3636123/3640299/3639564/3645866/3643673/3646502/3646925/3642998/3645982/3637755
MF	GO:0032561	guanyl ribonucleotide binding	16/590	70/2491	0.612489	0.981172	3641389/30515143/3643785/3639360/3636123/3640299/3635232/3639564/3645866/3643673/3646502/3646925/3642998/3645982/3637755/3644719	IFM1/RHO2/SUP35/TUF1/CAALFM_C113060CA/NOG2/RHB1/MEF2/CAALFM_C602230WA/DNM1/TEF2/GSP1/EFT2/CAALFM_C604450WA/GCD11/CDC3	16	2	3635232/3644719	14	3641389/30515143/3643785/3639360/3636123/3640299/3639564/3645866/3643673/3646502/3646925/3642998/3645982/3637755
MF	GO:0004806	triglyceride lipase activity	3/590	13/2491	0.626878	0.981447	3634888/3635792/3634797	LIP1/CAALFM_C201920CA/LIP3	3	2	3634888/3634797	1	3635792
MF	GO:0016879	ligase activity, forming carbon-nitrogen bonds	3/590	13/2491	0.626878	0.981447	3640719/3645732/3634763	ADE5%2C7/MIS11/GUA1	3	0		3	3640719/3645732/3634763
MF	GO:0098772	molecular function regulator	9/590	40/2491	0.631606	0.981447	3646953/3636473/3637434/3643737/3635220/3638933/3636917/3640133/3643298	TSC2/CAALFM_C505260WA/ROM2/CDC24/SEC7/AHA1/RPN3/MGE1/GDI1	9	4	3646953/3636473/3635220/3638933	5	3637434/3643737/3636917/3640133/3643298
MF	GO:0001882	nucleoside binding	16/590	71/2491	0.637554	0.981447	3641389/30515143/3643785/3639360/3636123/3640299/3635232/3639564/3645866/3643673/3646502/3646925/3642998/3645982/3637755/3644719	IFM1/RHO2/SUP35/TUF1/CAALFM_C113060CA/NOG2/RHB1/MEF2/CAALFM_C602230WA/DNM1/TEF2/GSP1/EFT2/CAALFM_C604450WA/GCD11/CDC3	16	2	3635232/3644719	14	3641389/30515143/3643785/3639360/3636123/3640299/3639564/3645866/3643673/3646502/3646925/3642998/3645982/3637755
MF	GO:0019001	guanyl nucleotide binding	16/590	72/2491	0.661796	0.981447	3641389/30515143/3643785/3639360/3636123/3640299/3635232/3639564/3645866/3643673/3646502/3646925/3642998/3645982/3637755/3644719	IFM1/RHO2/SUP35/TUF1/CAALFM_C113060CA/NOG2/RHB1/MEF2/CAALFM_C602230WA/DNM1/TEF2/GSP1/EFT2/CAALFM_C604450WA/GCD11/CDC3	16	2	3635232/3644719	14	3641389/30515143/3643785/3639360/3636123/3640299/3639564/3645866/3643673/3646502/3646925/3642998/3645982/3637755
MF	GO:0016301	kinase activity	28/590	125/2491	0.670328	0.981447	3647733/3641127/3637922/3644416/3637393/3640953/3643482/3641888/3641611/3642789/3641144/3644533/3636459/3645897/3643424/3642643/3644040/3638333/3635766/3639498/3643176/3635685/3644572/3641237/3645205/3642481/3646075/3641199	MEC1/CAALFM_C404460CA/BUB1/CAALFM_C111080WA/HOG1/HST7/TPK2/MPS1/PTK2/CEK1/SSK2/ADK1/CAALFM_C505130CA/GCN2/CDC7/SNF1/VPS15/THI6/FAB1/NPR1/CAALFM_CR03740CA/CAALFM_C401090CA/CAALFM_C102320CA/AKL1/CAALFM_C207530CA/CAALFM_C105370CA/PKH3/KIN3	28	14	3647733/3641127/3637922/3643482/3642789/3641144/3636459/3645897/3644040/3638333/3635766/3635685/3645205/3642481	14	3644416/3637393/3640953/3641888/3641611/3644533/3643424/3642643/3639498/3643176/3644572/3641237/3646075/3641199
MF	GO:0016773	phosphotransferase activity, alcohol group as acceptor	28/590	125/2491	0.670328	0.981447	3647733/3641127/3637922/3644416/3637393/3640953/3643482/3641888/3641611/3641015/3642789/3643438/3641144/3636459/3645897/3643424/3642643/3644040/3638333/3635766/3639498/3643176/3644572/3641237/3645205/3642481/3646075/3641199	MEC1/CAALFM_C404460CA/BUB1/CAALFM_C111080WA/HOG1/HST7/TPK2/MPS1/PTK2/HXK2/CEK1/CDC19/SSK2/CAALFM_C505130CA/GCN2/CDC7/SNF1/VPS15/THI6/FAB1/NPR1/CAALFM_CR03740CA/CAALFM_C102320CA/AKL1/CAALFM_C207530CA/CAALFM_C105370CA/PKH3/KIN3	28	13	3647733/3641127/3637922/3643482/3642789/3641144/3636459/3645897/3644040/3638333/3635766/3645205/3642481	15	3644416/3637393/3640953/3641888/3641611/3641015/3643438/3643424/3642643/3639498/3643176/3644572/3641237/3646075/3641199
MF	GO:0016829	lyase activity	8/590	37/2491	0.679157	0.981447	3636649/3642582/3646847/3641407/3640574/3640297/3641233/3644116	URA3/CAALFM_CR02780WA/CAALFM_C404270WA/CYR1/CAALFM_C300640WA/CAALFM_C603620CA/CAALFM_C210860CA/SPE2	8	5	3636649/3642582/3646847/3641407/3644116	3	3640574/3640297/3641233
MF	GO:0005543	phospholipid binding	4/590	19/2491	0.693036	0.981447	3648085/3645350/3645772/3635627	CAALFM_C406130WA/CAALFM_C403810WA/CAALFM_C400590CA/BEM1	4	4	3648085/3645350/3645772/3635627	0
MF	GO:0008289	lipid binding	4/590	19/2491	0.693036	0.981447	3648085/3645350/3645772/3635627	CAALFM_C406130WA/CAALFM_C403810WA/CAALFM_C400590CA/BEM1	4	4	3648085/3645350/3645772/3635627	0
MF	GO:0003676	nucleic acid binding	97/590	427/2491	0.717305	0.981447	3636408/3639228/30515262/3645124/3642828/3635694/3637925/3635666/3640267/3642498/3635713/3646280/3640285/3641734/3641646/3639724/3636654/3641162/3644996/3635729/3636404/3639254/3638443/3641806/3646358/3640121/3641749/3643310/3646929/3645324/3647593/3644014/3641598/3642939/3640101/3647851/3647677/3634792/3635700/3642946/3642464/3639238/3644707/3635203/3645208/3644034/3637952/3645658/3641648/364292…	RNY11/CAALFM_C602690CA/CAALFM_C403930CA/CAALFM_CR03110WA/AGO1/ZCF25/RBT7/ZCF26/PBP2/SFL1/CAALFM_C401650CA/CAALFM_C604290WA/ALA1/CAM1/TIF3/MRPL6/CAALFM_C302160CA/CSR1/SWI1/HAP42/PRP22/POL5/CAALFM_C307100CA/CAALFM_C405740CA/CAM1-1/FRS1/REV3/NPL3/EFH1/CAS1/CAALFM_CR05550CA/CAALFM_C601040CA/CAALFM_C601890CA/MSH2/PIN4/CAALFM_C403830WA/RPA190/MSS116/CAALFM_C401280CA/VID21/CAALFM_C105220CA/CAALFM_C60288…	97	39	3636408/30515262/3642828/3635694/3637925/3635666/3635713/3636654/3641162/3644996/3636404/3638443/3641806/3641749/3646929/3645324/3642939/3647851/3635700/3642946/3635203/3645208/3637952/3642929/30515358/3639898/3635187/3638462/3642927/3646519/3640745/3644450/3637896/3642817/3647853/3641794/3636451/3642646/3642818	58	3639228/3645124/3640267/3642498/3646280/3640285/3641734/3641646/3639724/3635729/3639254/3646358/3640121/3643310/3647593/3644014/3641598/3640101/3647677/3634792/3642464/3639238/3644707/3644034/3645658/3641648/3643945/3636205/3635820/3637776/3645108/3647757/3637979/3645881/3635834/3643481/3647692/3645115/3640141/3643461/3637996/3645883/3639237/3643755/3639341/3639378/3641916/3638486/3643308/3634868…
MF	GO:0030234	enzyme regulator activity	6/590	29/2491	0.717344	0.981447	3646953/3636473/3638933/3636917/3640133/3643298	TSC2/CAALFM_C505260WA/AHA1/RPN3/MGE1/GDI1	6	3	3646953/3636473/3638933	3	3636917/3640133/3643298
MF	GO:0004252	serine-type endopeptidase activity	2/590	2491-10-01	0.725609	0.981447	3640999/3639658	PIM1/CAALFM_CR00660WA	2	1	3639658	1	3640999
MF	GO:0016853	isomerase activity	7/590	34/2491	0.728433	0.981447	3638966/3638482/3644034/3636978/3645881/3642927/3647682	INO1/TPI1/TOP1/CYP1/CAALFM_C602350CA/CAALFM_C406950WA/CAALFM_C110620WA	7	2	3636978/3642927	5	3638966/3638482/3644034/3645881/3647682
MF	GO:0008168	methyltransferase activity	9/590	44/2491	0.74868	0.981447	3648179/3647851/3640084/3636655/3642506/3637986/3640977/3644055/3638363	SPB1/CAALFM_C403830WA/MET6/ERG6/RSM22/CAALFM_C700490CA/CAALFM_CR04170WA/CAALFM_C601130WA/CAALFM_C303310CA	9	1	3647851	8	3648179/3640084/3636655/3642506/3637986/3640977/3644055/3638363
MF	GO:0016779	nucleotidyltransferase activity	9/590	44/2491	0.74868	0.981447	3636401/3647593/3647677/3647454/3641808/3637996/3643427/3639378/3639234	CAALFM_C505350WA/CAALFM_CR05550CA/RPA190/SRB1/CGT1/RPA135/RPC40/RPO41/APA2	9	2	3636401/3641808	7	3647593/3647677/3647454/3637996/3643427/3639378/3639234
MF	GO:0000981	RNA polymerase II transcription factor activity, sequence-specific DNA binding	17/590	81/2491	0.758739	0.981447	3639333/3635694/3635666/3635631/3634894/3637727/3634775/3640512/3641886/3637862/3643511/3637776/3640745/3643755/3641916/3641244/3637918	UGA32/ZCF25/ZCF26/ZCF27/LYS143/ZCF22/ARG81/LYS144/UGA33/ARG83/AFT2/CTA7/CAT8/TAC1/SUC1/GAL4/UME7	17	10	3639333/3635694/3635666/3635631/3637727/3640512/3637862/3640745/3641244/3637918	7	3634894/3634775/3641886/3643511/3637776/3643755/3641916
MF	GO:0140110	transcription regulator activity	27/590	126/2491	0.76132	0.981447	30515250/3639333/3635694/3635666/3642498/3635631/3634894/3641128/3637727/3634775/3640512/3641886/3648211/3644103/3637862/3643511/3637776/3637418/3635845/3646859/3640745/3643755/3641916/3641244/3637918/3638515/3639303	MED20/UGA32/ZCF25/ZCF26/SFL1/ZCF27/LYS143/SRB8/ZCF22/ARG81/LYS144/UGA33/MED5/MED18/ARG83/AFT2/CTA7/MED1/SRB9/SOH1/CAT8/TAC1/SUC1/GAL4/UME7/CAALFM_C307050WA/RCA1	27	18	30515250/3639333/3635694/3635666/3635631/3641128/3637727/3640512/3648211/3644103/3637862/3637418/3635845/3646859/3640745/3641244/3637918/3638515	9	3642498/3634894/3634775/3641886/3643511/3637776/3643755/3641916/3639303
MF	GO:0043169	cation binding	58/590	263/2491	0.767289	0.981447	3640295/3635693/3640962/3644994/3639333/3648226/30515248/3647320/3635769/3635694/3645095/3639699/3635666/3635713/3635631/3638884/3642582/3634894/3641745/3646520/3646979/3637727/3635591/3640121/3637426/3647153/3634775/3639700/3635594/3647131/3640084/3637045/3640512/3639009/3641886/3642244/3646424/3644435/3637862/3643299/3643438/3642994/3639326/3637776/3643481/3641400/3641184/3640745/3644450/363650…	CAALFM_C603600CA/CAALFM_C402230CA/DIT2/CAALFM_C400290CA/UGA32/ALK8/SOD1/ARO10/CAALFM_C202020WA/ZCF25/CAALFM_CR03330WA/CAALFM_CR00220WA/ZCF26/CAALFM_C401650CA/ZCF27/CAALFM_C200700WA/CAALFM_CR02780WA/LYS143/CAALFM_C306040WA/CMD1/LAP4/ZCF22/PDC12/FRS1/CAALFM_C203910CA/FET3/ARG81/ALK2/CAALFM_C401820CA/FET34/MET6/ALK6/LYS144/CAALFM_CR09750CA/UGA33/CYM1/CAALFM_C103990WA/CAALFM_C110820CA/ARG83/CAALFM_C1…	58	34	3640295/3635693/3640962/3644994/3639333/3648226/30515248/3647320/3635694/3639699/3635666/3635713/3635631/3642582/3641745/3646520/3646979/3637727/3635591/3639700/3635594/3637045/3640512/3644435/3637862/3642994/3641184/3640745/3644450/3636501/3635766/3641794/3641244/3637918	24	3635769/3645095/3638884/3634894/3640121/3637426/3647153/3634775/3647131/3640084/3639009/3641886/3642244/3646424/3643299/3643438/3639326/3637776/3643481/3641400/3643755/3641916/3641581/3636507
MF	GO:0016791	phosphatase activity	3/590	16/2491	0.768931	0.981447	3646526/3645626/3645129	PPS1/CAALFM_C303860WA/SSU72	3	2	3646526/3645626	1	3645129
MF	GO:0004721	phosphoprotein phosphatase activity	2/590	2491-11-01	0.774934	0.981447	3646526/3645129	PPS1/SSU72	2	1	3646526	1	3645129
MF	GO:0016667	oxidoreductase activity, acting on a sulfur group of donors	2/590	2491-11-01	0.774934	0.981447	30515385/3646660	ERV1/CAALFM_C107630WA	2	0		2	30515385/3646660
MF	GO:0016741	transferase activity, transferring one-carbon groups	10/590	50/2491	0.781079	0.981447	3648179/3647851/3640084/3645728/3636655/3642506/3637986/3640977/3644055/3638363	SPB1/CAALFM_C403830WA/MET6/URA2/ERG6/RSM22/CAALFM_C700490CA/CAALFM_CR04170WA/CAALFM_C601130WA/CAALFM_C303310CA	10	1	3647851	9	3648179/3640084/3645728/3636655/3642506/3637986/3640977/3644055/3638363
MF	GO:0046872	metal ion binding	57/590	261/2491	0.792414	0.981447	3640295/3635693/3640962/3644994/3639333/3648226/30515248/3635769/3635694/3645095/3639699/3635666/3635713/3635631/3638884/3642582/3634894/3641745/3646520/3646979/3637727/3635591/3640121/3637426/3647153/3634775/3639700/3635594/3647131/3640084/3637045/3640512/3639009/3641886/3642244/3646424/3644435/3637862/3643299/3643438/3642994/3639326/3637776/3643481/3641400/3641184/3640745/3644450/3636501/363576…	CAALFM_C603600CA/CAALFM_C402230CA/DIT2/CAALFM_C400290CA/UGA32/ALK8/SOD1/CAALFM_C202020WA/ZCF25/CAALFM_CR03330WA/CAALFM_CR00220WA/ZCF26/CAALFM_C401650CA/ZCF27/CAALFM_C200700WA/CAALFM_CR02780WA/LYS143/CAALFM_C306040WA/CMD1/LAP4/ZCF22/PDC12/FRS1/CAALFM_C203910CA/FET3/ARG81/ALK2/CAALFM_C401820CA/FET34/MET6/ALK6/LYS144/CAALFM_CR09750CA/UGA33/CYM1/CAALFM_C103990WA/CAALFM_C110820CA/ARG83/CAALFM_C114450C…	57	33	3640295/3635693/3640962/3644994/3639333/3648226/30515248/3635694/3639699/3635666/3635713/3635631/3642582/3641745/3646520/3646979/3637727/3635591/3639700/3635594/3637045/3640512/3644435/3637862/3642994/3641184/3640745/3644450/3636501/3635766/3641794/3641244/3637918	24	3635769/3645095/3638884/3634894/3640121/3637426/3647153/3634775/3647131/3640084/3639009/3641886/3642244/3646424/3643299/3643438/3639326/3637776/3643481/3641400/3643755/3641916/3641581/3636507
MF	GO:0008092	cytoskeletal protein binding	4/590	22/2491	0.802182	0.981447	3647093/3637875/3647133/3644578	WAL1/ABP1/CAALFM_C600660CA/CAALFM_C102100WA	4	3	3637875/3647133/3644578	1	3647093
MF	GO:0015077	monovalent inorganic cation transmembrane transporter activity	4/590	22/2491	0.802182	0.981447	3639546/3647141/3640111/30515402	HAK1/NHX1/VMA4/VMA13	4	3	3639546/3640111/30515402	1	3647141
MF	GO:0046873	metal ion transmembrane transporter activity	4/590	22/2491	0.802182	0.981447	3639546/3635861/3635609/3647077	HAK1/ZRT2/CAALFM_C400990WA/CTR1	4	3	3639546/3635861/3635609	1	3647077
MF	GO:0016746	transferase activity, transferring acyl groups	6/590	32/2491	0.805409	0.981447	3635624/3645575/3646036/3639356/3644024/3641881	NMT1/GWT1/KGD2/LRO1/CAALFM_C601300WA/ERG13	6	3	3635624/3645575/3639356	3	3646036/3644024/3641881
MF	GO:0046914	transition metal ion binding	41/590	192/2491	0.809545	0.981447	3640295/3635693/3640962/3644994/3639333/3648226/3635769/3635694/3645095/3639699/3635666/3635713/3635631/3638884/3642582/3634894/3646979/3637727/3647153/3634775/3639700/3647131/3640084/3637045/3640512/3641886/3646424/3644435/3637862/3643299/3642994/3637776/3643481/3641400/3640745/3644450/3643755/3641916/3641794/3641244/3637918	CAALFM_C603600CA/CAALFM_C402230CA/DIT2/CAALFM_C400290CA/UGA32/ALK8/CAALFM_C202020WA/ZCF25/CAALFM_CR03330WA/CAALFM_CR00220WA/ZCF26/CAALFM_C401650CA/ZCF27/CAALFM_C200700WA/CAALFM_CR02780WA/LYS143/LAP4/ZCF22/FET3/ARG81/ALK2/FET34/MET6/ALK6/LYS144/UGA33/CAALFM_C103990WA/CAALFM_C110820CA/ARG83/CAALFM_C114450CA/AMO1/CTA7/CAALFM_C207200WA/ERG5/CAT8/ADA2/TAC1/SUC1/GAT1/GAL4/UME7	41	25	3640295/3635693/3640962/3644994/3639333/3648226/3635694/3639699/3635666/3635713/3635631/3642582/3646979/3637727/3639700/3637045/3640512/3644435/3637862/3642994/3640745/3644450/3641794/3641244/3637918	16	3635769/3645095/3638884/3634894/3647153/3634775/3647131/3640084/3641886/3646424/3643299/3637776/3643481/3641400/3643755/3641916
MF	GO:0008047	enzyme activator activity	2/590	2491-12-01	0.816326	0.981447	3646953/3638933	TSC2/AHA1	2	2	3646953/3638933	0
MF	GO:0017016	Ras GTPase binding	2/590	2491-12-01	0.816326	0.981447	3637434/3643737	ROM2/CDC24	2	0		2	3637434/3643737
MF	GO:0030695	GTPase regulator activity	2/590	2491-12-01	0.816326	0.981447	3646953/3643298	TSC2/GDI1	2	1	3646953	1	3643298
MF	GO:0031267	small GTPase binding	2/590	2491-12-01	0.816326	0.981447	3637434/3643737	ROM2/CDC24	2	0		2	3637434/3643737
MF	GO:0004672	protein kinase activity	20/590	99/2491	0.829196	0.981447	3647733/3641127/3637922/3637393/3640953/3643482/3641888/3641611/3642789/3641144/3645897/3643424/3642643/3644040/3639498/3641237/3645205/3642481/3646075/3641199	MEC1/CAALFM_C404460CA/BUB1/HOG1/HST7/TPK2/MPS1/PTK2/CEK1/SSK2/GCN2/CDC7/SNF1/VPS15/NPR1/AKL1/CAALFM_C207530CA/CAALFM_C105370CA/PKH3/KIN3	20	10	3647733/3641127/3637922/3643482/3642789/3641144/3645897/3644040/3645205/3642481	10	3637393/3640953/3641888/3641611/3643424/3642643/3639498/3641237/3646075/3641199
MF	GO:0140097	catalytic activity, acting on DNA	4/590	23/2491	0.830733	0.981447	3644034/3637913/3647757/3642917	TOP1/CAALFM_C402590CA/CAALFM_C300830CA/CAALFM_C406800WA	4	2	3637913/3642917	2	3644034/3647757
MF	GO:0008135	translation factor activity, RNA binding	3/590	18/2491	0.8366	0.981447	3641734/3646358/3641648	CAM1/CAM1-1/ANB1	3	0		3	3641734/3646358/3641648
MF	GO:0042578	phosphoric ester hydrolase activity	5/590	29/2491	0.852242	0.981447	3635862/3646526/3643806/3645626/3645129	FGR22/PPS1/INP51/CAALFM_C303860WA/SSU72	5	4	3635862/3646526/3643806/3645626	1	3645129
MF	GO:0016772	transferase activity, transferring phosphorus-containing groups	40/590	195/2491	0.880728	0.981447	3647733/3641127/3637922/3644416/3637393/3636401/3647593/3647677/3635594/3640953/3643482/3641888/3641611/3647454/3641015/3642789/3643438/3641144/3644533/3636459/3641808/3645897/3643424/3637996/3642643/3644040/3643427/3638333/3635766/3639498/3643176/3639378/3639234/3635685/3644572/3641237/3645205/3642481/3646075/3641199	MEC1/CAALFM_C404460CA/BUB1/CAALFM_C111080WA/HOG1/CAALFM_C505350WA/CAALFM_CR05550CA/RPA190/CAALFM_C401820CA/HST7/TPK2/MPS1/PTK2/SRB1/HXK2/CEK1/CDC19/SSK2/ADK1/CAALFM_C505130CA/CGT1/GCN2/CDC7/RPA135/SNF1/VPS15/RPC40/THI6/FAB1/NPR1/CAALFM_CR03740CA/RPO41/APA2/CAALFM_C401090CA/CAALFM_C102320CA/AKL1/CAALFM_C207530CA/CAALFM_C105370CA/PKH3/KIN3	40	17	3647733/3641127/3637922/3636401/3635594/3643482/3642789/3641144/3636459/3641808/3645897/3644040/3638333/3635766/3635685/3645205/3642481	23	3644416/3637393/3647593/3647677/3640953/3641888/3641611/3647454/3641015/3643438/3644533/3643424/3637996/3642643/3643427/3639498/3643176/3639378/3639234/3644572/3641237/3646075/3641199
MF	GO:0005198	structural molecule activity	18/590	94/2491	0.882517	0.981447	3639724/3639723/3643513/3639497/3645351/3635662/3645870/3640548/30515335/3646039/3638433/3647413/30515301/3637954/3643347/30515338/3640303/3646057	MRPL6/CAALFM_CR00490WA/CAALFM_C207190CA/MRPL19/NUP84/CLC1/SEC27/CAALFM_C300450CA/RPL32/MRPL8/ECM29/CAALFM_C405180CA/CAALFM_C501540WA/YML6/RPL4B/RPL25/CAALFM_C603730CA/CAALFM_CR07320CA	18	3	3645351/3635662/3647413	15	3639724/3639723/3643513/3639497/3645870/3640548/30515335/3646039/3638433/30515301/3637954/3643347/30515338/3640303/3646057
MF	GO:0022890	inorganic cation transmembrane transporter activity	7/590	41/2491	0.886213	0.981447	3639546/3647141/3635861/3635609/3647077/3640111/30515402	HAK1/NHX1/ZRT2/CAALFM_C400990WA/CTR1/VMA4/VMA13	7	5	3639546/3635861/3635609/3640111/30515402	2	3647141/3647077
MF	GO:0015078	proton transmembrane transporter activity	3/590	20/2491	0.88646	0.981447	3647141/3640111/30515402	NHX1/VMA4/VMA13	3	2	3640111/30515402	1	3647141
MF	GO:0016298	lipase activity	3/590	20/2491	0.88646	0.981447	3634888/3635792/3634797	LIP1/CAALFM_C201920CA/LIP3	3	2	3634888/3634797	1	3635792
MF	GO:0051020	GTPase binding	3/590	20/2491	0.88646	0.981447	3637434/3643737/3635220	ROM2/CDC24/SEC7	3	1	3635220	2	3637434/3643737
MF	GO:0005515	protein binding	96/590	445/2491	0.889061	0.981447	3638301/3648085/3647733/3635769/3639499/3645278/3642828/3640407/3640116/3636572/3638420/3646524/3639254/3637434/3646948/3646358/3644042/3641586/3646811/3644027/3643653/3642574/3636445/3645907/3646292/3641407/3643326/3644767/3641554/3644707/3644841/3640950/3640083/3636461/3637937/3635215/3645870/3645658/3636176/3642653/3634929/3647192/3634800/3637833/3643737/3644548/3647093/3644705/3639317/3635220…	GTT13/CAALFM_C406130WA/MEC1/CAALFM_C202020WA/CAALFM_C106340WA/GST3/AGO1/HSE1/IFU5/BZZ1/TFC4/VPS11/POL5/ROM2/CAALFM_C405350WA/CAM1-1/CAALFM_C601220CA/CAALFM_C500600CA/JAB1/PEX7/GTT1/CAALFM_CR02690WA/ASH2/ASC1/FLO8/CYR1/CAALFM_C114460WA/CAALFM_C104690CA/CAALFM_C500350CA/HHT21/SIS1/CAALFM_CR04600WA/SHP1/CAALFM_C505150CA/GST2/CAALFM_C304790WA/SEC27/HTA1/CAALFM_C112830CA/CAALFM_C500950CA/RTG1/SNL1/VPS…	96	53	3638301/3648085/3647733/3639499/3645278/3642828/3636572/3638420/3646524/3646948/3641586/3646811/3643653/3642574/3636445/3641407/3644767/3644841/3636461/3637937/3636176/3634929/3647192/3634800/3637833/3635220/3647228/3642950/3639547/3637875/3645897/3643177/3644866/3641817/3638933/3640413/3643420/3635621/3643731/3644040/3635629/3647133/3644450/3644423/3644792/3642252/3644578/3640433/3642796/3639528…	43	3635769/3640407/3640116/3639254/3637434/3646358/3644042/3644027/3645907/3646292/3643326/3641554/3644707/3640950/3640083/3635215/3645870/3645658/3642653/3643737/3644548/3647093/3644705/3639317/3645970/3643899/3635820/3647894/3646065/3635834/3647327/3638433/3635757/3643427/3634871/3643770/3641923/3636872/3639245/3640416/3640133/3641623/3640179
MF	GO:0015318	inorganic molecular entity transmembrane transporter activity	9/590	52/2491	0.899485	0.981447	3639546/3642303/3647141/3635861/3635609/3647077/3640111/3645419/30515402	HAK1/YVC1/NHX1/ZRT2/CAALFM_C400990WA/CTR1/VMA4/HSP30/VMA13	9	7	3639546/3642303/3635861/3635609/3640111/3645419/30515402	2	3647141/3647077
MF	GO:0016747	transferase activity, transferring acyl groups other than amino-acyl groups	2/590	15/2491	0.902607	0.981447	3635624/3639356	NMT1/LRO1	2	2	3635624/3639356	0
MF	GO:0003700	DNA binding transcription factor activity	19/590	102/2491	0.913749	0.981447	3639333/3635694/3635666/3642498/3635631/3634894/3637727/3634775/3640512/3641886/3637862/3643511/3637776/3640745/3643755/3641916/3641244/3637918/3639303	UGA32/ZCF25/ZCF26/SFL1/ZCF27/LYS143/ZCF22/ARG81/LYS144/UGA33/ARG83/AFT2/CTA7/CAT8/TAC1/SUC1/GAL4/UME7/RCA1	19	10	3639333/3635694/3635666/3635631/3637727/3640512/3637862/3640745/3641244/3637918	9	3642498/3634894/3634775/3641886/3643511/3637776/3643755/3641916/3639303
MF	GO:0035091	phosphatidylinositol binding	2/590	16/2491	0.921703	0.981447	3645350/3635627	CAALFM_C403810WA/BEM1	2	2	3645350/3635627	0
MF	GO:0008324	cation transmembrane transporter activity	8/590	50/2491	0.933268	0.981447	3639546/3644867/3647141/3635861/3635609/3647077/3640111/30515402	HAK1/CAALFM_CR06230WA/NHX1/ZRT2/CAALFM_C400990WA/CTR1/VMA4/VMA13	8	5	3639546/3635861/3635609/3640111/30515402	3	3644867/3647141/3647077
MF	GO:0003774	motor activity	1/590	2491-10-01	0.933374	0.981447	3644578	CAALFM_C102100WA	1	1	3644578	0
MF	GO:0044877	protein-containing complex binding	1/590	2491-10-01	0.933374	0.981447	3641648	ANB1	1	0		1	3641648
MF	GO:0051536	iron-sulfur cluster binding	2/590	17/2491	0.937233	0.981447	3644994/3645873	CAALFM_C400290CA/CAALFM_C602290CA	2	1	3644994	1	3645873
MF	GO:0051540	metal cluster binding	2/590	17/2491	0.937233	0.981447	3644994/3645873	CAALFM_C400290CA/CAALFM_C602290CA	2	1	3644994	1	3645873
MF	GO:0003677	DNA binding	36/590	187/2491	0.944607	0.981447	3635694/3635666/3642498/3644996/3635729/3639254/3641806/3641749/3646929/3645324/3647593/3642939/3647677/3642946/3644707/3644034/3637952/3645658/3643945/30515358/3639898/3637776/3647757/3635834/3638462/3646519/3640745/3637996/3644450/3643755/3637896/3642817/3639378/3641916/3641794/3640246	ZCF25/ZCF26/SFL1/SWI1/HAP42/POL5/CAALFM_C405740CA/REV3/EFH1/CAS1/CAALFM_CR05550CA/MSH2/RPA190/VID21/HHT21/TOP1/YOX1/HTA1/RAP1/HHO1/RIM1/CTA7/CAALFM_C300830CA/RAD23/CAALFM_C307660WA/CAALFM_C406020CA/CAT8/RPA135/ADA2/TAC1/CAALFM_C402820WA/MPH1/RPO41/SUC1/GAT1/CAALFM_C603550CA	36	19	3635694/3635666/3644996/3641806/3641749/3646929/3645324/3642939/3642946/3637952/30515358/3639898/3638462/3646519/3640745/3644450/3637896/3642817/3641794	17	3642498/3635729/3639254/3647593/3647677/3644707/3644034/3645658/3643945/3637776/3647757/3635834/3637996/3643755/3639378/3641916/3640246
MF	GO:0015075	ion transmembrane transporter activity	10/590	62/2491	0.946867	0.981447	3639546/3642303/3644867/3647141/3635861/3635609/3647077/3640111/3645419/30515402	HAK1/YVC1/CAALFM_CR06230WA/NHX1/ZRT2/CAALFM_C400990WA/CTR1/VMA4/HSP30/VMA13	10	7	3639546/3642303/3635861/3635609/3640111/3645419/30515402	3	3644867/3647141/3647077
MF	GO:0016836	hydro-lyase activity	1/590	2491-11-01	0.949218	0.981447	3642582	CAALFM_CR02780WA	1	1	3642582	0
MF	GO:0008270	zinc ion binding	28/590	151/2491	0.951706	0.981447	3639333/3635769/3635694/3645095/3635666/3635713/3635631/3638884/3642582/3634894/3646979/3637727/3634775/3640084/3640512/3641886/3646424/3644435/3637862/3637776/3643481/3640745/3644450/3643755/3641916/3641794/3641244/3637918	UGA32/CAALFM_C202020WA/ZCF25/CAALFM_CR03330WA/ZCF26/CAALFM_C401650CA/ZCF27/CAALFM_C200700WA/CAALFM_CR02780WA/LYS143/LAP4/ZCF22/ARG81/MET6/LYS144/UGA33/CAALFM_C103990WA/CAALFM_C110820CA/ARG83/CTA7/CAALFM_C207200WA/CAT8/ADA2/TAC1/SUC1/GAT1/GAL4/UME7	28	16	3639333/3635694/3635666/3635713/3635631/3642582/3646979/3637727/3640512/3644435/3637862/3640745/3644450/3641794/3641244/3637918	12	3635769/3645095/3638884/3634894/3634775/3640084/3641886/3646424/3637776/3643481/3643755/3641916
MF	GO:0016835	carbon-oxygen lyase activity	1/590	2491-12-01	0.961299	0.982672	3642582	CAALFM_CR02780WA	1	1	3642582	0
MF	GO:0043565	sequence-specific DNA binding	2/590	20/2491	0.968132	0.982672	3642498/3641794	SFL1/GAT1	2	1	3641794	1	3642498
MF	GO:0003735	structural constituent of ribosome	13/590	82/2491	0.970761	0.982672	3639724/3639723/3643513/3639497/3640548/30515335/3646039/30515301/3637954/3643347/30515338/3640303/3646057	MRPL6/CAALFM_CR00490WA/CAALFM_C207190CA/MRPL19/CAALFM_C300450CA/RPL32/MRPL8/CAALFM_C501540WA/YML6/RPL4B/RPL25/CAALFM_C603730CA/CAALFM_CR07320CA	13	0		13	3639724/3639723/3643513/3639497/3640548/30515335/3646039/30515301/3637954/3643347/30515338/3640303/3646057
MF	GO:0019899	enzyme binding	3/590	28/2491	0.976754	0.98271	3637434/3643737/3635220	ROM2/CDC24/SEC7	3	1	3635220	2	3637434/3643737
MF	GO:0009055	electron transfer activity	1/590	18/2491	0.992438	0.992438	3646660	CAALFM_C107630WA	1	0		1	3646660
