# Supplementary material for: Genetic Insights into the Rheological Phenotype of Candida albicans Biofilms
Source: Research Square preprint supplement (doi:10.21203/rs.3.rs-8555167/v1), 2026-01-20
Supplement: Supplementary file 7 [file 8a3f4e60644919a4ad7e4271.xlsx]

## Sheet: pmr1_delvsWT.all_GOenrich
Transcriptional profiling (GO Biological Process term enrichment) -- pmr1∆/∆ vs wild type
Category	GOID	Description	GeneRatio	BgRatio	pvalue	padj	geneID	geneName	Count	Up	Up_Gene_id	Down	Down_Gene_id
BP	GO:0006412	translation	49/396	129/1861	5.05e-06	0.000787593	3640275/30515338/3647558/3646039/30515335/3645956/3636850/3642478/30515328/3640285/3645137/3641648/3642934/3640224/3647719/3636659/3636841/30515208/3639724/3647063/3635257/3637400/3640242/3643347/3640303/3636398/3643678/3638020/3639551/3637057/3639723/30515267/3636924/30515014/3639497/3636573/3646086/3639338/30515006/3637953/3637954/3646057/3640168/30515041/3635615/3643513/3635787/30515207/305149…	NAM2/RPL25/RPL23A/MRPL8/RPL32/ILS1/RPL10/CAALFM_C105400CA/RPS13/ALA1/CAALFM_CR03400WA/ANB1/UBI3/MRP20/RPL3/RPL12/RPL13/RPS19A/MRPL6/CAALFM_C501550CA/RPL19A/RPL21A/RPS21/RPL4B/CAALFM_C603730CA/MSM1/YST1/CAALFM_C701020CA/RPS22A/RPL5/CAALFM_CR00490WA/CAALFM_C404390WA/RPS1/CAALFM_C106890CA/MRPL19/RPS7A/CAALFM_C600390WA/RPL16A/RPS14B/RPS18/YML6/CAALFM_CR07320CA/CAALFM_CR01370CA/RPL42/RPL20B/CAALFM_C20…	49	0		49	3640275/30515338/3647558/3646039/30515335/3645956/3636850/3642478/30515328/3640285/3645137/3641648/3642934/3640224/3647719/3636659/3636841/30515208/3639724/3647063/3635257/3637400/3640242/3643347/3640303/3636398/3643678/3638020/3639551/3637057/3639723/30515267/3636924/30515014/3639497/3636573/3646086/3639338/30515006/3637953/3637954/3646057/3640168/30515041/3635615/3643513/3635787/30515207/305149…
BP	GO:0043043	peptide biosynthetic process	49/396	130/1861	6.54e-06	0.000787593	3640275/30515338/3647558/3646039/30515335/3645956/3636850/3642478/30515328/3640285/3645137/3641648/3642934/3640224/3647719/3636659/3636841/30515208/3639724/3647063/3635257/3637400/3640242/3643347/3640303/3636398/3643678/3638020/3639551/3637057/3639723/30515267/3636924/30515014/3639497/3636573/3646086/3639338/30515006/3637953/3637954/3646057/3640168/30515041/3635615/3643513/3635787/30515207/305149…	NAM2/RPL25/RPL23A/MRPL8/RPL32/ILS1/RPL10/CAALFM_C105400CA/RPS13/ALA1/CAALFM_CR03400WA/ANB1/UBI3/MRP20/RPL3/RPL12/RPL13/RPS19A/MRPL6/CAALFM_C501550CA/RPL19A/RPL21A/RPS21/RPL4B/CAALFM_C603730CA/MSM1/YST1/CAALFM_C701020CA/RPS22A/RPL5/CAALFM_CR00490WA/CAALFM_C404390WA/RPS1/CAALFM_C106890CA/MRPL19/RPS7A/CAALFM_C600390WA/RPL16A/RPS14B/RPS18/YML6/CAALFM_CR07320CA/CAALFM_CR01370CA/RPL42/RPL20B/CAALFM_C20…	49	0		49	3640275/30515338/3647558/3646039/30515335/3645956/3636850/3642478/30515328/3640285/3645137/3641648/3642934/3640224/3647719/3636659/3636841/30515208/3639724/3647063/3635257/3637400/3640242/3643347/3640303/3636398/3643678/3638020/3639551/3637057/3639723/30515267/3636924/30515014/3639497/3636573/3646086/3639338/30515006/3637953/3637954/3646057/3640168/30515041/3635615/3643513/3635787/30515207/305149…
BP	GO:0006518	peptide metabolic process	49/396	133/1861	1.38e-05	0.00110693	3640275/30515338/3647558/3646039/30515335/3645956/3636850/3642478/30515328/3640285/3645137/3641648/3642934/3640224/3647719/3636659/3636841/30515208/3639724/3647063/3635257/3637400/3640242/3643347/3640303/3636398/3643678/3638020/3639551/3637057/3639723/30515267/3636924/30515014/3639497/3636573/3646086/3639338/30515006/3637953/3637954/3646057/3640168/30515041/3635615/3643513/3635787/30515207/305149…	NAM2/RPL25/RPL23A/MRPL8/RPL32/ILS1/RPL10/CAALFM_C105400CA/RPS13/ALA1/CAALFM_CR03400WA/ANB1/UBI3/MRP20/RPL3/RPL12/RPL13/RPS19A/MRPL6/CAALFM_C501550CA/RPL19A/RPL21A/RPS21/RPL4B/CAALFM_C603730CA/MSM1/YST1/CAALFM_C701020CA/RPS22A/RPL5/CAALFM_CR00490WA/CAALFM_C404390WA/RPS1/CAALFM_C106890CA/MRPL19/RPS7A/CAALFM_C600390WA/RPL16A/RPS14B/RPS18/YML6/CAALFM_CR07320CA/CAALFM_CR01370CA/RPL42/RPL20B/CAALFM_C20…	49	0		49	3640275/30515338/3647558/3646039/30515335/3645956/3636850/3642478/30515328/3640285/3645137/3641648/3642934/3640224/3647719/3636659/3636841/30515208/3639724/3647063/3635257/3637400/3640242/3643347/3640303/3636398/3643678/3638020/3639551/3637057/3639723/30515267/3636924/30515014/3639497/3636573/3646086/3639338/30515006/3637953/3637954/3646057/3640168/30515041/3635615/3643513/3635787/30515207/305149…
BP	GO:0043604	amide biosynthetic process	49/396	136/1861	2.79e-05	0.00168203	3640275/30515338/3647558/3646039/30515335/3645956/3636850/3642478/30515328/3640285/3645137/3641648/3642934/3640224/3647719/3636659/3636841/30515208/3639724/3647063/3635257/3637400/3640242/3643347/3640303/3636398/3643678/3638020/3639551/3637057/3639723/30515267/3636924/30515014/3639497/3636573/3646086/3639338/30515006/3637953/3637954/3646057/3640168/30515041/3635615/3643513/3635787/30515207/305149…	NAM2/RPL25/RPL23A/MRPL8/RPL32/ILS1/RPL10/CAALFM_C105400CA/RPS13/ALA1/CAALFM_CR03400WA/ANB1/UBI3/MRP20/RPL3/RPL12/RPL13/RPS19A/MRPL6/CAALFM_C501550CA/RPL19A/RPL21A/RPS21/RPL4B/CAALFM_C603730CA/MSM1/YST1/CAALFM_C701020CA/RPS22A/RPL5/CAALFM_CR00490WA/CAALFM_C404390WA/RPS1/CAALFM_C106890CA/MRPL19/RPS7A/CAALFM_C600390WA/RPL16A/RPS14B/RPS18/YML6/CAALFM_CR07320CA/CAALFM_CR01370CA/RPL42/RPL20B/CAALFM_C20…	49	0		49	3640275/30515338/3647558/3646039/30515335/3645956/3636850/3642478/30515328/3640285/3645137/3641648/3642934/3640224/3647719/3636659/3636841/30515208/3639724/3647063/3635257/3637400/3640242/3643347/3640303/3636398/3643678/3638020/3639551/3637057/3639723/30515267/3636924/30515014/3639497/3636573/3646086/3639338/30515006/3637953/3637954/3646057/3640168/30515041/3635615/3643513/3635787/30515207/305149…
BP	GO:0043603	cellular amide metabolic process	49/396	142/1861	0.000102604	0.00494553	3640275/30515338/3647558/3646039/30515335/3645956/3636850/3642478/30515328/3640285/3645137/3641648/3642934/3640224/3647719/3636659/3636841/30515208/3639724/3647063/3635257/3637400/3640242/3643347/3640303/3636398/3643678/3638020/3639551/3637057/3639723/30515267/3636924/30515014/3639497/3636573/3646086/3639338/30515006/3637953/3637954/3646057/3640168/30515041/3635615/3643513/3635787/30515207/305149…	NAM2/RPL25/RPL23A/MRPL8/RPL32/ILS1/RPL10/CAALFM_C105400CA/RPS13/ALA1/CAALFM_CR03400WA/ANB1/UBI3/MRP20/RPL3/RPL12/RPL13/RPS19A/MRPL6/CAALFM_C501550CA/RPL19A/RPL21A/RPS21/RPL4B/CAALFM_C603730CA/MSM1/YST1/CAALFM_C701020CA/RPS22A/RPL5/CAALFM_CR00490WA/CAALFM_C404390WA/RPS1/CAALFM_C106890CA/MRPL19/RPS7A/CAALFM_C600390WA/RPL16A/RPS14B/RPS18/YML6/CAALFM_CR07320CA/CAALFM_CR01370CA/RPL42/RPL20B/CAALFM_C20…	49	0		49	3640275/30515338/3647558/3646039/30515335/3645956/3636850/3642478/30515328/3640285/3645137/3641648/3642934/3640224/3647719/3636659/3636841/30515208/3639724/3647063/3635257/3637400/3640242/3643347/3640303/3636398/3643678/3638020/3639551/3637057/3639723/30515267/3636924/30515014/3639497/3636573/3646086/3639338/30515006/3637953/3637954/3646057/3640168/30515041/3635615/3643513/3635787/30515207/305149…
BP	GO:1901566	organonitrogen compound biosynthetic process	73/396	238/1861	0.000171062	0.00687098	3644012/3637784/3640275/30515338/3647558/3641607/3646039/30515335/3645956/3647071/3646425/3645575/3636850/3642478/30515328/3640285/3644405/3645137/3641648/3639339/3642934/3640224/3647719/3644116/3636659/3636841/30515208/3639724/3647063/3635257/3637400/3643674/3638346/3635826/3640242/3643347/3641233/3640303/3636398/3643678/3639691/3638020/3639551/3645211/3645025/3637057/3639723/30515267/3647777/36…	ILV5/MNN1/NAM2/RPL25/RPL23A/CAALFM_C601370WA/MRPL8/RPL32/ILS1/COX15/KTR4/GWT1/RPL10/CAALFM_C105400CA/RPS13/ALA1/MNN2/CAALFM_CR03400WA/ANB1/LEU4/UBI3/MRP20/RPL3/SPE2/RPL12/RPL13/RPS19A/MRPL6/CAALFM_C501550CA/RPL19A/RPL21A/DIE2/PHA2/HOM2/RPS21/RPL4B/CAALFM_C210860CA/CAALFM_C603730CA/MSM1/YST1/ARG1/CAALFM_C701020CA/RPS22A/HEM15/HIS4/RPL5/CAALFM_CR00490WA/CAALFM_C404390WA/HIS3/RPS1/CAALFM_C106890CA/M…	73	9	3637784/3646425/3645575/3644116/3643674/3639519/3638789/3644794/3635743	64	3644012/3640275/30515338/3647558/3641607/3646039/30515335/3645956/3647071/3636850/3642478/30515328/3640285/3644405/3645137/3641648/3639339/3642934/3640224/3647719/3636659/3636841/30515208/3639724/3647063/3635257/3637400/3638346/3635826/3640242/3643347/3641233/3640303/3636398/3643678/3639691/3638020/3639551/3645211/3645025/3637057/3639723/30515267/3647777/3636924/30515014/3639497/3641117/3636573/3…
BP	GO:0019538	protein metabolic process	99/396	382/1861	0.00865558	0.261959	3637784/3644836/3640275/3634866/30515338/3647558/3641607/3646039/30515335/3645956/3638884/3646074/3636589/3646425/3645575/3643295/3646075/3647903/3636850/3642478/3645897/3640999/30515328/3640285/3644405/3635769/3645040/3635164/3645137/3641648/3636500/3642934/3640224/3647719/3641888/3636659/3636841/30515208/3639724/3647063/3641012/3635257/3634879/3638940/3637400/3643674/3639558/3640242/3643347/364…	MNN1/CAALFM_CR06040WA/NAM2/SWE1/RPL25/RPL23A/CAALFM_C601370WA/MRPL8/RPL32/ILS1/CAALFM_C200700WA/CAALFM_C600340CA/AFG3/KTR4/GWT1/DDI1/PKH3/CAALFM_C600170CA/RPL10/CAALFM_C105400CA/GCN2/PIM1/RPS13/ALA1/MNN2/CAALFM_C202020WA/STE24/CAALFM_C304970CA/CAALFM_CR03400WA/ANB1/PRE1/UBI3/MRP20/RPL3/MPS1/RPL12/RPL13/RPS19A/MRPL6/CAALFM_C501550CA/LAP3/RPL19A/TPK1/PTP3/RPL21A/DIE2/CAALFM_C106390WA/RPS21/RPL4B/CA…	99	21	3637784/3644836/3634866/3646425/3645575/3645897/3641012/3634879/3643674/3646497/3647784/3647858/3637922/3646158/3642459/3642097/3644838/3638789/3644794/3642789/3635743	78	3640275/30515338/3647558/3641607/3646039/30515335/3645956/3638884/3646074/3636589/3643295/3646075/3647903/3636850/3642478/3640999/30515328/3640285/3644405/3635769/3645040/3635164/3645137/3641648/3636500/3642934/3640224/3647719/3641888/3636659/3636841/30515208/3639724/3647063/3635257/3638940/3637400/3639558/3640242/3643347/3645874/3640303/3636398/3643678/3638020/3636636/3639551/3642643/3642244/363…
BP	GO:1901605	alpha-amino acid metabolic process	10/396	22/1861	0.00926613	0.261959	3639339/3638382/3639321/3638346/3639691/3645025/3647777/3643808/3648087/3639519	LEU4/MET13/TRP1/PHA2/ARG1/HIS4/HIS3/LEU42/TRP5/GLT1	10	1	3639519	9	3639339/3638382/3639321/3638346/3639691/3645025/3647777/3643808/3648087
BP	GO:0008652	cellular amino acid biosynthetic process	9/396	19/1861	0.0097827	0.261959	3644012/3639339/3638346/3635826/3639691/3645025/3647777/3643808/3639519	ILV5/LEU4/PHA2/HOM2/ARG1/HIS4/HIS3/LEU42/GLT1	9	1	3639519	8	3644012/3639339/3638346/3635826/3639691/3645025/3647777/3643808
BP	GO:0044267	cellular protein metabolic process	90/396	348/1861	0.0134542	0.324245	3637784/3644836/3640275/3634866/30515338/3647558/3641607/3646039/30515335/3645956/3646425/3645575/3646075/3647903/3636850/3642478/3645897/30515328/3640285/3644405/3635769/3635164/3645137/3641648/3636500/3642934/3640224/3647719/3641888/3636659/3636841/30515208/3639724/3647063/3635257/3634879/3638940/3637400/3643674/3639558/3640242/3643347/3645874/3640303/3636398/3643678/3638020/3646497/3636636/363…	MNN1/CAALFM_CR06040WA/NAM2/SWE1/RPL25/RPL23A/CAALFM_C601370WA/MRPL8/RPL32/ILS1/KTR4/GWT1/PKH3/CAALFM_C600170CA/RPL10/CAALFM_C105400CA/GCN2/RPS13/ALA1/MNN2/CAALFM_C202020WA/CAALFM_C304970CA/CAALFM_CR03400WA/ANB1/PRE1/UBI3/MRP20/RPL3/MPS1/RPL12/RPL13/RPS19A/MRPL6/CAALFM_C501550CA/RPL19A/TPK1/PTP3/RPL21A/DIE2/CAALFM_C106390WA/RPS21/RPL4B/CAALFM_C602300CA/CAALFM_C603730CA/MSM1/YST1/CAALFM_C701020CA/C…	90	19	3637784/3644836/3634866/3646425/3645575/3645897/3634879/3643674/3646497/3647784/3647858/3637922/3646158/3642459/3644838/3638789/3644794/3642789/3635743	71	3640275/30515338/3647558/3641607/3646039/30515335/3645956/3646075/3647903/3636850/3642478/30515328/3640285/3644405/3635769/3635164/3645137/3641648/3636500/3642934/3640224/3647719/3641888/3636659/3636841/30515208/3639724/3647063/3635257/3638940/3637400/3639558/3640242/3643347/3645874/3640303/3636398/3643678/3638020/3636636/3639551/3642643/3635812/3639317/3637057/3639723/30515267/3636924/30515014/3…
BP	GO:1901564	organonitrogen compound metabolic process	120/396	489/1861	0.024305	0.532501	3644012/3637784/3644836/3640275/3634866/30515338/3645124/3647558/3641607/3646039/30515335/3636824/3645956/3638884/3646074/3647071/3636589/3646425/3645575/3643295/3639180/3646075/3647903/3636850/3642478/3645897/3640999/30515328/3640285/3644405/3635769/3645040/3635164/3645137/3641648/3636500/3639339/3642934/3638426/3640224/3647719/3644116/3641888/3636659/3636841/30515208/3639724/3647063/3641012/363…	ILV5/MNN1/CAALFM_CR06040WA/NAM2/SWE1/RPL25/CAALFM_CR03110WA/RPL23A/CAALFM_C601370WA/MRPL8/RPL32/FRS2/ILS1/CAALFM_C200700WA/CAALFM_C600340CA/COX15/AFG3/KTR4/GWT1/DDI1/ARG3/PKH3/CAALFM_C600170CA/RPL10/CAALFM_C105400CA/GCN2/PIM1/RPS13/ALA1/MNN2/CAALFM_C202020WA/STE24/CAALFM_C304970CA/CAALFM_CR03400WA/ANB1/PRE1/LEU4/UBI3/PNP1/MRP20/RPL3/SPE2/MPS1/RPL12/RPL13/RPS19A/MRPL6/CAALFM_C501550CA/LAP3/MET13/R…	120	25	3637784/3644836/3634866/3636824/3646425/3645575/3645897/3638426/3644116/3641012/3634879/3643674/3646497/3647784/3647858/3637922/3646158/3642459/3642097/3644838/3639519/3638789/3644794/3642789/3635743	95	3644012/3640275/30515338/3645124/3647558/3641607/3646039/30515335/3645956/3638884/3646074/3647071/3636589/3643295/3639180/3646075/3647903/3636850/3642478/3640999/30515328/3640285/3644405/3635769/3645040/3635164/3645137/3641648/3636500/3639339/3642934/3640224/3647719/3641888/3636659/3636841/30515208/3639724/3647063/3638382/3635257/3639321/3639233/3638940/3637400/3638346/3635826/3639558/3640242/364…
BP	GO:0006520	cellular amino acid metabolic process	21/396	66/1861	0.0278113	0.543127	3644012/3640275/3645124/3636824/3645956/3639180/3640285/3645137/3639339/3638382/3639321/3638346/3635826/3636398/3639691/3645025/3647777/3646086/3643808/3648087/3639519	ILV5/NAM2/CAALFM_CR03110WA/FRS2/ILS1/ARG3/ALA1/CAALFM_CR03400WA/LEU4/MET13/TRP1/PHA2/HOM2/MSM1/ARG1/HIS4/HIS3/CAALFM_C600390WA/LEU42/TRP5/GLT1	21	2	3636824/3639519	19	3644012/3640275/3645124/3645956/3639180/3640285/3645137/3639339/3638382/3639321/3638346/3635826/3636398/3639691/3645025/3647777/3646086/3643808/3648087
BP	GO:0006629	lipid metabolic process	25/396	82/1861	0.0292973	0.543127	3638966/3644557/3634797/3634854/3642985/3645987/3641607/3645575/3635716/3644045/3644562/3643674/3645440/3636655/3647039/3639688/3647089/3639181/3636505/3640755/3636598/3636529/3644046/3647957/3642076	INO1/CHO1/LIP3/LIP2/PLC2/LIP4/CAALFM_C601370WA/GWT1/ERG251/HAL21/PLB2/DIE2/ERG20/ERG6/SPO1/ACC1/PLB3/CAALFM_C603240WA/GDE1/OLE1/POX1-3/DES1/CAALFM_C600980CA/MSS4/CAALFM_CR08300CA	25	15	3644557/3634797/3634854/3642985/3645575/3635716/3643674/3645440/3647039/3639688/3647089/3636505/3640755/3636598/3647957	10	3638966/3645987/3641607/3644045/3644562/3636655/3639181/3636529/3644046/3642076
BP	GO:1901607	alpha-amino acid biosynthetic process	7/396	16/1861	0.0359015	0.618019	3639339/3638346/3639691/3645025/3647777/3643808/3639519	LEU4/PHA2/ARG1/HIS4/HIS3/LEU42/GLT1	7	1	3639519	6	3639339/3638346/3639691/3645025/3647777/3643808
BP	GO:0055114	oxidation-reduction process	65/396	255/1861	0.0477106	0.766551	3647152/3644012/3635693/3640751/3639700/3639667/3644060/3647151/3647153/3644934/3641603/3647071/3641618/3638306/3636576/3642989/3636954/3643411/3643452/3635852/3634810/3644563/3642919/3635716/3638354/3644010/3644077/3643782/3645036/3639205/3642921/3646841/3645100/3638532/3639699/3642078/3645950/3639871/3638382/30515385/3643778/3639233/3636507/3643458/3635826/3645217/3641757/3642030/3644778/364378…	FET99/ILV5/CAALFM_C402230CA/ADH2/ALK2/MDH1/EBP1/FET31/FET3/IDP2/OYE2/COX15/OYE23/CAALFM_C303470WA/CAALFM_C302070CA/RNR1/CAALFM_C702010CA/ARH2/FRE9/FMO1/ERO1/GPD2/OYE32/ERG251/NDE1/CAALFM_C600850WA/ECM17/CAALFM_C209850CA/PRO3/CAALFM_C602560WA/GUT2/FRE10/IFR2/PRO2/CAALFM_CR00220WA/CAALFM_CR08310CA/CAALFM_C604410CA/CAALFM_C105990CA/MET13/ERV1/SMM1/QCR7/CAALFM_C504530WA/CAALFM_C205130WA/HOM2/RNR22/CA…	65	25	3635693/3640751/3639700/3636576/3636954/3643411/3635852/3634810/3635716/3638354/3643782/3642921/3639699/3642078/3639871/3643778/3643458/3641757/3644778/3643781/3646961/3638881/3636598/3639519/3645214	40	3647152/3644012/3639667/3644060/3647151/3647153/3644934/3641603/3647071/3641618/3638306/3642989/3643452/3644563/3642919/3644010/3644077/3645036/3639205/3646841/3645100/3638532/3645950/3638382/30515385/3639233/3636507/3635826/3645217/3642030/3645025/3638393/3634819/3642612/3638923/3647131/3639181/3634945/3641615/3638034
BP	GO:0044255	cellular lipid metabolic process	13/396	40/1861	0.0644448	0.927381	3638966/3644557/3641607/3645575/3644045/3644562/3643674/3645440/3647039/3639688/3647089/3636598/3647957	INO1/CHO1/CAALFM_C601370WA/GWT1/HAL21/PLB2/DIE2/ERG20/SPO1/ACC1/PLB3/POX1-3/MSS4	13	9	3644557/3645575/3643674/3645440/3647039/3639688/3647089/3636598/3647957	4	3638966/3641607/3644045/3644562
BP	GO:0016053	organic acid biosynthetic process	10/396	29/1861	0.0692649	0.927381	3644012/3639339/3638346/3635826/3639691/3645025/3647777/3639688/3643808/3639519	ILV5/LEU4/PHA2/HOM2/ARG1/HIS4/HIS3/ACC1/LEU42/GLT1	10	2	3639688/3639519	8	3644012/3639339/3638346/3635826/3639691/3645025/3647777/3643808
BP	GO:0046394	carboxylic acid biosynthetic process	10/396	29/1861	0.0692649	0.927381	3644012/3639339/3638346/3635826/3639691/3645025/3647777/3639688/3643808/3639519	ILV5/LEU4/PHA2/HOM2/ARG1/HIS4/HIS3/ACC1/LEU42/GLT1	10	2	3639688/3639519	8	3644012/3639339/3638346/3635826/3639691/3645025/3647777/3643808
BP	GO:0016042	lipid catabolic process	7/396	19/1861	0.0882811	0.999999	3634797/3634854/3645987/3644562/3647039/3647089/3636598	LIP3/LIP2/LIP4/PLB2/SPO1/PLB3/POX1-3	7	5	3634797/3634854/3647039/3647089/3636598	2	3645987/3644562
BP	GO:0006644	phospholipid metabolic process	9/396	28/1861	0.120733	0.999999	3638966/3644557/3641607/3645575/3644045/3644562/3647039/3647089/3647957	INO1/CHO1/CAALFM_C601370WA/GWT1/HAL21/PLB2/SPO1/PLB3/MSS4	9	5	3644557/3645575/3647039/3647089/3647957	4	3638966/3641607/3644045/3644562
BP	GO:0006082	organic acid metabolic process	23/396	87/1861	0.142844	0.999999	3644012/3640275/3645124/3636824/3645956/3639180/3640285/3645137/3639339/3638382/3639321/3638346/3635826/3636398/3639691/3645025/3647777/3646086/3639688/3643808/3636598/3648087/3639519	ILV5/NAM2/CAALFM_CR03110WA/FRS2/ILS1/ARG3/ALA1/CAALFM_CR03400WA/LEU4/MET13/TRP1/PHA2/HOM2/MSM1/ARG1/HIS4/HIS3/CAALFM_C600390WA/ACC1/LEU42/POX1-3/TRP5/GLT1	23	4	3636824/3639688/3636598/3639519	19	3644012/3640275/3645124/3645956/3639180/3640285/3645137/3639339/3638382/3639321/3638346/3635826/3636398/3639691/3645025/3647777/3646086/3643808/3648087
BP	GO:0019752	carboxylic acid metabolic process	23/396	87/1861	0.142844	0.999999	3644012/3640275/3645124/3636824/3645956/3639180/3640285/3645137/3639339/3638382/3639321/3638346/3635826/3636398/3639691/3645025/3647777/3646086/3639688/3643808/3636598/3648087/3639519	ILV5/NAM2/CAALFM_CR03110WA/FRS2/ILS1/ARG3/ALA1/CAALFM_CR03400WA/LEU4/MET13/TRP1/PHA2/HOM2/MSM1/ARG1/HIS4/HIS3/CAALFM_C600390WA/ACC1/LEU42/POX1-3/TRP5/GLT1	23	4	3636824/3639688/3636598/3639519	19	3644012/3640275/3645124/3645956/3639180/3640285/3645137/3639339/3638382/3639321/3638346/3635826/3636398/3639691/3645025/3647777/3646086/3643808/3648087
BP	GO:0043436	oxoacid metabolic process	23/396	87/1861	0.142844	0.999999	3644012/3640275/3645124/3636824/3645956/3639180/3640285/3645137/3639339/3638382/3639321/3638346/3635826/3636398/3639691/3645025/3647777/3646086/3639688/3643808/3636598/3648087/3639519	ILV5/NAM2/CAALFM_CR03110WA/FRS2/ILS1/ARG3/ALA1/CAALFM_CR03400WA/LEU4/MET13/TRP1/PHA2/HOM2/MSM1/ARG1/HIS4/HIS3/CAALFM_C600390WA/ACC1/LEU42/POX1-3/TRP5/GLT1	23	4	3636824/3639688/3636598/3639519	19	3644012/3640275/3645124/3645956/3639180/3640285/3645137/3639339/3638382/3639321/3638346/3635826/3636398/3639691/3645025/3647777/3646086/3643808/3648087
BP	GO:0006486	protein glycosylation	9/396	29/1861	0.143894	0.999999	3637784/3646425/3644405/3643674/3641117/3645443/3638789/3644794/3635743	MNN1/KTR4/MNN2/DIE2/MNN22/KTR2/MNN24/MNN15/STT3	9	6	3637784/3646425/3643674/3638789/3644794/3635743	3	3644405/3641117/3645443
BP	GO:0009100	glycoprotein metabolic process	9/396	29/1861	0.143894	0.999999	3637784/3646425/3644405/3643674/3641117/3645443/3638789/3644794/3635743	MNN1/KTR4/MNN2/DIE2/MNN22/KTR2/MNN24/MNN15/STT3	9	6	3637784/3646425/3643674/3638789/3644794/3635743	3	3644405/3641117/3645443
BP	GO:0009101	glycoprotein biosynthetic process	9/396	29/1861	0.143894	0.999999	3637784/3646425/3644405/3643674/3641117/3645443/3638789/3644794/3635743	MNN1/KTR4/MNN2/DIE2/MNN22/KTR2/MNN24/MNN15/STT3	9	6	3637784/3646425/3643674/3638789/3644794/3635743	3	3644405/3641117/3645443
BP	GO:0043413	macromolecule glycosylation	9/396	29/1861	0.143894	0.999999	3637784/3646425/3644405/3643674/3641117/3645443/3638789/3644794/3635743	MNN1/KTR4/MNN2/DIE2/MNN22/KTR2/MNN24/MNN15/STT3	9	6	3637784/3646425/3643674/3638789/3644794/3635743	3	3644405/3641117/3645443
BP	GO:0070085	glycosylation	9/396	30/1861	0.169121	0.999999	3637784/3646425/3644405/3643674/3641117/3645443/3638789/3644794/3635743	MNN1/KTR4/MNN2/DIE2/MNN22/KTR2/MNN24/MNN15/STT3	9	6	3637784/3646425/3643674/3638789/3644794/3635743	3	3644405/3641117/3645443
BP	GO:0044283	small molecule biosynthetic process	13/396	47/1861	0.181664	0.999999	3644012/3638966/3639701/3643784/3639339/3638346/3635826/3639691/3645025/3647777/3639688/3643808/3639519	ILV5/INO1/PCK1/IPK2/LEU4/PHA2/HOM2/ARG1/HIS4/HIS3/ACC1/LEU42/GLT1	13	3	3643784/3639688/3639519	10	3644012/3638966/3639701/3639339/3638346/3635826/3639691/3645025/3647777/3643808
BP	GO:0055085	transmembrane transport	59/396	250/1861	0.18851	0.999999	3642307/3642634/3640956/3639260/3647697/3638048/3642303/3646404/3635265/3639028/3642793/3640175/3639870/3634898/3641625/3643318/3635863/3645969/3642635/3642288/3646284/3646562/3636968/3640266/3637827/3638948/3647066/3640244/3639894/3647141/3635752/3640941/3639728/3647791/3643440/3643787/3644698/3645017/3640952/3636420/3641617/3643335/3647466/3645420/3640768/3638944/3637382/3646239/3646070/3639546…	SIT1/GIT3/TPO4/MDR1/OPT4/HGT12/YVC1/HGT9/CDR2/CAALFM_CR09920WA/CAALFM_C406440CA/CCH1/CAALFM_C106000WA/CAALFM_C109220WA/CAALFM_C601870CA/FTR1/HGT20/NAG3/GIT4/HST6/ATM1/GIT1/TOM40/OPT8/TNA1/CAALFM_CR10800CA/CAN3/CAALFM_C603540WA/UGA4/NHX1/CAALFM_C202180WA/QDR1/CAALFM_CR00420WA/TPO5/ITR1/YEA4/POR1/MNR2/CAALFM_CR04620CA/MAL31/CAALFM_C601520WA/DUR7/CAALFM_C307850WA/HGT1/OPT5/CAALFM_CR10770WA/SSY1/CAAL…	59	32	3642634/3640956/3647697/3642303/3646404/3635265/3639028/3642793/3640175/3639870/3634898/3635863/3642635/3642288/3646562/3639894/3635752/3639728/3647791/3643440/3643787/3644698/3640952/3645420/3640768/3646239/3639546/3643822/3647441/3636202/3639861/3638857	27	3642307/3639260/3638048/3641625/3643318/3645969/3646284/3636968/3640266/3637827/3638948/3647066/3640244/3647141/3640941/3645017/3636420/3641617/3643335/3647466/3638944/3637382/3646070/3639344/3645216/3646621/3640093
BP	GO:0008610	lipid biosynthetic process	9/396	31/1861	0.196251	0.999999	3638966/3644557/3641607/3645575/3635716/3645440/3636655/3639688/3639181	INO1/CHO1/CAALFM_C601370WA/GWT1/ERG251/ERG20/ERG6/ACC1/CAALFM_C603240WA	9	5	3644557/3645575/3635716/3645440/3639688	4	3638966/3641607/3636655/3639181
BP	GO:0030001	metal ion transport	8/396	28/1861	0.230149	0.999999	3643318/3641209/3635752/3645017/3639546/3647441/3639861/3637821	FTR1/CAALFM_C210720CA/CAALFM_C202180WA/MNR2/HAK1/MID1/PHO87/CCC2	8	5	3641209/3635752/3639546/3647441/3639861	3	3643318/3645017/3637821
BP	GO:0070647	protein modification by small protein conjugation or removal	5/396	16/1861	0.240887	0.999999	3647903/3635769/3635164/3639317/3646158	CAALFM_C600170CA/CAALFM_C202020WA/CAALFM_C304970CA/UBP6/CAALFM_C405250WA	5	1	3646158	4	3647903/3635769/3635164/3639317
BP	GO:0043933	protein-containing complex subunit organization	8/396	29/1861	0.263008	0.999999	30515358/3642478/3638917/3641648/3642502/30515038/3646043/3638433	HHO1/CAALFM_C105400CA/CAALFM_CR10180WA/ANB1/CAALFM_CR05970CA/PET100/ARC15/ECM29	8	3	30515358/3638917/3646043	5	3642478/3641648/3642502/30515038/3638433
BP	GO:0034645	cellular macromolecule biosynthetic process	96/396	427/1861	0.264649	0.999999	3638890/3637784/3640275/3641635/30515338/3647558/3641607/3646039/30515335/3645956/3635261/3647664/3642989/3646425/3641740/3645575/3639378/3640990/3635819/3636850/3638534/3642478/3639254/30515328/3640285/3644534/3644405/3645137/3641648/3638991/3642934/3640224/3647719/3636659/3636841/30515208/3639724/3647063/3648000/3635257/3639245/3641370/3637400/3643511/3643674/3636918/3640242/3643347/3640208/364…	RFC5/MNN1/NAM2/ZCF18/RPL25/RPL23A/CAALFM_C601370WA/MRPL8/RPL32/ILS1/TEC1/BRG1/RNR1/KTR4/ZCF35/GWT1/RPO41/CAALFM_CR04250WA/CAALFM_C202530WA/RPL10/ZFU2/CAALFM_C105400CA/POL5/RPS13/ALA1/CAALFM_C601920CA/MNN2/CAALFM_CR03400WA/ANB1/RPO21/UBI3/MRP20/RPL3/RPL12/RPL13/RPS19A/MRPL6/CAALFM_C501550CA/ECM22/RPL19A/CAALFM_C602790CA/ZCF29/RPL21A/AFT2/DIE2/MED17/RPS21/RPL4B/STB5/CAALFM_C603730CA/MSM1/YST1/CAALF…	96	18	3638890/3637784/3635261/3647664/3646425/3641740/3645575/3648000/3643674/3637740/3642915/3635666/3636610/3634867/3638789/3644794/3644103/3635743	78	3640275/3641635/30515338/3647558/3641607/3646039/30515335/3645956/3642989/3639378/3640990/3635819/3636850/3638534/3642478/3639254/30515328/3640285/3644534/3644405/3645137/3641648/3638991/3642934/3640224/3647719/3636659/3636841/30515208/3639724/3647063/3635257/3639245/3641370/3637400/3643511/3636918/3640242/3643347/3640208/3640303/3636398/3643678/3638020/3646988/3643754/3639551/3647675/3641886/363…
BP	GO:0019725	cellular homeostasis	5/396	17/1861	0.285981	0.999999	3646660/3639313/3641367/3640185/3647441	CAALFM_C107630WA/TTR1/PDI1/CAALFM_C101300WA/MID1	5	1	3647441	4	3646660/3639313/3641367/3640185
BP	GO:0009059	macromolecule biosynthetic process	96/396	430/1861	0.293761	0.999999	3638890/3637784/3640275/3641635/30515338/3647558/3641607/3646039/30515335/3645956/3635261/3647664/3642989/3646425/3641740/3645575/3639378/3640990/3635819/3636850/3638534/3642478/3639254/30515328/3640285/3644534/3644405/3645137/3641648/3638991/3642934/3640224/3647719/3636659/3636841/30515208/3639724/3647063/3648000/3635257/3639245/3641370/3637400/3643511/3643674/3636918/3640242/3643347/3640208/364…	RFC5/MNN1/NAM2/ZCF18/RPL25/RPL23A/CAALFM_C601370WA/MRPL8/RPL32/ILS1/TEC1/BRG1/RNR1/KTR4/ZCF35/GWT1/RPO41/CAALFM_CR04250WA/CAALFM_C202530WA/RPL10/ZFU2/CAALFM_C105400CA/POL5/RPS13/ALA1/CAALFM_C601920CA/MNN2/CAALFM_CR03400WA/ANB1/RPO21/UBI3/MRP20/RPL3/RPL12/RPL13/RPS19A/MRPL6/CAALFM_C501550CA/ECM22/RPL19A/CAALFM_C602790CA/ZCF29/RPL21A/AFT2/DIE2/MED17/RPS21/RPL4B/STB5/CAALFM_C603730CA/MSM1/YST1/CAALF…	96	18	3638890/3637784/3635261/3647664/3646425/3641740/3645575/3648000/3643674/3637740/3642915/3635666/3636610/3634867/3638789/3644794/3644103/3635743	78	3640275/3641635/30515338/3647558/3641607/3646039/30515335/3645956/3642989/3639378/3640990/3635819/3636850/3638534/3642478/3639254/30515328/3640285/3644534/3644405/3645137/3641648/3638991/3642934/3640224/3647719/3636659/3636841/30515208/3639724/3647063/3635257/3639245/3641370/3637400/3643511/3636918/3640242/3643347/3640208/3640303/3636398/3643678/3638020/3646988/3643754/3639551/3647675/3641886/363…
BP	GO:0034622	cellular protein-containing complex assembly	6/396	22/1861	0.319787	0.999999	30515358/3638917/3642502/30515038/3646043/3638433	HHO1/CAALFM_CR10180WA/CAALFM_CR05970CA/PET100/ARC15/ECM29	6	3	30515358/3638917/3646043	3	3642502/30515038/3638433
BP	GO:0035556	intracellular signal transduction	8/396	31/1861	0.332244	0.999999	3637434/3636184/3644458/3641358/3646953/3643298/3635220/3637394	ROM2/SSK1/YPD1/NIK1/TSC2/GDI1/SEC7/CHK1	8	2	3646953/3635220	6	3637434/3636184/3644458/3641358/3643298/3637394
BP	GO:0007264	small GTPase mediated signal transduction	4/396	14/1861	0.346175	0.999999	3637434/3646953/3643298/3635220	ROM2/TSC2/GDI1/SEC7	4	2	3646953/3635220	2	3637434/3643298
BP	GO:0046488	phosphatidylinositol metabolic process	4/396	14/1861	0.346175	0.999999	3641607/3645575/3644045/3647957	CAALFM_C601370WA/GWT1/HAL21/MSS4	4	2	3645575/3647957	2	3641607/3644045
BP	GO:0006605	protein targeting	3/396	10/1861	0.360998	0.999999	3636513/3641898/3636817	SRP101/PHO88/TOM20	3	0		3	3636513/3641898/3636817
BP	GO:0009966	regulation of signal transduction	3/396	10/1861	0.360998	0.999999	3637434/3646953/3635220	ROM2/TSC2/SEC7	3	2	3646953/3635220	1	3637434
BP	GO:0010646	regulation of cell communication	3/396	10/1861	0.360998	0.999999	3637434/3646953/3635220	ROM2/TSC2/SEC7	3	2	3646953/3635220	1	3637434
BP	GO:0023051	regulation of signaling	3/396	10/1861	0.360998	0.999999	3637434/3646953/3635220	ROM2/TSC2/SEC7	3	2	3646953/3635220	1	3637434
BP	GO:0048285	organelle fission	3/396	10/1861	0.360998	0.999999	3646288/3645874/3638037	PEX11/CAALFM_C602300CA/DCC1	3	1	3638037	2	3646288/3645874
BP	GO:0048583	regulation of response to stimulus	3/396	10/1861	0.360998	0.999999	3637434/3646953/3635220	ROM2/TSC2/SEC7	3	2	3646953/3635220	1	3637434
BP	GO:0006650	glycerophospholipid metabolic process	4/396	15/1861	0.400067	0.999999	3641607/3645575/3644045/3647957	CAALFM_C601370WA/GWT1/HAL21/MSS4	4	2	3645575/3647957	2	3641607/3644045
BP	GO:0046486	glycerolipid metabolic process	4/396	15/1861	0.400067	0.999999	3641607/3645575/3644045/3647957	CAALFM_C601370WA/GWT1/HAL21/MSS4	4	2	3645575/3647957	2	3641607/3644045
BP	GO:0065003	protein-containing complex assembly	6/396	24/1861	0.404221	0.999999	30515358/3638917/3642502/30515038/3646043/3638433	HHO1/CAALFM_CR10180WA/CAALFM_CR05970CA/PET100/ARC15/ECM29	6	3	30515358/3638917/3646043	3	3642502/30515038/3638433
BP	GO:0043038	amino acid activation	8/396	34/1861	0.440003	0.999999	3640275/3645124/3636824/3645956/3640285/3645137/3636398/3646086	NAM2/CAALFM_CR03110WA/FRS2/ILS1/ALA1/CAALFM_CR03400WA/MSM1/CAALFM_C600390WA	8	1	3636824	7	3640275/3645124/3645956/3640285/3645137/3636398/3646086
BP	GO:0043039	tRNA aminoacylation	8/396	34/1861	0.440003	0.999999	3640275/3645124/3636824/3645956/3640285/3645137/3636398/3646086	NAM2/CAALFM_CR03110WA/FRS2/ILS1/ALA1/CAALFM_CR03400WA/MSM1/CAALFM_C600390WA	8	1	3636824	7	3640275/3645124/3645956/3640285/3645137/3636398/3646086
BP	GO:0006508	proteolysis	17/396	76/1861	0.452685	0.999999	3638884/3646074/3636589/3643295/3647903/3640999/3635769/3645040/3635164/3636500/3641012/3639558/3645874/3642244/3639317/3636957/30515395	CAALFM_C200700WA/CAALFM_C600340CA/AFG3/DDI1/CAALFM_C600170CA/PIM1/CAALFM_C202020WA/STE24/CAALFM_C304970CA/PRE1/LAP3/CAALFM_C106390WA/CAALFM_C602300CA/CYM1/UBP6/PRE10/PRE6	17	1	3641012	16	3638884/3646074/3636589/3643295/3647903/3640999/3635769/3645040/3635164/3636500/3639558/3645874/3642244/3639317/3636957/30515395
BP	GO:0045454	cell redox homeostasis	4/396	16/1861	0.453127	0.999999	3646660/3639313/3641367/3640185	CAALFM_C107630WA/TTR1/PDI1/CAALFM_C101300WA	4	0		4	3646660/3639313/3641367/3640185
BP	GO:0046434	organophosphate catabolic process	4/396	16/1861	0.453127	0.999999	3644563/3644562/3647039/3647089	GPD2/PLB2/SPO1/PLB3	4	2	3647039/3647089	2	3644563/3644562
BP	GO:0051128	regulation of cellular component organization	3/396	12/1861	0.486851	0.999999	3641648/3645874/3646043	ANB1/CAALFM_C602300CA/ARC15	3	1	3646043	2	3641648/3645874
BP	GO:0006281	DNA repair	10/396	45/1861	0.497476	0.999999	3642966/3641632/3645324/3638917/3645374/3637340/3646519/3643106/3639681/3643294	CAALFM_C407010CA/FPG1/CAS1/CAALFM_CR10180WA/RAD2/RAD32/CAALFM_C406020CA/OGG1/MMS22/MLH3	10	2	3645324/3638917	8	3642966/3641632/3645374/3637340/3646519/3643106/3639681/3643294
BP	GO:0006511	ubiquitin-dependent protein catabolic process	5/396	22/1861	0.517689	0.999999	3635164/3639558/3645874/3636957/30515395	CAALFM_C304970CA/CAALFM_C106390WA/CAALFM_C602300CA/PRE10/PRE6	5	0		5	3635164/3639558/3645874/3636957/30515395
BP	GO:0019941	modification-dependent protein catabolic process	5/396	22/1861	0.517689	0.999999	3635164/3639558/3645874/3636957/30515395	CAALFM_C304970CA/CAALFM_C106390WA/CAALFM_C602300CA/PRE10/PRE6	5	0		5	3635164/3639558/3645874/3636957/30515395
BP	GO:0043632	modification-dependent macromolecule catabolic process	5/396	22/1861	0.517689	0.999999	3635164/3639558/3645874/3636957/30515395	CAALFM_C304970CA/CAALFM_C106390WA/CAALFM_C602300CA/PRE10/PRE6	5	0		5	3635164/3639558/3645874/3636957/30515395
BP	GO:0000278	mitotic cell cycle	3/396	13/1861	0.54518	0.999999	3643783/3645874/3638037	MTW1/CAALFM_C602300CA/DCC1	3	2	3643783/3638037	1	3645874
BP	GO:0007005	mitochondrion organization	3/396	13/1861	0.54518	0.999999	3642502/3636834/30515038	CAALFM_CR05970CA/CAALFM_C102960CA/PET100	3	1	3636834	2	3642502/30515038
BP	GO:0016579	protein deubiquitination	3/396	13/1861	0.54518	0.999999	3647903/3635769/3639317	CAALFM_C600170CA/CAALFM_C202020WA/UBP6	3	0		3	3647903/3635769/3639317
BP	GO:0070646	protein modification by small protein removal	3/396	13/1861	0.54518	0.999999	3647903/3635769/3639317	CAALFM_C600170CA/CAALFM_C202020WA/UBP6	3	0		3	3647903/3635769/3639317
BP	GO:0005975	carbohydrate metabolic process	17/396	80/1861	0.548432	0.999999	3638966/3639667/3642618/3639701/3636421/3636797/3644563/3645964/3639703/3639716/3647194/3638967/3635691/3644583/3636523/3637905/3645966	INO1/MDH1/CAALFM_C501230CA/PCK1/CAALFM_C504940WA/SCW4/GPD2/HXK1/NGS1/CDA2/GCA2/CHT3/BGL2/GAL10/CHT2/CRH11/NAG1	17	7	3642618/3636421/3636797/3639716/3638967/3644583/3637905	10	3638966/3639667/3639701/3644563/3645964/3639703/3647194/3635691/3636523/3645966
BP	GO:0008654	phospholipid biosynthetic process	4/396	18/1861	0.553731	0.999999	3638966/3644557/3641607/3645575	INO1/CHO1/CAALFM_C601370WA/GWT1	4	2	3644557/3645575	2	3638966/3641607
BP	GO:0042592	homeostatic process	5/396	23/1861	0.560974	0.999999	3646660/3639313/3641367/3640185/3647441	CAALFM_C107630WA/TTR1/PDI1/CAALFM_C101300WA/MID1	5	1	3647441	4	3646660/3639313/3641367/3640185
BP	GO:0044271	cellular nitrogen compound biosynthetic process	86/396	408/1861	0.568763	0.999999	3640275/3641635/30515338/3647558/3646039/30515335/3645956/3635261/3647664/3647071/3641740/3639378/3640990/3635819/3636850/3638534/3642478/3639254/30515328/3640285/3644534/3645137/3641648/3638991/3642934/3640224/3647719/3644116/3636659/3636841/30515208/3639724/3647063/3648000/3635257/3639245/3641370/3637400/3643511/3636918/3640242/3643347/3641233/3640208/3640303/3636398/3643678/3638020/3646988/364…	NAM2/ZCF18/RPL25/RPL23A/MRPL8/RPL32/ILS1/TEC1/BRG1/COX15/ZCF35/RPO41/CAALFM_CR04250WA/CAALFM_C202530WA/RPL10/ZFU2/CAALFM_C105400CA/POL5/RPS13/ALA1/CAALFM_C601920CA/CAALFM_CR03400WA/ANB1/RPO21/UBI3/MRP20/RPL3/SPE2/RPL12/RPL13/RPS19A/MRPL6/CAALFM_C501550CA/ECM22/RPL19A/CAALFM_C602790CA/ZCF29/RPL21A/AFT2/MED17/RPS21/RPL4B/CAALFM_C210860CA/STB5/CAALFM_C603730CA/MSM1/YST1/CAALFM_C701020CA/FGR27/ZNC1/R…	86	11	3635261/3647664/3641740/3644116/3648000/3637740/3642915/3635666/3636610/3634867/3644103	75	3640275/3641635/30515338/3647558/3646039/30515335/3645956/3647071/3639378/3640990/3635819/3636850/3638534/3642478/3639254/30515328/3640285/3644534/3645137/3641648/3638991/3642934/3640224/3647719/3636659/3636841/30515208/3639724/3647063/3635257/3639245/3641370/3637400/3643511/3636918/3640242/3643347/3641233/3640208/3640303/3636398/3643678/3638020/3646988/3643754/3639551/3647675/3645211/3641886/363…
BP	GO:0051179	localization	82/396	390/1861	0.57908	0.999999	3642307/3642634/3640956/3639260/3647697/3638048/3642791/3642303/3646404/3635265/3639028/3642793/3640175/3639870/3634898/3641625/3641631/3643318/3635863/3645969/3637401/3636793/3642635/3639212/3642288/3646284/3646562/3645870/3636513/3636968/3640266/3637827/3638948/3647066/3640244/3639894/3647141/3638892/3638440/3641209/3647650/3635752/3641183/3640941/3641898/3639728/3647791/3643440/3645976/3643787…	SIT1/GIT3/TPO4/MDR1/OPT4/HGT12/CAALFM_C406460CA/YVC1/HGT9/CDR2/CAALFM_CR09920WA/CAALFM_C406440CA/CCH1/CAALFM_C106000WA/CAALFM_C109220WA/CAALFM_C601870CA/CTA1/FTR1/HGT20/NAG3/CAALFM_C203800CA/CAALFM_C102410CA/GIT4/CAALFM_C602720CA/HST6/ATM1/GIT1/SEC27/SRP101/TOM40/OPT8/TNA1/CAALFM_CR10800CA/CAN3/CAALFM_C603540WA/UGA4/NHX1/VPS24/CAALFM_C307130WA/CAALFM_C210720CA/TOM22/CAALFM_C202180WA/CAALFM_C40418…	82	41	3642634/3640956/3647697/3642791/3642303/3646404/3635265/3639028/3642793/3640175/3639870/3634898/3635863/3637401/3636793/3642635/3639212/3642288/3646562/3639894/3638892/3641209/3635752/3639728/3647791/3643440/3643787/3644584/3644698/3636834/3640952/3645420/3640768/3646239/3639546/3643822/3645567/3647441/3636202/3639861/3638857	41	3642307/3639260/3638048/3641625/3641631/3643318/3645969/3646284/3645870/3636513/3636968/3640266/3637827/3638948/3647066/3640244/3647141/3638440/3647650/3641183/3640941/3641898/3645976/3636817/3647078/3645017/3636420/3647897/3641617/3643335/3647466/3638944/3637382/3646070/3639344/3639377/3645216/3646621/3640093/3645022/3637821
BP	GO:0006810	transport	80/396	381/1861	0.584377	0.999999	3642307/3642634/3640956/3639260/3647697/3638048/3642791/3642303/3646404/3635265/3639028/3642793/3640175/3639870/3634898/3641625/3641631/3643318/3635863/3645969/3637401/3636793/3642635/3639212/3642288/3646284/3646562/3645870/3636513/3636968/3640266/3637827/3638948/3647066/3640244/3639894/3647141/3638892/3638440/3641209/3647650/3635752/3640941/3641898/3639728/3647791/3643440/3645976/3643787/3644584…	SIT1/GIT3/TPO4/MDR1/OPT4/HGT12/CAALFM_C406460CA/YVC1/HGT9/CDR2/CAALFM_CR09920WA/CAALFM_C406440CA/CCH1/CAALFM_C106000WA/CAALFM_C109220WA/CAALFM_C601870CA/CTA1/FTR1/HGT20/NAG3/CAALFM_C203800CA/CAALFM_C102410CA/GIT4/CAALFM_C602720CA/HST6/ATM1/GIT1/SEC27/SRP101/TOM40/OPT8/TNA1/CAALFM_CR10800CA/CAN3/CAALFM_C603540WA/UGA4/NHX1/VPS24/CAALFM_C307130WA/CAALFM_C210720CA/TOM22/CAALFM_C202180WA/QDR1/PHO88/CA…	80	40	3642634/3640956/3647697/3642791/3642303/3646404/3635265/3639028/3642793/3640175/3639870/3634898/3635863/3637401/3636793/3642635/3639212/3642288/3646562/3639894/3638892/3641209/3635752/3639728/3647791/3643440/3643787/3644584/3644698/3640952/3645420/3640768/3646239/3639546/3643822/3645567/3647441/3636202/3639861/3638857	40	3642307/3639260/3638048/3641625/3641631/3643318/3645969/3646284/3645870/3636513/3636968/3640266/3637827/3638948/3647066/3640244/3647141/3638440/3647650/3640941/3641898/3645976/3636817/3647078/3645017/3636420/3647897/3641617/3643335/3647466/3638944/3637382/3646070/3639344/3639377/3645216/3646621/3640093/3645022/3637821
BP	GO:0033554	cellular response to stress	11/396	53/1861	0.592976	0.999999	3642966/3641632/3645324/3638917/3645374/3637340/3643511/3646519/3643106/3639681/3643294	CAALFM_C407010CA/FPG1/CAS1/CAALFM_CR10180WA/RAD2/RAD32/AFT2/CAALFM_C406020CA/OGG1/MMS22/MLH3	11	2	3645324/3638917	9	3642966/3641632/3645374/3637340/3643511/3646519/3643106/3639681/3643294
BP	GO:0098813	nuclear chromosome segregation	3/396	14/1861	0.599454	0.999999	3635656/3645874/3638037	ASK1/CAALFM_C602300CA/DCC1	3	2	3635656/3638037	1	3645874
BP	GO:0044257	cellular protein catabolic process	6/396	29/1861	0.604855	0.999999	3635164/3636500/3639558/3645874/3636957/30515395	CAALFM_C304970CA/PRE1/CAALFM_C106390WA/CAALFM_C602300CA/PRE10/PRE6	6	0		6	3635164/3636500/3639558/3645874/3636957/30515395
BP	GO:0051603	proteolysis involved in cellular protein catabolic process	6/396	29/1861	0.604855	0.999999	3635164/3636500/3639558/3645874/3636957/30515395	CAALFM_C304970CA/PRE1/CAALFM_C106390WA/CAALFM_C602300CA/PRE10/PRE6	6	0		6	3635164/3636500/3639558/3645874/3636957/30515395
BP	GO:0051234	establishment of localization	80/396	383/1861	0.607404	0.999999	3642307/3642634/3640956/3639260/3647697/3638048/3642791/3642303/3646404/3635265/3639028/3642793/3640175/3639870/3634898/3641625/3641631/3643318/3635863/3645969/3637401/3636793/3642635/3639212/3642288/3646284/3646562/3645870/3636513/3636968/3640266/3637827/3638948/3647066/3640244/3639894/3647141/3638892/3638440/3641209/3647650/3635752/3640941/3641898/3639728/3647791/3643440/3645976/3643787/3644584…	SIT1/GIT3/TPO4/MDR1/OPT4/HGT12/CAALFM_C406460CA/YVC1/HGT9/CDR2/CAALFM_CR09920WA/CAALFM_C406440CA/CCH1/CAALFM_C106000WA/CAALFM_C109220WA/CAALFM_C601870CA/CTA1/FTR1/HGT20/NAG3/CAALFM_C203800CA/CAALFM_C102410CA/GIT4/CAALFM_C602720CA/HST6/ATM1/GIT1/SEC27/SRP101/TOM40/OPT8/TNA1/CAALFM_CR10800CA/CAN3/CAALFM_C603540WA/UGA4/NHX1/VPS24/CAALFM_C307130WA/CAALFM_C210720CA/TOM22/CAALFM_C202180WA/QDR1/PHO88/CA…	80	40	3642634/3640956/3647697/3642791/3642303/3646404/3635265/3639028/3642793/3640175/3639870/3634898/3635863/3637401/3636793/3642635/3639212/3642288/3646562/3639894/3638892/3641209/3635752/3639728/3647791/3643440/3643787/3644584/3644698/3640952/3645420/3640768/3646239/3639546/3643822/3645567/3647441/3636202/3639861/3638857	40	3642307/3639260/3638048/3641625/3641631/3643318/3645969/3646284/3645870/3636513/3636968/3640266/3637827/3638948/3647066/3640244/3647141/3638440/3647650/3640941/3641898/3645976/3636817/3647078/3645017/3636420/3647897/3641617/3643335/3647466/3638944/3637382/3646070/3639344/3639377/3645216/3646621/3640093/3645022/3637821
BP	GO:0065008	regulation of biological quality	7/396	34/1861	0.607777	0.999999	3641183/3646660/3639313/3641367/3646043/3640185/3647441	CAALFM_C404180CA/CAALFM_C107630WA/TTR1/PDI1/ARC15/CAALFM_C101300WA/MID1	7	2	3646043/3647441	5	3641183/3646660/3639313/3641367/3640185
BP	GO:0022607	cellular component assembly	6/396	30/1861	0.640484	0.999999	30515358/3638917/3642502/30515038/3646043/3638433	HHO1/CAALFM_CR10180WA/CAALFM_CR05970CA/PET100/ARC15/ECM29	6	3	30515358/3638917/3646043	3	3642502/30515038/3638433
BP	GO:0030163	protein catabolic process	6/396	30/1861	0.640484	0.999999	3635164/3636500/3639558/3645874/3636957/30515395	CAALFM_C304970CA/PRE1/CAALFM_C106390WA/CAALFM_C602300CA/PRE10/PRE6	6	0		6	3635164/3636500/3639558/3645874/3636957/30515395
BP	GO:0006974	cellular response to DNA damage stimulus	10/396	50/1861	0.644717	0.999999	3642966/3641632/3645324/3638917/3645374/3637340/3646519/3643106/3639681/3643294	CAALFM_C407010CA/FPG1/CAS1/CAALFM_CR10180WA/RAD2/RAD32/CAALFM_C406020CA/OGG1/MMS22/MLH3	10	2	3645324/3638917	8	3642966/3641632/3645374/3637340/3646519/3643106/3639681/3643294
BP	GO:0006950	response to stress	12/396	60/1861	0.648512	0.999999	3642966/3641632/3644010/3645324/3638917/3645374/3637340/3643511/3646519/3643106/3639681/3643294	CAALFM_C407010CA/FPG1/CAALFM_C600850WA/CAS1/CAALFM_CR10180WA/RAD2/RAD32/AFT2/CAALFM_C406020CA/OGG1/MMS22/MLH3	12	2	3645324/3638917	10	3642966/3641632/3644010/3645374/3637340/3643511/3646519/3643106/3639681/3643294
BP	GO:0006457	protein folding	3/396	15/1861	0.649301	0.999999	3640133/3641623/3641554	MGE1/CAALFM_C601460CA/CAALFM_C500350CA	3	0		3	3640133/3641623/3641554
BP	GO:0022402	cell cycle process	3/396	15/1861	0.649301	0.999999	3635656/3645874/3638037	ASK1/CAALFM_C602300CA/DCC1	3	2	3635656/3638037	1	3645874
BP	GO:0050896	response to stimulus	23/396	114/1861	0.65479	0.999999	3642966/3641632/3644010/3645324/3638917/3637052/3645374/3637434/3637340/3636184/3644458/3643511/3641358/3646953/3643298/3646519/3635220/3646239/3643106/3639344/3639681/3643294/3637394	CAALFM_C407010CA/FPG1/CAALFM_C600850WA/CAS1/CAALFM_CR10180WA/IQG1/RAD2/ROM2/RAD32/SSK1/YPD1/AFT2/NIK1/TSC2/GDI1/CAALFM_C406020CA/SEC7/CAALFM_C703590CA/OGG1/CAALFM_C100830WA/MMS22/MLH3/CHK1	23	6	3645324/3638917/3637052/3646953/3635220/3646239	17	3642966/3641632/3644010/3645374/3637434/3637340/3636184/3644458/3643511/3641358/3643298/3646519/3643106/3639344/3639681/3643294/3637394
BP	GO:0006497	protein lipidation	2/396	10/1861	0.662262	0.999999	3641607/3645575	CAALFM_C601370WA/GWT1	2	1	3645575	1	3641607
BP	GO:0006505	GPI anchor metabolic process	2/396	10/1861	0.662262	0.999999	3641607/3645575	CAALFM_C601370WA/GWT1	2	1	3645575	1	3641607
BP	GO:0006506	GPI anchor biosynthetic process	2/396	10/1861	0.662262	0.999999	3641607/3645575	CAALFM_C601370WA/GWT1	2	1	3645575	1	3641607
BP	GO:0006661	phosphatidylinositol biosynthetic process	2/396	10/1861	0.662262	0.999999	3641607/3645575	CAALFM_C601370WA/GWT1	2	1	3645575	1	3641607
BP	GO:0006664	glycolipid metabolic process	2/396	10/1861	0.662262	0.999999	3641607/3645575	CAALFM_C601370WA/GWT1	2	1	3645575	1	3641607
BP	GO:0009247	glycolipid biosynthetic process	2/396	10/1861	0.662262	0.999999	3641607/3645575	CAALFM_C601370WA/GWT1	2	1	3645575	1	3641607
BP	GO:0042157	lipoprotein metabolic process	2/396	10/1861	0.662262	0.999999	3641607/3645575	CAALFM_C601370WA/GWT1	2	1	3645575	1	3641607
BP	GO:0042158	lipoprotein biosynthetic process	2/396	10/1861	0.662262	0.999999	3641607/3645575	CAALFM_C601370WA/GWT1	2	1	3645575	1	3641607
BP	GO:0046467	membrane lipid biosynthetic process	2/396	10/1861	0.662262	0.999999	3641607/3645575	CAALFM_C601370WA/GWT1	2	1	3645575	1	3641607
BP	GO:0051640	organelle localization	2/396	10/1861	0.662262	0.999999	3647078/3636834	SEC8/CAALFM_C102960CA	2	1	3636834	1	3647078
BP	GO:1903047	mitotic cell cycle process	2/396	10/1861	0.662262	0.999999	3645874/3638037	CAALFM_C602300CA/DCC1	2	1	3638037	1	3645874
BP	GO:1903509	liposaccharide metabolic process	2/396	10/1861	0.662262	0.999999	3641607/3645575	CAALFM_C601370WA/GWT1	2	1	3645575	1	3641607
BP	GO:0007154	cell communication	10/396	51/1861	0.671219	0.999999	3637052/3637434/3636184/3644458/3643511/3641358/3646953/3643298/3635220/3637394	IQG1/ROM2/SSK1/YPD1/AFT2/NIK1/TSC2/GDI1/SEC7/CHK1	10	3	3637052/3646953/3635220	7	3637434/3636184/3644458/3643511/3641358/3643298/3637394
BP	GO:0006418	tRNA aminoacylation for protein translation	6/396	31/1861	0.674132	0.999999	3640275/3645956/3640285/3645137/3636398/3646086	NAM2/ILS1/ALA1/CAALFM_CR03400WA/MSM1/CAALFM_C600390WA	6	0		6	3640275/3645956/3640285/3645137/3636398/3646086
BP	GO:0007059	chromosome segregation	3/396	16/1861	0.694571	0.999999	3635656/3645874/3638037	ASK1/CAALFM_C602300CA/DCC1	3	2	3635656/3638037	1	3645874
BP	GO:0048193	Golgi vesicle transport	3/396	16/1861	0.694571	0.999999	3642791/3637401/3636793	CAALFM_C406460CA/CAALFM_C203800CA/CAALFM_C102410CA	3	3	3642791/3637401/3636793	0
BP	GO:0010467	gene expression	89/396	434/1861	0.695176	0.999999	3647604/3640275/3641635/30515338/3647558/3646039/30515335/3645956/3635261/3647664/3635700/3641740/3639378/3640990/3635819/3636850/3638534/3642478/3639254/30515328/3640285/3644534/3645137/3641648/3638991/3642934/3640224/3647719/3636659/3636841/30515208/3640722/3639724/3647063/3648000/3635257/3639245/3641370/3643778/3637400/3643511/3636918/3640242/3643347/3640208/3640303/3636398/3643678/3638020/364…	CAALFM_C112570CA/NAM2/ZCF18/RPL25/RPL23A/MRPL8/RPL32/ILS1/TEC1/BRG1/CAALFM_C401280CA/ZCF35/RPO41/CAALFM_CR04250WA/CAALFM_C202530WA/RPL10/ZFU2/CAALFM_C105400CA/POL5/RPS13/ALA1/CAALFM_C601920CA/CAALFM_CR03400WA/ANB1/RPO21/UBI3/MRP20/RPL3/RPL12/RPL13/RPS19A/MRPL3/MRPL6/CAALFM_C501550CA/ECM22/RPL19A/CAALFM_C602790CA/ZCF29/SMM1/RPL21A/AFT2/MED17/RPS21/RPL4B/STB5/CAALFM_C603730CA/MSM1/YST1/CAALFM_C7010…	89	16	3647604/3635261/3647664/3635700/3641740/3648000/3643778/3637740/3643518/3642915/3635666/3636610/3634867/3644103/3646411/3637975	73	3640275/3641635/30515338/3647558/3646039/30515335/3645956/3639378/3640990/3635819/3636850/3638534/3642478/3639254/30515328/3640285/3644534/3645137/3641648/3638991/3642934/3640224/3647719/3636659/3636841/30515208/3640722/3639724/3647063/3635257/3639245/3641370/3637400/3643511/3636918/3640242/3643347/3640208/3640303/3636398/3643678/3638020/3646988/3643754/3639551/3647675/3641886/3637057/3639723/305…
BP	GO:1901575	organic substance catabolic process	14/396	72/1861	0.696847	0.999999	3634797/3634854/3645987/3644563/3644562/3635164/3636500/3639558/3645874/3647039/3647089/3636598/3636957/30515395	LIP3/LIP2/LIP4/GPD2/PLB2/CAALFM_C304970CA/PRE1/CAALFM_C106390WA/CAALFM_C602300CA/SPO1/PLB3/POX1-3/PRE10/PRE6	14	5	3634797/3634854/3647039/3647089/3636598	9	3645987/3644563/3644562/3635164/3636500/3639558/3645874/3636957/30515395
BP	GO:0006643	membrane lipid metabolic process	2/396	11/1861	0.714959	0.999999	3641607/3645575	CAALFM_C601370WA/GWT1	2	1	3645575	1	3641607
BP	GO:0016051	carbohydrate biosynthetic process	2/396	11/1861	0.714959	0.999999	3638966/3639701	INO1/PCK1	2	0		2	3638966/3639701
BP	GO:0033043	regulation of organelle organization	2/396	11/1861	0.714959	0.999999	3645874/3646043	CAALFM_C602300CA/ARC15	2	1	3646043	1	3645874
BP	GO:0045017	glycerolipid biosynthetic process	2/396	11/1861	0.714959	0.999999	3641607/3645575	CAALFM_C601370WA/GWT1	2	1	3645575	1	3641607
BP	GO:0046474	glycerophospholipid biosynthetic process	2/396	11/1861	0.714959	0.999999	3641607/3645575	CAALFM_C601370WA/GWT1	2	1	3645575	1	3641607
BP	GO:0051716	cellular response to stimulus	20/396	103/1861	0.720627	0.999999	3642966/3641632/3645324/3638917/3637052/3645374/3637434/3637340/3636184/3644458/3643511/3641358/3646953/3643298/3646519/3635220/3643106/3639681/3643294/3637394	CAALFM_C407010CA/FPG1/CAS1/CAALFM_CR10180WA/IQG1/RAD2/ROM2/RAD32/SSK1/YPD1/AFT2/NIK1/TSC2/GDI1/CAALFM_C406020CA/SEC7/OGG1/MMS22/MLH3/CHK1	20	5	3645324/3638917/3637052/3646953/3635220	15	3642966/3641632/3645374/3637434/3637340/3636184/3644458/3643511/3641358/3643298/3646519/3643106/3639681/3643294/3637394
BP	GO:0050790	regulation of catalytic activity	2/396	12/1861	0.760581	0.999999	3637052/3646953	IQG1/TSC2	2	2	3637052/3646953	0
BP	GO:0065009	regulation of molecular function	2/396	12/1861	0.760581	0.999999	3637052/3646953	IQG1/TSC2	2	2	3637052/3646953	0
BP	GO:0072594	establishment of protein localization to organelle	2/396	12/1861	0.760581	0.999999	3636513/3641898	SRP101/PHO88	2	0		2	3636513/3641898
BP	GO:0044265	cellular macromolecule catabolic process	6/396	34/1861	0.76243	0.999999	3635164/3636500/3639558/3645874/3636957/30515395	CAALFM_C304970CA/PRE1/CAALFM_C106390WA/CAALFM_C602300CA/PRE10/PRE6	6	0		6	3635164/3636500/3639558/3645874/3636957/30515395
BP	GO:0007165	signal transduction	9/396	50/1861	0.768734	0.999999	3637052/3637434/3636184/3644458/3641358/3646953/3643298/3635220/3637394	IQG1/ROM2/SSK1/YPD1/NIK1/TSC2/GDI1/SEC7/CHK1	9	3	3637052/3646953/3635220	6	3637434/3636184/3644458/3641358/3643298/3637394
BP	GO:0023052	signaling	9/396	50/1861	0.768734	0.999999	3637052/3637434/3636184/3644458/3641358/3646953/3643298/3635220/3637394	IQG1/ROM2/SSK1/YPD1/NIK1/TSC2/GDI1/SEC7/CHK1	9	3	3637052/3646953/3635220	6	3637434/3636184/3644458/3641358/3643298/3637394
BP	GO:0006399	tRNA metabolic process	11/396	61/1861	0.781634	0.999999	3647604/3640275/3645124/3636824/3645956/3640285/3645137/3643778/3636398/3646086/3646411	CAALFM_C112570CA/NAM2/CAALFM_CR03110WA/FRS2/ILS1/ALA1/CAALFM_CR03400WA/SMM1/MSM1/CAALFM_C600390WA/SEN15	11	4	3647604/3636824/3643778/3646411	7	3640275/3645124/3645956/3640285/3645137/3636398/3646086
BP	GO:0006812	cation transport	11/396	61/1861	0.781634	0.999999	3643318/3647141/3641209/3635752/3645017/3646070/3639546/3647441/3639861/3645022/3637821	FTR1/NHX1/CAALFM_C210720CA/CAALFM_C202180WA/MNR2/STV1/HAK1/MID1/PHO87/MEP2/CCC2	11	5	3641209/3635752/3639546/3647441/3639861	6	3643318/3647141/3645017/3646070/3645022/3637821
BP	GO:0006357	regulation of transcription by RNA polymerase II	4/396	24/1861	0.784822	0.999999	3639245/3643511/3636918/3644103	CAALFM_C602790CA/AFT2/MED17/MED18	4	1	3644103	3	3639245/3643511/3636918
BP	GO:0009057	macromolecule catabolic process	6/396	35/1861	0.787597	0.999999	3635164/3636500/3639558/3645874/3636957/30515395	CAALFM_C304970CA/PRE1/CAALFM_C106390WA/CAALFM_C602300CA/PRE10/PRE6	6	0		6	3635164/3636500/3639558/3645874/3636957/30515395
BP	GO:0006811	ion transport	14/396	77/1861	0.791612	0.999999	3642303/3640175/3643318/3647141/3641209/3635752/3645976/3645017/3646070/3639546/3647441/3639861/3645022/3637821	YVC1/CCH1/FTR1/NHX1/CAALFM_C210720CA/CAALFM_C202180WA/CAALFM_C604550CA/MNR2/STV1/HAK1/MID1/PHO87/MEP2/CCC2	14	7	3642303/3640175/3641209/3635752/3639546/3647441/3639861	7	3643318/3647141/3645976/3645017/3646070/3645022/3637821
BP	GO:0016311	dephosphorylation	2/396	13/1861	0.799744	0.999999	3638940/3647858	PTP3/PTP2	2	1	3647858	1	3638940
BP	GO:1901137	carbohydrate derivative biosynthetic process	11/396	62/1861	0.800092	0.999999	3637784/3641607/3646425/3645575/3644405/3643674/3641117/3645443/3638789/3644794/3635743	MNN1/CAALFM_C601370WA/KTR4/GWT1/MNN2/DIE2/MNN22/KTR2/MNN24/MNN15/STT3	11	7	3637784/3646425/3645575/3643674/3638789/3644794/3635743	4	3641607/3644405/3641117/3645443
BP	GO:0009056	catabolic process	14/396	78/1861	0.807781	0.999999	3634797/3634854/3645987/3644563/3644562/3635164/3636500/3639558/3645874/3647039/3647089/3636598/3636957/30515395	LIP3/LIP2/LIP4/GPD2/PLB2/CAALFM_C304970CA/PRE1/CAALFM_C106390WA/CAALFM_C602300CA/SPO1/PLB3/POX1-3/PRE10/PRE6	14	5	3634797/3634854/3647039/3647089/3636598	9	3645987/3644563/3644562/3635164/3636500/3639558/3645874/3636957/30515395
BP	GO:0006464	cellular protein modification process	36/396	190/1861	0.821259	0.999999	3637784/3644836/3634866/3641607/3646425/3645575/3646075/3647903/3645897/3644405/3635769/3635164/3641888/3634879/3638940/3643674/3646497/3636636/3647784/3642643/3635812/3647858/3639317/3637922/3641117/3646158/3642459/3645443/3644838/3638789/3645878/3644794/3642789/3641611/3635743/3637394	MNN1/CAALFM_CR06040WA/SWE1/CAALFM_C601370WA/KTR4/GWT1/PKH3/CAALFM_C600170CA/GCN2/MNN2/CAALFM_C202020WA/CAALFM_C304970CA/MPS1/TPK1/PTP3/DIE2/CAALFM_C108540CA/CAALFM_C302260CA/KIC1/SNF1/CPR3/PTP2/UBP6/BUB1/MNN22/CAALFM_C405250WA/CEK2/KTR2/CDC28/MNN24/HRR25/MNN15/CEK1/PTK2/STT3/CHK1	36	19	3637784/3644836/3634866/3646425/3645575/3645897/3634879/3643674/3646497/3647784/3647858/3637922/3646158/3642459/3644838/3638789/3644794/3642789/3635743	17	3641607/3646075/3647903/3644405/3635769/3635164/3641888/3638940/3636636/3642643/3635812/3639317/3641117/3645443/3645878/3641611/3637394
BP	GO:0036211	protein modification process	36/396	190/1861	0.821259	0.999999	3637784/3644836/3634866/3641607/3646425/3645575/3646075/3647903/3645897/3644405/3635769/3635164/3641888/3634879/3638940/3643674/3646497/3636636/3647784/3642643/3635812/3647858/3639317/3637922/3641117/3646158/3642459/3645443/3644838/3638789/3645878/3644794/3642789/3641611/3635743/3637394	MNN1/CAALFM_CR06040WA/SWE1/CAALFM_C601370WA/KTR4/GWT1/PKH3/CAALFM_C600170CA/GCN2/MNN2/CAALFM_C202020WA/CAALFM_C304970CA/MPS1/TPK1/PTP3/DIE2/CAALFM_C108540CA/CAALFM_C302260CA/KIC1/SNF1/CPR3/PTP2/UBP6/BUB1/MNN22/CAALFM_C405250WA/CEK2/KTR2/CDC28/MNN24/HRR25/MNN15/CEK1/PTK2/STT3/CHK1	36	19	3637784/3644836/3634866/3646425/3645575/3645897/3634879/3643674/3646497/3647784/3647858/3637922/3646158/3642459/3644838/3638789/3644794/3642789/3635743	17	3641607/3646075/3647903/3644405/3635769/3635164/3641888/3638940/3636636/3642643/3635812/3639317/3641117/3645443/3645878/3641611/3637394
BP	GO:1901565	organonitrogen compound catabolic process	6/396	37/1861	0.831771	0.999999	3635164/3636500/3639558/3645874/3636957/30515395	CAALFM_C304970CA/PRE1/CAALFM_C106390WA/CAALFM_C602300CA/PRE10/PRE6	6	0		6	3635164/3636500/3639558/3645874/3636957/30515395
BP	GO:0032787	monocarboxylic acid metabolic process	2/396	14/1861	0.833126	0.999999	3639688/3636598	ACC1/POX1-3	2	2	3639688/3636598	0
BP	GO:0033365	protein localization to organelle	2/396	14/1861	0.833126	0.999999	3636513/3641898	SRP101/PHO88	2	0		2	3636513/3641898
BP	GO:0007049	cell cycle	4/396	26/1861	0.836633	0.999999	3635656/3643783/3645874/3638037	ASK1/MTW1/CAALFM_C602300CA/DCC1	4	3	3635656/3643783/3638037	1	3645874
BP	GO:1901135	carbohydrate derivative metabolic process	14/396	80/1861	0.837362	0.999999	3637784/3641607/3646425/3645575/3644563/3644405/3638426/3639233/3643674/3641117/3645443/3638789/3644794/3635743	MNN1/CAALFM_C601370WA/KTR4/GWT1/GPD2/MNN2/PNP1/QCR7/DIE2/MNN22/KTR2/MNN24/MNN15/STT3	14	8	3637784/3646425/3645575/3638426/3643674/3638789/3644794/3635743	6	3641607/3644563/3644405/3639233/3641117/3645443
BP	GO:0044281	small molecule metabolic process	28/396	152/1861	0.84187	0.999999	3644012/3638966/3640275/3639701/3643784/3645124/3636824/3645956/3639180/3640285/3645137/3639339/3638426/3638382/3639321/3639233/3638346/3635826/3636398/3639691/3645025/3647777/3646086/3639688/3643808/3636598/3648087/3639519	ILV5/INO1/NAM2/PCK1/IPK2/CAALFM_CR03110WA/FRS2/ILS1/ARG3/ALA1/CAALFM_CR03400WA/LEU4/PNP1/MET13/TRP1/QCR7/PHA2/HOM2/MSM1/ARG1/HIS4/HIS3/CAALFM_C600390WA/ACC1/LEU42/POX1-3/TRP5/GLT1	28	6	3643784/3636824/3638426/3639688/3636598/3639519	22	3644012/3638966/3640275/3639701/3645124/3645956/3639180/3640285/3645137/3639339/3638382/3639321/3639233/3638346/3635826/3636398/3639691/3645025/3647777/3646086/3643808/3648087
BP	GO:0016310	phosphorylation	19/396	107/1861	0.851038	0.999999	3644836/3634866/3646075/3645897/3644045/3641888/3634879/3639233/3646497/3636636/3647784/3642643/3637922/3642459/3644838/3645878/3642789/3641611/3637394	CAALFM_CR06040WA/SWE1/PKH3/GCN2/HAL21/MPS1/TPK1/QCR7/CAALFM_C108540CA/CAALFM_C302260CA/KIC1/SNF1/BUB1/CEK2/CDC28/HRR25/CEK1/PTK2/CHK1	19	10	3644836/3634866/3645897/3634879/3646497/3647784/3637922/3642459/3644838/3642789	9	3646075/3644045/3641888/3639233/3636636/3642643/3645878/3641611/3637394
BP	GO:0006468	protein phosphorylation	17/396	99/1861	0.877185	0.999999	3644836/3634866/3646075/3645897/3641888/3634879/3646497/3636636/3647784/3642643/3637922/3642459/3644838/3645878/3642789/3641611/3637394	CAALFM_CR06040WA/SWE1/PKH3/GCN2/MPS1/TPK1/CAALFM_C108540CA/CAALFM_C302260CA/KIC1/SNF1/BUB1/CEK2/CDC28/HRR25/CEK1/PTK2/CHK1	17	10	3644836/3634866/3645897/3634879/3646497/3647784/3637922/3642459/3644838/3642789	7	3646075/3641888/3636636/3642643/3645878/3641611/3637394
BP	GO:0006259	DNA metabolic process	14/396	85/1861	0.896206	0.999999	3638890/3642966/3642989/3641632/3637836/3645324/3638917/3645374/3637340/3646519/3635251/3643106/3639681/3643294	RFC5/CAALFM_C407010CA/RNR1/FPG1/CAALFM_C403230CA/CAS1/CAALFM_CR10180WA/RAD2/RAD32/CAALFM_C406020CA/CAALFM_C304740CA/OGG1/MMS22/MLH3	14	3	3638890/3645324/3638917	11	3642966/3642989/3641632/3637836/3645374/3637340/3646519/3635251/3643106/3639681/3643294
BP	GO:0044085	cellular component biogenesis	9/396	58/1861	0.898569	0.999999	30515358/3638917/3642502/3638023/3641165/3641026/30515038/3646043/3638433	HHO1/CAALFM_CR10180WA/CAALFM_CR05970CA/RPP0/CAALFM_C404820CA/CAALFM_CR04110WA/PET100/ARC15/ECM29	9	4	30515358/3638917/3641026/3646043	5	3642502/3638023/3641165/30515038/3638433
BP	GO:0019637	organophosphate metabolic process	12/396	75/1861	0.90398	0.999999	3638966/3644557/3643784/3641607/3645575/3644563/3644045/3644562/3639233/3647039/3647089/3647957	INO1/CHO1/IPK2/CAALFM_C601370WA/GWT1/GPD2/HAL21/PLB2/QCR7/SPO1/PLB3/MSS4	12	6	3644557/3643784/3645575/3647039/3647089/3647957	6	3638966/3641607/3644563/3644045/3644562/3639233
BP	GO:0043412	macromolecule modification	38/396	211/1861	0.908694	0.999999	3637784/3647604/3644836/3634866/3641607/3646425/3645575/3646075/3647903/3645897/3644405/3635769/3635164/3641888/3634879/3638940/3643674/3646497/3636636/3647784/3642643/3635812/3647858/3639317/3637922/3641117/3646158/3642459/3641026/3645443/3644838/3638789/3645878/3644794/3642789/3641611/3635743/3637394	MNN1/CAALFM_C112570CA/CAALFM_CR06040WA/SWE1/CAALFM_C601370WA/KTR4/GWT1/PKH3/CAALFM_C600170CA/GCN2/MNN2/CAALFM_C202020WA/CAALFM_C304970CA/MPS1/TPK1/PTP3/DIE2/CAALFM_C108540CA/CAALFM_C302260CA/KIC1/SNF1/CPR3/PTP2/UBP6/BUB1/MNN22/CAALFM_C405250WA/CEK2/CAALFM_CR04110WA/KTR2/CDC28/MNN24/HRR25/MNN15/CEK1/PTK2/STT3/CHK1	38	21	3637784/3647604/3644836/3634866/3646425/3645575/3645897/3634879/3643674/3646497/3647784/3647858/3637922/3646158/3642459/3641026/3644838/3638789/3644794/3642789/3635743	17	3641607/3646075/3647903/3644405/3635769/3635164/3641888/3638940/3636636/3642643/3635812/3639317/3641117/3645443/3645878/3641611/3637394
BP	GO:0006366	transcription by RNA polymerase II	5/396	36/1861	0.909098	0.999999	3644534/3639245/3643511/3636918/3644103	CAALFM_C601920CA/CAALFM_C602790CA/AFT2/MED17/MED18	5	1	3644103	4	3644534/3639245/3643511/3636918
BP	GO:0001522	pseudouridine synthesis	1/396	10/1861	0.909205	0.999999	3641026	CAALFM_CR04110WA	1	1	3641026	0
BP	GO:0006820	anion transport	1/396	10/1861	0.909205	0.999999	3645976	CAALFM_C604550CA	1	0		1	3645976
BP	GO:0051246	regulation of protein metabolic process	1/396	10/1861	0.909205	0.999999	3641648	ANB1	1	0		1	3641648
BP	GO:0072330	monocarboxylic acid biosynthetic process	1/396	10/1861	0.909205	0.999999	3639688	ACC1	1	1	3639688	0
BP	GO:0044248	cellular catabolic process	10/396	65/1861	0.913604	0.999999	3644562/3635164/3636500/3639558/3645874/3647039/3647089/3636598/3636957/30515395	PLB2/CAALFM_C304970CA/PRE1/CAALFM_C106390WA/CAALFM_C602300CA/SPO1/PLB3/POX1-3/PRE10/PRE6	10	3	3647039/3647089/3636598	7	3644562/3635164/3636500/3639558/3645874/3636957/30515395
BP	GO:0006397	mRNA processing	2/396	18/1861	0.921938	0.999999	3644534/3643518	CAALFM_C601920CA/CAALFM_C206800CA	2	1	3643518	1	3644534
BP	GO:0098655	cation transmembrane transport	4/396	31/1861	0.922326	0.999999	3643318/3646070/3639546/3647441	FTR1/STV1/HAK1/MID1	4	2	3639546/3647441	2	3643318/3646070
BP	GO:0098660	inorganic ion transmembrane transport	4/396	31/1861	0.922326	0.999999	3643318/3646070/3639546/3647441	FTR1/STV1/HAK1/MID1	4	2	3639546/3647441	2	3643318/3646070
BP	GO:0098662	inorganic cation transmembrane transport	4/396	31/1861	0.922326	0.999999	3643318/3646070/3639546/3647441	FTR1/STV1/HAK1/MID1	4	2	3639546/3647441	2	3643318/3646070
BP	GO:0006261	DNA-dependent DNA replication	1/396	11/1861	0.928629	0.999999	3639681	MMS22	1	0		1	3639681
BP	GO:0006887	exocytosis	1/396	11/1861	0.928629	0.999999	3647078	SEC8	1	0		1	3647078
BP	GO:0007010	cytoskeleton organization	1/396	11/1861	0.928629	0.999999	3646043	ARC15	1	1	3646043	0
BP	GO:0032940	secretion by cell	1/396	11/1861	0.928629	0.999999	3647078	SEC8	1	0		1	3647078
BP	GO:0046903	secretion	1/396	11/1861	0.928629	0.999999	3647078	SEC8	1	0		1	3647078
BP	GO:0051726	regulation of cell cycle	1/396	11/1861	0.928629	0.999999	3645874	CAALFM_C602300CA	1	0		1	3645874
BP	GO:0051188	cofactor biosynthetic process	3/396	26/1861	0.938123	0.999999	3647071/3641233/3645211	COX15/CAALFM_C210860CA/HEM15	3	0		3	3647071/3641233/3645211
BP	GO:0051649	establishment of localization in cell	9/396	63/1861	0.943511	0.999999	3642791/3639212/3645870/3636513/3647650/3641898/3636817/3645567/3647441	CAALFM_C406460CA/CAALFM_C602720CA/SEC27/SRP101/TOM22/PHO88/TOM20/VPS35/MID1	9	4	3642791/3639212/3645567/3647441	5	3645870/3636513/3647650/3641898/3636817
BP	GO:0071705	nitrogen compound transport	9/396	63/1861	0.943511	0.999999	3642793/3639212/3645870/3636513/3647650/3641898/3636817/3645567/3645022	CAALFM_C406440CA/CAALFM_C602720CA/SEC27/SRP101/TOM22/PHO88/TOM20/VPS35/MEP2	9	3	3642793/3639212/3645567	6	3645870/3636513/3647650/3641898/3636817/3645022
BP	GO:0008033	tRNA processing	3/396	27/1861	0.948093	0.999999	3647604/3643778/3646411	CAALFM_C112570CA/SMM1/SEN15	3	3	3647604/3643778/3646411	0
BP	GO:0015672	monovalent inorganic cation transport	3/396	27/1861	0.948093	0.999999	3646070/3639546/3639861	STV1/HAK1/PHO87	3	2	3639546/3639861	1	3646070
BP	GO:0071702	organic substance transport	9/396	64/1861	0.950042	0.999999	3642793/3639212/3645870/3636513/3647650/3641898/3636817/3647897/3645567	CAALFM_C406440CA/CAALFM_C602720CA/SEC27/SRP101/TOM22/PHO88/TOM20/HET1/VPS35	9	3	3642793/3639212/3645567	6	3645870/3636513/3647650/3641898/3636817/3647897
BP	GO:0009889	regulation of biosynthetic process	28/396	168/1861	0.951539	0.999999	3641635/3635261/3647664/3641740/3640990/3635819/3638534/3639254/3641648/3648000/3639245/3641370/3643511/3636918/3640208/3646988/3643754/3641886/3637740/3644691/3636640/3642915/3635666/3646354/3635788/3634867/3644103/3645016	ZCF18/TEC1/BRG1/ZCF35/CAALFM_CR04250WA/CAALFM_C202530WA/ZFU2/POL5/ANB1/ECM22/CAALFM_C602790CA/ZCF29/AFT2/MED17/STB5/FGR27/ZNC1/UGA33/CAALFM_C502750CA/WAR1/CAP1/CZF1/ZCF26/ZCF13/CTF1/SFU1/MED18/CAALFM_C400390WA	28	9	3635261/3647664/3641740/3648000/3637740/3642915/3635666/3634867/3644103	19	3641635/3640990/3635819/3638534/3639254/3641648/3639245/3641370/3643511/3636918/3640208/3646988/3643754/3641886/3644691/3636640/3646354/3635788/3645016
BP	GO:0010556	regulation of macromolecule biosynthetic process	28/396	168/1861	0.951539	0.999999	3641635/3635261/3647664/3641740/3640990/3635819/3638534/3639254/3641648/3648000/3639245/3641370/3643511/3636918/3640208/3646988/3643754/3641886/3637740/3644691/3636640/3642915/3635666/3646354/3635788/3634867/3644103/3645016	ZCF18/TEC1/BRG1/ZCF35/CAALFM_CR04250WA/CAALFM_C202530WA/ZFU2/POL5/ANB1/ECM22/CAALFM_C602790CA/ZCF29/AFT2/MED17/STB5/FGR27/ZNC1/UGA33/CAALFM_C502750CA/WAR1/CAP1/CZF1/ZCF26/ZCF13/CTF1/SFU1/MED18/CAALFM_C400390WA	28	9	3635261/3647664/3641740/3648000/3637740/3642915/3635666/3634867/3644103	19	3641635/3640990/3635819/3638534/3639254/3641648/3639245/3641370/3643511/3636918/3640208/3646988/3643754/3641886/3644691/3636640/3646354/3635788/3645016
BP	GO:0031326	regulation of cellular biosynthetic process	28/396	168/1861	0.951539	0.999999	3641635/3635261/3647664/3641740/3640990/3635819/3638534/3639254/3641648/3648000/3639245/3641370/3643511/3636918/3640208/3646988/3643754/3641886/3637740/3644691/3636640/3642915/3635666/3646354/3635788/3634867/3644103/3645016	ZCF18/TEC1/BRG1/ZCF35/CAALFM_CR04250WA/CAALFM_C202530WA/ZFU2/POL5/ANB1/ECM22/CAALFM_C602790CA/ZCF29/AFT2/MED17/STB5/FGR27/ZNC1/UGA33/CAALFM_C502750CA/WAR1/CAP1/CZF1/ZCF26/ZCF13/CTF1/SFU1/MED18/CAALFM_C400390WA	28	9	3635261/3647664/3641740/3648000/3637740/3642915/3635666/3634867/3644103	19	3641635/3640990/3635819/3638534/3639254/3641648/3639245/3641370/3643511/3636918/3640208/3646988/3643754/3641886/3644691/3636640/3646354/3635788/3645016
BP	GO:2000112	regulation of cellular macromolecule biosynthetic process	28/396	168/1861	0.951539	0.999999	3641635/3635261/3647664/3641740/3640990/3635819/3638534/3639254/3641648/3648000/3639245/3641370/3643511/3636918/3640208/3646988/3643754/3641886/3637740/3644691/3636640/3642915/3635666/3646354/3635788/3634867/3644103/3645016	ZCF18/TEC1/BRG1/ZCF35/CAALFM_CR04250WA/CAALFM_C202530WA/ZFU2/POL5/ANB1/ECM22/CAALFM_C602790CA/ZCF29/AFT2/MED17/STB5/FGR27/ZNC1/UGA33/CAALFM_C502750CA/WAR1/CAP1/CZF1/ZCF26/ZCF13/CTF1/SFU1/MED18/CAALFM_C400390WA	28	9	3635261/3647664/3641740/3648000/3637740/3642915/3635666/3634867/3644103	19	3641635/3640990/3635819/3638534/3639254/3641648/3639245/3641370/3643511/3636918/3640208/3646988/3643754/3641886/3644691/3636640/3646354/3635788/3645016
BP	GO:0034220	ion transmembrane transport	4/396	34/1861	0.951823	0.999999	3643318/3646070/3639546/3647441	FTR1/STV1/HAK1/MID1	4	2	3639546/3647441	2	3643318/3646070
BP	GO:0034660	ncRNA metabolic process	11/396	76/1861	0.953018	0.999999	3647604/3640275/3645124/3636824/3645956/3640285/3645137/3643778/3636398/3646086/3646411	CAALFM_C112570CA/NAM2/CAALFM_CR03110WA/FRS2/ILS1/ALA1/CAALFM_CR03400WA/SMM1/MSM1/CAALFM_C600390WA/SEN15	11	4	3647604/3636824/3643778/3646411	7	3640275/3645124/3645956/3640285/3645137/3636398/3646086
BP	GO:0010468	regulation of gene expression	28/396	169/1861	0.955407	0.999999	3641635/3635261/3647664/3641740/3640990/3635819/3638534/3639254/3641648/3648000/3639245/3641370/3643511/3636918/3640208/3646988/3643754/3641886/3637740/3644691/3636640/3642915/3635666/3646354/3635788/3634867/3644103/3645016	ZCF18/TEC1/BRG1/ZCF35/CAALFM_CR04250WA/CAALFM_C202530WA/ZFU2/POL5/ANB1/ECM22/CAALFM_C602790CA/ZCF29/AFT2/MED17/STB5/FGR27/ZNC1/UGA33/CAALFM_C502750CA/WAR1/CAP1/CZF1/ZCF26/ZCF13/CTF1/SFU1/MED18/CAALFM_C400390WA	28	9	3635261/3647664/3641740/3648000/3637740/3642915/3635666/3634867/3644103	19	3641635/3640990/3635819/3638534/3639254/3641648/3639245/3641370/3643511/3636918/3640208/3646988/3643754/3641886/3644691/3636640/3646354/3635788/3645016
BP	GO:0006091	generation of precursor metabolites and energy	1/396	13/1861	0.95592	0.999999	3639233	QCR7	1	0		1	3639233
BP	GO:0044262	cellular carbohydrate metabolic process	1/396	13/1861	0.95592	0.999999	3638966	INO1	1	0		1	3638966
BP	GO:0006355	regulation of transcription, DNA-templated	27/396	164/1861	0.956462	0.999999	3641635/3635261/3647664/3641740/3640990/3635819/3638534/3639254/3648000/3639245/3641370/3643511/3636918/3640208/3646988/3643754/3641886/3637740/3644691/3636640/3642915/3635666/3646354/3635788/3634867/3644103/3645016	ZCF18/TEC1/BRG1/ZCF35/CAALFM_CR04250WA/CAALFM_C202530WA/ZFU2/POL5/ECM22/CAALFM_C602790CA/ZCF29/AFT2/MED17/STB5/FGR27/ZNC1/UGA33/CAALFM_C502750CA/WAR1/CAP1/CZF1/ZCF26/ZCF13/CTF1/SFU1/MED18/CAALFM_C400390WA	27	9	3635261/3647664/3641740/3648000/3637740/3642915/3635666/3634867/3644103	18	3641635/3640990/3635819/3638534/3639254/3639245/3641370/3643511/3636918/3640208/3646988/3643754/3641886/3644691/3636640/3646354/3635788/3645016
BP	GO:0051252	regulation of RNA metabolic process	27/396	164/1861	0.956462	0.999999	3641635/3635261/3647664/3641740/3640990/3635819/3638534/3639254/3648000/3639245/3641370/3643511/3636918/3640208/3646988/3643754/3641886/3637740/3644691/3636640/3642915/3635666/3646354/3635788/3634867/3644103/3645016	ZCF18/TEC1/BRG1/ZCF35/CAALFM_CR04250WA/CAALFM_C202530WA/ZFU2/POL5/ECM22/CAALFM_C602790CA/ZCF29/AFT2/MED17/STB5/FGR27/ZNC1/UGA33/CAALFM_C502750CA/WAR1/CAP1/CZF1/ZCF26/ZCF13/CTF1/SFU1/MED18/CAALFM_C400390WA	27	9	3635261/3647664/3641740/3648000/3637740/3642915/3635666/3634867/3644103	18	3641635/3640990/3635819/3638534/3639254/3639245/3641370/3643511/3636918/3640208/3646988/3643754/3641886/3644691/3636640/3646354/3635788/3645016
BP	GO:1903506	regulation of nucleic acid-templated transcription	27/396	164/1861	0.956462	0.999999	3641635/3635261/3647664/3641740/3640990/3635819/3638534/3639254/3648000/3639245/3641370/3643511/3636918/3640208/3646988/3643754/3641886/3637740/3644691/3636640/3642915/3635666/3646354/3635788/3634867/3644103/3645016	ZCF18/TEC1/BRG1/ZCF35/CAALFM_CR04250WA/CAALFM_C202530WA/ZFU2/POL5/ECM22/CAALFM_C602790CA/ZCF29/AFT2/MED17/STB5/FGR27/ZNC1/UGA33/CAALFM_C502750CA/WAR1/CAP1/CZF1/ZCF26/ZCF13/CTF1/SFU1/MED18/CAALFM_C400390WA	27	9	3635261/3647664/3641740/3648000/3637740/3642915/3635666/3634867/3644103	18	3641635/3640990/3635819/3638534/3639254/3639245/3641370/3643511/3636918/3640208/3646988/3643754/3641886/3644691/3636640/3646354/3635788/3645016
BP	GO:2001141	regulation of RNA biosynthetic process	27/396	164/1861	0.956462	0.999999	3641635/3635261/3647664/3641740/3640990/3635819/3638534/3639254/3648000/3639245/3641370/3643511/3636918/3640208/3646988/3643754/3641886/3637740/3644691/3636640/3642915/3635666/3646354/3635788/3634867/3644103/3645016	ZCF18/TEC1/BRG1/ZCF35/CAALFM_CR04250WA/CAALFM_C202530WA/ZFU2/POL5/ECM22/CAALFM_C602790CA/ZCF29/AFT2/MED17/STB5/FGR27/ZNC1/UGA33/CAALFM_C502750CA/WAR1/CAP1/CZF1/ZCF26/ZCF13/CTF1/SFU1/MED18/CAALFM_C400390WA	27	9	3635261/3647664/3641740/3648000/3637740/3642915/3635666/3634867/3644103	18	3641635/3640990/3635819/3638534/3639254/3639245/3641370/3643511/3636918/3640208/3646988/3643754/3641886/3644691/3636640/3646354/3635788/3645016
BP	GO:0042254	ribosome biogenesis	3/396	28/1861	0.956552	0.999999	3638023/3641165/3641026	RPP0/CAALFM_C404820CA/CAALFM_CR04110WA	3	1	3641026	2	3638023/3641165
BP	GO:0009451	RNA modification	2/396	21/1861	0.956929	0.999999	3647604/3641026	CAALFM_C112570CA/CAALFM_CR04110WA	2	2	3647604/3641026	0
BP	GO:0016071	mRNA metabolic process	2/396	21/1861	0.956929	0.999999	3644534/3643518	CAALFM_C601920CA/CAALFM_C206800CA	2	1	3643518	1	3644534
BP	GO:0051641	cellular localization	11/396	77/1861	0.958209	0.999999	3642791/3639212/3645870/3636513/3647650/3641898/3636817/3647078/3636834/3645567/3647441	CAALFM_C406460CA/CAALFM_C602720CA/SEC27/SRP101/TOM22/PHO88/TOM20/SEC8/CAALFM_C102960CA/VPS35/MID1	11	5	3642791/3639212/3636834/3645567/3647441	6	3645870/3636513/3647650/3641898/3636817/3647078
BP	GO:0016192	vesicle-mediated transport	9/396	66/1861	0.961137	0.999999	3642791/3637401/3636793/3639212/3645870/3638440/3644584/3647078/3645567	CAALFM_C406460CA/CAALFM_C203800CA/CAALFM_C102410CA/CAALFM_C602720CA/SEC27/CAALFM_C307130WA/CAALFM_C102160WA/SEC8/VPS35	9	6	3642791/3637401/3636793/3639212/3644584/3645567	3	3645870/3638440/3647078
BP	GO:0019219	regulation of nucleobase-containing compound metabolic process	27/396	166/1861	0.963354	0.999999	3641635/3635261/3647664/3641740/3640990/3635819/3638534/3639254/3648000/3639245/3641370/3643511/3636918/3640208/3646988/3643754/3641886/3637740/3644691/3636640/3642915/3635666/3646354/3635788/3634867/3644103/3645016	ZCF18/TEC1/BRG1/ZCF35/CAALFM_CR04250WA/CAALFM_C202530WA/ZFU2/POL5/ECM22/CAALFM_C602790CA/ZCF29/AFT2/MED17/STB5/FGR27/ZNC1/UGA33/CAALFM_C502750CA/WAR1/CAP1/CZF1/ZCF26/ZCF13/CTF1/SFU1/MED18/CAALFM_C400390WA	27	9	3635261/3647664/3641740/3648000/3637740/3642915/3635666/3634867/3644103	18	3641635/3640990/3635819/3638534/3639254/3639245/3641370/3643511/3636918/3640208/3646988/3643754/3641886/3644691/3636640/3646354/3635788/3645016
BP	GO:0006790	sulfur compound metabolic process	1/396	14/1861	0.965366	0.999999	3638382	MET13	1	0		1	3638382
BP	GO:0032259	methylation	1/396	14/1861	0.965366	0.999999	3638471	CAALFM_C307400WA	1	1	3638471	0
BP	GO:0046907	intracellular transport	8/396	61/1861	0.965585	0.999999	3642791/3639212/3645870/3636513/3647650/3641898/3636817/3645567	CAALFM_C406460CA/CAALFM_C602720CA/SEC27/SRP101/TOM22/PHO88/TOM20/VPS35	8	3	3642791/3639212/3645567	5	3645870/3636513/3647650/3641898/3636817
BP	GO:0033036	macromolecule localization	9/396	67/1861	0.965814	0.999999	3639212/3645870/3636513/3647650/3641183/3641898/3636817/3647897/3645567	CAALFM_C602720CA/SEC27/SRP101/TOM22/CAALFM_C404180CA/PHO88/TOM20/HET1/VPS35	9	2	3639212/3645567	7	3645870/3636513/3647650/3641183/3641898/3636817/3647897
BP	GO:0016043	cellular component organization	15/396	102/1861	0.967886	0.999999	3646288/3638980/30515358/3642478/3638917/3641648/3642502/3645874/3638037/3636834/3647897/30515038/3646043/3635251/3638433	PEX11/PGA1/HHO1/CAALFM_C105400CA/CAALFM_CR10180WA/ANB1/CAALFM_CR05970CA/CAALFM_C602300CA/DCC1/CAALFM_C102960CA/HET1/PET100/ARC15/CAALFM_C304740CA/ECM29	15	6	3638980/30515358/3638917/3638037/3636834/3646043	9	3646288/3642478/3641648/3642502/3645874/3647897/30515038/3635251/3638433
BP	GO:0006796	phosphate-containing compound metabolic process	31/396	189/1861	0.968588	0.999999	3638966/3644557/3644836/3634866/3643784/3641607/3645575/3644563/3646075/3645897/3644045/3644562/3641888/3634879/3639233/3638940/3646497/3636636/3647784/3642643/3647858/3637922/3642459/3647039/3647089/3644838/3645878/3642789/3641611/3647957/3637394	INO1/CHO1/CAALFM_CR06040WA/SWE1/IPK2/CAALFM_C601370WA/GWT1/GPD2/PKH3/GCN2/HAL21/PLB2/MPS1/TPK1/QCR7/PTP3/CAALFM_C108540CA/CAALFM_C302260CA/KIC1/SNF1/PTP2/BUB1/CEK2/SPO1/PLB3/CDC28/HRR25/CEK1/PTK2/MSS4/CHK1	31	17	3644557/3644836/3634866/3643784/3645575/3645897/3634879/3646497/3647784/3647858/3637922/3642459/3647039/3647089/3644838/3642789/3647957	14	3638966/3641607/3644563/3646075/3644045/3644562/3641888/3639233/3638940/3636636/3642643/3645878/3641611/3637394
BP	GO:0022613	ribonucleoprotein complex biogenesis	3/396	30/1861	0.969748	0.999999	3638023/3641165/3641026	RPP0/CAALFM_C404820CA/CAALFM_CR04110WA	3	1	3641026	2	3638023/3641165
BP	GO:0015031	protein transport	7/396	56/1861	0.970277	0.999999	3639212/3645870/3636513/3647650/3641898/3636817/3645567	CAALFM_C602720CA/SEC27/SRP101/TOM22/PHO88/TOM20/VPS35	7	2	3639212/3645567	5	3645870/3636513/3647650/3641898/3636817
BP	GO:0015833	peptide transport	7/396	56/1861	0.970277	0.999999	3639212/3645870/3636513/3647650/3641898/3636817/3645567	CAALFM_C602720CA/SEC27/SRP101/TOM22/PHO88/TOM20/VPS35	7	2	3639212/3645567	5	3645870/3636513/3647650/3641898/3636817
BP	GO:0042886	amide transport	7/396	56/1861	0.970277	0.999999	3639212/3645870/3636513/3647650/3641898/3636817/3645567	CAALFM_C602720CA/SEC27/SRP101/TOM22/PHO88/TOM20/VPS35	7	2	3639212/3645567	5	3645870/3636513/3647650/3641898/3636817
BP	GO:0006886	intracellular protein transport	6/396	50/1861	0.97115	0.999999	3639212/3645870/3636513/3647650/3641898/3636817	CAALFM_C602720CA/SEC27/SRP101/TOM22/PHO88/TOM20	6	1	3639212	5	3645870/3636513/3647650/3641898/3636817
BP	GO:0006793	phosphorus metabolic process	31/396	190/1861	0.971157	0.999999	3638966/3644557/3644836/3634866/3643784/3641607/3645575/3644563/3646075/3645897/3644045/3644562/3641888/3634879/3639233/3638940/3646497/3636636/3647784/3642643/3647858/3637922/3642459/3647039/3647089/3644838/3645878/3642789/3641611/3647957/3637394	INO1/CHO1/CAALFM_CR06040WA/SWE1/IPK2/CAALFM_C601370WA/GWT1/GPD2/PKH3/GCN2/HAL21/PLB2/MPS1/TPK1/QCR7/PTP3/CAALFM_C108540CA/CAALFM_C302260CA/KIC1/SNF1/PTP2/BUB1/CEK2/SPO1/PLB3/CDC28/HRR25/CEK1/PTK2/MSS4/CHK1	31	17	3644557/3644836/3634866/3643784/3645575/3645897/3634879/3646497/3647784/3647858/3637922/3642459/3647039/3647089/3644838/3642789/3647957	14	3638966/3641607/3644563/3646075/3644045/3644562/3641888/3639233/3638940/3636636/3642643/3645878/3641611/3637394
BP	GO:0050794	regulation of cellular process	43/396	253/1861	0.971681	0.999999	3641635/3635261/3647664/3641740/3640990/3635819/3638534/3639254/3637052/3641648/3637434/3648000/3636184/3639245/3641370/3644458/3643511/3636918/3641358/3645874/3640208/3646988/3646660/3646953/3643754/3643298/3641886/3637740/3639313/3641367/3644691/3635220/3646043/3636640/3642915/3640185/3635666/3646354/3635788/3634867/3644103/3645016/3637394	ZCF18/TEC1/BRG1/ZCF35/CAALFM_CR04250WA/CAALFM_C202530WA/ZFU2/POL5/IQG1/ANB1/ROM2/ECM22/SSK1/CAALFM_C602790CA/ZCF29/YPD1/AFT2/MED17/NIK1/CAALFM_C602300CA/STB5/FGR27/CAALFM_C107630WA/TSC2/ZNC1/GDI1/UGA33/CAALFM_C502750CA/TTR1/PDI1/WAR1/SEC7/ARC15/CAP1/CZF1/CAALFM_C101300WA/ZCF26/ZCF13/CTF1/SFU1/MED18/CAALFM_C400390WA/CHK1	43	13	3635261/3647664/3641740/3637052/3648000/3646953/3637740/3635220/3646043/3642915/3635666/3634867/3644103	30	3641635/3640990/3635819/3638534/3639254/3641648/3637434/3636184/3639245/3641370/3644458/3643511/3636918/3641358/3645874/3640208/3646988/3646660/3643754/3643298/3641886/3639313/3641367/3644691/3636640/3640185/3646354/3635788/3645016/3637394
BP	GO:0008380	RNA splicing	1/396	15/1861	0.972791	0.999999	3646411	SEN15	1	1	3646411	0
BP	GO:0031323	regulation of cellular metabolic process	28/396	175/1861	0.97351	0.999999	3641635/3635261/3647664/3641740/3640990/3635819/3638534/3639254/3641648/3648000/3639245/3641370/3643511/3636918/3640208/3646988/3643754/3641886/3637740/3644691/3636640/3642915/3635666/3646354/3635788/3634867/3644103/3645016	ZCF18/TEC1/BRG1/ZCF35/CAALFM_CR04250WA/CAALFM_C202530WA/ZFU2/POL5/ANB1/ECM22/CAALFM_C602790CA/ZCF29/AFT2/MED17/STB5/FGR27/ZNC1/UGA33/CAALFM_C502750CA/WAR1/CAP1/CZF1/ZCF26/ZCF13/CTF1/SFU1/MED18/CAALFM_C400390WA	28	9	3635261/3647664/3641740/3648000/3637740/3642915/3635666/3634867/3644103	19	3641635/3640990/3635819/3638534/3639254/3641648/3639245/3641370/3643511/3636918/3640208/3646988/3643754/3641886/3644691/3636640/3646354/3635788/3645016
BP	GO:0051171	regulation of nitrogen compound metabolic process	28/396	176/1861	0.975799	0.999999	3641635/3635261/3647664/3641740/3640990/3635819/3638534/3639254/3641648/3648000/3639245/3641370/3643511/3636918/3640208/3646988/3643754/3641886/3637740/3644691/3636640/3642915/3635666/3646354/3635788/3634867/3644103/3645016	ZCF18/TEC1/BRG1/ZCF35/CAALFM_CR04250WA/CAALFM_C202530WA/ZFU2/POL5/ANB1/ECM22/CAALFM_C602790CA/ZCF29/AFT2/MED17/STB5/FGR27/ZNC1/UGA33/CAALFM_C502750CA/WAR1/CAP1/CZF1/ZCF26/ZCF13/CTF1/SFU1/MED18/CAALFM_C400390WA	28	9	3635261/3647664/3641740/3648000/3637740/3642915/3635666/3634867/3644103	19	3641635/3640990/3635819/3638534/3639254/3641648/3639245/3641370/3643511/3636918/3640208/3646988/3643754/3641886/3644691/3636640/3646354/3635788/3645016
BP	GO:0080090	regulation of primary metabolic process	28/396	176/1861	0.975799	0.999999	3641635/3635261/3647664/3641740/3640990/3635819/3638534/3639254/3641648/3648000/3639245/3641370/3643511/3636918/3640208/3646988/3643754/3641886/3637740/3644691/3636640/3642915/3635666/3646354/3635788/3634867/3644103/3645016	ZCF18/TEC1/BRG1/ZCF35/CAALFM_CR04250WA/CAALFM_C202530WA/ZFU2/POL5/ANB1/ECM22/CAALFM_C602790CA/ZCF29/AFT2/MED17/STB5/FGR27/ZNC1/UGA33/CAALFM_C502750CA/WAR1/CAP1/CZF1/ZCF26/ZCF13/CTF1/SFU1/MED18/CAALFM_C400390WA	28	9	3635261/3647664/3641740/3648000/3637740/3642915/3635666/3634867/3644103	19	3641635/3640990/3635819/3638534/3639254/3641648/3639245/3641370/3643511/3636918/3640208/3646988/3643754/3641886/3644691/3636640/3646354/3635788/3645016
BP	GO:0045184	establishment of protein localization	7/396	58/1861	0.977704	0.999999	3639212/3645870/3636513/3647650/3641898/3636817/3645567	CAALFM_C602720CA/SEC27/SRP101/TOM22/PHO88/TOM20/VPS35	7	2	3639212/3645567	5	3645870/3636513/3647650/3641898/3636817
BP	GO:0006352	DNA-templated transcription, initiation	1/396	16/1861	0.978628	0.999999	3647675	TBP1	1	0		1	3647675
BP	GO:0018193	peptidyl-amino acid modification	1/396	16/1861	0.978628	0.999999	3635812	CPR3	1	0		1	3635812
BP	GO:0050789	regulation of biological process	43/396	257/1861	0.979311	0.999999	3641635/3635261/3647664/3641740/3640990/3635819/3638534/3639254/3637052/3641648/3637434/3648000/3636184/3639245/3641370/3644458/3643511/3636918/3641358/3645874/3640208/3646988/3646660/3646953/3643754/3643298/3641886/3637740/3639313/3641367/3644691/3635220/3646043/3636640/3642915/3640185/3635666/3646354/3635788/3634867/3644103/3645016/3637394	ZCF18/TEC1/BRG1/ZCF35/CAALFM_CR04250WA/CAALFM_C202530WA/ZFU2/POL5/IQG1/ANB1/ROM2/ECM22/SSK1/CAALFM_C602790CA/ZCF29/YPD1/AFT2/MED17/NIK1/CAALFM_C602300CA/STB5/FGR27/CAALFM_C107630WA/TSC2/ZNC1/GDI1/UGA33/CAALFM_C502750CA/TTR1/PDI1/WAR1/SEC7/ARC15/CAP1/CZF1/CAALFM_C101300WA/ZCF26/ZCF13/CTF1/SFU1/MED18/CAALFM_C400390WA/CHK1	43	13	3635261/3647664/3641740/3637052/3648000/3646953/3637740/3635220/3646043/3642915/3635666/3634867/3644103	30	3641635/3640990/3635819/3638534/3639254/3641648/3637434/3636184/3639245/3641370/3644458/3643511/3636918/3641358/3645874/3640208/3646988/3646660/3643754/3643298/3641886/3639313/3641367/3644691/3636640/3640185/3646354/3635788/3645016/3637394
BP	GO:0051276	chromosome organization	5/396	46/1861	0.980226	0.999999	30515358/3638917/3645874/3638037/3635251	HHO1/CAALFM_CR10180WA/CAALFM_C602300CA/DCC1/CAALFM_C304740CA	5	3	30515358/3638917/3638037	2	3645874/3635251
BP	GO:0065007	biological regulation	45/396	268/1861	0.980281	0.999999	3641635/3635261/3647664/3641740/3640990/3635819/3638534/3639254/3637052/3641648/3637434/3648000/3636184/3639245/3641370/3644458/3643511/3636918/3641183/3641358/3645874/3640208/3646988/3646660/3646953/3643754/3643298/3641886/3637740/3639313/3641367/3644691/3635220/3646043/3636640/3642915/3640185/3635666/3646354/3635788/3634867/3644103/3647441/3645016/3637394	ZCF18/TEC1/BRG1/ZCF35/CAALFM_CR04250WA/CAALFM_C202530WA/ZFU2/POL5/IQG1/ANB1/ROM2/ECM22/SSK1/CAALFM_C602790CA/ZCF29/YPD1/AFT2/MED17/CAALFM_C404180CA/NIK1/CAALFM_C602300CA/STB5/FGR27/CAALFM_C107630WA/TSC2/ZNC1/GDI1/UGA33/CAALFM_C502750CA/TTR1/PDI1/WAR1/SEC7/ARC15/CAP1/CZF1/CAALFM_C101300WA/ZCF26/ZCF13/CTF1/SFU1/MED18/MID1/CAALFM_C400390WA/CHK1	45	14	3635261/3647664/3641740/3637052/3648000/3646953/3637740/3635220/3646043/3642915/3635666/3634867/3644103/3647441	31	3641635/3640990/3635819/3638534/3639254/3641648/3637434/3636184/3639245/3641370/3644458/3643511/3636918/3641183/3641358/3645874/3640208/3646988/3646660/3643754/3643298/3641886/3639313/3641367/3644691/3636640/3640185/3646354/3635788/3645016/3637394
BP	GO:0019222	regulation of metabolic process	28/396	179/1861	0.981655	0.999999	3641635/3635261/3647664/3641740/3640990/3635819/3638534/3639254/3641648/3648000/3639245/3641370/3643511/3636918/3640208/3646988/3643754/3641886/3637740/3644691/3636640/3642915/3635666/3646354/3635788/3634867/3644103/3645016	ZCF18/TEC1/BRG1/ZCF35/CAALFM_CR04250WA/CAALFM_C202530WA/ZFU2/POL5/ANB1/ECM22/CAALFM_C602790CA/ZCF29/AFT2/MED17/STB5/FGR27/ZNC1/UGA33/CAALFM_C502750CA/WAR1/CAP1/CZF1/ZCF26/ZCF13/CTF1/SFU1/MED18/CAALFM_C400390WA	28	9	3635261/3647664/3641740/3648000/3637740/3642915/3635666/3634867/3644103	19	3641635/3640990/3635819/3638534/3639254/3641648/3639245/3641370/3643511/3636918/3640208/3646988/3643754/3641886/3644691/3636640/3646354/3635788/3645016
BP	GO:0060255	regulation of macromolecule metabolic process	28/396	179/1861	0.981655	0.999999	3641635/3635261/3647664/3641740/3640990/3635819/3638534/3639254/3641648/3648000/3639245/3641370/3643511/3636918/3640208/3646988/3643754/3641886/3637740/3644691/3636640/3642915/3635666/3646354/3635788/3634867/3644103/3645016	ZCF18/TEC1/BRG1/ZCF35/CAALFM_CR04250WA/CAALFM_C202530WA/ZFU2/POL5/ANB1/ECM22/CAALFM_C602790CA/ZCF29/AFT2/MED17/STB5/FGR27/ZNC1/UGA33/CAALFM_C502750CA/WAR1/CAP1/CZF1/ZCF26/ZCF13/CTF1/SFU1/MED18/CAALFM_C400390WA	28	9	3635261/3647664/3641740/3648000/3637740/3642915/3635666/3634867/3644103	19	3641635/3640990/3635819/3638534/3639254/3641648/3639245/3641370/3643511/3636918/3640208/3646988/3643754/3641886/3644691/3636640/3646354/3635788/3645016
BP	GO:0008104	protein localization	7/396	61/1861	0.985697	0.999999	3639212/3645870/3636513/3647650/3641898/3636817/3645567	CAALFM_C602720CA/SEC27/SRP101/TOM22/PHO88/TOM20/VPS35	7	2	3639212/3645567	5	3645870/3636513/3647650/3641898/3636817
BP	GO:0034613	cellular protein localization	6/396	55/1861	0.986633	0.999999	3639212/3645870/3636513/3647650/3641898/3636817	CAALFM_C602720CA/SEC27/SRP101/TOM22/PHO88/TOM20	6	1	3639212	5	3645870/3636513/3647650/3641898/3636817
BP	GO:0070727	cellular macromolecule localization	6/396	55/1861	0.986633	0.999999	3639212/3645870/3636513/3647650/3641898/3636817	CAALFM_C602720CA/SEC27/SRP101/TOM22/PHO88/TOM20	6	1	3639212	5	3645870/3636513/3647650/3641898/3636817
BP	GO:0009144	purine nucleoside triphosphate metabolic process	1/396	18/1861	0.98682	0.999999	3639233	QCR7	1	0		1	3639233
BP	GO:0009199	ribonucleoside triphosphate metabolic process	1/396	18/1861	0.98682	0.999999	3639233	QCR7	1	0		1	3639233
BP	GO:0009205	purine ribonucleoside triphosphate metabolic process	1/396	18/1861	0.98682	0.999999	3639233	QCR7	1	0		1	3639233
BP	GO:0046034	ATP metabolic process	1/396	18/1861	0.98682	0.999999	3639233	QCR7	1	0		1	3639233
BP	GO:0006996	organelle organization	10/396	81/1861	0.988199	0.999999	3646288/30515358/3638917/3642502/3645874/3638037/3636834/30515038/3646043/3635251	PEX11/HHO1/CAALFM_CR10180WA/CAALFM_CR05970CA/CAALFM_C602300CA/DCC1/CAALFM_C102960CA/PET100/ARC15/CAALFM_C304740CA	10	5	30515358/3638917/3638037/3636834/3646043	5	3646288/3642502/3645874/30515038/3635251
BP	GO:0009141	nucleoside triphosphate metabolic process	1/396	19/1861	0.989652	0.999999	3639233	QCR7	1	0		1	3639233
BP	GO:0006260	DNA replication	3/396	36/1861	0.990211	0.999999	3638890/3642989/3639681	RFC5/RNR1/MMS22	3	1	3638890	2	3642989/3639681
BP	GO:0017144	drug metabolic process	3/396	36/1861	0.990211	0.999999	3644116/3639233/3638346	SPE2/QCR7/PHA2	3	1	3644116	2	3639233/3638346
BP	GO:0071840	cellular component organization or biogenesis	18/396	130/1861	0.990658	0.999999	3646288/3638980/30515358/3642478/3638917/3641648/3642502/3638023/3641165/3645874/3638037/3636834/3647897/3641026/30515038/3646043/3635251/3638433	PEX11/PGA1/HHO1/CAALFM_C105400CA/CAALFM_CR10180WA/ANB1/CAALFM_CR05970CA/RPP0/CAALFM_C404820CA/CAALFM_C602300CA/DCC1/CAALFM_C102960CA/HET1/CAALFM_CR04110WA/PET100/ARC15/CAALFM_C304740CA/ECM29	18	7	3638980/30515358/3638917/3638037/3636834/3641026/3646043	11	3646288/3642478/3641648/3642502/3638023/3641165/3645874/3647897/30515038/3635251/3638433
BP	GO:0009123	nucleoside monophosphate metabolic process	1/396	20/1861	0.991876	0.999999	3639233	QCR7	1	0		1	3639233
BP	GO:0009126	purine nucleoside monophosphate metabolic process	1/396	20/1861	0.991876	0.999999	3639233	QCR7	1	0		1	3639233
BP	GO:0009161	ribonucleoside monophosphate metabolic process	1/396	20/1861	0.991876	0.999999	3639233	QCR7	1	0		1	3639233
BP	GO:0009167	purine ribonucleoside monophosphate metabolic process	1/396	20/1861	0.991876	0.999999	3639233	QCR7	1	0		1	3639233
BP	GO:0051186	cofactor metabolic process	3/396	37/1861	0.991932	0.999999	3647071/3641233/3645211	COX15/CAALFM_C210860CA/HEM15	3	0		3	3647071/3641233/3645211
BP	GO:0090407	organophosphate biosynthetic process	5/396	52/1861	0.992751	0.999999	3638966/3644557/3643784/3641607/3645575	INO1/CHO1/IPK2/CAALFM_C601370WA/GWT1	5	3	3644557/3643784/3645575	2	3638966/3641607
BP	GO:0006351	transcription, DNA-templated	33/396	218/1861	0.994178	0.999999	3641635/3635261/3647664/3641740/3639378/3640990/3635819/3638534/3639254/3644534/3638991/3648000/3639245/3641370/3643511/3636918/3640208/3646988/3643754/3647675/3641886/3637740/3644691/3636640/3642915/3641812/3635666/3646354/3636610/3635788/3634867/3644103/3645016	ZCF18/TEC1/BRG1/ZCF35/RPO41/CAALFM_CR04250WA/CAALFM_C202530WA/ZFU2/POL5/CAALFM_C601920CA/RPO21/ECM22/CAALFM_C602790CA/ZCF29/AFT2/MED17/STB5/FGR27/ZNC1/TBP1/UGA33/CAALFM_C502750CA/WAR1/CAP1/CZF1/CAALFM_C405630WA/ZCF26/ZCF13/CAALFM_C301220WA/CTF1/SFU1/MED18/CAALFM_C400390WA	33	10	3635261/3647664/3641740/3648000/3637740/3642915/3635666/3636610/3634867/3644103	23	3641635/3639378/3640990/3635819/3638534/3639254/3644534/3638991/3639245/3641370/3643511/3636918/3640208/3646988/3643754/3647675/3641886/3644691/3636640/3641812/3646354/3635788/3645016
BP	GO:0097659	nucleic acid-templated transcription	33/396	218/1861	0.994178	0.999999	3641635/3635261/3647664/3641740/3639378/3640990/3635819/3638534/3639254/3644534/3638991/3648000/3639245/3641370/3643511/3636918/3640208/3646988/3643754/3647675/3641886/3637740/3644691/3636640/3642915/3641812/3635666/3646354/3636610/3635788/3634867/3644103/3645016	ZCF18/TEC1/BRG1/ZCF35/RPO41/CAALFM_CR04250WA/CAALFM_C202530WA/ZFU2/POL5/CAALFM_C601920CA/RPO21/ECM22/CAALFM_C602790CA/ZCF29/AFT2/MED17/STB5/FGR27/ZNC1/TBP1/UGA33/CAALFM_C502750CA/WAR1/CAP1/CZF1/CAALFM_C405630WA/ZCF26/ZCF13/CAALFM_C301220WA/CTF1/SFU1/MED18/CAALFM_C400390WA	33	10	3635261/3647664/3641740/3648000/3637740/3642915/3635666/3636610/3634867/3644103	23	3641635/3639378/3640990/3635819/3638534/3639254/3644534/3638991/3639245/3641370/3643511/3636918/3640208/3646988/3643754/3647675/3641886/3644691/3636640/3641812/3646354/3635788/3645016
BP	GO:1902600	proton transmembrane transport	1/396	22/1861	0.994996	0.999999	3646070	STV1	1	0		1	3646070
BP	GO:0032774	RNA biosynthetic process	33/396	220/1861	0.995236	0.999999	3641635/3635261/3647664/3641740/3639378/3640990/3635819/3638534/3639254/3644534/3638991/3648000/3639245/3641370/3643511/3636918/3640208/3646988/3643754/3647675/3641886/3637740/3644691/3636640/3642915/3641812/3635666/3646354/3636610/3635788/3634867/3644103/3645016	ZCF18/TEC1/BRG1/ZCF35/RPO41/CAALFM_CR04250WA/CAALFM_C202530WA/ZFU2/POL5/CAALFM_C601920CA/RPO21/ECM22/CAALFM_C602790CA/ZCF29/AFT2/MED17/STB5/FGR27/ZNC1/TBP1/UGA33/CAALFM_C502750CA/WAR1/CAP1/CZF1/CAALFM_C405630WA/ZCF26/ZCF13/CAALFM_C301220WA/CTF1/SFU1/MED18/CAALFM_C400390WA	33	10	3635261/3647664/3641740/3648000/3637740/3642915/3635666/3636610/3634867/3644103	23	3641635/3639378/3640990/3635819/3638534/3639254/3644534/3638991/3639245/3641370/3643511/3636918/3640208/3646988/3643754/3647675/3641886/3644691/3636640/3641812/3646354/3635788/3645016
BP	GO:0006325	chromatin organization	1/396	23/1861	0.996074	0.999999	30515358	HHO1	1	1	30515358	0
BP	GO:0009150	purine ribonucleotide metabolic process	1/396	24/1861	0.99692	0.999999	3639233	QCR7	1	0		1	3639233
BP	GO:0009259	ribonucleotide metabolic process	1/396	24/1861	0.99692	0.999999	3639233	QCR7	1	0		1	3639233
BP	GO:0034470	ncRNA processing	3/396	42/1861	0.996991	0.999999	3647604/3643778/3646411	CAALFM_C112570CA/SMM1/SEN15	3	3	3647604/3643778/3646411	0
BP	GO:0006396	RNA processing	8/396	80/1861	0.99796	0.999999	3647604/3635700/3644534/3640722/3643778/3643518/3646411/3637975	CAALFM_C112570CA/CAALFM_C401280CA/CAALFM_C601920CA/MRPL3/SMM1/CAALFM_C206800CA/SEN15/CAALFM_C700130WA	8	6	3647604/3635700/3643778/3643518/3646411/3637975	2	3644534/3640722
BP	GO:0006163	purine nucleotide metabolic process	1/396	26/1861	0.998105	0.999999	3639233	QCR7	1	0		1	3639233
BP	GO:0019693	ribose phosphate metabolic process	1/396	26/1861	0.998105	0.999999	3639233	QCR7	1	0		1	3639233
BP	GO:0072521	purine-containing compound metabolic process	1/396	28/1861	0.998835	0.999999	3639233	QCR7	1	0		1	3639233
BP	GO:1901362	organic cyclic compound biosynthetic process	41/396	284/1861	0.999428	0.999999	3641635/3635261/3647664/3647071/3641740/3639378/3640990/3635819/3638534/3639254/3644534/3638991/3648000/3639245/3641370/3643511/3638346/3636918/3641233/3640208/3646988/3643754/3647675/3645211/3641886/3645025/3637740/3647777/3636655/3644691/3636640/3642915/3639181/3641812/3635666/3646354/3636610/3635788/3634867/3644103/3645016	ZCF18/TEC1/BRG1/COX15/ZCF35/RPO41/CAALFM_CR04250WA/CAALFM_C202530WA/ZFU2/POL5/CAALFM_C601920CA/RPO21/ECM22/CAALFM_C602790CA/ZCF29/AFT2/PHA2/MED17/CAALFM_C210860CA/STB5/FGR27/ZNC1/TBP1/HEM15/UGA33/HIS4/CAALFM_C502750CA/HIS3/ERG6/WAR1/CAP1/CZF1/CAALFM_C603240WA/CAALFM_C405630WA/ZCF26/ZCF13/CAALFM_C301220WA/CTF1/SFU1/MED18/CAALFM_C400390WA	41	10	3635261/3647664/3641740/3648000/3637740/3642915/3635666/3636610/3634867/3644103	31	3641635/3647071/3639378/3640990/3635819/3638534/3639254/3644534/3638991/3639245/3641370/3643511/3638346/3636918/3641233/3640208/3646988/3643754/3647675/3645211/3641886/3645025/3647777/3636655/3644691/3636640/3639181/3641812/3646354/3635788/3645016
BP	GO:0019438	aromatic compound biosynthetic process	39/396	277/1861	0.999636	0.999999	3641635/3635261/3647664/3647071/3641740/3639378/3640990/3635819/3638534/3639254/3644534/3638991/3648000/3639245/3641370/3643511/3638346/3636918/3641233/3640208/3646988/3643754/3647675/3645211/3641886/3645025/3637740/3647777/3644691/3636640/3642915/3641812/3635666/3646354/3636610/3635788/3634867/3644103/3645016	ZCF18/TEC1/BRG1/COX15/ZCF35/RPO41/CAALFM_CR04250WA/CAALFM_C202530WA/ZFU2/POL5/CAALFM_C601920CA/RPO21/ECM22/CAALFM_C602790CA/ZCF29/AFT2/PHA2/MED17/CAALFM_C210860CA/STB5/FGR27/ZNC1/TBP1/HEM15/UGA33/HIS4/CAALFM_C502750CA/HIS3/WAR1/CAP1/CZF1/CAALFM_C405630WA/ZCF26/ZCF13/CAALFM_C301220WA/CTF1/SFU1/MED18/CAALFM_C400390WA	39	10	3635261/3647664/3641740/3648000/3637740/3642915/3635666/3636610/3634867/3644103	29	3641635/3647071/3639378/3640990/3635819/3638534/3639254/3644534/3638991/3639245/3641370/3643511/3638346/3636918/3641233/3640208/3646988/3643754/3647675/3645211/3641886/3645025/3647777/3644691/3636640/3641812/3646354/3635788/3645016
BP	GO:0018130	heterocycle biosynthetic process	38/396	278/1861	0.999831	0.999999	3641635/3635261/3647664/3647071/3641740/3639378/3640990/3635819/3638534/3639254/3644534/3638991/3648000/3639245/3641370/3643511/3636918/3641233/3640208/3646988/3643754/3647675/3645211/3641886/3645025/3637740/3647777/3644691/3636640/3642915/3641812/3635666/3646354/3636610/3635788/3634867/3644103/3645016	ZCF18/TEC1/BRG1/COX15/ZCF35/RPO41/CAALFM_CR04250WA/CAALFM_C202530WA/ZFU2/POL5/CAALFM_C601920CA/RPO21/ECM22/CAALFM_C602790CA/ZCF29/AFT2/MED17/CAALFM_C210860CA/STB5/FGR27/ZNC1/TBP1/HEM15/UGA33/HIS4/CAALFM_C502750CA/HIS3/WAR1/CAP1/CZF1/CAALFM_C405630WA/ZCF26/ZCF13/CAALFM_C301220WA/CTF1/SFU1/MED18/CAALFM_C400390WA	38	10	3635261/3647664/3641740/3648000/3637740/3642915/3635666/3636610/3634867/3644103	28	3641635/3647071/3639378/3640990/3635819/3638534/3639254/3644534/3638991/3639245/3641370/3643511/3636918/3641233/3640208/3646988/3643754/3647675/3645211/3641886/3645025/3647777/3644691/3636640/3641812/3646354/3635788/3645016
BP	GO:0055086	nucleobase-containing small molecule metabolic process	2/396	49/1861	0.9999	0.999999	3638426/3639233	PNP1/QCR7	2	1	3638426	1	3639233
BP	GO:0034654	nucleobase-containing compound biosynthetic process	33/396	255/1861	0.999914	0.999999	3641635/3635261/3647664/3641740/3639378/3640990/3635819/3638534/3639254/3644534/3638991/3648000/3639245/3641370/3643511/3636918/3640208/3646988/3643754/3647675/3641886/3637740/3644691/3636640/3642915/3641812/3635666/3646354/3636610/3635788/3634867/3644103/3645016	ZCF18/TEC1/BRG1/ZCF35/RPO41/CAALFM_CR04250WA/CAALFM_C202530WA/ZFU2/POL5/CAALFM_C601920CA/RPO21/ECM22/CAALFM_C602790CA/ZCF29/AFT2/MED17/STB5/FGR27/ZNC1/TBP1/UGA33/CAALFM_C502750CA/WAR1/CAP1/CZF1/CAALFM_C405630WA/ZCF26/ZCF13/CAALFM_C301220WA/CTF1/SFU1/MED18/CAALFM_C400390WA	33	10	3635261/3647664/3641740/3648000/3637740/3642915/3635666/3636610/3634867/3644103	23	3641635/3639378/3640990/3635819/3638534/3639254/3644534/3638991/3639245/3641370/3643511/3636918/3640208/3646988/3643754/3647675/3641886/3644691/3636640/3641812/3646354/3635788/3645016
BP	GO:0016070	RNA metabolic process	49/396	347/1861	0.999933	0.999999	3647604/3640275/3641635/3645124/3636824/3645956/3635261/3647664/3635700/3641740/3639378/3640990/3635819/3638534/3639254/3640285/3644534/3645137/3638991/3640722/3648000/3639245/3641370/3643778/3643511/3636918/3640208/3636398/3646988/3643754/3647675/3641886/3637740/3644691/3641026/3646086/3643518/3636640/3642915/3641812/3635666/3646354/3636610/3635788/3634867/3644103/3646411/3645016/3637975	CAALFM_C112570CA/NAM2/ZCF18/CAALFM_CR03110WA/FRS2/ILS1/TEC1/BRG1/CAALFM_C401280CA/ZCF35/RPO41/CAALFM_CR04250WA/CAALFM_C202530WA/ZFU2/POL5/ALA1/CAALFM_C601920CA/CAALFM_CR03400WA/RPO21/MRPL3/ECM22/CAALFM_C602790CA/ZCF29/SMM1/AFT2/MED17/STB5/MSM1/FGR27/ZNC1/TBP1/UGA33/CAALFM_C502750CA/WAR1/CAALFM_CR04110WA/CAALFM_C600390WA/CAALFM_C206800CA/CAP1/CZF1/CAALFM_C405630WA/ZCF26/ZCF13/CAALFM_C301220WA/CTF1…	49	18	3647604/3636824/3635261/3647664/3635700/3641740/3648000/3643778/3637740/3641026/3643518/3642915/3635666/3636610/3634867/3644103/3646411/3637975	31	3640275/3641635/3645124/3645956/3639378/3640990/3635819/3638534/3639254/3640285/3644534/3645137/3638991/3640722/3639245/3641370/3643511/3636918/3640208/3636398/3646988/3643754/3647675/3641886/3644691/3646086/3636640/3641812/3646354/3635788/3645016
BP	GO:0009117	nucleotide metabolic process	1/396	40/1861	0.999938	0.999999	3639233	QCR7	1	0		1	3639233
BP	GO:0006753	nucleoside phosphate metabolic process	1/396	41/1861	0.999951	0.999999	3639233	QCR7	1	0		1	3639233
BP	GO:0090304	nucleic acid metabolic process	63/396	427/1861	0.999959	0.999999	3638890/3647604/3640275/3641635/3645124/3642966/3636824/3645956/3635261/3647664/3642989/3635700/3641740/3641632/3639378/3640990/3635819/3637836/3638534/3639254/3645324/3640285/3638917/3644534/3645137/3645374/3638991/3640722/3637340/3648000/3639245/3641370/3643778/3643511/3636918/3640208/3636398/3646988/3643754/3647675/3641886/3637740/3644691/3646519/3641026/3646086/3635251/3643518/3636640/3642915…	RFC5/CAALFM_C112570CA/NAM2/ZCF18/CAALFM_CR03110WA/CAALFM_C407010CA/FRS2/ILS1/TEC1/BRG1/RNR1/CAALFM_C401280CA/ZCF35/FPG1/RPO41/CAALFM_CR04250WA/CAALFM_C202530WA/CAALFM_C403230CA/ZFU2/POL5/CAS1/ALA1/CAALFM_CR10180WA/CAALFM_C601920CA/CAALFM_CR03400WA/RAD2/RPO21/MRPL3/RAD32/ECM22/CAALFM_C602790CA/ZCF29/SMM1/AFT2/MED17/STB5/MSM1/FGR27/ZNC1/TBP1/UGA33/CAALFM_C502750CA/WAR1/CAALFM_C406020CA/CAALFM_CR041…	63	21	3638890/3647604/3636824/3635261/3647664/3635700/3641740/3645324/3638917/3648000/3643778/3637740/3641026/3643518/3642915/3635666/3636610/3634867/3644103/3646411/3637975	42	3640275/3641635/3645124/3642966/3645956/3642989/3641632/3639378/3640990/3635819/3637836/3638534/3639254/3640285/3644534/3645137/3645374/3638991/3640722/3637340/3639245/3641370/3643511/3636918/3640208/3636398/3646988/3643754/3647675/3641886/3644691/3646519/3646086/3635251/3636640/3643106/3641812/3646354/3635788/3639681/3643294/3645016
BP	GO:0006139	nucleobase-containing compound metabolic process	66/396	478/1861	0.999999	0.999999	3638890/3647604/3640275/3641635/3645124/3642966/3636824/3645956/3635261/3647664/3642989/3635700/3641740/3641632/3639378/3640990/3635819/3637836/3638534/3639254/3645324/3640285/3638917/3644534/3645137/3645374/3638991/3638426/3640722/3637340/3648000/3639245/3641370/3643778/3639233/3643511/3636918/3640208/3636398/3646988/3643754/3647675/3641886/3637740/3644691/3638014/3646519/3641026/3646086/3635251…	RFC5/CAALFM_C112570CA/NAM2/ZCF18/CAALFM_CR03110WA/CAALFM_C407010CA/FRS2/ILS1/TEC1/BRG1/RNR1/CAALFM_C401280CA/ZCF35/FPG1/RPO41/CAALFM_CR04250WA/CAALFM_C202530WA/CAALFM_C403230CA/ZFU2/POL5/CAS1/ALA1/CAALFM_CR10180WA/CAALFM_C601920CA/CAALFM_CR03400WA/RAD2/RPO21/PNP1/MRPL3/RAD32/ECM22/CAALFM_C602790CA/ZCF29/SMM1/QCR7/AFT2/MED17/STB5/MSM1/FGR27/ZNC1/TBP1/UGA33/CAALFM_C502750CA/WAR1/RAD3/CAALFM_C406020…	66	22	3638890/3647604/3636824/3635261/3647664/3635700/3641740/3645324/3638917/3638426/3648000/3643778/3637740/3641026/3643518/3642915/3635666/3636610/3634867/3644103/3646411/3637975	44	3640275/3641635/3645124/3642966/3645956/3642989/3641632/3639378/3640990/3635819/3637836/3638534/3639254/3640285/3644534/3645137/3645374/3638991/3640722/3637340/3639245/3641370/3639233/3643511/3636918/3640208/3636398/3646988/3643754/3647675/3641886/3644691/3638014/3646519/3646086/3635251/3636640/3643106/3641812/3646354/3635788/3639681/3643294/3645016
CC	GO:0005840	ribosome	42/209	82/970	4.61e-10	3.83e-08	30515338/3647558/3646039/30515335/3636850/30515328/3642934/3640224/3647719/3636659/3636841/30515208/3639724/3647063/3635257/3637400/3640242/3643347/3640303/3643678/3638020/3639551/3637057/3639723/30515267/3636924/30515014/3639497/3636573/3639338/30515006/3637953/3637954/3641383/3646057/3640168/30515041/3635615/3643513/3635787/30515207/30514969	RPL25/RPL23A/MRPL8/RPL32/RPL10/RPS13/UBI3/MRP20/RPL3/RPL12/RPL13/RPS19A/MRPL6/CAALFM_C501550CA/RPL19A/RPL21A/RPS21/RPL4B/CAALFM_C603730CA/YST1/CAALFM_C701020CA/RPS22A/RPL5/CAALFM_CR00490WA/CAALFM_C404390WA/RPS1/CAALFM_C106890CA/MRPL19/RPS7A/RPL16A/RPS14B/RPS18/YML6/CAALFM_C703000CA/CAALFM_CR07320CA/CAALFM_CR01370CA/RPL42/RPL20B/CAALFM_C207190CA/RPS26A/RPL35/CAALFM_C102330CA	42	0		42	30515338/3647558/3646039/30515335/3636850/30515328/3642934/3640224/3647719/3636659/3636841/30515208/3639724/3647063/3635257/3637400/3640242/3643347/3640303/3643678/3638020/3639551/3637057/3639723/30515267/3636924/30515014/3639497/3636573/3639338/30515006/3637953/3637954/3641383/3646057/3640168/30515041/3635615/3643513/3635787/30515207/30514969
CC	GO:0043228	non-membrane-bounded organelle	57/209	152/970	6.15e-07	1.7e-05	30515338/3647558/3646039/30515335/3635656/3647404/3636850/30515358/3639254/3643783/30515328/3642934/3644716/3640224/3647719/3636659/3636841/30515208/3639724/3647063/3635257/3647326/3637400/3635196/3640242/3643347/3640303/3643678/3638020/3638037/3639551/3644707/3637057/3639723/30515267/3636924/30515014/3639497/3636573/3645659/3646043/3640732/3639338/30515006/3644715/3637953/3637954/3641383/3646057…	RPL25/RPL23A/MRPL8/RPL32/ASK1/MYO5/RPL10/HHO1/POL5/MTW1/RPS13/UBI3/CAALFM_C104180WA/MRP20/RPL3/RPL12/RPL13/RPS19A/MRPL6/CAALFM_C501550CA/RPL19A/HHT2/RPL21A/CAALFM_C304690CA/RPS21/RPL4B/CAALFM_C603730CA/YST1/CAALFM_C701020CA/DCC1/RPS22A/HHT21/RPL5/CAALFM_CR00490WA/CAALFM_C404390WA/RPS1/CAALFM_C106890CA/MRPL19/RPS7A/HTB1/ARC15/CAALFM_C108150CA/RPL16A/RPS14B/HTA2/RPS18/YML6/CAALFM_C703000CA/CAALFM_C…	57	14	3635656/3647404/30515358/3643783/3644716/3647326/3635196/3638037/3644707/3645659/3646043/3640732/3644715/3638322	43	30515338/3647558/3646039/30515335/3636850/3639254/30515328/3642934/3640224/3647719/3636659/3636841/30515208/3639724/3647063/3635257/3637400/3640242/3643347/3640303/3643678/3638020/3639551/3637057/3639723/30515267/3636924/30515014/3639497/3636573/3639338/30515006/3637953/3637954/3641383/3646057/3640168/30515041/3635615/3643513/3635787/30515207/30514969
CC	GO:0043232	intracellular non-membrane-bounded organelle	57/209	152/970	6.15e-07	1.7e-05	30515338/3647558/3646039/30515335/3635656/3647404/3636850/30515358/3639254/3643783/30515328/3642934/3644716/3640224/3647719/3636659/3636841/30515208/3639724/3647063/3635257/3647326/3637400/3635196/3640242/3643347/3640303/3643678/3638020/3638037/3639551/3644707/3637057/3639723/30515267/3636924/30515014/3639497/3636573/3645659/3646043/3640732/3639338/30515006/3644715/3637953/3637954/3641383/3646057…	RPL25/RPL23A/MRPL8/RPL32/ASK1/MYO5/RPL10/HHO1/POL5/MTW1/RPS13/UBI3/CAALFM_C104180WA/MRP20/RPL3/RPL12/RPL13/RPS19A/MRPL6/CAALFM_C501550CA/RPL19A/HHT2/RPL21A/CAALFM_C304690CA/RPS21/RPL4B/CAALFM_C603730CA/YST1/CAALFM_C701020CA/DCC1/RPS22A/HHT21/RPL5/CAALFM_CR00490WA/CAALFM_C404390WA/RPS1/CAALFM_C106890CA/MRPL19/RPS7A/HTB1/ARC15/CAALFM_C108150CA/RPL16A/RPS14B/HTA2/RPS18/YML6/CAALFM_C703000CA/CAALFM_C…	57	14	3635656/3647404/30515358/3643783/3644716/3647326/3635196/3638037/3644707/3645659/3646043/3640732/3644715/3638322	43	30515338/3647558/3646039/30515335/3636850/3639254/30515328/3642934/3640224/3647719/3636659/3636841/30515208/3639724/3647063/3635257/3637400/3640242/3643347/3640303/3643678/3638020/3639551/3637057/3639723/30515267/3636924/30515014/3639497/3636573/3639338/30515006/3637953/3637954/3641383/3646057/3640168/30515041/3635615/3643513/3635787/30515207/30514969
CC	GO:1990904	ribonucleoprotein complex	42/209	103/970	2.16e-06	4.49e-05	30515338/3647558/3646039/30515335/3636850/30515328/3642934/3640224/3647719/3636659/3636841/30515208/3639724/3647063/3635257/3637400/3640242/3643347/3640303/3643678/3638020/3639551/3637057/3639723/30515267/3636924/30515014/3639497/3636573/3639338/30515006/3637953/3637954/3641383/3646057/3640168/30515041/3635615/3643513/3635787/30515207/30514969	RPL25/RPL23A/MRPL8/RPL32/RPL10/RPS13/UBI3/MRP20/RPL3/RPL12/RPL13/RPS19A/MRPL6/CAALFM_C501550CA/RPL19A/RPL21A/RPS21/RPL4B/CAALFM_C603730CA/YST1/CAALFM_C701020CA/RPS22A/RPL5/CAALFM_CR00490WA/CAALFM_C404390WA/RPS1/CAALFM_C106890CA/MRPL19/RPS7A/RPL16A/RPS14B/RPS18/YML6/CAALFM_C703000CA/CAALFM_CR07320CA/CAALFM_CR01370CA/RPL42/RPL20B/CAALFM_C207190CA/RPS26A/RPL35/CAALFM_C102330CA	42	0		42	30515338/3647558/3646039/30515335/3636850/30515328/3642934/3640224/3647719/3636659/3636841/30515208/3639724/3647063/3635257/3637400/3640242/3643347/3640303/3643678/3638020/3639551/3637057/3639723/30515267/3636924/30515014/3639497/3636573/3639338/30515006/3637953/3637954/3641383/3646057/3640168/30515041/3635615/3643513/3635787/30515207/30514969
CC	GO:0044444	cytoplasmic part	66/209	208/970	6.72e-05	0.00111538	3646288/30515338/3642793/3643103/3640307/3647558/3641607/3646039/30515335/3637401/3634810/3636850/3642019/3645870/3636513/30515328/3636968/3635671/3642934/3640224/3647719/3636659/3636841/30515208/3639724/3647063/3635257/3647650/3639233/3637400/3643674/3641183/3641898/3640242/3643347/3640303/3643678/3638020/3639551/3644698/3636817/3647078/3637057/3639723/30515267/3636834/3636924/30515014/3643928/3…	PEX11/RPL25/CAALFM_C406440CA/MAM33/ORM1/RPL23A/CAALFM_C601370WA/MRPL8/RPL32/CAALFM_C203800CA/ERO1/RPL10/CAALFM_C112280CA/SEC27/SRP101/RPS13/TOM40/CYT2/UBI3/MRP20/RPL3/RPL12/RPL13/RPS19A/MRPL6/CAALFM_C501550CA/RPL19A/TOM22/QCR7/RPL21A/DIE2/CAALFM_C404180CA/PHO88/RPS21/RPL4B/CAALFM_C603730CA/YST1/CAALFM_C701020CA/RPS22A/POR1/TOM20/SEC8/RPL5/CAALFM_CR00490WA/CAALFM_C404390WA/CAALFM_C102960CA/RPS1/CA…	66	8	3642793/3637401/3634810/3643674/3644698/3636834/3643928/3636598	58	3646288/30515338/3643103/3640307/3647558/3641607/3646039/30515335/3636850/3642019/3645870/3636513/30515328/3636968/3635671/3642934/3640224/3647719/3636659/3636841/30515208/3639724/3647063/3635257/3647650/3639233/3637400/3641183/3641898/3640242/3643347/3640303/3643678/3638020/3639551/3636817/3647078/3637057/3639723/30515267/3636924/30515014/3639497/3636573/30515038/3639338/30515006/3637953/3637954…
CC	GO:0000786	nucleosome	7/209	10/970	0.00130236	0.0166286	30515358/3644716/3647326/3644707/3645659/3644715/3638322	HHO1/CAALFM_C104180WA/HHT2/HHT21/HTB1/HTA2/HTA3	7	7	30515358/3644716/3647326/3644707/3645659/3644715/3638322	0
CC	GO:0005737	cytoplasm	70/209	244/970	0.00140241	0.0166286	3646288/30515338/3642793/3643103/3640307/3647558/3641607/3646039/30515335/3637401/3634810/3636850/3642019/3645870/3636513/30515328/3640285/3636968/3635671/3638390/3642934/3640224/3647719/3636659/3636841/30515208/3639724/3647063/3635257/3647650/3639233/3637400/3643674/3641183/3641898/3640242/3643347/3640303/3643678/3638020/3639551/3644698/3636817/3647078/3637057/3639723/30515267/3636834/3636924/36…	PEX11/RPL25/CAALFM_C406440CA/MAM33/ORM1/RPL23A/CAALFM_C601370WA/MRPL8/RPL32/CAALFM_C203800CA/ERO1/RPL10/CAALFM_C112280CA/SEC27/SRP101/RPS13/ALA1/TOM40/CYT2/DTD2/UBI3/MRP20/RPL3/RPL12/RPL13/RPS19A/MRPL6/CAALFM_C501550CA/RPL19A/TOM22/QCR7/RPL21A/DIE2/CAALFM_C404180CA/PHO88/RPS21/RPL4B/CAALFM_C603730CA/YST1/CAALFM_C701020CA/RPS22A/POR1/TOM20/SEC8/RPL5/CAALFM_CR00490WA/CAALFM_C404390WA/CAALFM_C102960…	70	8	3642793/3637401/3634810/3643674/3644698/3636834/3643928/3636598	62	3646288/30515338/3643103/3640307/3647558/3641607/3646039/30515335/3636850/3642019/3645870/3636513/30515328/3640285/3636968/3635671/3638390/3642934/3640224/3647719/3636659/3636841/30515208/3639724/3647063/3635257/3647650/3639233/3637400/3641183/3641898/3640242/3643347/3640303/3643678/3638020/3639551/3636817/3647078/3637057/3639723/30515267/3636924/3647897/30515014/3634819/3639497/3636573/30515038/…
CC	GO:0032993	protein-DNA complex	7/209	11/970	0.00292971	0.0270184	30515358/3644716/3647326/3644707/3645659/3644715/3638322	HHO1/CAALFM_C104180WA/HHT2/HHT21/HTB1/HTA2/HTA3	7	7	30515358/3644716/3647326/3644707/3645659/3644715/3638322	0
CC	GO:0044815	DNA packaging complex	7/209	11/970	0.00292971	0.0270184	30515358/3644716/3647326/3644707/3645659/3644715/3638322	HHO1/CAALFM_C104180WA/HHT2/HHT21/HTB1/HTA2/HTA3	7	7	30515358/3644716/3647326/3644707/3645659/3644715/3638322	0
CC	GO:0000785	chromatin	7/209	14/970	0.0167511	0.139034	30515358/3644716/3647326/3644707/3645659/3644715/3638322	HHO1/CAALFM_C104180WA/HHT2/HHT21/HTB1/HTA2/HTA3	7	7	30515358/3644716/3647326/3644707/3645659/3644715/3638322	0
CC	GO:0016021	integral component of membrane	58/209	235/970	0.106208	0.734607	3646567/3642634/3640956/3639260/3638048/3646404/3646288/3635265/3639530/3642793/3640307/3634898/3641625/3643318/3638884/3635863/3647071/3645969/3645575/3637401/3636793/3642635/3640394/3642288/3646284/3637036/3646562/3637977/3638844/3637827/3638948/3640244/3647141/3634844/3642298/3641209/3640941/3641358/3647532/3639728/3643440/3645976/3640952/3636420/3637919/3641617/3643928/3644777/3647466/3645420…	RTA2/GIT3/TPO4/MDR1/HGT12/HGT9/PEX11/CDR2/CAALFM_C106860WA/CAALFM_C406440CA/ORM1/CAALFM_C109220WA/CAALFM_C601870CA/FTR1/CAALFM_C200700WA/HGT20/COX15/NAG3/GWT1/CAALFM_C203800CA/CAALFM_C102410CA/GIT4/ATO10/HST6/ATM1/CAALFM_C701600WA/GIT1/CAALFM_C700270WA/CAALFM_C201340WA/TNA1/CAALFM_CR10800CA/CAALFM_C603540WA/NHX1/TVP18/CAALFM_C207760WA/CAALFM_C210720CA/QDR1/NIK1/CAALFM_C105010CA/CAALFM_CR00420WA/I…	58	31	3646567/3642634/3640956/3646404/3635265/3639530/3642793/3634898/3635863/3645575/3637401/3636793/3642635/3640394/3642288/3646562/3638844/3634844/3642298/3641209/3647532/3639728/3643440/3640952/3637919/3643928/3645420/3641717/3638891/3647090/3638833	27	3639260/3638048/3646288/3640307/3641625/3643318/3638884/3647071/3645969/3646284/3637036/3637977/3637827/3638948/3640244/3647141/3640941/3641358/3645976/3636420/3641617/3644777/3647466/3638944/3643769/3645216/3646621
CC	GO:0031224	intrinsic component of membrane	58/209	235/970	0.106208	0.734607	3646567/3642634/3640956/3639260/3638048/3646404/3646288/3635265/3639530/3642793/3640307/3634898/3641625/3643318/3638884/3635863/3647071/3645969/3645575/3637401/3636793/3642635/3640394/3642288/3646284/3637036/3646562/3637977/3638844/3637827/3638948/3640244/3647141/3634844/3642298/3641209/3640941/3641358/3647532/3639728/3643440/3645976/3640952/3636420/3637919/3641617/3643928/3644777/3647466/3645420…	RTA2/GIT3/TPO4/MDR1/HGT12/HGT9/PEX11/CDR2/CAALFM_C106860WA/CAALFM_C406440CA/ORM1/CAALFM_C109220WA/CAALFM_C601870CA/FTR1/CAALFM_C200700WA/HGT20/COX15/NAG3/GWT1/CAALFM_C203800CA/CAALFM_C102410CA/GIT4/ATO10/HST6/ATM1/CAALFM_C701600WA/GIT1/CAALFM_C700270WA/CAALFM_C201340WA/TNA1/CAALFM_CR10800CA/CAALFM_C603540WA/NHX1/TVP18/CAALFM_C207760WA/CAALFM_C210720CA/QDR1/NIK1/CAALFM_C105010CA/CAALFM_CR00420WA/I…	58	31	3646567/3642634/3640956/3646404/3635265/3639530/3642793/3634898/3635863/3645575/3637401/3636793/3642635/3640394/3642288/3646562/3638844/3634844/3642298/3641209/3647532/3639728/3643440/3640952/3637919/3643928/3645420/3641717/3638891/3647090/3638833	27	3639260/3638048/3646288/3640307/3641625/3643318/3638884/3647071/3645969/3646284/3637036/3637977/3637827/3638948/3640244/3647141/3640941/3641358/3645976/3636420/3641617/3644777/3647466/3638944/3643769/3645216/3646621
CC	GO:0031984	organelle subcompartment	8/209	24/970	0.122975	0.785147	3642793/3640307/3641607/3637401/3636513/3643674/3641183/3643928	CAALFM_C406440CA/ORM1/CAALFM_C601370WA/CAALFM_C203800CA/SRP101/DIE2/CAALFM_C404180CA/CAALFM_C210200WA	8	4	3642793/3637401/3643674/3643928	4	3640307/3641607/3636513/3641183
CC	GO:0044427	chromosomal part	12/209	43/970	0.195517	1	3635656/30515358/3643783/3644716/3647326/3635196/3638037/3644707/3645659/3640732/3644715/3638322	ASK1/HHO1/MTW1/CAALFM_C104180WA/HHT2/CAALFM_C304690CA/DCC1/HHT21/HTB1/CAALFM_C108150CA/HTA2/HTA3	12	12	3635656/30515358/3643783/3644716/3647326/3635196/3638037/3644707/3645659/3640732/3644715/3638322	0
CC	GO:0016020	membrane	106/209	465/970	0.203246	1	3646567/3642634/3640956/3644557/3639260/3638048/3642303/3646404/3641727/3646288/3635265/3639028/3639530/3642793/3640307/3640175/3639870/3634898/3641607/3641625/3643318/3641721/3638884/3642910/3635863/3647071/3636497/3645969/3646425/3645575/3637401/3636793/3642635/3640394/3642288/3646284/3637036/3646562/3637977/3645870/3636513/3638844/3636968/3636547/3637827/3638948/3647066/3640244/3639894/3637426…	RTA2/GIT3/TPO4/CHO1/MDR1/HGT12/YVC1/HGT9/RCT1/PEX11/CDR2/CAALFM_CR09920WA/CAALFM_C106860WA/CAALFM_C406440CA/ORM1/CCH1/CAALFM_C106000WA/CAALFM_C109220WA/CAALFM_C601370WA/CAALFM_C601870CA/FTR1/SAM50/CAALFM_C200700WA/ARR3/HGT20/COX15/SDH4/NAG3/KTR4/GWT1/CAALFM_C203800CA/CAALFM_C102410CA/GIT4/ATO10/HST6/ATM1/CAALFM_C701600WA/GIT1/CAALFM_C700270WA/SEC27/SRP101/CAALFM_C201340WA/TOM40/MRV4/TNA1/CAALFM_C…	106	58	3646567/3642634/3640956/3644557/3642303/3646404/3641727/3635265/3639028/3639530/3642793/3640175/3639870/3634898/3641721/3635863/3646425/3645575/3637401/3636793/3642635/3640394/3642288/3646562/3638844/3636547/3639894/3647667/3634844/3642298/3641209/3643674/3635752/3645270/3647532/3639728/3647791/3643440/3644698/3636834/3640952/3637919/3643928/3636545/3645420/3641717/3646239/3638891/3639546/3643822…	48	3639260/3638048/3646288/3640307/3641607/3641625/3643318/3638884/3642910/3647071/3636497/3645969/3646284/3637036/3637977/3645870/3636513/3636968/3637827/3638948/3647066/3640244/3637426/3647141/3647650/3639233/3641183/3640941/3641358/3645976/3636817/3645017/3636420/3641617/3643335/3644777/3647466/3638944/3637382/3643769/3646070/3639344/3645443/3645216/3646621/3640093/3645364/3645022
CC	GO:0032991	protein-containing complex	75/209	328/970	0.262767	1	3647604/30515338/3647558/3646039/30515335/3643318/3635656/3647404/3636850/30515358/3645870/3636513/30515328/3644534/3635164/3636500/3642934/3644716/3640224/3647719/3636659/3636841/30515208/3639724/3647063/3635257/3647326/3639233/3637400/3636918/3635196/3640242/3643347/3645874/3640303/3643678/3638020/3638037/3644584/3639551/3644707/3636817/3647078/3637057/3639723/30515267/3636924/30515014/3643928/…	CAALFM_C112570CA/RPL25/RPL23A/MRPL8/RPL32/FTR1/ASK1/MYO5/RPL10/HHO1/SEC27/SRP101/RPS13/CAALFM_C601920CA/CAALFM_C304970CA/PRE1/UBI3/CAALFM_C104180WA/MRP20/RPL3/RPL12/RPL13/RPS19A/MRPL6/CAALFM_C501550CA/RPL19A/HHT2/QCR7/RPL21A/MED17/CAALFM_C304690CA/RPS21/RPL4B/CAALFM_C602300CA/CAALFM_C603730CA/YST1/CAALFM_C701020CA/DCC1/CAALFM_C102160WA/RPS22A/HHT21/TOM20/SEC8/RPL5/CAALFM_CR00490WA/CAALFM_C404390W…	75	19	3647604/3635656/3647404/30515358/3644716/3647326/3635196/3638037/3644584/3644707/3643928/3638856/3645659/3646043/3640732/3644715/3645567/3644103/3638322	56	30515338/3647558/3646039/30515335/3643318/3636850/3645870/3636513/30515328/3644534/3635164/3636500/3642934/3640224/3647719/3636659/3636841/30515208/3639724/3647063/3635257/3639233/3637400/3636918/3640242/3643347/3645874/3640303/3643678/3638020/3639551/3636817/3647078/3637057/3639723/30515267/3636924/30515014/3639497/3636573/3646070/3639338/30515006/3637953/3637954/3641383/3646057/3640168/30515041…
CC	GO:0005739	mitochondrion	11/209	42/970	0.281274	1	3643103/3642019/3636968/3635671/3647650/3639233/3644698/3636817/3636834/30515038/3646057	MAM33/CAALFM_C112280CA/TOM40/CYT2/TOM22/QCR7/POR1/TOM20/CAALFM_C102960CA/PET100/CAALFM_CR07320CA	11	2	3644698/3636834	9	3643103/3642019/3636968/3635671/3647650/3639233/3636817/30515038/3646057
CC	GO:0098588	bounding membrane of organelle	8/209	30/970	0.309191	1	3646288/3642793/3637401/3636513/3636968/3647650/3644698/3636817	PEX11/CAALFM_C406440CA/CAALFM_C203800CA/SRP101/TOM40/TOM22/POR1/TOM20	8	3	3642793/3637401/3644698	5	3646288/3636513/3636968/3647650/3636817
CC	GO:0005789	endoplasmic reticulum membrane	6/209	22/970	0.330738	1	3640307/3641607/3636513/3643674/3641183/3643928	ORM1/CAALFM_C601370WA/SRP101/DIE2/CAALFM_C404180CA/CAALFM_C210200WA	6	2	3643674/3643928	4	3640307/3641607/3636513/3641183
CC	GO:0042175	nuclear outer membrane-endoplasmic reticulum membrane network	6/209	22/970	0.330738	1	3640307/3641607/3636513/3643674/3641183/3643928	ORM1/CAALFM_C601370WA/SRP101/DIE2/CAALFM_C404180CA/CAALFM_C210200WA	6	2	3643674/3643928	4	3640307/3641607/3636513/3641183
CC	GO:0098827	endoplasmic reticulum subcompartment	6/209	22/970	0.330738	1	3640307/3641607/3636513/3643674/3641183/3643928	ORM1/CAALFM_C601370WA/SRP101/DIE2/CAALFM_C404180CA/CAALFM_C210200WA	6	2	3643674/3643928	4	3640307/3641607/3636513/3641183
CC	GO:0044425	membrane part	67/209	297/970	0.333663	1	3646567/3642634/3640956/3639260/3638048/3646404/3646288/3635265/3639530/3642793/3640307/3634898/3641607/3641625/3643318/3638884/3635863/3647071/3645969/3645575/3637401/3636793/3642635/3640394/3642288/3646284/3637036/3646562/3637977/3645870/3636513/3638844/3637827/3638948/3640244/3647141/3634844/3642298/3641209/3639233/3643674/3641183/3640941/3641358/3647532/3639728/3643440/3645976/3636817/3640952…	RTA2/GIT3/TPO4/MDR1/HGT12/HGT9/PEX11/CDR2/CAALFM_C106860WA/CAALFM_C406440CA/ORM1/CAALFM_C109220WA/CAALFM_C601370WA/CAALFM_C601870CA/FTR1/CAALFM_C200700WA/HGT20/COX15/NAG3/GWT1/CAALFM_C203800CA/CAALFM_C102410CA/GIT4/ATO10/HST6/ATM1/CAALFM_C701600WA/GIT1/CAALFM_C700270WA/SEC27/SRP101/CAALFM_C201340WA/TNA1/CAALFM_CR10800CA/CAALFM_C603540WA/NHX1/TVP18/CAALFM_C207760WA/CAALFM_C210720CA/QCR7/DIE2/CAALF…	67	33	3646567/3642634/3640956/3646404/3635265/3639530/3642793/3634898/3635863/3645575/3637401/3636793/3642635/3640394/3642288/3646562/3638844/3634844/3642298/3641209/3643674/3647532/3639728/3643440/3640952/3637919/3643928/3645420/3641717/3638891/3647090/3645567/3638833	34	3639260/3638048/3646288/3640307/3641607/3641625/3643318/3638884/3647071/3645969/3646284/3637036/3637977/3645870/3636513/3637827/3638948/3640244/3647141/3639233/3641183/3640941/3641358/3645976/3636817/3636420/3641617/3644777/3647466/3638944/3643769/3646070/3645216/3646621
CC	GO:0005783	endoplasmic reticulum	8/209	31/970	0.345292	1	3640307/3641607/3634810/3636513/3643674/3641183/3641898/3643928	ORM1/CAALFM_C601370WA/ERO1/SRP101/DIE2/CAALFM_C404180CA/PHO88/CAALFM_C210200WA	8	3	3634810/3643674/3643928	5	3640307/3641607/3636513/3641183/3641898
CC	GO:0044432	endoplasmic reticulum part	6/209	23/970	0.373763	1	3640307/3641607/3636513/3643674/3641183/3643928	ORM1/CAALFM_C601370WA/SRP101/DIE2/CAALFM_C404180CA/CAALFM_C210200WA	6	2	3643674/3643928	4	3640307/3641607/3636513/3641183
CC	GO:0044429	mitochondrial part	8/209	34/970	0.455545	1	3643103/3636968/3647650/3639233/3644698/3636817/3636834/3646057	MAM33/TOM40/TOM22/QCR7/POR1/TOM20/CAALFM_C102960CA/CAALFM_CR07320CA	8	2	3644698/3636834	6	3643103/3636968/3647650/3639233/3636817/3646057
CC	GO:0000775	chromosome, centromeric region	4/209	16/970	0.464008	1	3635656/3643783/3635196/3640732	ASK1/MTW1/CAALFM_C304690CA/CAALFM_C108150CA	4	4	3635656/3643783/3635196/3640732	0
CC	GO:0005694	chromosome	12/209	53/970	0.477294	1	3635656/30515358/3643783/3644716/3647326/3635196/3638037/3644707/3645659/3640732/3644715/3638322	ASK1/HHO1/MTW1/CAALFM_C104180WA/HHT2/CAALFM_C304690CA/DCC1/HHT21/HTB1/CAALFM_C108150CA/HTA2/HTA3	12	12	3635656/30515358/3643783/3644716/3647326/3635196/3638037/3644707/3645659/3640732/3644715/3638322	0
CC	GO:0043226	organelle	102/209	470/970	0.485363	1	3646288/3641635/30515338/3642793/3643103/3640307/3647558/3641607/3646039/30515335/3635656/3647404/3641740/3637401/3634810/3636850/3638534/3642019/30515358/3639254/3643783/3636513/30515328/3636968/3635671/3644534/3642934/3644716/3640224/3647719/3636659/3636841/30515208/3639724/3647063/3648000/3635257/3647326/3641370/3647650/3639233/3637400/3643674/3636918/3641183/3635196/3641898/3640242/3643347/36…	PEX11/ZCF18/RPL25/CAALFM_C406440CA/MAM33/ORM1/RPL23A/CAALFM_C601370WA/MRPL8/RPL32/ASK1/MYO5/ZCF35/CAALFM_C203800CA/ERO1/RPL10/ZFU2/CAALFM_C112280CA/HHO1/POL5/MTW1/SRP101/RPS13/TOM40/CYT2/CAALFM_C601920CA/UBI3/CAALFM_C104180WA/MRP20/RPL3/RPL12/RPL13/RPS19A/MRPL6/CAALFM_C501550CA/ECM22/RPL19A/HHT2/ZCF29/TOM22/QCR7/RPL21A/DIE2/MED17/CAALFM_C404180CA/CAALFM_C304690CA/PHO88/RPS21/RPL4B/CAALFM_C602300C…	102	30	3642793/3635656/3647404/3641740/3637401/3634810/30515358/3643783/3644716/3648000/3647326/3643674/3635196/3638037/3644707/3644698/3636834/3643928/3638856/3645659/3646043/3643735/3642915/3640732/3644715/3635666/3636610/3636598/3644103/3638322	72	3646288/3641635/30515338/3643103/3640307/3647558/3641607/3646039/30515335/3636850/3638534/3642019/3639254/3636513/30515328/3636968/3635671/3644534/3642934/3640224/3647719/3636659/3636841/30515208/3639724/3647063/3635257/3641370/3647650/3639233/3637400/3636918/3641183/3641898/3640242/3643347/3645874/3640208/3640303/3643678/3638020/3646988/3643754/3639551/3641886/3636817/3637057/3639723/30515267/36…
CC	GO:0043229	intracellular organelle	102/209	470/970	0.485363	1	3646288/3641635/30515338/3642793/3643103/3640307/3647558/3641607/3646039/30515335/3635656/3647404/3641740/3637401/3634810/3636850/3638534/3642019/30515358/3639254/3643783/3636513/30515328/3636968/3635671/3644534/3642934/3644716/3640224/3647719/3636659/3636841/30515208/3639724/3647063/3648000/3635257/3647326/3641370/3647650/3639233/3637400/3643674/3636918/3641183/3635196/3641898/3640242/3643347/36…	PEX11/ZCF18/RPL25/CAALFM_C406440CA/MAM33/ORM1/RPL23A/CAALFM_C601370WA/MRPL8/RPL32/ASK1/MYO5/ZCF35/CAALFM_C203800CA/ERO1/RPL10/ZFU2/CAALFM_C112280CA/HHO1/POL5/MTW1/SRP101/RPS13/TOM40/CYT2/CAALFM_C601920CA/UBI3/CAALFM_C104180WA/MRP20/RPL3/RPL12/RPL13/RPS19A/MRPL6/CAALFM_C501550CA/ECM22/RPL19A/HHT2/ZCF29/TOM22/QCR7/RPL21A/DIE2/MED17/CAALFM_C404180CA/CAALFM_C304690CA/PHO88/RPS21/RPL4B/CAALFM_C602300C…	102	30	3642793/3635656/3647404/3641740/3637401/3634810/30515358/3643783/3644716/3648000/3647326/3643674/3635196/3638037/3644707/3644698/3636834/3643928/3638856/3645659/3646043/3643735/3642915/3640732/3644715/3635666/3636610/3636598/3644103/3638322	72	3646288/3641635/30515338/3643103/3640307/3647558/3641607/3646039/30515335/3636850/3638534/3642019/3639254/3636513/30515328/3636968/3635671/3644534/3642934/3640224/3647719/3636659/3636841/30515208/3639724/3647063/3635257/3641370/3647650/3639233/3637400/3636918/3641183/3641898/3640242/3643347/3645874/3640208/3640303/3643678/3638020/3646988/3643754/3639551/3641886/3636817/3637057/3639723/30515267/36…
CC	GO:0098687	chromosomal region	4/209	17/970	0.515959	1	3635656/3643783/3635196/3640732	ASK1/MTW1/CAALFM_C304690CA/CAALFM_C108150CA	4	4	3635656/3643783/3635196/3640732	0
CC	GO:0005839	proteasome core complex	3/209	14/970	0.609638	1	3636500/3636957/30515395	PRE1/PRE10/PRE6	3	0		3	3636500/3636957/30515395
CC	GO:0031966	mitochondrial membrane	6/209	29/970	0.619691	1	3636968/3647650/3639233/3644698/3636817/3636834	TOM40/TOM22/QCR7/POR1/TOM20/CAALFM_C102960CA	6	2	3644698/3636834	4	3636968/3647650/3639233/3636817
CC	GO:0005740	mitochondrial envelope	6/209	30/970	0.655317	1	3636968/3647650/3639233/3644698/3636817/3636834	TOM40/TOM22/QCR7/POR1/TOM20/CAALFM_C102960CA	6	2	3644698/3636834	4	3636968/3647650/3639233/3636817
CC	GO:0000502	proteasome complex	3/209	15/970	0.659487	1	3636500/3636957/30515395	PRE1/PRE10/PRE6	3	0		3	3636500/3636957/30515395
CC	GO:0000776	kinetochore	3/209	15/970	0.659487	1	3635656/3635196/3640732	ASK1/CAALFM_C304690CA/CAALFM_C108150CA	3	3	3635656/3635196/3640732	0
CC	GO:1905369	endopeptidase complex	3/209	15/970	0.659487	1	3636500/3636957/30515395	PRE1/PRE10/PRE6	3	0		3	3636500/3636957/30515395
CC	GO:0015629	actin cytoskeleton	2/209	10/970	0.67042	1	3647404/3646043	MYO5/ARC15	2	2	3647404/3646043	0
CC	GO:0098805	whole membrane	5/209	26/970	0.690997	1	3646288/3636968/3647650/3644698/3636817	PEX11/TOM40/TOM22/POR1/TOM20	5	1	3644698	4	3646288/3636968/3647650/3636817
CC	GO:0012505	endomembrane system	12/209	62/970	0.717481	1	3642793/3640307/3641607/3637401/3634810/3636513/3643674/3641183/3641898/3643928/3638856/3645567	CAALFM_C406440CA/ORM1/CAALFM_C601370WA/CAALFM_C203800CA/ERO1/SRP101/DIE2/CAALFM_C404180CA/PHO88/CAALFM_C210200WA/CAALFM_C201220WA/VPS35	12	7	3642793/3637401/3634810/3643674/3643928/3638856/3645567	5	3640307/3641607/3636513/3641183/3641898
CC	GO:0000777	condensed chromosome kinetochore	2/209	11/970	0.722934	1	3635656/3635196	ASK1/CAALFM_C304690CA	2	2	3635656/3635196	0
CC	GO:0000779	condensed chromosome, centromeric region	2/209	11/970	0.722934	1	3635656/3635196	ASK1/CAALFM_C304690CA	2	2	3635656/3635196	0
CC	GO:0099023	tethering complex	2/209	11/970	0.722934	1	3644584/3647078	CAALFM_C102160WA/SEC8	2	1	3644584	1	3647078
CC	GO:0031090	organelle membrane	10/209	54/970	0.762035	1	3646288/3642793/3637401/3636513/3636968/3647650/3639233/3644698/3636817/3636834	PEX11/CAALFM_C406440CA/CAALFM_C203800CA/SRP101/TOM40/TOM22/QCR7/POR1/TOM20/CAALFM_C102960CA	10	4	3642793/3637401/3644698/3636834	6	3646288/3636513/3636968/3647650/3639233/3636817
CC	GO:0005794	Golgi apparatus	2/209	12/970	0.768231	1	3642793/3637401	CAALFM_C406440CA/CAALFM_C203800CA	2	2	3642793/3637401	0
CC	GO:0044431	Golgi apparatus part	2/209	12/970	0.768231	1	3642793/3637401	CAALFM_C406440CA/CAALFM_C203800CA	2	2	3642793/3637401	0
CC	GO:0031967	organelle envelope	7/209	39/970	0.77054	1	3636968/3647650/3639233/3644698/3636817/3636834/3638856	TOM40/TOM22/QCR7/POR1/TOM20/CAALFM_C102960CA/CAALFM_C201220WA	7	3	3644698/3636834/3638856	4	3636968/3647650/3639233/3636817
CC	GO:0031975	envelope	7/209	39/970	0.77054	1	3636968/3647650/3639233/3644698/3636817/3636834/3638856	TOM40/TOM22/QCR7/POR1/TOM20/CAALFM_C102960CA/CAALFM_C201220WA	7	3	3644698/3636834/3638856	4	3636968/3647650/3639233/3636817
CC	GO:0098798	mitochondrial protein complex	3/209	18/970	0.780929	1	3639233/3636817/3646057	QCR7/TOM20/CAALFM_CR07320CA	3	0		3	3639233/3636817/3646057
CC	GO:1905368	peptidase complex	3/209	19/970	0.812586	1	3636500/3636957/30515395	PRE1/PRE10/PRE6	3	0		3	3636500/3636957/30515395
CC	GO:0005856	cytoskeleton	3/209	20/970	0.840303	1	3635656/3647404/3646043	ASK1/MYO5/ARC15	3	3	3635656/3647404/3646043	0
CC	GO:0044430	cytoskeletal part	3/209	20/970	0.840303	1	3635656/3647404/3646043	ASK1/MYO5/ARC15	3	3	3635656/3647404/3646043	0
CC	GO:0000793	condensed chromosome	2/209	15/970	0.867606	1	3635656/3635196	ASK1/CAALFM_C304690CA	2	2	3635656/3635196	0
CC	GO:0044455	mitochondrial membrane part	2/209	16/970	0.890893	1	3639233/3636817	QCR7/TOM20	2	0		2	3639233/3636817
CC	GO:0044459	plasma membrane part	1/209	10/970	0.912792	1	3643318	FTR1	1	0		1	3643318
CC	GO:0044422	organelle part	38/209	208/970	0.919692	1	3646288/3642793/3643103/3640307/3641607/3635656/3647404/3637401/30515358/3639254/3643783/3636513/3636968/3644534/3644716/3647326/3647650/3639233/3643674/3636918/3641183/3635196/3645874/3638037/3644707/3644698/3636817/3636834/3643928/3638856/3645659/3646043/3640732/3644715/3646057/3644103/3638322/30514969	PEX11/CAALFM_C406440CA/MAM33/ORM1/CAALFM_C601370WA/ASK1/MYO5/CAALFM_C203800CA/HHO1/POL5/MTW1/SRP101/TOM40/CAALFM_C601920CA/CAALFM_C104180WA/HHT2/TOM22/QCR7/DIE2/MED17/CAALFM_C404180CA/CAALFM_C304690CA/CAALFM_C602300CA/DCC1/HHT21/POR1/TOM20/CAALFM_C102960CA/CAALFM_C210200WA/CAALFM_C201220WA/HTB1/ARC15/CAALFM_C108150CA/HTA2/CAALFM_CR07320CA/MED18/HTA3/CAALFM_C102330CA	38	22	3642793/3635656/3647404/3637401/30515358/3643783/3644716/3647326/3643674/3635196/3638037/3644707/3644698/3636834/3643928/3638856/3645659/3646043/3640732/3644715/3644103/3638322	16	3646288/3643103/3640307/3641607/3639254/3636513/3636968/3644534/3647650/3639233/3636918/3641183/3645874/3636817/3646057/30514969
CC	GO:0044446	intracellular organelle part	38/209	208/970	0.919692	1	3646288/3642793/3643103/3640307/3641607/3635656/3647404/3637401/30515358/3639254/3643783/3636513/3636968/3644534/3644716/3647326/3647650/3639233/3643674/3636918/3641183/3635196/3645874/3638037/3644707/3644698/3636817/3636834/3643928/3638856/3645659/3646043/3640732/3644715/3646057/3644103/3638322/30514969	PEX11/CAALFM_C406440CA/MAM33/ORM1/CAALFM_C601370WA/ASK1/MYO5/CAALFM_C203800CA/HHO1/POL5/MTW1/SRP101/TOM40/CAALFM_C601920CA/CAALFM_C104180WA/HHT2/TOM22/QCR7/DIE2/MED17/CAALFM_C404180CA/CAALFM_C304690CA/CAALFM_C602300CA/DCC1/HHT21/POR1/TOM20/CAALFM_C102960CA/CAALFM_C210200WA/CAALFM_C201220WA/HTB1/ARC15/CAALFM_C108150CA/HTA2/CAALFM_CR07320CA/MED18/HTA3/CAALFM_C102330CA	38	22	3642793/3635656/3647404/3637401/30515358/3643783/3644716/3647326/3643674/3635196/3638037/3644707/3644698/3636834/3643928/3638856/3645659/3646043/3640732/3644715/3644103/3638322	16	3646288/3643103/3640307/3641607/3639254/3636513/3636968/3644534/3647650/3639233/3636918/3641183/3645874/3636817/3646057/30514969
CC	GO:0000794	condensed nuclear chromosome	1/209	11/970	0.931778	1	3635656	ASK1	1	1	3635656	0
CC	GO:0015630	microtubule cytoskeleton	1/209	11/970	0.931778	1	3635656	ASK1	1	1	3635656	0
CC	GO:0033177	proton-transporting two-sector ATPase complex, proton-transporting domain	1/209	11/970	0.931778	1	3646070	STV1	1	0		1	3646070
CC	GO:0098800	inner mitochondrial membrane protein complex	1/209	13/970	0.958286	1	3639233	QCR7	1	0		1	3639233
CC	GO:0005743	mitochondrial inner membrane	2/209	21/970	0.960104	1	3639233/3636834	QCR7/CAALFM_C102960CA	2	1	3636834	1	3639233
CC	GO:0019866	organelle inner membrane	2/209	21/970	0.960104	1	3639233/3636834	QCR7/CAALFM_C102960CA	2	1	3636834	1	3639233
CC	GO:0016592	mediator complex	2/209	22/970	0.967585	1	3636918/3644103	MED17/MED18	2	1	3644103	1	3636918
CC	GO:0071944	cell periphery	2/209	22/970	0.967585	1	3643318/3647078	FTR1/SEC8	2	0		2	3643318/3647078
CC	GO:0005886	plasma membrane	1/209	16/970	0.980099	1	3643318	FTR1	1	0		1	3643318
CC	GO:0016469	proton-transporting two-sector ATPase complex	1/209	16/970	0.980099	1	3646070	STV1	1	0		1	3646070
CC	GO:0098796	membrane protein complex	8/209	65/970	0.983816	1	3643318/3645870/3636513/3639233/3636817/3643928/3646070/3645567	FTR1/SEC27/SRP101/QCR7/TOM20/CAALFM_C210200WA/STV1/VPS35	8	2	3643928/3645567	6	3643318/3645870/3636513/3639233/3636817/3646070
CC	GO:0030117	membrane coat	1/209	17/970	0.984459	1	3645870	SEC27	1	0		1	3645870
CC	GO:0048475	coated membrane	1/209	17/970	0.984459	1	3645870	SEC27	1	0		1	3645870
CC	GO:1990234	transferase complex	3/209	35/970	0.989674	1	3635164/3645874/3643928	CAALFM_C304970CA/CAALFM_C602300CA/CAALFM_C210200WA	3	1	3643928	2	3635164/3645874
CC	GO:0044454	nuclear chromosome part	1/209	19/970	0.990531	1	3635656	ASK1	1	1	3635656	0
CC	GO:1902494	catalytic complex	8/209	71/970	0.993586	1	3643318/3635164/3636500/3639233/3645874/3643928/3636957/30515395	FTR1/CAALFM_C304970CA/PRE1/QCR7/CAALFM_C602300CA/CAALFM_C210200WA/PRE10/PRE6	8	1	3643928	7	3643318/3635164/3636500/3639233/3645874/3636957/30515395
CC	GO:0000228	nuclear chromosome	1/209	21/970	0.994237	1	3635656	ASK1	1	1	3635656	0
CC	GO:0005654	nucleoplasm	3/209	42/970	0.997516	1	3644534/3636918/3644103	CAALFM_C601920CA/MED17/MED18	3	1	3644103	2	3644534/3636918
CC	GO:0044451	nucleoplasm part	3/209	42/970	0.997516	1	3644534/3636918/3644103	CAALFM_C601920CA/MED17/MED18	3	1	3644103	2	3644534/3636918
CC	GO:0031974	membrane-enclosed lumen	7/209	71/970	0.997805	1	3643103/3635656/3639254/3644534/3636918/3646057/3644103	MAM33/ASK1/POL5/CAALFM_C601920CA/MED17/CAALFM_CR07320CA/MED18	7	2	3635656/3644103	5	3643103/3639254/3644534/3636918/3646057
CC	GO:0043233	organelle lumen	7/209	71/970	0.997805	1	3643103/3635656/3639254/3644534/3636918/3646057/3644103	MAM33/ASK1/POL5/CAALFM_C601920CA/MED17/CAALFM_CR07320CA/MED18	7	2	3635656/3644103	5	3643103/3639254/3644534/3636918/3646057
CC	GO:0070013	intracellular organelle lumen	7/209	71/970	0.997805	1	3643103/3635656/3639254/3644534/3636918/3646057/3644103	MAM33/ASK1/POL5/CAALFM_C601920CA/MED17/CAALFM_CR07320CA/MED18	7	2	3635656/3644103	5	3643103/3639254/3644534/3636918/3646057
CC	GO:0031981	nuclear lumen	5/209	67/970	0.999662	1	3635656/3639254/3644534/3636918/3644103	ASK1/POL5/CAALFM_C601920CA/MED17/MED18	5	2	3635656/3644103	3	3639254/3644534/3636918
CC	GO:0044428	nuclear part	7/209	88/970	0.999906	1	3635656/3639254/3644534/3636918/3645874/3638856/3644103	ASK1/POL5/CAALFM_C601920CA/MED17/CAALFM_C602300CA/CAALFM_C201220WA/MED18	7	3	3635656/3638856/3644103	4	3639254/3644534/3636918/3645874
CC	GO:0043231	intracellular membrane-bounded organelle	50/209	344/970	0.99998	1	3646288/3641635/3642793/3643103/3640307/3641607/3635656/3641740/3637401/3634810/3638534/3642019/30515358/3639254/3643783/3636513/3636968/3635671/3644534/3648000/3641370/3647650/3639233/3643674/3636918/3641183/3641898/3645874/3640208/3646988/3643754/3641886/3644698/3636817/3636834/3643928/3644691/30515038/3638856/3643735/3642915/3635666/3646354/3636610/3635788/3636598/3639681/3646057/3639514/36441…	PEX11/ZCF18/CAALFM_C406440CA/MAM33/ORM1/CAALFM_C601370WA/ASK1/ZCF35/CAALFM_C203800CA/ERO1/ZFU2/CAALFM_C112280CA/HHO1/POL5/MTW1/SRP101/TOM40/CYT2/CAALFM_C601920CA/ECM22/ZCF29/TOM22/QCR7/DIE2/MED17/CAALFM_C404180CA/PHO88/CAALFM_C602300CA/STB5/FGR27/ZNC1/UGA33/POR1/TOM20/CAALFM_C102960CA/CAALFM_C210200WA/WAR1/PET100/CAALFM_C201220WA/CCN1/CZF1/ZCF26/ZCF13/CAALFM_C301220WA/CTF1/POX1-3/MMS22/CAALFM_CR0…	50	19	3642793/3635656/3641740/3637401/3634810/30515358/3643783/3648000/3643674/3644698/3636834/3643928/3638856/3643735/3642915/3635666/3636610/3636598/3644103	31	3646288/3641635/3643103/3640307/3641607/3638534/3642019/3639254/3636513/3636968/3635671/3644534/3641370/3647650/3639233/3636918/3641183/3641898/3645874/3640208/3646988/3643754/3641886/3636817/3644691/30515038/3646354/3635788/3639681/3646057/3639514
CC	GO:0043227	membrane-bounded organelle	50/209	352/970	0.999994	1	3646288/3641635/3642793/3643103/3640307/3641607/3635656/3641740/3637401/3634810/3638534/3642019/30515358/3639254/3643783/3636513/3636968/3635671/3644534/3648000/3641370/3647650/3639233/3643674/3636918/3641183/3641898/3645874/3640208/3646988/3643754/3641886/3644698/3636817/3636834/3643928/3644691/30515038/3638856/3643735/3642915/3635666/3646354/3636610/3635788/3636598/3639681/3646057/3639514/36441…	PEX11/ZCF18/CAALFM_C406440CA/MAM33/ORM1/CAALFM_C601370WA/ASK1/ZCF35/CAALFM_C203800CA/ERO1/ZFU2/CAALFM_C112280CA/HHO1/POL5/MTW1/SRP101/TOM40/CYT2/CAALFM_C601920CA/ECM22/ZCF29/TOM22/QCR7/DIE2/MED17/CAALFM_C404180CA/PHO88/CAALFM_C602300CA/STB5/FGR27/ZNC1/UGA33/POR1/TOM20/CAALFM_C102960CA/CAALFM_C210200WA/WAR1/PET100/CAALFM_C201220WA/CCN1/CZF1/ZCF26/ZCF13/CAALFM_C301220WA/CTF1/POX1-3/MMS22/CAALFM_CR0…	50	19	3642793/3635656/3641740/3637401/3634810/30515358/3643783/3648000/3643674/3644698/3636834/3643928/3638856/3643735/3642915/3635666/3636610/3636598/3644103	31	3646288/3641635/3643103/3640307/3641607/3638534/3642019/3639254/3636513/3636968/3635671/3644534/3641370/3647650/3639233/3636918/3641183/3641898/3645874/3640208/3646988/3643754/3641886/3636817/3644691/30515038/3646354/3635788/3639681/3646057/3639514
CC	GO:0005634	nucleus	27/209	247/970	1	1	3641635/3635656/3641740/3638534/30515358/3639254/3643783/3644534/3648000/3641370/3636918/3645874/3640208/3646988/3643754/3641886/3644691/3638856/3643735/3642915/3635666/3646354/3636610/3635788/3639681/3639514/3644103	ZCF18/ASK1/ZCF35/ZFU2/HHO1/POL5/MTW1/CAALFM_C601920CA/ECM22/ZCF29/MED17/CAALFM_C602300CA/STB5/FGR27/ZNC1/UGA33/WAR1/CAALFM_C201220WA/CCN1/CZF1/ZCF26/ZCF13/CAALFM_C301220WA/CTF1/MMS22/CAALFM_C106590CA/MED18	27	11	3635656/3641740/30515358/3643783/3648000/3638856/3643735/3642915/3635666/3636610/3644103	16	3641635/3638534/3639254/3644534/3641370/3636918/3645874/3640208/3646988/3643754/3641886/3644691/3646354/3635788/3639681/3639514
MF	GO:0003735	structural constituent of ribosome	42/537	82/2490	1.7e-09	2.75e-07	30515338/3647558/3646039/30515335/3636850/3637420/30515328/3642934/3640224/3647719/3636659/3636841/30515208/3639724/3647063/3635257/3637400/3640242/3643347/3640303/3643678/3638020/3639551/3637057/3639723/30515267/3636924/30515014/3639497/3636573/3639338/30515006/3637953/3637954/3646057/3640168/30515041/3635615/3643513/3635787/30515207/30514969	RPL25/RPL23A/MRPL8/RPL32/RPL10/CAALFM_C203950WA/RPS13/UBI3/MRP20/RPL3/RPL12/RPL13/RPS19A/MRPL6/CAALFM_C501550CA/RPL19A/RPL21A/RPS21/RPL4B/CAALFM_C603730CA/YST1/CAALFM_C701020CA/RPS22A/RPL5/CAALFM_CR00490WA/CAALFM_C404390WA/RPS1/CAALFM_C106890CA/MRPL19/RPS7A/RPL16A/RPS14B/RPS18/YML6/CAALFM_CR07320CA/CAALFM_CR01370CA/RPL42/RPL20B/CAALFM_C207190CA/RPS26A/RPL35/CAALFM_C102330CA	42	0		42	30515338/3647558/3646039/30515335/3636850/3637420/30515328/3642934/3640224/3647719/3636659/3636841/30515208/3639724/3647063/3635257/3637400/3640242/3643347/3640303/3643678/3638020/3639551/3637057/3639723/30515267/3636924/30515014/3639497/3636573/3639338/30515006/3637953/3637954/3646057/3640168/30515041/3635615/3643513/3635787/30515207/30514969
MF	GO:0005198	structural molecule activity	45/537	94/2490	7.03e-09	5.69e-07	30515338/3647558/3646039/30515335/3636850/3637420/3645870/30515328/3642934/3640224/3647719/3636659/3636841/30515208/3639724/3647063/3635257/3637400/3640242/3643347/3640303/3643678/3638020/3639551/3637057/3639723/30515267/3636924/30515014/3639497/3636573/3638856/3639338/30515006/3638433/3637953/3637954/3646057/3640168/30515041/3635615/3643513/3635787/30515207/30514969	RPL25/RPL23A/MRPL8/RPL32/RPL10/CAALFM_C203950WA/SEC27/RPS13/UBI3/MRP20/RPL3/RPL12/RPL13/RPS19A/MRPL6/CAALFM_C501550CA/RPL19A/RPL21A/RPS21/RPL4B/CAALFM_C603730CA/YST1/CAALFM_C701020CA/RPS22A/RPL5/CAALFM_CR00490WA/CAALFM_C404390WA/RPS1/CAALFM_C106890CA/MRPL19/RPS7A/CAALFM_C201220WA/RPL16A/RPS14B/ECM29/RPS18/YML6/CAALFM_CR07320CA/CAALFM_CR01370CA/RPL42/RPL20B/CAALFM_C207190CA/RPS26A/RPL35/CAALFM_C10…	45	1	3638856	44	30515338/3647558/3646039/30515335/3636850/3637420/3645870/30515328/3642934/3640224/3647719/3636659/3636841/30515208/3639724/3647063/3635257/3637400/3640242/3643347/3640303/3643678/3638020/3639551/3637057/3639723/30515267/3636924/30515014/3639497/3636573/3639338/30515006/3638433/3637953/3637954/3646057/3640168/30515041/3635615/3643513/3635787/30515207/30514969
MF	GO:0010181	FMN binding	8/537	16/2490	0.0109671	0.592225	3644060/3641603/3641618/3642919/3644077/3641342/3645873/3647921	EBP1/OYE2/OYE23/OYE32/ECM17/CAALFM_C703200CA/CAALFM_C602290CA/CAALFM_C200110WA	8	1	3647921	7	3644060/3641603/3641618/3642919/3644077/3641342/3645873
MF	GO:0005507	copper ion binding	5/537	1990-10-01	0.0439525	0.999726	3647152/3647151/3647153/3646842/3647131	FET99/FET31/FET3/COX11/FET34	5	0		5	3647152/3647151/3647153/3646842/3647131
MF	GO:0016491	oxidoreductase activity	64/537	249/2490	0.0576559	0.999726	3648031/3647152/3644012/3635693/3639700/3639667/3644060/3647151/3647153/3643909/3644934/3648032/3641603/3647071/3641618/3638306/3636576/3642989/3636213/3636954/3643411/3643452/3635852/3634810/3644563/3642919/3635716/3638354/3644010/3644077/3643782/3639205/3642921/3646841/3638532/3639699/3642078/3643520/3642494/3638382/30515385/3643778/3636507/3635826/3641757/3646660/3642030/3643781/3645025/363931…	PST3/FET99/ILV5/CAALFM_C402230CA/ALK2/MDH1/EBP1/FET31/FET3/PST2/IDP2/YCP4/OYE2/COX15/OYE23/CAALFM_C303470WA/CAALFM_C302070CA/RNR1/CYB2/CAALFM_C702010CA/ARH2/FRE9/FMO1/ERO1/GPD2/OYE32/ERG251/NDE1/CAALFM_C600850WA/ECM17/CAALFM_C209850CA/CAALFM_C602560WA/GUT2/FRE10/PRO2/CAALFM_CR00220WA/CAALFM_CR08310CA/PST1/TRP99/MET13/ERV1/SMM1/CAALFM_C504530WA/HOM2/CAALFM_C305840WA/CAALFM_C107630WA/SER33/CAALFM_C…	64	27	3648031/3635693/3639700/3643909/3648032/3636576/3636213/3636954/3643411/3635852/3634810/3635716/3638354/3643782/3642921/3639699/3642078/3643520/3643778/3641757/3643781/3646961/3636977/3638881/3636598/3639519/3645214	37	3647152/3644012/3639667/3644060/3647151/3647153/3644934/3641603/3647071/3641618/3638306/3642989/3643452/3644563/3642919/3644010/3644077/3639205/3646841/3638532/3642494/3638382/30515385/3636507/3635826/3646660/3642030/3645025/3639313/3638393/3634819/3642612/3647131/3639181/3634945/3641615/3638034
MF	GO:0016667	oxidoreductase activity, acting on a sulfur group of donors	5/537	1990-11-01	0.0666652	0.999726	3634810/30515385/3646660/3639313/3638881	ERO1/ERV1/CAALFM_C107630WA/TTR1/MXR1	5	2	3634810/3638881	3	30515385/3646660/3639313
MF	GO:0004521	endoribonuclease activity	6/537	15/2490	0.0828353	0.999726	3639237/3639238/3636451/3640722/3636408/3646411	RNH1/CAALFM_C602880WA/CAALFM_C504260WA/MRPL3/RNY11/SEN15	6	3	3636451/3636408/3646411	3	3639237/3639238/3640722
MF	GO:0005543	phospholipid binding	7/537	19/2490	0.0939748	0.999726	3639199/3637816/3640114/3648118/3645350/3645772/3640752	CAALFM_C603330CA/CAALFM_C502980CA/CAALFM_CR01720WA/CAALFM_C106320WA/CAALFM_C403810WA/CAALFM_C400590CA/CAALFM_C108340CA	7	5	3637816/3640114/3645350/3645772/3640752	2	3639199/3648118
MF	GO:0008289	lipid binding	7/537	19/2490	0.0939748	0.999726	3639199/3637816/3640114/3648118/3645350/3645772/3640752	CAALFM_C603330CA/CAALFM_C502980CA/CAALFM_CR01720WA/CAALFM_C106320WA/CAALFM_C403810WA/CAALFM_C400590CA/CAALFM_C108340CA	7	5	3637816/3640114/3645350/3645772/3640752	2	3639199/3648118
MF	GO:0035091	phosphatidylinositol binding	6/537	16/2490	0.109382	0.999726	3639199/3637816/3640114/3648118/3645350/3640752	CAALFM_C603330CA/CAALFM_C502980CA/CAALFM_CR01720WA/CAALFM_C106320WA/CAALFM_C403810WA/CAALFM_C108340CA	6	4	3637816/3640114/3645350/3640752	2	3639199/3648118
MF	GO:0016831	carboxy-lyase activity	4/537	1990-10-01	0.149633	0.999726	3639701/3640297/3644116/3641233	PCK1/CAALFM_C603620CA/SPE2/CAALFM_C210860CA	4	1	3644116	3	3639701/3640297/3641233
MF	GO:0004519	endonuclease activity	6/537	18/2490	0.173445	0.999726	3639237/3639238/3636451/3640722/3636408/3646411	RNH1/CAALFM_C602880WA/CAALFM_C504260WA/MRPL3/RNY11/SEN15	6	3	3636451/3636408/3646411	3	3639237/3639238/3640722
MF	GO:0046983	protein dimerization activity	13/537	46/2490	0.17393	0.999726	3640133/3647327/3644716/3647326/3635826/3644705/3644707/3644423/3636203/3645659/3641812/3644715/3638322	MGE1/HHF22/CAALFM_C104180WA/HHT2/HOM2/HHF1/HHT21/RTG3/TYE7/HTB1/CAALFM_C405630WA/HTA2/HTA3	13	10	3647327/3644716/3647326/3644705/3644707/3644423/3636203/3645659/3644715/3638322	3	3640133/3635826/3641812
MF	GO:0016798	hydrolase activity, acting on glycosyl bonds	8/537	26/2490	0.17962	0.999726	3636797/3641632/3639703/3637426/3647194/3635691/3643106/3637905	SCW4/FPG1/NGS1/CAALFM_C203910CA/GCA2/BGL2/OGG1/CRH11	8	2	3636797/3637905	6	3641632/3639703/3637426/3647194/3635691/3643106
MF	GO:0050662	coenzyme binding	28/537	110/2490	0.184061	0.999726	3644060/3647344/3641603/3636827/3641618/3636552/3648026/3635852/3644563/3647320/3642919/3644077/3635651/3640163/3641342/3643778/3635826/3641757/3638828/3642030/3645025/3638393/3643468/3645873/3647241/3641615/3634899/3647921	EBP1/CAALFM_CR07820WA/OYE2/CAALFM_C102740CA/OYE23/ILV2/GRE2/FMO1/GPD2/ARO10/OYE32/ECM17/AAT22/CAALFM_CR01810CA/CAALFM_C703200CA/SMM1/HOM2/CAALFM_C305840WA/ARO8/SER33/HIS4/AIP2/AAT1/CAALFM_C602290CA/AAT21/MAE1/GRP1/CAALFM_C200110WA	28	9	3647344/3636827/3635852/3647320/3640163/3643778/3641757/3634899/3647921	19	3644060/3641603/3641618/3636552/3648026/3644563/3642919/3644077/3635651/3641342/3635826/3638828/3642030/3645025/3638393/3643468/3645873/3647241/3641615
MF	GO:0016810	hydrolase activity, acting on carbon-nitrogen (but not peptide) bonds	4/537	1990-11-01	0.197043	0.999726	3645967/3639716/3645025/3637975	DAC1/CDA2/HIS4/CAALFM_C700130WA	4	2	3639716/3637975	2	3645967/3645025
MF	GO:0016836	hydro-lyase activity	4/537	1990-11-01	0.197043	0.999726	3636621/3638346/3647777/3648087	NCE103/PHA2/HIS3/TRP5	4	1	3636621	3	3638346/3647777/3648087
MF	GO:0004175	endopeptidase activity	10/537	35/2490	0.205666	0.999726	3638884/3646074/3636589/3643295/3640999/3645040/3636500/3641012/3636957/30515395	CAALFM_C200700WA/CAALFM_C600340CA/AFG3/DDI1/PIM1/STE24/PRE1/LAP3/PRE10/PRE6	10	1	3641012	9	3638884/3646074/3636589/3643295/3640999/3645040/3636500/3636957/30515395
MF	GO:0016616	oxidoreductase activity, acting on the CH-OH group of donors, NAD or NADP as acceptor	9/537	31/2490	0.208229	0.999726	3644012/3639667/3644934/3644563/3642030/3645025/3639181/3641615/3638034	ILV5/MDH1/IDP2/GPD2/SER33/HIS4/CAALFM_C603240WA/MAE1/LEU2	9	0		9	3644012/3639667/3644934/3644563/3642030/3645025/3639181/3641615/3638034
MF	GO:0005215	transporter activity	37/537	151/2490	0.209142	0.999726	3642307/3642634/3638048/3642303/3646404/3635265/3642793/3640175/3643318/3635863/3642635/3642288/3646284/3637036/3646562/3639894/3647141/3641209/3635752/3647791/3643440/3645976/3645017/3636420/3647897/3643335/3645420/3646239/3646070/3639546/3643822/3639344/3640093/3647441/3639861/3645022/3638857	SIT1/GIT3/HGT12/YVC1/HGT9/CDR2/CAALFM_C406440CA/CCH1/FTR1/HGT20/GIT4/HST6/ATM1/CAALFM_C701600WA/GIT1/UGA4/NHX1/CAALFM_C210720CA/CAALFM_C202180WA/TPO5/ITR1/CAALFM_C604550CA/MNR2/MAL31/HET1/DUR7/HGT1/CAALFM_C703590CA/STV1/HAK1/FCY21/CAALFM_C100830WA/HNM3/MID1/PHO87/MEP2/HNM1	37	22	3642634/3642303/3646404/3635265/3642793/3640175/3635863/3642635/3642288/3646562/3639894/3641209/3635752/3647791/3643440/3645420/3646239/3639546/3643822/3647441/3639861/3638857	15	3642307/3638048/3643318/3646284/3637036/3647141/3645976/3645017/3636420/3647897/3643335/3646070/3639344/3640093/3645022
MF	GO:0046982	protein heterodimerization activity	8/537	27/2490	0.210126	0.999726	3647327/3644716/3647326/3644705/3644707/3645659/3644715/3638322	HHF22/CAALFM_C104180WA/HHT2/HHF1/HHT21/HTB1/HTA2/HTA3	8	8	3647327/3644716/3647326/3644705/3644707/3645659/3644715/3638322	0
MF	GO:0003924	GTPase activity	12/537	44/2490	0.22398	0.999726	3642656/3639360/3636123/3640238/3643160/3636513/3644478/3641389/3640713/3643673/3643927/3642998	VPS1/TUF1/CAALFM_C113060CA/CRL1/CAALFM_C704260WA/SRP101/RIA1/IFM1/FUN12/DNM1/RAS1/EFT2	12	4	3642656/3640238/3644478/3643927	8	3639360/3636123/3643160/3636513/3641389/3640713/3643673/3642998
MF	GO:0016829	lyase activity	10/537	36/2490	0.23352	0.999726	3639701/3640297/3636621/3635671/3644116/3638346/3641233/3645211/3647777/3648087	PCK1/CAALFM_C603620CA/NCE103/CYT2/SPE2/PHA2/CAALFM_C210860CA/HEM15/HIS3/TRP5	10	2	3636621/3644116	8	3639701/3640297/3635671/3638346/3641233/3645211/3647777/3648087
MF	GO:0052689	carboxylic ester hydrolase activity	7/537	24/2490	0.246293	0.999726	3640275/3634797/3634854/3645987/3645956/3645137/3638390	NAM2/LIP3/LIP2/LIP4/ILS1/CAALFM_CR03400WA/DTD2	7	2	3634797/3634854	5	3640275/3645987/3645956/3645137/3638390
MF	GO:0008237	metallopeptidase activity	4/537	1990-12-01	0.248215	0.999726	3638884/3646074/3636589/3645040	CAALFM_C200700WA/CAALFM_C600340CA/AFG3/STE24	4	0		4	3638884/3646074/3636589/3645040
MF	GO:0016835	carbon-oxygen lyase activity	4/537	1990-12-01	0.248215	0.999726	3636621/3638346/3647777/3648087	NCE103/PHA2/HIS3/TRP5	4	1	3636621	3	3638346/3647777/3648087
MF	GO:0016298	lipase activity	6/537	20/2490	0.249204	0.999726	3634797/3634854/3645987/3644562/3647039/3647089	LIP3/LIP2/LIP4/PLB2/SPO1/PLB3	6	4	3634797/3634854/3647039/3647089	2	3645987/3644562
MF	GO:0019783	ubiquitin-like protein-specific protease activity	5/537	16/2490	0.250408	0.999726	3643912/3647903/3635769/3639558/3639317	CAALFM_C208620WA/CAALFM_C600170CA/CAALFM_C202020WA/CAALFM_C106390WA/UBP6	5	1	3643912	4	3647903/3635769/3639558/3639317
MF	GO:0036459	thiol-dependent ubiquitinyl hydrolase activity	5/537	16/2490	0.250408	0.999726	3643912/3647903/3635769/3639558/3639317	CAALFM_C208620WA/CAALFM_C600170CA/CAALFM_C202020WA/CAALFM_C106390WA/UBP6	5	1	3643912	4	3647903/3635769/3639558/3639317
MF	GO:0101005	ubiquitinyl hydrolase activity	5/537	16/2490	0.250408	0.999726	3643912/3647903/3635769/3639558/3639317	CAALFM_C208620WA/CAALFM_C600170CA/CAALFM_C202020WA/CAALFM_C106390WA/UBP6	5	1	3643912	4	3647903/3635769/3639558/3639317
MF	GO:0016788	hydrolase activity, acting on ester bonds	25/537	102/2490	0.264912	0.999726	3639237/3640275/3634797/3634854/3645626/3642985/3639238/3645987/3645956/3647079/3638481/3644562/3645137/3636451/3638390/3645374/3640722/3638940/3636617/3647858/3636408/3647039/3647089/3636505/3646411	RNH1/NAM2/LIP3/LIP2/CAALFM_C303860WA/PLC2/CAALFM_C602880WA/LIP4/ILS1/CAALFM_C600770CA/CAALFM_C307450CA/PLB2/CAALFM_CR03400WA/CAALFM_C504260WA/DTD2/RAD2/MRPL3/PTP3/CAALFM_C302360CA/PTP2/RNY11/SPO1/PLB3/GDE1/SEN15	25	13	3634797/3634854/3645626/3642985/3638481/3636451/3636617/3647858/3636408/3647039/3647089/3636505/3646411	12	3639237/3640275/3639238/3645987/3645956/3647079/3644562/3645137/3638390/3645374/3640722/3638940
MF	GO:0016614	oxidoreductase activity, acting on CH-OH group of donors	9/537	33/2490	0.269432	0.999726	3644012/3639667/3644934/3644563/3642030/3645025/3639181/3641615/3638034	ILV5/MDH1/IDP2/GPD2/SER33/HIS4/CAALFM_C603240WA/MAE1/LEU2	9	0		9	3644012/3639667/3644934/3644563/3642030/3645025/3639181/3641615/3638034
MF	GO:0000030	mannosyltransferase activity	6/537	21/2490	0.29011	0.999726	3639182/3639258/3638357/3646425/3640439/3645443	BMT4/BMT6/BMT7/KTR4/BMT3/KTR2	6	5	3639182/3639258/3638357/3646425/3640439	1	3645443
MF	GO:0008234	cysteine-type peptidase activity	6/537	21/2490	0.29011	0.999726	3643912/3647903/3635769/3641012/3639558/3639317	CAALFM_C208620WA/CAALFM_C600170CA/CAALFM_C202020WA/LAP3/CAALFM_C106390WA/UBP6	6	2	3643912/3641012	4	3647903/3635769/3639558/3639317
MF	GO:0022857	transmembrane transporter activity	34/537	145/2490	0.316592	0.999726	3642307/3642634/3638048/3642303/3646404/3635265/3642793/3640175/3643318/3635863/3642635/3642288/3646284/3646562/3639894/3647141/3641209/3635752/3647791/3643440/3645976/3645017/3636420/3643335/3645420/3646239/3646070/3639546/3643822/3639344/3640093/3647441/3645022/3638857	SIT1/GIT3/HGT12/YVC1/HGT9/CDR2/CAALFM_C406440CA/CCH1/FTR1/HGT20/GIT4/HST6/ATM1/GIT1/UGA4/NHX1/CAALFM_C210720CA/CAALFM_C202180WA/TPO5/ITR1/CAALFM_C604550CA/MNR2/MAL31/DUR7/HGT1/CAALFM_C703590CA/STV1/HAK1/FCY21/CAALFM_C100830WA/HNM3/MID1/MEP2/HNM1	34	21	3642634/3642303/3646404/3635265/3642793/3640175/3635863/3642635/3642288/3646562/3639894/3641209/3635752/3647791/3643440/3645420/3646239/3639546/3643822/3647441/3638857	13	3642307/3638048/3643318/3646284/3647141/3645976/3645017/3636420/3643335/3646070/3639344/3640093/3645022
MF	GO:0004540	ribonuclease activity	6/537	22/2490	0.332252	0.999726	3639237/3639238/3636451/3640722/3636408/3646411	RNH1/CAALFM_C602880WA/CAALFM_C504260WA/MRPL3/RNY11/SEN15	6	3	3636451/3636408/3646411	3	3639237/3639238/3640722
MF	GO:0046873	metal ion transmembrane transporter activity	6/537	22/2490	0.332252	0.999726	3643318/3641209/3635752/3645017/3639546/3647441	FTR1/CAALFM_C210720CA/CAALFM_C202180WA/MNR2/HAK1/MID1	6	4	3641209/3635752/3639546/3647441	2	3643318/3645017
MF	GO:0016757	transferase activity, transferring glycosyl groups	16/537	66/2490	0.342012	0.999726	3639182/3639258/3637784/3638357/3642282/3646425/3644405/3640439/3643674/3636488/3643928/3641117/3645443/3638789/3644794/3635743	BMT4/BMT6/MNN1/BMT7/GLG2/KTR4/MNN2/BMT3/DIE2/CAALFM_C505040WA/CAALFM_C210200WA/MNN22/KTR2/MNN24/MNN15/STT3	16	13	3639182/3639258/3637784/3638357/3642282/3646425/3640439/3643674/3636488/3643928/3638789/3644794/3635743	3	3644405/3641117/3645443
MF	GO:0016830	carbon-carbon lyase activity	4/537	14/2490	0.35641	0.999726	3639701/3640297/3644116/3641233	PCK1/CAALFM_C603620CA/SPE2/CAALFM_C210860CA	4	1	3644116	3	3639701/3640297/3641233
MF	GO:0016893	endonuclease activity, active with either ribo- or deoxyribonucleic acids and producing 5'-phosphomonoesters	3/537	1990-10-01	0.369814	0.999726	3639237/3639238/3640722	RNH1/CAALFM_C602880WA/MRPL3	3	0		3	3639237/3639238/3640722
MF	GO:0004553	hydrolase activity, hydrolyzing O-glycosyl compounds	6/537	23/2490	0.375055	0.999726	3636797/3639703/3637426/3647194/3635691/3637905	SCW4/NGS1/CAALFM_C203910CA/GCA2/BGL2/CRH11	6	2	3636797/3637905	4	3639703/3637426/3647194/3635691
MF	GO:0051287	NAD binding	6/537	23/2490	0.375055	0.999726	3636827/3644563/3635826/3642030/3645025/3641615	CAALFM_C102740CA/GPD2/HOM2/SER33/HIS4/MAE1	6	1	3636827	5	3644563/3635826/3642030/3645025/3641615
MF	GO:0043169	cation binding	59/537	263/2490	0.384711	0.999726	3647152/3635693/3638886/3639700/3647151/3647153/3641745/3641635/3638884/3647664/3639236/3636552/3641740/3641632/3641938/3643299/30515248/3635819/3647320/3643744/3646842/3638534/3635716/3634762/3636621/3637426/3635769/3636874/3639699/3638899/3637873/3648000/3635184/3641370/3636507/3643327/3636503/3641397/3637871/3640208/3646988/3643754/3644450/3642244/3641886/3646424/3645025/3644691/3645001/364713…	FET99/CAALFM_C402230CA/SOD5/ALK2/FET31/FET3/CAALFM_C306040WA/ZCF18/CAALFM_C200700WA/BRG1/STE23/ILV2/ZCF35/FPG1/AXL1/CAALFM_C114450CA/SOD1/CAALFM_C202530WA/ARO10/GIS2/COX11/ZFU2/ERG251/PPT2/NCE103/CAALFM_C203910CA/CAALFM_C202020WA/RAD16/CAALFM_CR00220WA/SOD6/CAALFM_C402960WA/ECM22/AFP99/ZCF29/CAALFM_C504530WA/CAALFM_C114470WA/CAR1/CAALFM_C702860CA/UBR1/STB5/FGR27/ZNC1/ADA2/CYM1/UGA33/CAALFM_C10399…	59	22	3635693/3638886/3639700/3641745/3647664/3641740/3641938/30515248/3647320/3635716/3634762/3636621/3639699/3638899/3648000/3635184/3636503/3644450/3642915/3635666/3636610/3634867	37	3647152/3647151/3647153/3641635/3638884/3639236/3636552/3641632/3643299/3635819/3643744/3646842/3638534/3637426/3635769/3636874/3637873/3641370/3636507/3643327/3641397/3637871/3640208/3646988/3643754/3642244/3641886/3646424/3645025/3644691/3645001/3647131/3639009/3646354/3635788/3637821/3638802
MF	GO:0070011	peptidase activity, acting on L-amino acid peptides	16/537	69/2490	0.417057	0.999726	3643912/3638884/3646074/3636589/3643295/3643299/3647903/3640999/3635769/3645040/3636500/3641012/3639558/3639317/3636957/30515395	CAALFM_C208620WA/CAALFM_C200700WA/CAALFM_C600340CA/AFG3/DDI1/CAALFM_C114450CA/CAALFM_C600170CA/PIM1/CAALFM_C202020WA/STE24/PRE1/LAP3/CAALFM_C106390WA/UBP6/PRE10/PRE6	16	2	3643912/3641012	14	3638884/3646074/3636589/3643295/3643299/3647903/3640999/3635769/3645040/3636500/3639558/3639317/3636957/30515395
MF	GO:0046872	metal ion binding	58/537	261/2490	0.41909	0.999726	3647152/3635693/3638886/3639700/3647151/3647153/3641745/3641635/3638884/3647664/3639236/3636552/3641740/3641632/3641938/3643299/30515248/3635819/3643744/3646842/3638534/3635716/3634762/3636621/3637426/3635769/3636874/3639699/3638899/3637873/3648000/3635184/3641370/3636507/3643327/3636503/3641397/3637871/3640208/3646988/3643754/3644450/3642244/3641886/3646424/3645025/3644691/3645001/3647131/364291…	FET99/CAALFM_C402230CA/SOD5/ALK2/FET31/FET3/CAALFM_C306040WA/ZCF18/CAALFM_C200700WA/BRG1/STE23/ILV2/ZCF35/FPG1/AXL1/CAALFM_C114450CA/SOD1/CAALFM_C202530WA/GIS2/COX11/ZFU2/ERG251/PPT2/NCE103/CAALFM_C203910CA/CAALFM_C202020WA/RAD16/CAALFM_CR00220WA/SOD6/CAALFM_C402960WA/ECM22/AFP99/ZCF29/CAALFM_C504530WA/CAALFM_C114470WA/CAR1/CAALFM_C702860CA/UBR1/STB5/FGR27/ZNC1/ADA2/CYM1/UGA33/CAALFM_C103990WA/HI…	58	21	3635693/3638886/3639700/3641745/3647664/3641740/3641938/30515248/3635716/3634762/3636621/3639699/3638899/3648000/3635184/3636503/3644450/3642915/3635666/3636610/3634867	37	3647152/3647151/3647153/3641635/3638884/3639236/3636552/3641632/3643299/3635819/3643744/3646842/3638534/3637426/3635769/3636874/3637873/3641370/3636507/3643327/3641397/3637871/3640208/3646988/3643754/3642244/3641886/3646424/3645025/3644691/3645001/3647131/3639009/3646354/3635788/3637821/3638802
MF	GO:0001883	purine nucleoside binding	16/537	70/2490	0.442354	0.999726	3642656/3639360/3645982/3636123/3640238/3643160/3636513/3644478/3634845/3641389/3645866/3644719/3640713/3643673/3643927/3642998	VPS1/TUF1/CAALFM_C604450WA/CAALFM_C113060CA/CRL1/CAALFM_C704260WA/SRP101/RIA1/CAALFM_C109810WA/IFM1/CAALFM_C602230WA/CDC3/FUN12/DNM1/RAS1/EFT2	16	6	3642656/3640238/3644478/3634845/3644719/3643927	10	3639360/3645982/3636123/3643160/3636513/3641389/3645866/3640713/3643673/3642998
MF	GO:0005525	GTP binding	16/537	70/2490	0.442354	0.999726	3642656/3639360/3645982/3636123/3640238/3643160/3636513/3644478/3634845/3641389/3645866/3644719/3640713/3643673/3643927/3642998	VPS1/TUF1/CAALFM_C604450WA/CAALFM_C113060CA/CRL1/CAALFM_C704260WA/SRP101/RIA1/CAALFM_C109810WA/IFM1/CAALFM_C602230WA/CDC3/FUN12/DNM1/RAS1/EFT2	16	6	3642656/3640238/3644478/3634845/3644719/3643927	10	3639360/3645982/3636123/3643160/3636513/3641389/3645866/3640713/3643673/3642998
MF	GO:0032549	ribonucleoside binding	16/537	70/2490	0.442354	0.999726	3642656/3639360/3645982/3636123/3640238/3643160/3636513/3644478/3634845/3641389/3645866/3644719/3640713/3643673/3643927/3642998	VPS1/TUF1/CAALFM_C604450WA/CAALFM_C113060CA/CRL1/CAALFM_C704260WA/SRP101/RIA1/CAALFM_C109810WA/IFM1/CAALFM_C602230WA/CDC3/FUN12/DNM1/RAS1/EFT2	16	6	3642656/3640238/3644478/3634845/3644719/3643927	10	3639360/3645982/3636123/3643160/3636513/3641389/3645866/3640713/3643673/3642998
MF	GO:0032550	purine ribonucleoside binding	16/537	70/2490	0.442354	0.999726	3642656/3639360/3645982/3636123/3640238/3643160/3636513/3644478/3634845/3641389/3645866/3644719/3640713/3643673/3643927/3642998	VPS1/TUF1/CAALFM_C604450WA/CAALFM_C113060CA/CRL1/CAALFM_C704260WA/SRP101/RIA1/CAALFM_C109810WA/IFM1/CAALFM_C602230WA/CDC3/FUN12/DNM1/RAS1/EFT2	16	6	3642656/3640238/3644478/3634845/3644719/3643927	10	3639360/3645982/3636123/3643160/3636513/3641389/3645866/3640713/3643673/3642998
MF	GO:0032561	guanyl ribonucleotide binding	16/537	70/2490	0.442354	0.999726	3642656/3639360/3645982/3636123/3640238/3643160/3636513/3644478/3634845/3641389/3645866/3644719/3640713/3643673/3643927/3642998	VPS1/TUF1/CAALFM_C604450WA/CAALFM_C113060CA/CRL1/CAALFM_C704260WA/SRP101/RIA1/CAALFM_C109810WA/IFM1/CAALFM_C602230WA/CDC3/FUN12/DNM1/RAS1/EFT2	16	6	3642656/3640238/3644478/3634845/3644719/3643927	10	3639360/3645982/3636123/3643160/3636513/3641389/3645866/3640713/3643673/3642998
MF	GO:0016787	hydrolase activity	84/537	383/2490	0.448113	0.999726	3635718/3642656/3639237/3640275/3634797/3634854/3643912/3639360/3645626/3642985/3635265/3639238/3645987/3635592/3645956/3647404/3638884/3636797/3636123/3646074/3636589/3641632/3643295/3643299/3642288/3646284/3647903/3647079/3640238/3643160/3639703/3636513/3640999/3644478/3638481/3644562/3637426/3641389/3635769/3645967/3645040/3645137/3636451/3638390/3645374/3636500/3639716/3640722/3641012/3635595…	CAALFM_C400850CA/VPS1/RNH1/NAM2/LIP3/LIP2/CAALFM_C208620WA/TUF1/CAALFM_C303860WA/PLC2/CDR2/CAALFM_C602880WA/LIP4/CAALFM_C401840CA/ILS1/MYO5/CAALFM_C200700WA/SCW4/CAALFM_C113060CA/CAALFM_C600340CA/AFG3/FPG1/DDI1/CAALFM_C114450CA/HST6/ATM1/CAALFM_C600170CA/CAALFM_C600770CA/CRL1/CAALFM_C704260WA/NGS1/SRP101/PIM1/RIA1/CAALFM_C307450CA/PLB2/CAALFM_C203910CA/IFM1/CAALFM_C202020WA/DAC1/STE24/CAALFM_CR03…	84	34	3635718/3642656/3634797/3634854/3643912/3645626/3642985/3635265/3635592/3647404/3636797/3642288/3640238/3644478/3638481/3636451/3639716/3641012/3643927/3636617/3639332/3647858/3636408/3647039/3637724/3647089/3636505/3646668/3637905/3646411/3637930/3641716/3637975/3642917	50	3639237/3640275/3639360/3639238/3645987/3645956/3638884/3636123/3646074/3636589/3641632/3643295/3643299/3646284/3647903/3647079/3643160/3639703/3636513/3640999/3644562/3637426/3641389/3635769/3645967/3645040/3645137/3638390/3645374/3636500/3640722/3635595/3638940/3643193/3647194/3640713/3639558/3643673/3645884/3645025/3639317/3635691/3636665/3638014/3643106/3642603/3640289/3642998/3636957/30515395
MF	GO:0004812	aminoacyl-tRNA ligase activity	8/537	34/2490	0.456488	0.999726	3640275/3645124/3636824/3645956/3640285/3645137/3636398/3646086	NAM2/CAALFM_CR03110WA/FRS2/ILS1/ALA1/CAALFM_CR03400WA/MSM1/CAALFM_C600390WA	8	1	3636824	7	3640275/3645124/3645956/3640285/3645137/3636398/3646086
MF	GO:0016875	ligase activity, forming carbon-oxygen bonds	8/537	34/2490	0.456488	0.999726	3640275/3645124/3636824/3645956/3640285/3645137/3636398/3646086	NAM2/CAALFM_CR03110WA/FRS2/ILS1/ALA1/CAALFM_CR03400WA/MSM1/CAALFM_C600390WA	8	1	3636824	7	3640275/3645124/3645956/3640285/3645137/3636398/3646086
MF	GO:0016627	oxidoreductase activity, acting on the CH-CH group of donors	4/537	16/2490	0.464505	0.999726	3647071/3643778/3634819/3636598	COX15/SMM1/URA1/POX1-3	4	2	3643778/3636598	2	3647071/3634819
MF	GO:0001882	nucleoside binding	16/537	71/2490	0.467619	0.999726	3642656/3639360/3645982/3636123/3640238/3643160/3636513/3644478/3634845/3641389/3645866/3644719/3640713/3643673/3643927/3642998	VPS1/TUF1/CAALFM_C604450WA/CAALFM_C113060CA/CRL1/CAALFM_C704260WA/SRP101/RIA1/CAALFM_C109810WA/IFM1/CAALFM_C602230WA/CDC3/FUN12/DNM1/RAS1/EFT2	16	6	3642656/3640238/3644478/3634845/3644719/3643927	10	3639360/3645982/3636123/3643160/3636513/3641389/3645866/3640713/3643673/3642998
MF	GO:0003676	nucleic acid binding	93/537	427/2490	0.475563	0.999726	3639237/3638890/3637952/3641553/3641722/3646280/3634785/3640267/3639238/3640195/3645124/3648197/3636824/3640571/3647664/3635700/3641632/3639378/3640990/3635819/3635162/3647079/3643744/3646950/3641646/3645033/30515358/3642478/3639254/3645324/3641162/3640285/3640246/3639228/3639209/3636451/3641648/3638991/3644716/3639724/3637340/3647326/3644552/3640242/3640208/3637992/3642464/3643194/3640171/364698…	RNH1/RFC5/YOX1/CAALFM_C500380WA/CRZ1/CAALFM_C604290WA/CAALFM_C110190WA/PBP2/CAALFM_C602880WA/RPS42/CAALFM_CR03110WA/CAALFM_CR09050CA/FRS2/CAALFM_C300030CA/BRG1/CAALFM_C401280CA/FPG1/RPO41/CAALFM_CR04250WA/CAALFM_C202530WA/CAALFM_C305150WA/CAALFM_C600770CA/GIS2/PUF3/TIF3/SUB2/HHO1/CAALFM_C105400CA/POL5/CAS1/CSR1/ALA1/CAALFM_C603550CA/CAALFM_C602690CA/NAB3/CAALFM_C504260WA/ANB1/RPO21/CAALFM_C104180…	93	33	3638890/3637952/3641553/3641722/3634785/3648197/3636824/3647664/3635700/30515358/3645324/3641162/3636451/3644716/3647326/3644552/3642828/3640129/3644450/3644707/3636408/3643779/3647601/3645659/3648193/3646668/3644715/3635666/3636610/3634867/3637911/3638322/3637975	60	3639237/3646280/3640267/3639238/3640195/3645124/3640571/3641632/3639378/3640990/3635819/3635162/3647079/3643744/3646950/3641646/3645033/3642478/3639254/3640285/3640246/3639228/3639209/3641648/3638991/3639724/3637340/3640242/3640208/3637992/3642464/3643194/3640171/3646988/3634792/3647675/3637057/3640698/30515104/3638014/3636419/3646519/3646276/3635251/3645115/3643106/3645363/3641247/3646354/364135…
MF	GO:0003677	DNA binding	41/537	187/2490	0.481439	0.999726	3638890/3637952/3641553/3647664/3641632/3639378/3640990/3635819/3647079/30515358/3639254/3645324/3640246/3638991/3644716/3637340/3647326/3640208/3640171/3646988/3644450/3644707/3647675/3643779/3638014/3646519/3645659/3635251/3643106/3645363/3646668/3644715/3635666/3646354/3641359/3636610/3635788/3642603/3634867/3645016/3638322	RFC5/YOX1/CAALFM_C500380WA/BRG1/FPG1/RPO41/CAALFM_CR04250WA/CAALFM_C202530WA/CAALFM_C600770CA/HHO1/POL5/CAS1/CAALFM_C603550CA/RPO21/CAALFM_C104180WA/RAD32/HHT2/STB5/MBF1/FGR27/ADA2/HHT21/TBP1/CAALFM_C209880CA/RAD3/CAALFM_C406020CA/HTB1/CAALFM_C304740CA/OGG1/CAALFM_C403680CA/CAALFM_C107470CA/HTA2/ZCF26/ZCF13/POL3/CAALFM_C301220WA/CTF1/CAALFM_CR02970CA/SFU1/CAALFM_C400390WA/HTA3	41	18	3638890/3637952/3641553/3647664/30515358/3645324/3644716/3647326/3644450/3644707/3643779/3645659/3646668/3644715/3635666/3636610/3634867/3638322	23	3641632/3639378/3640990/3635819/3647079/3639254/3640246/3638991/3637340/3640208/3640171/3646988/3647675/3638014/3646519/3635251/3643106/3645363/3646354/3641359/3635788/3642603/3645016
MF	GO:0008233	peptidase activity	16/537	72/2490	0.492752	0.999726	3643912/3638884/3646074/3636589/3643295/3643299/3647903/3640999/3635769/3645040/3636500/3641012/3639558/3639317/3636957/30515395	CAALFM_C208620WA/CAALFM_C200700WA/CAALFM_C600340CA/AFG3/DDI1/CAALFM_C114450CA/CAALFM_C600170CA/PIM1/CAALFM_C202020WA/STE24/PRE1/LAP3/CAALFM_C106390WA/UBP6/PRE10/PRE6	16	2	3643912/3641012	14	3638884/3646074/3636589/3643295/3643299/3647903/3640999/3635769/3645040/3636500/3639558/3639317/3636957/30515395
MF	GO:0019001	guanyl nucleotide binding	16/537	72/2490	0.492752	0.999726	3642656/3639360/3645982/3636123/3640238/3643160/3636513/3644478/3634845/3641389/3645866/3644719/3640713/3643673/3643927/3642998	VPS1/TUF1/CAALFM_C604450WA/CAALFM_C113060CA/CRL1/CAALFM_C704260WA/SRP101/RIA1/CAALFM_C109810WA/IFM1/CAALFM_C602230WA/CDC3/FUN12/DNM1/RAS1/EFT2	16	6	3642656/3640238/3644478/3634845/3644719/3643927	10	3639360/3645982/3636123/3643160/3636513/3641389/3645866/3640713/3643673/3642998
MF	GO:0140101	catalytic activity, acting on a tRNA	11/537	50/2490	0.526451	0.999726	3640275/3645124/3636824/3645956/3640285/3645137/3638390/3643778/3636398/3646086/3646411	NAM2/CAALFM_CR03110WA/FRS2/ILS1/ALA1/CAALFM_CR03400WA/DTD2/SMM1/MSM1/CAALFM_C600390WA/SEN15	11	3	3636824/3643778/3646411	8	3640275/3645124/3645956/3640285/3645137/3638390/3636398/3646086
MF	GO:0048037	cofactor binding	32/537	148/2490	0.527472	0.999726	3639700/3644060/3647344/3641603/3636827/3641618/3636552/3648026/3635852/3644563/3647320/3642919/3644077/3635651/3639699/3640163/3641342/3643778/3635826/3641757/3638828/3638999/3642030/3645025/3638393/3643468/3645873/3647241/3641615/3639519/3634899/3647921	ALK2/EBP1/CAALFM_CR07820WA/OYE2/CAALFM_C102740CA/OYE23/ILV2/GRE2/FMO1/GPD2/ARO10/OYE32/ECM17/AAT22/CAALFM_CR00220WA/CAALFM_CR01810CA/CAALFM_C703200CA/SMM1/HOM2/CAALFM_C305840WA/ARO8/YHB4/SER33/HIS4/AIP2/AAT1/CAALFM_C602290CA/AAT21/MAE1/GLT1/GRP1/CAALFM_C200110WA	32	12	3639700/3647344/3636827/3635852/3647320/3639699/3640163/3643778/3641757/3639519/3634899/3647921	20	3644060/3641603/3641618/3636552/3648026/3644563/3642919/3644077/3635651/3641342/3635826/3638828/3638999/3642030/3645025/3638393/3643468/3645873/3647241/3641615
MF	GO:0016758	transferase activity, transferring hexosyl groups	9/537	41/2490	0.538038	0.999726	3639182/3639258/3638357/3646425/3640439/3643674/3643928/3645443/3635743	BMT4/BMT6/BMT7/KTR4/BMT3/DIE2/CAALFM_C210200WA/KTR2/STT3	9	8	3639182/3639258/3638357/3646425/3640439/3643674/3643928/3635743	1	3645443
MF	GO:0004806	triglyceride lipase activity	3/537	13/2490	0.555221	0.999726	3634797/3634854/3645987	LIP3/LIP2/LIP4	3	2	3634797/3634854	1	3645987
MF	GO:0004518	nuclease activity	8/537	37/2490	0.562005	0.999726	3639237/3639238/3647079/3636451/3645374/3640722/3636408/3646411	RNH1/CAALFM_C602880WA/CAALFM_C600770CA/CAALFM_C504260WA/RAD2/MRPL3/RNY11/SEN15	8	3	3636451/3636408/3646411	5	3639237/3639238/3647079/3645374/3640722
MF	GO:0016705	oxidoreductase activity, acting on paired donors, with incorporation or reduction of molecular oxygen	5/537	23/2490	0.574088	0.999726	3639700/3635852/3639699/3641757/3643781	ALK2/FMO1/CAALFM_CR00220WA/CAALFM_C305840WA/CAALFM_C209860CA	5	5	3639700/3635852/3639699/3641757/3643781	0
MF	GO:0140097	catalytic activity, acting on DNA	5/537	23/2490	0.574088	0.999726	3641632/3638014/3635251/3643106/3642917	FPG1/RAD3/CAALFM_C304740CA/OGG1/CAALFM_C406800WA	5	1	3642917	4	3641632/3638014/3635251/3643106
MF	GO:0022804	active transmembrane transporter activity	6/537	28/2490	0.581774	0.999726	3635265/3642288/3646284/3647141/3646239/3639344	CDR2/HST6/ATM1/NHX1/CAALFM_C703590CA/CAALFM_C100830WA	6	3	3635265/3642288/3646239	3	3646284/3647141/3639344
MF	GO:0015318	inorganic molecular entity transmembrane transporter activity	11/537	52/2490	0.584461	0.999726	3642303/3640175/3643318/3647141/3641209/3635752/3645976/3645017/3646070/3639546/3647441	YVC1/CCH1/FTR1/NHX1/CAALFM_C210720CA/CAALFM_C202180WA/CAALFM_C604550CA/MNR2/STV1/HAK1/MID1	11	6	3642303/3640175/3641209/3635752/3639546/3647441	5	3643318/3647141/3645976/3645017/3646070
MF	GO:0004298	threonine-type endopeptidase activity	3/537	14/2490	0.609442	0.999726	3636500/3636957/30515395	PRE1/PRE10/PRE6	3	0		3	3636500/3636957/30515395
MF	GO:0070003	threonine-type peptidase activity	3/537	14/2490	0.609442	0.999726	3636500/3636957/30515395	PRE1/PRE10/PRE6	3	0		3	3636500/3636957/30515395
MF	GO:0016853	isomerase activity	7/537	34/2490	0.623052	0.999726	3638966/3642618/3634810/3639321/3635812/3644583/3635251	INO1/CAALFM_C501230CA/ERO1/TRP1/CPR3/GAL10/CAALFM_C304740CA	7	3	3642618/3634810/3644583	4	3638966/3639321/3635812/3635251
MF	GO:0046914	transition metal ion binding	40/537	192/2490	0.631284	0.999726	3647152/3635693/3639700/3647151/3647153/3641635/3638884/3647664/3641740/3641632/3643299/3635819/3643744/3646842/3638534/3635716/3636621/3635769/3639699/3637873/3648000/3641370/3643327/3641397/3637871/3640208/3646988/3643754/3644450/3641886/3646424/3645025/3644691/3647131/3642915/3635666/3646354/3636610/3635788/3634867	FET99/CAALFM_C402230CA/ALK2/FET31/FET3/ZCF18/CAALFM_C200700WA/BRG1/ZCF35/FPG1/CAALFM_C114450CA/CAALFM_C202530WA/GIS2/COX11/ZFU2/ERG251/NCE103/CAALFM_C202020WA/CAALFM_CR00220WA/CAALFM_C402960WA/ECM22/ZCF29/CAALFM_C114470WA/CAALFM_C702860CA/UBR1/STB5/FGR27/ZNC1/ADA2/UGA33/CAALFM_C103990WA/HIS4/WAR1/FET34/CZF1/ZCF26/ZCF13/CAALFM_C301220WA/CTF1/SFU1	40	13	3635693/3639700/3647664/3641740/3635716/3636621/3639699/3648000/3644450/3642915/3635666/3636610/3634867	27	3647152/3647151/3647153/3641635/3638884/3641632/3643299/3635819/3643744/3646842/3638534/3635769/3637873/3641370/3643327/3641397/3637871/3640208/3646988/3643754/3641886/3646424/3645025/3644691/3647131/3646354/3635788
MF	GO:0003723	RNA binding	20/537	98/2490	0.652067	0.999726	3640267/3640195/3645124/3636824/3635700/3646950/3642478/3636451/3641648/3639724/3640242/3636408/3637057/30515104/3641247/3636891/3637953/3642009/3637975/3640974	PBP2/RPS42/CAALFM_CR03110WA/FRS2/CAALFM_C401280CA/PUF3/CAALFM_C105400CA/CAALFM_C504260WA/ANB1/MRPL6/RPS21/RNY11/RPL5/RPS9B/RPS4A/CAALFM_C103370WA/RPS18/CAALFM_C111860WA/CAALFM_C700130WA/CAALFM_CR04140WA	20	5	3636824/3635700/3636451/3636408/3637975	15	3640267/3640195/3645124/3646950/3642478/3641648/3639724/3640242/3637057/30515104/3641247/3636891/3637953/3642009/3640974
MF	GO:0050660	flavin adenine dinucleotide binding	5/537	25/2490	0.653833	0.999726	3647344/3635852/3643778/3641757/3638393	CAALFM_CR07820WA/FMO1/SMM1/CAALFM_C305840WA/AIP2	5	4	3647344/3635852/3643778/3641757	1	3638393
MF	GO:0020037	heme binding	4/537	20/2490	0.654922	0.999726	3639700/3644077/3639699/3638999	ALK2/ECM17/CAALFM_CR00220WA/YHB4	4	2	3639700/3639699	2	3644077/3638999
MF	GO:0043565	sequence-specific DNA binding	4/537	20/2490	0.654922	0.999726	3647664/3635819/3640171/3634867	BRG1/CAALFM_C202530WA/MBF1/SFU1	4	2	3647664/3634867	2	3635819/3640171
MF	GO:0046906	tetrapyrrole binding	4/537	20/2490	0.654922	0.999726	3639700/3644077/3639699/3638999	ALK2/ECM17/CAALFM_CR00220WA/YHB4	4	2	3639700/3639699	2	3644077/3638999
MF	GO:0003774	motor activity	2/537	1990-10-01	0.670145	0.999726	3647404/3641716	MYO5/KIP3	2	2	3647404/3641716	0
MF	GO:0044877	protein-containing complex binding	2/537	1990-10-01	0.670145	0.999726	3636513/3641648	SRP101/ANB1	2	0		2	3636513/3641648
MF	GO:0022890	inorganic cation transmembrane transporter activity	8/537	41/2490	0.686631	0.999726	3643318/3647141/3641209/3635752/3645017/3646070/3639546/3647441	FTR1/NHX1/CAALFM_C210720CA/CAALFM_C202180WA/MNR2/STV1/HAK1/MID1	8	4	3641209/3635752/3639546/3647441	4	3643318/3647141/3645017/3646070
MF	GO:0016791	phosphatase activity	3/537	16/2490	0.703954	0.999726	3645626/3638940/3647858	CAALFM_C303860WA/PTP3/PTP2	3	2	3645626/3647858	1	3638940
MF	GO:0015075	ion transmembrane transporter activity	12/537	62/2490	0.714167	0.999726	3642303/3640175/3643318/3647141/3641209/3635752/3645976/3645017/3646070/3639546/3647441/3645022	YVC1/CCH1/FTR1/NHX1/CAALFM_C210720CA/CAALFM_C202180WA/CAALFM_C604550CA/MNR2/STV1/HAK1/MID1/MEP2	12	6	3642303/3640175/3641209/3635752/3639546/3647441	6	3643318/3647141/3645976/3645017/3646070/3645022
MF	GO:0004721	phosphoprotein phosphatase activity	2/537	1990-11-01	0.722487	0.999726	3638940/3647858	PTP3/PTP2	2	1	3647858	1	3638940
MF	GO:0005085	guanyl-nucleotide exchange factor activity	2/537	1990-11-01	0.722487	0.999726	3637434/3635220	ROM2/SEC7	2	1	3635220	1	3637434
MF	GO:0050661	NADP binding	2/537	1990-11-01	0.722487	0.999726	3635852/3641757	FMO1/CAALFM_C305840WA	2	2	3635852/3641757	0
MF	GO:0051082	unfolded protein binding	2/537	1990-11-01	0.722487	0.999726	3641623/3641554	CAALFM_C601460CA/CAALFM_C500350CA	2	0		2	3641623/3641554
MF	GO:0140098	catalytic activity, acting on RNA	19/537	97/2490	0.72403	0.999726	3639237/3640275/3639238/3645124/3636824/3645956/3639378/3640285/3645137/3636451/3638390/3638991/3640722/3643778/3636398/3636408/3646086/3641812/3646411	RNH1/NAM2/CAALFM_C602880WA/CAALFM_CR03110WA/FRS2/ILS1/RPO41/ALA1/CAALFM_CR03400WA/CAALFM_C504260WA/DTD2/RPO21/MRPL3/SMM1/MSM1/RNY11/CAALFM_C600390WA/CAALFM_C405630WA/SEN15	19	5	3636824/3636451/3643778/3636408/3646411	14	3639237/3640275/3639238/3645124/3645956/3639378/3640285/3645137/3638390/3638991/3640722/3636398/3646086/3641812
MF	GO:0008270	zinc ion binding	30/537	151/2490	0.730752	0.999726	3641635/3638884/3647664/3641740/3641632/3635819/3643744/3638534/3636621/3635769/3637873/3648000/3641370/3643327/3641397/3637871/3640208/3646988/3643754/3644450/3641886/3646424/3645025/3644691/3642915/3635666/3646354/3636610/3635788/3634867	ZCF18/CAALFM_C200700WA/BRG1/ZCF35/FPG1/CAALFM_C202530WA/GIS2/ZFU2/NCE103/CAALFM_C202020WA/CAALFM_C402960WA/ECM22/ZCF29/CAALFM_C114470WA/CAALFM_C702860CA/UBR1/STB5/FGR27/ZNC1/ADA2/UGA33/CAALFM_C103990WA/HIS4/WAR1/CZF1/ZCF26/ZCF13/CAALFM_C301220WA/CTF1/SFU1	30	9	3647664/3641740/3636621/3648000/3644450/3642915/3635666/3636610/3634867	21	3641635/3638884/3641632/3635819/3643744/3638534/3635769/3637873/3641370/3643327/3641397/3637871/3640208/3646988/3643754/3641886/3646424/3645025/3644691/3646354/3635788
MF	GO:0008092	cytoskeletal protein binding	4/537	22/2490	0.731168	0.999726	3644556/3637875/3640113/3641716	CAALFM_C111250WA/ABP1/SPC98/KIP3	4	4	3644556/3637875/3640113/3641716	0
MF	GO:0051536	iron-sulfur cluster binding	3/537	17/2490	0.744189	0.999726	3644077/3645873/3639519	ECM17/CAALFM_C602290CA/GLT1	3	1	3639519	2	3644077/3645873
MF	GO:0051540	metal cluster binding	3/537	17/2490	0.744189	0.999726	3644077/3645873/3639519	ECM17/CAALFM_C602290CA/GLT1	3	1	3639519	2	3644077/3645873
MF	GO:0060589	nucleoside-triphosphatase regulator activity	3/537	17/2490	0.744189	0.999726	3640133/3646953/3643298	MGE1/TSC2/GDI1	3	1	3646953	2	3640133/3643298
MF	GO:0140096	catalytic activity, acting on a protein	41/537	206/2490	0.753992	0.999726	3644836/3634866/3643912/3638884/3646074/3636589/3643295/3634810/3643299/3646075/3647903/3645897/3640999/3640429/3635769/3645040/3635164/3636500/3641888/3641012/3634879/3638940/3639558/3641358/3646497/3636636/3647784/3642643/3635812/3647858/3639317/3637922/3646158/3642459/3644838/3645878/3642789/3636957/3641611/30515395/3637394	CAALFM_CR06040WA/SWE1/CAALFM_C208620WA/CAALFM_C200700WA/CAALFM_C600340CA/AFG3/DDI1/ERO1/CAALFM_C114450CA/PKH3/CAALFM_C600170CA/GCN2/PIM1/CAALFM_CR01170WA/CAALFM_C202020WA/STE24/CAALFM_C304970CA/PRE1/MPS1/LAP3/TPK1/PTP3/CAALFM_C106390WA/NIK1/CAALFM_C108540CA/CAALFM_C302260CA/KIC1/SNF1/CPR3/PTP2/UBP6/BUB1/CAALFM_C405250WA/CEK2/CDC28/HRR25/CEK1/PRE10/PTK2/PRE6/CHK1	41	15	3644836/3634866/3643912/3634810/3645897/3641012/3634879/3646497/3647784/3647858/3637922/3646158/3642459/3644838/3642789	26	3638884/3646074/3636589/3643295/3643299/3646075/3647903/3640999/3640429/3635769/3645040/3635164/3636500/3641888/3638940/3639558/3641358/3636636/3642643/3635812/3639317/3645878/3636957/3641611/30515395/3637394
MF	GO:0032553	ribonucleotide binding	87/537	426/2490	0.755177	0.999726	3642656/3637323/3644060/3644836/3640275/3639701/3634866/3639360/3635265/3645982/3648091/3645124/3636824/3641603/3645956/3647404/3638884/3640571/3636123/3641618/3642989/3636589/3642288/3646075/3646284/3642919/3640238/3645033/3643160/3645897/3645964/3644077/3636513/3640999/3640285/3644478/3634845/3641389/3645137/3643877/3636874/3642502/3641342/3641888/3639324/3645866/3634879/3634859/3644719/3640713…	VPS1/PYC2/EBP1/CAALFM_CR06040WA/NAM2/PCK1/SWE1/TUF1/CDR2/CAALFM_C604450WA/IPK1/CAALFM_CR03110WA/FRS2/OYE2/ILS1/MYO5/CAALFM_C200700WA/CAALFM_C300030CA/CAALFM_C113060CA/OYE23/RNR1/AFG3/HST6/PKH3/ATM1/OYE32/CRL1/SUB2/CAALFM_C704260WA/GCN2/HXK1/ECM17/SRP101/PIM1/ALA1/RIA1/CAALFM_C109810WA/IFM1/CAALFM_CR03400WA/RPT6/RAD16/CAALFM_CR05970CA/CAALFM_C703200CA/MPS1/CCT8/CAALFM_C602230WA/TPK1/ERG12/CDC3/FUN…	87	33	3642656/3637323/3644836/3634866/3635265/3636824/3647404/3642288/3640238/3645897/3644478/3634845/3634879/3634859/3644719/3644552/3643927/3646497/3647784/3637922/3642459/3647601/3642097/3639688/3642794/3644581/3646668/3644838/3642789/3641716/3637911/3647921/3642917	54	3644060/3640275/3639701/3639360/3645982/3648091/3645124/3641603/3645956/3638884/3640571/3636123/3641618/3642989/3636589/3646075/3646284/3642919/3645033/3643160/3645964/3644077/3636513/3640999/3640285/3641389/3645137/3643877/3636874/3642502/3641342/3641888/3639324/3645866/3640713/3643673/3636398/3639691/3642981/3636636/3634792/3642643/3638014/3636419/3646086/3645873/3644440/3643294/3642603/3645878…
MF	GO:0030695	GTPase regulator activity	2/537	1990-12-01	0.767639	0.999726	3646953/3643298	TSC2/GDI1	2	1	3646953	1	3643298
MF	GO:0097367	carbohydrate derivative binding	87/537	429/2490	0.780369	0.999726	3642656/3637323/3644060/3644836/3640275/3639701/3634866/3639360/3635265/3645982/3648091/3645124/3636824/3641603/3645956/3647404/3638884/3640571/3636123/3641618/3642989/3636589/3642288/3646075/3646284/3642919/3640238/3645033/3643160/3645897/3645964/3644077/3636513/3640999/3640285/3644478/3634845/3641389/3645137/3643877/3636874/3642502/3641342/3641888/3639324/3645866/3634879/3634859/3644719/3640713…	VPS1/PYC2/EBP1/CAALFM_CR06040WA/NAM2/PCK1/SWE1/TUF1/CDR2/CAALFM_C604450WA/IPK1/CAALFM_CR03110WA/FRS2/OYE2/ILS1/MYO5/CAALFM_C200700WA/CAALFM_C300030CA/CAALFM_C113060CA/OYE23/RNR1/AFG3/HST6/PKH3/ATM1/OYE32/CRL1/SUB2/CAALFM_C704260WA/GCN2/HXK1/ECM17/SRP101/PIM1/ALA1/RIA1/CAALFM_C109810WA/IFM1/CAALFM_CR03400WA/RPT6/RAD16/CAALFM_CR05970CA/CAALFM_C703200CA/MPS1/CCT8/CAALFM_C602230WA/TPK1/ERG12/CDC3/FUN…	87	33	3642656/3637323/3644836/3634866/3635265/3636824/3647404/3642288/3640238/3645897/3644478/3634845/3634879/3634859/3644719/3644552/3643927/3646497/3647784/3637922/3642459/3647601/3642097/3639688/3642794/3644581/3646668/3644838/3642789/3641716/3637911/3647921/3642917	54	3644060/3640275/3639701/3639360/3645982/3648091/3645124/3641603/3645956/3638884/3640571/3636123/3641618/3642989/3636589/3646075/3646284/3642919/3645033/3643160/3645964/3644077/3636513/3640999/3640285/3641389/3645137/3643877/3636874/3642502/3641342/3641888/3639324/3645866/3640713/3643673/3636398/3639691/3642981/3636636/3634792/3642643/3638014/3636419/3646086/3645873/3644440/3643294/3642603/3645878…
MF	GO:0042578	phosphoric ester hydrolase activity	5/537	29/2490	0.782309	0.999726	3645626/3642985/3638940/3647858/3636505	CAALFM_C303860WA/PLC2/PTP3/PTP2/GDE1	5	4	3645626/3642985/3647858/3636505	1	3638940
MF	GO:0042623	ATPase activity, coupled	5/537	29/2490	0.782309	0.999726	3635265/3642288/3646284/3640999/3638014	CDR2/HST6/ATM1/PIM1/RAD3	5	2	3635265/3642288	3	3646284/3640999/3638014
MF	GO:0008324	cation transmembrane transporter activity	9/537	50/2490	0.782537	0.999726	3643318/3647141/3641209/3635752/3645017/3646070/3639546/3647441/3645022	FTR1/NHX1/CAALFM_C210720CA/CAALFM_C202180WA/MNR2/STV1/HAK1/MID1/MEP2	9	4	3641209/3635752/3639546/3647441	5	3643318/3647141/3645017/3646070/3645022
MF	GO:0000981	RNA polymerase II transcription factor activity, sequence-specific DNA binding	15/537	81/2490	0.790179	0.999726	3641635/3641740/3638534/3648000/3641370/3643511/3640208/3646988/3643754/3641886/3644691/3642915/3635666/3646354/3635788	ZCF18/ZCF35/ZFU2/ECM22/ZCF29/AFT2/STB5/FGR27/ZNC1/UGA33/WAR1/CZF1/ZCF26/ZCF13/CTF1	15	4	3641740/3648000/3642915/3635666	11	3641635/3638534/3641370/3643511/3640208/3646988/3643754/3641886/3644691/3646354/3635788
MF	GO:0016874	ligase activity	11/537	61/2490	0.796247	0.999726	3640275/3645124/3636824/3645956/3640285/3645137/3638906/3636398/3639691/3646086/3639688	NAM2/CAALFM_CR03110WA/FRS2/ILS1/ALA1/CAALFM_CR03400WA/CAALFM_C200170CA/MSM1/ARG1/CAALFM_C600390WA/ACC1	11	2	3636824/3639688	9	3640275/3645124/3645956/3640285/3645137/3638906/3636398/3639691/3646086
MF	GO:0019842	vitamin binding	6/537	35/2490	0.798582	0.999726	3636552/3647320/3635651/3638828/3643468/3647241	ILV2/ARO10/AAT22/ARO8/AAT1/AAT21	6	1	3647320	5	3636552/3635651/3638828/3643468/3647241
MF	GO:0017111	nucleoside-triphosphatase activity	20/537	107/2490	0.80338	0.999726	3642656/3639360/3635265/3647404/3636123/3642288/3646284/3640238/3643160/3636513/3640999/3644478/3641389/3640713/3643673/3643927/3638014/3642998/3641716/3642917	VPS1/TUF1/CDR2/MYO5/CAALFM_C113060CA/HST6/ATM1/CRL1/CAALFM_C704260WA/SRP101/PIM1/RIA1/IFM1/FUN12/DNM1/RAS1/RAD3/EFT2/KIP3/CAALFM_C406800WA	20	9	3642656/3635265/3647404/3642288/3640238/3644478/3643927/3641716/3642917	11	3639360/3636123/3646284/3643160/3636513/3640999/3641389/3640713/3643673/3638014/3642998
MF	GO:0004672	protein kinase activity	18/537	99/2490	0.831215	0.999726	3644836/3634866/3646075/3645897/3641888/3634879/3641358/3646497/3636636/3647784/3642643/3637922/3642459/3644838/3645878/3642789/3641611/3637394	CAALFM_CR06040WA/SWE1/PKH3/GCN2/MPS1/TPK1/NIK1/CAALFM_C108540CA/CAALFM_C302260CA/KIC1/SNF1/BUB1/CEK2/CDC28/HRR25/CEK1/PTK2/CHK1	18	10	3644836/3634866/3645897/3634879/3646497/3647784/3637922/3642459/3644838/3642789	8	3646075/3641888/3641358/3636636/3642643/3645878/3641611/3637394
MF	GO:0015399	primary active transmembrane transporter activity	3/537	21/2490	0.863164	0.999726	3635265/3642288/3646284	CDR2/HST6/ATM1	3	2	3635265/3642288	1	3646284
MF	GO:0015405	P-P-bond-hydrolysis-driven transmembrane transporter activity	3/537	21/2490	0.863164	0.999726	3635265/3642288/3646284	CDR2/HST6/ATM1	3	2	3635265/3642288	1	3646284
MF	GO:0042626	ATPase activity, coupled to transmembrane movement of substances	3/537	21/2490	0.863164	0.999726	3635265/3642288/3646284	CDR2/HST6/ATM1	3	2	3635265/3642288	1	3646284
MF	GO:0043492	ATPase activity, coupled to movement of substances	3/537	21/2490	0.863164	0.999726	3635265/3642288/3646284	CDR2/HST6/ATM1	3	2	3635265/3642288	1	3646284
MF	GO:0016462	pyrophosphatase activity	20/537	112/2490	0.86417	0.999726	3642656/3639360/3635265/3647404/3636123/3642288/3646284/3640238/3643160/3636513/3640999/3644478/3641389/3640713/3643673/3643927/3638014/3642998/3641716/3642917	VPS1/TUF1/CDR2/MYO5/CAALFM_C113060CA/HST6/ATM1/CRL1/CAALFM_C704260WA/SRP101/PIM1/RIA1/IFM1/FUN12/DNM1/RAS1/RAD3/EFT2/KIP3/CAALFM_C406800WA	20	9	3642656/3635265/3647404/3642288/3640238/3644478/3643927/3641716/3642917	11	3639360/3636123/3646284/3643160/3636513/3640999/3641389/3640713/3643673/3638014/3642998
MF	GO:0005506	iron ion binding	4/537	27/2490	0.86562	0.999726	3635693/3639700/3635716/3639699	CAALFM_C402230CA/ALK2/ERG251/CAALFM_CR00220WA	4	4	3635693/3639700/3635716/3639699	0
MF	GO:0016209	antioxidant activity	2/537	15/2490	0.866756	0.999726	3644010/3636507	CAALFM_C600850WA/CAALFM_C504530WA	2	0		2	3644010/3636507
MF	GO:0003700	DNA binding transcription factor activity	18/537	102/2490	0.866861	0.999726	3641635/3635261/3641740/3640990/3638534/3648000/3641370/3643511/3640208/3646988/3643754/3641886/3644691/3636640/3642915/3635666/3646354/3635788	ZCF18/TEC1/ZCF35/CAALFM_CR04250WA/ZFU2/ECM22/ZCF29/AFT2/STB5/FGR27/ZNC1/UGA33/WAR1/CAP1/CZF1/ZCF26/ZCF13/CTF1	18	5	3635261/3641740/3648000/3642915/3635666	13	3641635/3640990/3638534/3641370/3643511/3640208/3646988/3643754/3641886/3644691/3636640/3646354/3635788
MF	GO:0003899	DNA-directed 5'-3' RNA polymerase activity	3/537	22/2490	0.884005	0.999726	3639378/3638991/3641812	RPO41/RPO21/CAALFM_C405630WA	3	0		3	3639378/3638991/3641812
MF	GO:0015077	monovalent inorganic cation transmembrane transporter activity	3/537	22/2490	0.884005	0.999726	3647141/3646070/3639546	NHX1/STV1/HAK1	3	1	3639546	2	3647141/3646070
MF	GO:0034062	5'-3' RNA polymerase activity	3/537	22/2490	0.884005	0.999726	3639378/3638991/3641812	RPO41/RPO21/CAALFM_C405630WA	3	0		3	3639378/3638991/3641812
MF	GO:0097747	RNA polymerase activity	3/537	22/2490	0.884005	0.999726	3639378/3638991/3641812	RPO41/RPO21/CAALFM_C405630WA	3	0		3	3639378/3638991/3641812
MF	GO:0004386	helicase activity	2/537	16/2490	0.890014	0.999726	3638014/3642917	RAD3/CAALFM_C406800WA	2	1	3642917	1	3638014
MF	GO:0016301	kinase activity	22/537	125/2490	0.890422	0.999726	3644836/3634866/3648091/3643784/3646075/3645897/3641888/3634879/3641358/3646497/3636636/3647784/3642643/3644533/3637922/3642459/3644838/3645878/3642789/3641611/3647957/3637394	CAALFM_CR06040WA/SWE1/IPK1/IPK2/PKH3/GCN2/MPS1/TPK1/NIK1/CAALFM_C108540CA/CAALFM_C302260CA/KIC1/SNF1/ADK1/BUB1/CEK2/CDC28/HRR25/CEK1/PTK2/MSS4/CHK1	22	12	3644836/3634866/3643784/3645897/3634879/3646497/3647784/3637922/3642459/3644838/3642789/3647957	10	3648091/3646075/3641888/3641358/3636636/3642643/3644533/3645878/3641611/3637394
MF	GO:0016818	hydrolase activity, acting on acid anhydrides, in phosphorus-containing anhydrides	20/537	115/2490	0.893055	0.999726	3642656/3639360/3635265/3647404/3636123/3642288/3646284/3640238/3643160/3636513/3640999/3644478/3641389/3640713/3643673/3643927/3638014/3642998/3641716/3642917	VPS1/TUF1/CDR2/MYO5/CAALFM_C113060CA/HST6/ATM1/CRL1/CAALFM_C704260WA/SRP101/PIM1/RIA1/IFM1/FUN12/DNM1/RAS1/RAD3/EFT2/KIP3/CAALFM_C406800WA	20	9	3642656/3635265/3647404/3642288/3640238/3644478/3643927/3641716/3642917	11	3639360/3636123/3646284/3643160/3636513/3640999/3641389/3640713/3643673/3638014/3642998
MF	GO:0030170	pyridoxal phosphate binding	4/537	29/2490	0.900499	0.999726	3635651/3638828/3643468/3647241	AAT22/ARO8/AAT1/AAT21	4	0		4	3635651/3638828/3643468/3647241
MF	GO:0070279	vitamin B6 binding	4/537	29/2490	0.900499	0.999726	3635651/3638828/3643468/3647241	AAT22/ARO8/AAT1/AAT21	4	0		4	3635651/3638828/3643468/3647241
MF	GO:0017076	purine nucleotide binding	80/537	414/2490	0.900822	0.999726	3642656/3637323/3644836/3640275/3639701/3634866/3639360/3635265/3645982/3648091/3640133/3645124/3636824/3645956/3647404/3638884/3640571/3636123/3642989/3636589/3642288/3646075/3646284/3640238/3645033/3643160/3645897/3645964/3636513/3640999/3640285/3644478/3634845/3641389/3645137/3643877/3636874/3642502/3641888/3639324/3645866/3634879/3634859/3644719/3640713/3644552/3643673/3643927/3636398/3639691…	VPS1/PYC2/CAALFM_CR06040WA/NAM2/PCK1/SWE1/TUF1/CDR2/CAALFM_C604450WA/IPK1/MGE1/CAALFM_CR03110WA/FRS2/ILS1/MYO5/CAALFM_C200700WA/CAALFM_C300030CA/CAALFM_C113060CA/RNR1/AFG3/HST6/PKH3/ATM1/CRL1/SUB2/CAALFM_C704260WA/GCN2/HXK1/SRP101/PIM1/ALA1/RIA1/CAALFM_C109810WA/IFM1/CAALFM_CR03400WA/RPT6/RAD16/CAALFM_CR05970CA/MPS1/CCT8/CAALFM_C602230WA/TPK1/ERG12/CDC3/FUN12/CAALFM_C111300CA/DNM1/RAS1/MSM1/ARG1/…	80	32	3642656/3637323/3644836/3634866/3635265/3636824/3647404/3642288/3640238/3645897/3644478/3634845/3634879/3634859/3644719/3644552/3643927/3646497/3647784/3637922/3642459/3647601/3642097/3639688/3642794/3644581/3646668/3644838/3642789/3641716/3637911/3642917	48	3640275/3639701/3639360/3645982/3648091/3640133/3645124/3645956/3638884/3640571/3636123/3642989/3636589/3646075/3646284/3645033/3643160/3645964/3636513/3640999/3640285/3641389/3645137/3643877/3636874/3642502/3641888/3639324/3645866/3640713/3643673/3636398/3639691/3642981/3636636/3634792/3642643/3638014/3636419/3646086/3644440/3643294/3642603/3645878/3642998/3640966/3641611/3637394
MF	GO:0032555	purine ribonucleotide binding	79/537	410/2490	0.904881	0.999726	3642656/3637323/3644836/3640275/3639701/3634866/3639360/3635265/3645982/3648091/3645124/3636824/3645956/3647404/3638884/3640571/3636123/3642989/3636589/3642288/3646075/3646284/3640238/3645033/3643160/3645897/3645964/3636513/3640999/3640285/3644478/3634845/3641389/3645137/3643877/3636874/3642502/3641888/3639324/3645866/3634879/3634859/3644719/3640713/3644552/3643673/3643927/3636398/3639691/3646497…	VPS1/PYC2/CAALFM_CR06040WA/NAM2/PCK1/SWE1/TUF1/CDR2/CAALFM_C604450WA/IPK1/CAALFM_CR03110WA/FRS2/ILS1/MYO5/CAALFM_C200700WA/CAALFM_C300030CA/CAALFM_C113060CA/RNR1/AFG3/HST6/PKH3/ATM1/CRL1/SUB2/CAALFM_C704260WA/GCN2/HXK1/SRP101/PIM1/ALA1/RIA1/CAALFM_C109810WA/IFM1/CAALFM_CR03400WA/RPT6/RAD16/CAALFM_CR05970CA/MPS1/CCT8/CAALFM_C602230WA/TPK1/ERG12/CDC3/FUN12/CAALFM_C111300CA/DNM1/RAS1/MSM1/ARG1/CAALF…	79	32	3642656/3637323/3644836/3634866/3635265/3636824/3647404/3642288/3640238/3645897/3644478/3634845/3634879/3634859/3644719/3644552/3643927/3646497/3647784/3637922/3642459/3647601/3642097/3639688/3642794/3644581/3646668/3644838/3642789/3641716/3637911/3642917	47	3640275/3639701/3639360/3645982/3648091/3645124/3645956/3638884/3640571/3636123/3642989/3636589/3646075/3646284/3645033/3643160/3645964/3636513/3640999/3640285/3641389/3645137/3643877/3636874/3642502/3641888/3639324/3645866/3640713/3643673/3636398/3639691/3642981/3636636/3634792/3642643/3638014/3636419/3646086/3644440/3643294/3642603/3645878/3642998/3640966/3641611/3637394
MF	GO:0035639	purine ribonucleoside triphosphate binding	79/537	410/2490	0.904881	0.999726	3642656/3637323/3644836/3640275/3639701/3634866/3639360/3635265/3645982/3648091/3645124/3636824/3645956/3647404/3638884/3640571/3636123/3642989/3636589/3642288/3646075/3646284/3640238/3645033/3643160/3645897/3645964/3636513/3640999/3640285/3644478/3634845/3641389/3645137/3643877/3636874/3642502/3641888/3639324/3645866/3634879/3634859/3644719/3640713/3644552/3643673/3643927/3636398/3639691/3646497…	VPS1/PYC2/CAALFM_CR06040WA/NAM2/PCK1/SWE1/TUF1/CDR2/CAALFM_C604450WA/IPK1/CAALFM_CR03110WA/FRS2/ILS1/MYO5/CAALFM_C200700WA/CAALFM_C300030CA/CAALFM_C113060CA/RNR1/AFG3/HST6/PKH3/ATM1/CRL1/SUB2/CAALFM_C704260WA/GCN2/HXK1/SRP101/PIM1/ALA1/RIA1/CAALFM_C109810WA/IFM1/CAALFM_CR03400WA/RPT6/RAD16/CAALFM_CR05970CA/MPS1/CCT8/CAALFM_C602230WA/TPK1/ERG12/CDC3/FUN12/CAALFM_C111300CA/DNM1/RAS1/MSM1/ARG1/CAALF…	79	32	3642656/3637323/3644836/3634866/3635265/3636824/3647404/3642288/3640238/3645897/3644478/3634845/3634879/3634859/3644719/3644552/3643927/3646497/3647784/3637922/3642459/3647601/3642097/3639688/3642794/3644581/3646668/3644838/3642789/3641716/3637911/3642917	47	3640275/3639701/3639360/3645982/3648091/3645124/3645956/3638884/3640571/3636123/3642989/3636589/3646075/3646284/3645033/3643160/3645964/3636513/3640999/3640285/3641389/3645137/3643877/3636874/3642502/3641888/3639324/3645866/3640713/3643673/3636398/3639691/3642981/3636636/3634792/3642643/3638014/3636419/3646086/3644440/3643294/3642603/3645878/3642998/3640966/3641611/3637394
MF	GO:0016817	hydrolase activity, acting on acid anhydrides	20/537	117/2490	0.909441	0.999726	3642656/3639360/3635265/3647404/3636123/3642288/3646284/3640238/3643160/3636513/3640999/3644478/3641389/3640713/3643673/3643927/3638014/3642998/3641716/3642917	VPS1/TUF1/CDR2/MYO5/CAALFM_C113060CA/HST6/ATM1/CRL1/CAALFM_C704260WA/SRP101/PIM1/RIA1/IFM1/FUN12/DNM1/RAS1/RAD3/EFT2/KIP3/CAALFM_C406800WA	20	9	3642656/3635265/3647404/3642288/3640238/3644478/3643927/3641716/3642917	11	3639360/3636123/3646284/3643160/3636513/3640999/3641389/3640713/3643673/3638014/3642998
MF	GO:0000287	magnesium ion binding	2/537	17/2490	0.909457	0.999726	3636552/3634762	ILV2/PPT2	2	1	3634762	1	3636552
MF	GO:0004252	serine-type endopeptidase activity	1/537	1990-10-01	0.912327	0.999726	3640999	PIM1	1	0		1	3640999
MF	GO:0008238	exopeptidase activity	1/537	1990-10-01	0.912327	0.999726	3643299	CAALFM_C114450CA	1	0		1	3643299
MF	GO:0016684	oxidoreductase activity, acting on peroxide as acceptor	1/537	1990-10-01	0.912327	0.999726	3644010	CAALFM_C600850WA	1	0		1	3644010
MF	GO:0016765	transferase activity, transferring alkyl or aryl (other than methyl) groups	1/537	1990-10-01	0.912327	0.999726	3643769	CAALFM_C502040WA	1	0		1	3643769
MF	GO:0000988	transcription factor activity, protein binding	3/537	24/2490	0.917388	0.999726	3636918/3635777/3644103	MED17/OPI1/MED18	3	2	3635777/3644103	1	3636918
MF	GO:0000989	transcription factor activity, transcription factor binding	3/537	24/2490	0.917388	0.999726	3636918/3635777/3644103	MED17/OPI1/MED18	3	2	3635777/3644103	1	3636918
MF	GO:0003712	transcription cofactor activity	3/537	24/2490	0.917388	0.999726	3636918/3635777/3644103	MED17/OPI1/MED18	3	2	3635777/3644103	1	3636918
MF	GO:0008135	translation factor activity, RNA binding	2/537	18/2490	0.925646	0.999726	3642478/3641648	CAALFM_C105400CA/ANB1	2	0		2	3642478/3641648
MF	GO:0009055	electron transfer activity	2/537	18/2490	0.925646	0.999726	3646660/3639313	CAALFM_C107630WA/TTR1	2	0		2	3646660/3639313
MF	GO:0030554	adenyl nucleotide binding	64/537	342/2490	0.928365	0.999726	3637323/3644836/3640275/3639701/3634866/3635265/3648091/3640133/3645124/3636824/3645956/3647404/3638884/3640571/3642989/3636589/3642288/3646075/3646284/3645033/3645897/3645964/3640999/3640285/3645137/3643877/3636874/3642502/3641888/3639324/3634879/3634859/3644552/3636398/3639691/3646497/3642981/3636636/3634792/3647784/3642643/3637922/3638014/3636419/3642459/3647601/3646086/3642097/3639688/3642794…	PYC2/CAALFM_CR06040WA/NAM2/PCK1/SWE1/CDR2/IPK1/MGE1/CAALFM_CR03110WA/FRS2/ILS1/MYO5/CAALFM_C200700WA/CAALFM_C300030CA/RNR1/AFG3/HST6/PKH3/ATM1/SUB2/GCN2/HXK1/PIM1/ALA1/CAALFM_CR03400WA/RPT6/RAD16/CAALFM_CR05970CA/MPS1/CCT8/TPK1/ERG12/CAALFM_C111300CA/MSM1/ARG1/CAALFM_C108540CA/PR26/CAALFM_C302260CA/MSS116/KIC1/SNF1/BUB1/RAD3/CAALFM_C504920CA/CEK2/CHR1/CAALFM_C600390WA/HSP104/ACC1/CAALFM_C406430CA…	64	26	3637323/3644836/3634866/3635265/3636824/3647404/3642288/3645897/3634879/3634859/3644552/3646497/3647784/3637922/3642459/3647601/3642097/3639688/3642794/3644581/3646668/3644838/3642789/3641716/3637911/3642917	38	3640275/3639701/3648091/3640133/3645124/3645956/3638884/3640571/3642989/3636589/3646075/3646284/3645033/3645964/3640999/3640285/3645137/3643877/3636874/3642502/3641888/3639324/3636398/3639691/3642981/3636636/3634792/3642643/3638014/3636419/3646086/3644440/3643294/3642603/3645878/3640966/3641611/3637394
MF	GO:0016773	phosphotransferase activity, alcohol group as acceptor	21/537	125/2490	0.92856	0.999726	3644836/3634866/3648091/3646075/3645897/3645964/3641888/3634879/3641358/3646497/3636636/3647784/3642643/3637922/3642459/3644838/3645878/3642789/3641611/3647957/3637394	CAALFM_CR06040WA/SWE1/IPK1/PKH3/GCN2/HXK1/MPS1/TPK1/NIK1/CAALFM_C108540CA/CAALFM_C302260CA/KIC1/SNF1/BUB1/CEK2/CDC28/HRR25/CEK1/PTK2/MSS4/CHK1	21	11	3644836/3634866/3645897/3634879/3646497/3647784/3637922/3642459/3644838/3642789/3647957	10	3648091/3646075/3645964/3641888/3641358/3636636/3642643/3645878/3641611/3637394
MF	GO:0003779	actin binding	1/537	1990-11-01	0.931311	0.999726	3637875	ABP1	1	1	3637875	0
MF	GO:0140110	transcription regulator activity	21/537	126/2490	0.934523	0.999726	3641635/3635261/3641740/3640990/3638534/3648000/3641370/3643511/3636918/3640208/3646988/3643754/3641886/3644691/3636640/3642915/3635666/3646354/3635777/3635788/3644103	ZCF18/TEC1/ZCF35/CAALFM_CR04250WA/ZFU2/ECM22/ZCF29/AFT2/MED17/STB5/FGR27/ZNC1/UGA33/WAR1/CAP1/CZF1/ZCF26/ZCF13/OPI1/CTF1/MED18	21	7	3635261/3641740/3648000/3642915/3635666/3635777/3644103	14	3641635/3640990/3638534/3641370/3643511/3636918/3640208/3646988/3643754/3641886/3644691/3636640/3646354/3635788
MF	GO:0016746	transferase activity, transferring acyl groups	4/537	32/2490	0.937894	0.999726	3645575/3639339/3646036/3643808	GWT1/LEU4/KGD2/LEU42	4	1	3645575	3	3639339/3646036/3643808
MF	GO:0005524	ATP binding	63/537	340/2490	0.939526	0.999726	3637323/3644836/3640275/3639701/3634866/3635265/3648091/3645124/3636824/3645956/3647404/3638884/3640571/3642989/3636589/3642288/3646075/3646284/3645033/3645897/3645964/3640999/3640285/3645137/3643877/3636874/3642502/3641888/3639324/3634879/3634859/3644552/3636398/3639691/3646497/3642981/3636636/3634792/3647784/3642643/3637922/3638014/3636419/3642459/3647601/3646086/3642097/3639688/3642794/3644581…	PYC2/CAALFM_CR06040WA/NAM2/PCK1/SWE1/CDR2/IPK1/CAALFM_CR03110WA/FRS2/ILS1/MYO5/CAALFM_C200700WA/CAALFM_C300030CA/RNR1/AFG3/HST6/PKH3/ATM1/SUB2/GCN2/HXK1/PIM1/ALA1/CAALFM_CR03400WA/RPT6/RAD16/CAALFM_CR05970CA/MPS1/CCT8/TPK1/ERG12/CAALFM_C111300CA/MSM1/ARG1/CAALFM_C108540CA/PR26/CAALFM_C302260CA/MSS116/KIC1/SNF1/BUB1/RAD3/CAALFM_C504920CA/CEK2/CHR1/CAALFM_C600390WA/HSP104/ACC1/CAALFM_C406430CA/GAL1…	63	26	3637323/3644836/3634866/3635265/3636824/3647404/3642288/3645897/3634879/3634859/3644552/3646497/3647784/3637922/3642459/3647601/3642097/3639688/3642794/3644581/3646668/3644838/3642789/3641716/3637911/3642917	37	3640275/3639701/3648091/3645124/3645956/3638884/3640571/3642989/3636589/3646075/3646284/3645033/3645964/3640999/3640285/3645137/3643877/3636874/3642502/3641888/3639324/3636398/3639691/3642981/3636636/3634792/3642643/3638014/3636419/3646086/3644440/3643294/3642603/3645878/3640966/3641611/3637394
MF	GO:0032559	adenyl ribonucleotide binding	63/537	340/2490	0.939526	0.999726	3637323/3644836/3640275/3639701/3634866/3635265/3648091/3645124/3636824/3645956/3647404/3638884/3640571/3642989/3636589/3642288/3646075/3646284/3645033/3645897/3645964/3640999/3640285/3645137/3643877/3636874/3642502/3641888/3639324/3634879/3634859/3644552/3636398/3639691/3646497/3642981/3636636/3634792/3647784/3642643/3637922/3638014/3636419/3642459/3647601/3646086/3642097/3639688/3642794/3644581…	PYC2/CAALFM_CR06040WA/NAM2/PCK1/SWE1/CDR2/IPK1/CAALFM_CR03110WA/FRS2/ILS1/MYO5/CAALFM_C200700WA/CAALFM_C300030CA/RNR1/AFG3/HST6/PKH3/ATM1/SUB2/GCN2/HXK1/PIM1/ALA1/CAALFM_CR03400WA/RPT6/RAD16/CAALFM_CR05970CA/MPS1/CCT8/TPK1/ERG12/CAALFM_C111300CA/MSM1/ARG1/CAALFM_C108540CA/PR26/CAALFM_C302260CA/MSS116/KIC1/SNF1/BUB1/RAD3/CAALFM_C504920CA/CEK2/CHR1/CAALFM_C600390WA/HSP104/ACC1/CAALFM_C406430CA/GAL1…	63	26	3637323/3644836/3634866/3635265/3636824/3647404/3642288/3645897/3634879/3634859/3644552/3646497/3647784/3637922/3642459/3647601/3642097/3639688/3642794/3644581/3646668/3644838/3642789/3641716/3637911/3642917	37	3640275/3639701/3648091/3645124/3645956/3638884/3640571/3642989/3636589/3646075/3646284/3645033/3645964/3640999/3640285/3645137/3643877/3636874/3642502/3641888/3639324/3636398/3639691/3642981/3636636/3634792/3642643/3638014/3636419/3646086/3644440/3643294/3642603/3645878/3640966/3641611/3637394
MF	GO:0005509	calcium ion binding	1/537	1990-12-01	0.946191	0.999726	3637426	CAALFM_C203910CA	1	0		1	3637426
MF	GO:0008047	enzyme activator activity	1/537	1990-12-01	0.946191	0.999726	3646953	TSC2	1	1	3646953	0
MF	GO:0017016	Ras GTPase binding	1/537	1990-12-01	0.946191	0.999726	3637434	ROM2	1	0		1	3637434
MF	GO:0031267	small GTPase binding	1/537	1990-12-01	0.946191	0.999726	3637434	ROM2	1	0		1	3637434
MF	GO:0015078	proton transmembrane transporter activity	2/537	20/2490	0.950186	0.999726	3647141/3646070	NHX1/STV1	2	0		2	3647141/3646070
MF	GO:0051020	GTPase binding	2/537	20/2490	0.950186	0.999726	3637434/3635220	ROM2/SEC7	2	1	3635220	1	3637434
MF	GO:0098772	molecular function regulator	5/537	40/2490	0.953138	0.999726	3640133/3637434/3646953/3643298/3635220	MGE1/ROM2/TSC2/GDI1/SEC7	5	2	3646953/3635220	3	3640133/3637434/3643298
MF	GO:0016879	ligase activity, forming carbon-nitrogen bonds	1/537	13/2490	0.957851	0.999726	3639691	ARG1	1	0		1	3639691
MF	GO:0005515	protein binding	83/537	445/2490	0.958143	0.999726	3636176/3646292/3644027/3647894/3644042/3640133/3636572/3644556/3647404/3639213/3643443/3636862/3637875/3646279/3643295/3643420/3647327/3646554/3641933/3645897/3647228/3645870/3639254/3638301/3639499/3641251/3637052/3640294/3640384/3638420/3635769/3642978/3642934/3644716/3637434/3648118/3645376/3641644/3647326/3639245/3643469/3635826/3644705/3643326/3638414/3640136/3644767/3642828/3640129/3644450…	CAALFM_C112830CA/FLO8/PEX7/VID27/CAALFM_C601220CA/MGE1/BZZ1/CAALFM_C111250WA/MYO5/SAC6/ABP2/CAALFM_C102850WA/ABP1/CAALFM_C604280WA/DDI1/CAALFM_C205510CA/HHF22/SCP1/CAALFM_CR09410WA/GCN2/BUD7/SEC27/POL5/GTT13/CAALFM_C106340WA/CAALFM_C210670WA/IQG1/SKI8/CAALFM_CR01050CA/TFC4/CAALFM_C202020WA/SGT2/UBI3/CAALFM_C104180WA/ROM2/CAALFM_C106320WA/CAALFM_C403530WA/TRA1/HHT2/CAALFM_C602790CA/BUD14/HOM2/HHF1…	83	46	3636176/3636572/3644556/3647404/3639213/3643443/3636862/3637875/3643420/3647327/3646554/3641933/3645897/3647228/3638301/3639499/3637052/3640384/3638420/3644716/3647326/3643469/3644705/3638414/3640136/3644767/3642828/3640129/3644450/3644707/3637740/3643779/3640113/3644423/3646524/3636203/3639284/3635220/3645659/3639044/3644715/3636134/3640178/3641716/3638322/3644433	37	3646292/3644027/3647894/3644042/3640133/3646279/3643295/3645870/3639254/3641251/3640294/3635769/3642978/3642934/3637434/3648118/3645376/3641644/3639245/3635826/3643326/3645973/3645026/3645907/3639317/3641623/3647528/3640083/3639169/3641554/3641812/3636859/3639369/3638433/3646088/3644057/3644068
MF	GO:0016887	ATPase activity	5/537	41/2490	0.959846	0.999726	3635265/3642288/3646284/3640999/3638014	CDR2/HST6/ATM1/PIM1/RAD3	5	2	3635265/3642288	3	3646284/3640999/3638014
MF	GO:0008144	drug binding	67/537	369/2490	0.965331	0.999726	3637323/3644836/3640275/3639701/3634866/3635265/3648091/3645124/3636824/3645956/3647404/3638884/3640571/3642989/3636589/3642288/3646075/3646284/3645033/3645897/3645964/3640999/3640285/3635651/3645137/3643877/3636874/3642502/3641888/3639324/3634879/3634859/3644552/3638828/3636398/3639691/3646497/3642981/3636636/3634792/3647784/3642643/3637922/3638014/3636419/3642459/3647601/3646086/3643468/3642097…	PYC2/CAALFM_CR06040WA/NAM2/PCK1/SWE1/CDR2/IPK1/CAALFM_CR03110WA/FRS2/ILS1/MYO5/CAALFM_C200700WA/CAALFM_C300030CA/RNR1/AFG3/HST6/PKH3/ATM1/SUB2/GCN2/HXK1/PIM1/ALA1/AAT22/CAALFM_CR03400WA/RPT6/RAD16/CAALFM_CR05970CA/MPS1/CCT8/TPK1/ERG12/CAALFM_C111300CA/ARO8/MSM1/ARG1/CAALFM_C108540CA/PR26/CAALFM_C302260CA/MSS116/KIC1/SNF1/BUB1/RAD3/CAALFM_C504920CA/CEK2/CHR1/CAALFM_C600390WA/AAT1/HSP104/ACC1/CAALF…	67	26	3637323/3644836/3634866/3635265/3636824/3647404/3642288/3645897/3634879/3634859/3644552/3646497/3647784/3637922/3642459/3647601/3642097/3639688/3642794/3644581/3646668/3644838/3642789/3641716/3637911/3642917	41	3640275/3639701/3648091/3645124/3645956/3638884/3640571/3642989/3636589/3646075/3646284/3645033/3645964/3640999/3640285/3635651/3645137/3643877/3636874/3642502/3641888/3639324/3638828/3636398/3639691/3642981/3636636/3634792/3642643/3638014/3636419/3646086/3643468/3647241/3644440/3643294/3642603/3645878/3640966/3641611/3637394
MF	GO:0030234	enzyme regulator activity	3/537	29/2490	0.966149	0.999726	3640133/3646953/3643298	MGE1/TSC2/GDI1	3	1	3646953	2	3640133/3643298
MF	GO:0008236	serine-type peptidase activity	1/537	16/2490	0.979758	0.999726	3640999	PIM1	1	0		1	3640999
MF	GO:0017171	serine hydrolase activity	1/537	16/2490	0.979758	0.999726	3640999	PIM1	1	0		1	3640999
MF	GO:0019899	enzyme binding	2/537	28/2490	0.990611	0.999726	3637434/3635220	ROM2/SEC7	2	1	3635220	1	3637434
MF	GO:0016779	nucleotidyltransferase activity	4/537	44/2490	0.992199	0.999726	3639378/3638991/3641812/3639234	RPO41/RPO21/CAALFM_C405630WA/APA2	4	0		4	3639378/3638991/3641812/3639234
MF	GO:0016772	transferase activity, transferring phosphorus-containing groups	29/537	195/2490	0.994563	0.999726	3644557/3644836/3634866/3648091/3643784/3639378/3646075/3645897/3645964/3634762/3638991/3641888/3634879/3641358/3646497/3636636/3647784/3642643/3644533/3637922/3642459/3641812/3644838/3645878/3639234/3642789/3641611/3647957/3637394	CHO1/CAALFM_CR06040WA/SWE1/IPK1/IPK2/RPO41/PKH3/GCN2/HXK1/PPT2/RPO21/MPS1/TPK1/NIK1/CAALFM_C108540CA/CAALFM_C302260CA/KIC1/SNF1/ADK1/BUB1/CEK2/CAALFM_C405630WA/CDC28/HRR25/APA2/CEK1/PTK2/MSS4/CHK1	29	14	3644557/3644836/3634866/3643784/3645897/3634762/3634879/3646497/3647784/3637922/3642459/3644838/3642789/3647957	15	3648091/3639378/3646075/3645964/3638991/3641888/3641358/3636636/3642643/3644533/3641812/3645878/3639234/3641611/3637394
MF	GO:0016741	transferase activity, transferring one-carbon groups	3/537	50/2490	0.99948	0.999726	3639180/3636655/3638471	ARG3/ERG6/CAALFM_C307400WA	3	1	3638471	2	3639180/3636655
MF	GO:0016740	transferase activity	57/537	370/2490	0.9995	0.999726	3639182/3639258/3637784/3644557/3644836/3634866/3648091/3643784/3638357/3642282/3646425/3645575/3639180/3639378/3646075/3643486/3645897/3645964/3634762/3640429/3644405/3635164/3638991/3639339/3646036/3641888/3634879/3640439/3643674/3641358/3646497/3636636/3647784/3636488/3642643/3636655/3643928/3644533/3637922/3641117/3646158/3642459/3643769/3645443/3641812/3643808/3644838/3638789/3645878/3644794…	BMT4/BMT6/MNN1/CHO1/CAALFM_CR06040WA/SWE1/IPK1/IPK2/BMT7/GLG2/KTR4/GWT1/ARG3/RPO41/PKH3/CAALFM_C207240CA/GCN2/HXK1/PPT2/CAALFM_CR01170WA/MNN2/CAALFM_C304970CA/RPO21/LEU4/KGD2/MPS1/TPK1/BMT3/DIE2/NIK1/CAALFM_C108540CA/CAALFM_C302260CA/KIC1/CAALFM_C505040WA/SNF1/ERG6/CAALFM_C210200WA/ADK1/BUB1/MNN22/CAALFM_C405250WA/CEK2/CAALFM_C502040WA/KTR2/CAALFM_C405630WA/LEU42/CDC28/MNN24/HRR25/MNN15/APA2/CEK1…	57	31	3639182/3639258/3637784/3644557/3644836/3634866/3643784/3638357/3642282/3646425/3645575/3643486/3645897/3634762/3634879/3640439/3643674/3646497/3647784/3636488/3643928/3637922/3646158/3642459/3644838/3638789/3644794/3642789/3635743/3647957/3638471	26	3648091/3639180/3639378/3646075/3645964/3640429/3644405/3635164/3638991/3639339/3646036/3641888/3641358/3636636/3642643/3636655/3644533/3641117/3643769/3645443/3641812/3643808/3645878/3639234/3641611/3637394
MF	GO:0008168	methyltransferase activity	2/537	44/2490	0.999726	0.999726	3636655/3638471	ERG6/CAALFM_C307400WA	2	1	3638471	1	3636655
