# Supplementary material for: Genetic Insights into the Rheological Phenotype of Candida albicans Biofilms
Source: Research Square preprint supplement (doi:10.21203/rs.3.rs-8555167/v1), 2026-01-20
Supplement: Supplementary file 8 [file 944bb47e2d3225d86a81e4eb.xlsx]

## Sheet: kre5_delvsWT.all_KEGGenrich
Transcriptional profiling (KEGG term enrichment) -- kre5∆/∆ vs wild type
KEGGID	Description	GeneRatio	BgRatio	pvalue	padj	geneID	geneName	keggID	Count	Up	Up_Gene_id	Down	Down_Gene_id
cal03050	Proteasome	20/436	36/1949	1.29542e-05	0.0012177	30515395/3645795/3638311/3646718/3640510/3643326/3643877/3642027/3643490/3641906/3643111/3636957/3638846/3642981/3641909/3644722/3636917/3643770/3642461/3643660	PRE6/CAALFM_C208930WA/PRE9/PUP3/SCL1/CAALFM_C114460WA/RPT6/RPN2/PRE2/PRE8/PRE5/PRE10/CAALFM_C201320WA/PR26/RPN7/CAALFM_C104230WA/RPN3/RPN8/RPT1/PRE3	cal:CAALFM_CR04550WA/cal:CAALFM_C208930WA/cal:CAALFM_C303520CA/cal:CAALFM_C703390CA/cal:CAALFM_C300770CA/cal:CAALFM_C114460WA/cal:CAALFM_C208780WA/cal:CAALFM_C112050WA/cal:CAALFM_C206820CA/cal:CAALFM_CR09380WA/cal:CAALFM_C704020CA/cal:CAALFM_C701470CA/cal:CAALFM_C201320WA/cal:CAALFM_C203060WA/cal:CAALFM_CR08910CA/cal:CAALFM_C104230WA/cal:CAALFM_C103520WA/cal:CAALFM_C502030WA/cal:CAALFM_C105240CA/…	20	0		20	30515395/3645795/3638311/3646718/3640510/3643326/3643877/3642027/3643490/3641906/3643111/3636957/3638846/3642981/3641909/3644722/3636917/3643770/3642461/3643660
cal00650	Butanoate metabolism	8/436	14/1949	0.00488716	0.214752	3637437/3648027/3643486/3637329/3640574/3638306/3644778/3641881	UGA11/IFE2/CAALFM_C207240CA/UGA1/CAALFM_C300640WA/CAALFM_C303470WA/IFE1/ERG13	cal:CAALFM_C203640WA/cal:CAALFM_CR05340CA/cal:CAALFM_C207240CA/cal:CAALFM_C204190CA/cal:CAALFM_C300640WA/cal:CAALFM_C303470WA/cal:CAALFM_C104750WA/cal:CAALFM_CR09160CA	8	3	3637437/3643486/3644778	5	3648027/3637329/3640574/3638306/3641881
cal00970	Aminoacyl-tRNA biosynthesis	15/436	38/1949	0.0124181	0.214752	3636831/3645124/3645956/3640285/3640121/3640275/3647882/3645137/3638029/3636532/3636516/3636398/3640128/3638486/3640232	MST1/CAALFM_CR03110WA/ILS1/ALA1/FRS1/NAM2/THS1/CAALFM_CR03400WA/GUS1/HTS1/MES1/MSM1/CDC60/KRS1/CAALFM_C101530CA	cal:CAALFM_C102930CA/cal:CAALFM_CR03110WA/cal:CAALFM_C604520WA/cal:CAALFM_C603720WA/cal:CAALFM_CR01760CA/cal:CAALFM_C603450CA/cal:CAALFM_C500110CA/cal:CAALFM_CR03400WA/cal:CAALFM_C700620WA/cal:CAALFM_C505490CA/cal:CAALFM_C504700CA/cal:CAALFM_C504650CA/cal:CAALFM_CR01690CA/cal:CAALFM_C307410CA/cal:CAALFM_C101530CA	15	1	3636532	14	3636831/3645124/3645956/3640285/3640121/3640275/3647882/3645137/3638029/3636516/3636398/3640128/3638486/3640232
cal01240	Biosynthesis of cofactors	37/436	118/1949	0.0126443	0.214752	3636649/3640306/3644863/3647071/3639287/3645124/3641640/3641921/3643520/3644538/3643769/3648307/3635715/3636954/3645728/3646232/3647454/3646827/3640949/3641342/3642607/3647390/3638029/3636499/3644533/3636459/3641233/3634930/3645732/3647988/3647519/3638333/3646037/3643176/3640440/3643909/3637746	URA3/SHM2/ADE13/COX15/CAALFM_C100410CA/CAALFM_CR03110WA/CAALFM_C601750CA/THI13/PST1/SAM2/CAALFM_C502040WA/ABZ1/CPA1/CAALFM_C702010CA/URA2/PNC1/SRB1/CAALFM_C112810WA/PDX3/CAALFM_C703200CA/RIB1/HEM13/GUS1/RIB5/ADK1/CAALFM_C505130CA/CAALFM_C210860CA/FAD1/MIS11/URA6/BUD16/THI6/LPD1/CAALFM_CR03740CA/CAALFM_CR00710CA/PST2/YNK1	cal:CAALFM_C301350CA/cal:CAALFM_C603760CA/cal:CAALFM_CR06150CA/cal:CAALFM_C600720CA/cal:CAALFM_C100410CA/cal:CAALFM_CR03110WA/cal:CAALFM_C601750CA/cal:CAALFM_CR09290WA/cal:CAALFM_C206870CA/cal:CAALFM_C111450CA/cal:CAALFM_C502040WA/cal:CAALFM_C405290WA/cal:CAALFM_C401550CA/cal:CAALFM_C702010CA/cal:CAALFM_CR07050CA/cal:CAALFM_C703520WA/cal:CAALFM_C307950CA/cal:CAALFM_C112810WA/cal:CAALFM_CR04590CA/…	37	14	3636649/3639287/3641921/3643520/3648307/3635715/3636954/3646232/3636499/3636459/3647519/3638333/3640440/3643909	23	3640306/3644863/3647071/3645124/3641640/3644538/3643769/3645728/3647454/3646827/3640949/3641342/3642607/3647390/3638029/3644533/3641233/3634930/3645732/3647988/3646037/3643176/3637746
cal00230	Purine metabolism	19/436	52/1949	0.0132315	0.214752	3644863/3640564/3647304/3641769/3646847/3642989/3639274/3640719/3641407/3635594/3642808/3635842/3643529/3643021/3644533/3635259/3639234/3637746/3634763	ADE13/DAL1/ADE6/ADE4/CAALFM_C404270WA/RNR1/ADO1/ADE5%2C7/CYR1/CAALFM_C401820CA/CAALFM_C406230CA/APT1/AAH1/RNR21/ADK1/ADE2/APA2/YNK1/GUA1	cal:CAALFM_CR06150CA/cal:CAALFM_C300180CA/cal:CAALFM_CR04740CA/cal:CAALFM_C107710CA/cal:CAALFM_C404270WA/cal:CAALFM_C203160CA/cal:CAALFM_C603080CA/cal:CAALFM_C107890CA/cal:CAALFM_C703070CA/cal:CAALFM_C401820CA/cal:CAALFM_C406230CA/cal:CAALFM_C201430WA/cal:CAALFM_C206970WA/cal:CAALFM_C203010CA/cal:CAALFM_C601910WA/cal:CAALFM_C304520CA/cal:CAALFM_C603410CA/cal:CAALFM_C502890WA/cal:CAALFM_C109490CA	19	5	3640564/3646847/3641407/3635594/3642808	14	3644863/3647304/3641769/3642989/3639274/3640719/3635842/3643529/3643021/3644533/3635259/3639234/3637746/3634763
cal00280	Valine, leucine and isoleucine degradation	9/436	19/1949	0.0137076	0.214752	3647407/3637437/3639287/3643486/3637329/3636954/3641911/3646037/3641881	ALD6/UGA11/CAALFM_C100410CA/CAALFM_C207240CA/UGA1/CAALFM_C702010CA/CAALFM_CR08920WA/LPD1/ERG13	cal:CAALFM_C405130CA/cal:CAALFM_C203640WA/cal:CAALFM_C100410CA/cal:CAALFM_C207240CA/cal:CAALFM_C204190CA/cal:CAALFM_C702010CA/cal:CAALFM_CR08920WA/cal:CAALFM_CR07400CA/cal:CAALFM_CR09160CA	9	6	3647407/3637437/3639287/3643486/3636954/3641911	3	3637329/3646037/3641881
cal01110	Biosynthesis of secondary metabolites	88/436	327/1949	0.019679	0.264261	3638034/3646237/3640306/3636836/3644863/3640751/3638966/3647071/3639287/3641545/3645124/3645212/3636558/3634767/3645464/3648027/3647304/3645036/3635640/3643520/3641131/3641769/3635636/3644538/3635591/3644840/3642279/3640719/3634913/3647752/3643769/3635594/3644563/3638482/3640574/3636954/3640084/3641911/3636655/3642808/6335429/3645756/3642282/3647454/3645027/3645465/3646505/3646036/3641015/3642607…	LEU2/ARG4/SHM2/GOR1/ADE13/ADH2/INO1/COX15/CAALFM_C100410CA/IFG3/CAALFM_CR03110WA/LPT1/PXP2/RAM2/CAALFM_C204480WA/IFE2/ADE6/PRO3/ERG8/PST1/ARG8/ADE4/MDH1-1/SAM2/PDC12/CAALFM_CR06070WA/LYS9/ADE5%2C7/ZWF1/KGD1/CAALFM_C502040WA/CAALFM_C401820CA/GPD2/TPI1/CAALFM_C300640WA/CAALFM_C702010CA/MET6/CAALFM_CR08920WA/ERG6/CAALFM_C406230CA/LYS1/HIS5/GLG2/SRB1/CAR2/ADH3/GCV2/KGD2/HXK2/RIB1/CDC19/CAALFM_C603620…	cal:CAALFM_C700400WA/cal:CAALFM_C703570WA/cal:CAALFM_C603760CA/cal:CAALFM_C102980WA/cal:CAALFM_CR06150CA/cal:CAALFM_C108330CA/cal:CAALFM_CR10100CA/cal:CAALFM_C600720CA/cal:CAALFM_C100410CA/cal:CAALFM_C500450CA/cal:CAALFM_CR03110WA/cal:CAALFM_C207480WA/cal:CAALFM_C301930WA/cal:CAALFM_C109530WA/cal:CAALFM_C204480WA/cal:CAALFM_CR05340CA/cal:CAALFM_CR04740CA/cal:CAALFM_C400240CA/cal:CAALFM_C401870CA/…	88	42	3636836/3640751/3639287/3641545/3645212/3636558/3634767/3645464/3635640/3643520/3641131/3635636/3635591/3644840/3642279/3634913/3635594/3636954/3641911/3642808/6335429/3645756/3642282/3645465/3642994/3636499/3636584/3636885/3640767/3641897/3641813/3636501/3641104/3639495/3644778/3640440/3643909/3634830/3636399/3635761/3646224/3635779	46	3638034/3646237/3640306/3644863/3638966/3647071/3645124/3648027/3647304/3645036/3641769/3644538/3640719/3647752/3643769/3644563/3638482/3640574/3640084/3636655/3647454/3645027/3646505/3646036/3641015/3642607/3643438/3640297/3647390/3638029/3634893/3644055/3644533/3641233/3634930/3635259/3640435/3641400/3642238/3646037/3643176/3646982/3646509/3641881/3642979/3637746
cal00630	Glyoxylate and dicarboxylate metabolism	11/436	27/1949	0.0240097	0.282114	3640306/3647233/3636836/3635636/3636578/3646505/3646398/3641897/3646037/3643946/3639495	SHM2/CAALFM_C503770CA/GOR1/MDH1-1/CAALFM_C302060WA/GCV2/FDH1/CAALFM_CR09500CA/LPD1/CAALFM_C210070WA/CAT1	cal:CAALFM_C603760CA/cal:CAALFM_C503770CA/cal:CAALFM_C102980WA/cal:CAALFM_C401900CA/cal:CAALFM_C302060WA/cal:CAALFM_C108400CA/cal:CAALFM_CR05170CA/cal:CAALFM_CR09500CA/cal:CAALFM_CR07400CA/cal:CAALFM_C210070WA/cal:CAALFM_C106810WA	11	8	3647233/3636836/3635636/3636578/3646398/3641897/3643946/3639495	3	3640306/3646505/3646037
cal00562	Inositol phosphate metabolism	9/436	22/1949	0.0388681	0.325108	3647407/3638966/3635862/3639540/3643806/3638482/3647963/3639872/3635766	ALD6/INO1/FGR22/VPS34/INP51/TPI1/STT4/CAALFM_C105980WA/FAB1	cal:CAALFM_C405130CA/cal:CAALFM_CR10100CA/cal:CAALFM_C202600CA/cal:CAALFM_C106680WA/cal:CAALFM_C209770CA/cal:CAALFM_C307440WA/cal:CAALFM_CR07090WA/cal:CAALFM_C105980WA/cal:CAALFM_C201990CA	9	6	3647407/3635862/3639540/3643806/3647963/3635766	3	3638966/3638482/3639872
cal00330	Arginine and proline metabolism	11/436	29/1949	0.0413047	0.325108	3639287/3641545/3639224/3645036/3636954/3645027/3636439/3641391/3636885/3636982/3644116	CAALFM_C100410CA/IFG3/CAALFM_C602660CA/PRO3/CAALFM_C702010CA/CAR2/PUT2/CAALFM_C702920WA/DAO1/CAALFM_C701670WA/SPE2	cal:CAALFM_C100410CA/cal:CAALFM_C500450CA/cal:CAALFM_C602660CA/cal:CAALFM_C400240CA/cal:CAALFM_C702010CA/cal:CAALFM_C400160CA/cal:CAALFM_C504880CA/cal:CAALFM_C702920WA/cal:CAALFM_C103670CA/cal:CAALFM_C701670WA/cal:CAALFM_C500700CA	11	8	3639287/3641545/3639224/3636954/3641391/3636885/3636982/3644116	3	3645036/3645027/3636439
cal00380	Tryptophan metabolism	8/436	19/1949	0.0425786	0.325108	3639287/3639224/3636954/3646036/3641391/3636982/3646037/3639495	CAALFM_C100410CA/CAALFM_C602660CA/CAALFM_C702010CA/KGD2/CAALFM_C702920WA/CAALFM_C701670WA/LPD1/CAT1	cal:CAALFM_C100410CA/cal:CAALFM_C602660CA/cal:CAALFM_C702010CA/cal:CAALFM_CR07420WA/cal:CAALFM_C702920WA/cal:CAALFM_C701670WA/cal:CAALFM_CR07400CA/cal:CAALFM_C106810WA	8	6	3639287/3639224/3636954/3641391/3636982/3639495	2	3646036/3646037
cal00310	Lysine degradation	7/436	16/1949	0.046162	0.325108	3639287/3642279/3636954/6335429/3638306/3646036/3646037	CAALFM_C100410CA/LYS9/CAALFM_C702010CA/LYS1/CAALFM_C303470WA/KGD2/LPD1	cal:CAALFM_C100410CA/cal:CAALFM_C306590WA/cal:CAALFM_C702010CA/cal:CAALFM_C405320WA/cal:CAALFM_C303470WA/cal:CAALFM_CR07420WA/cal:CAALFM_CR07400CA	7	4	3639287/3642279/3636954/6335429	3	3638306/3646036/3646037
cal00340	Histidine metabolism	6/436	13/1949	0.0491706	0.325108	3639287/3636954/3645756/3641813/3636501/3646224	CAALFM_C100410CA/CAALFM_C702010CA/HIS5/CAALFM_C405640CA/HIS1/CAALFM_C703650WA	cal:CAALFM_C100410CA/cal:CAALFM_C702010CA/cal:CAALFM_C400650WA/cal:CAALFM_C405640CA/cal:CAALFM_C505320CA/cal:CAALFM_C703650WA	6	6	3639287/3636954/3645756/3641813/3636501/3646224	0
cal00740	Riboflavin metabolism	6/436	13/1949	0.0491706	0.325108	3646827/3642607/3636499/3634930/3643176/3644946	CAALFM_C112810WA/RIB1/RIB5/FAD1/CAALFM_CR03740CA/PHO113	cal:CAALFM_C112810WA/cal:CAALFM_CR02990CA/cal:CAALFM_C505300WA/cal:CAALFM_C108650CA/cal:CAALFM_CR03740CA/cal:CAALFM_CR02180WA	6	2	3636499/3644946	4	3646827/3642607/3634930/3643176
cal00240	Pyrimidine metabolism	11/436	30/1949	0.0525643	0.325108	3636649/3643315/3642989/3635715/3645728/3642808/3643021/30515286/3647988/3635616/3637746	URA3/CAALFM_C114310WA/RNR1/CPA1/URA2/CAALFM_C406230CA/RNR21/CAALFM_C406860CA/URA6/CAALFM_C401510WA/YNK1	cal:CAALFM_C301350CA/cal:CAALFM_C114310WA/cal:CAALFM_C203160CA/cal:CAALFM_C401550CA/cal:CAALFM_CR07050CA/cal:CAALFM_C406230CA/cal:CAALFM_C203010CA/cal:CAALFM_C406860CA/cal:CAALFM_C104420CA/cal:CAALFM_C401510WA/cal:CAALFM_C502890WA	11	6	3636649/3643315/3635715/3642808/30515286/3635616	5	3642989/3645728/3643021/3647988/3637746
cal00410	beta-Alanine metabolism	8/436	20/1949	0.0575577	0.325108	3647407/3637437/3639287/3636558/3637329/3640574/3636954/3642994	ALD6/UGA11/CAALFM_C100410CA/PXP2/UGA1/CAALFM_C300640WA/CAALFM_C702010CA/AMO1	cal:CAALFM_C405130CA/cal:CAALFM_C203640WA/cal:CAALFM_C100410CA/cal:CAALFM_C301930WA/cal:CAALFM_C204190CA/cal:CAALFM_C300640WA/cal:CAALFM_C702010CA/cal:CAALFM_C203120WA	8	6	3647407/3637437/3639287/3636558/3636954/3642994	2	3637329/3640574
cal00250	Alanine, aspartate and glutamate metabolism	10/436	27/1949	0.0592951	0.325108	3646237/3637437/3644863/3641769/3637329/3640574/3635715/3645728/3638306/3636439	ARG4/UGA11/ADE13/ADE4/UGA1/CAALFM_C300640WA/CPA1/URA2/CAALFM_C303470WA/PUT2	cal:CAALFM_C703570WA/cal:CAALFM_C203640WA/cal:CAALFM_CR06150CA/cal:CAALFM_C107710CA/cal:CAALFM_C204190CA/cal:CAALFM_C300640WA/cal:CAALFM_C401550CA/cal:CAALFM_CR07050CA/cal:CAALFM_C303470WA/cal:CAALFM_C504880CA	10	2	3637437/3635715	8	3646237/3644863/3641769/3637329/3640574/3645728/3638306/3636439
cal01232	Nucleotide metabolism	13/436	38/1949	0.0626378	0.325108	3644863/3643315/3642989/3639274/3642808/3635842/3643529/3643021/3644533/30515286/3647988/3637746/3634763	ADE13/CAALFM_C114310WA/RNR1/ADO1/CAALFM_C406230CA/APT1/AAH1/RNR21/ADK1/CAALFM_C406860CA/URA6/YNK1/GUA1	cal:CAALFM_CR06150CA/cal:CAALFM_C114310WA/cal:CAALFM_C203160CA/cal:CAALFM_C603080CA/cal:CAALFM_C406230CA/cal:CAALFM_C201430WA/cal:CAALFM_C206970WA/cal:CAALFM_C203010CA/cal:CAALFM_C601910WA/cal:CAALFM_C406860CA/cal:CAALFM_C104420CA/cal:CAALFM_C502890WA/cal:CAALFM_C109490CA	13	3	3643315/3642808/30515286	10	3644863/3642989/3639274/3635842/3643529/3643021/3644533/3647988/3637746/3634763
cal04213	Longevity regulating pathway - multiple species	11/436	31/1949	0.0657133	0.325108	30515248/3640264/3636229/3641407/3643482/3646232/3644711/3642095/3639495/3636507/3642097	SOD1/SNF4/HSP70/CYR1/TPK2/PNC1/SSA2/SSB1/CAT1/CAALFM_C504530WA/HSP104	cal:CAALFM_C402320CA/cal:CAALFM_C603920WA/cal:CAALFM_C113480WA/cal:CAALFM_C703070CA/cal:CAALFM_C207210CA/cal:CAALFM_C703520WA/cal:CAALFM_C104300CA/cal:CAALFM_CR08090WA/cal:CAALFM_C106810WA/cal:CAALFM_C504530WA/cal:CAALFM_CR08250CA	11	8	30515248/3636229/3641407/3643482/3646232/3644711/3639495/3642097	3	3640264/3642095/3636507
cal00360	Phenylalanine metabolism	6/436	14/1949	0.0703109	0.330461	3647320/3639224/3645756/3641391/3642994/3636982	ARO10/CAALFM_C602660CA/HIS5/CAALFM_C702920WA/AMO1/CAALFM_C701670WA	cal:CAALFM_CR06860CA/cal:CAALFM_C602660CA/cal:CAALFM_C400650WA/cal:CAALFM_C702920WA/cal:CAALFM_C203120WA/cal:CAALFM_C701670WA	6	6	3647320/3639224/3645756/3641391/3642994/3636982	0
cal00620	Pyruvate metabolism	15/436	49/1949	0.11184	0.500617	3640751/3639287/3640163/3645464/3636213/3637323/3635636/3648026/3644067/3636954/3639380/3645465/3643438/3643025/3646037	ADH2/CAALFM_C100410CA/CAALFM_CR01810CA/CAALFM_C204480WA/CYB2/PYC2/MDH1-1/GRE2/GLO2/CAALFM_C702010CA/CAALFM_C100630WA/ADH3/CDC19/DLD1/LPD1	cal:CAALFM_C108330CA/cal:CAALFM_C100410CA/cal:CAALFM_CR01810CA/cal:CAALFM_C204480WA/cal:CAALFM_C113630WA/cal:CAALFM_C403940CA/cal:CAALFM_C401900CA/cal:CAALFM_C206720WA/cal:CAALFM_C209260CA/cal:CAALFM_C702010CA/cal:CAALFM_C100630WA/cal:CAALFM_C204470WA/cal:CAALFM_C205460WA/cal:CAALFM_C202980CA/cal:CAALFM_CR07400CA	15	12	3640751/3639287/3640163/3645464/3636213/3637323/3635636/3644067/3636954/3639380/3645465/3643025	3	3648026/3643438/3646037
cal00900	Terpenoid backbone biosynthesis	7/436	20/1949	0.138187	0.576536	3634767/3635640/3644055/3641104/3646982/3641881/3636399	RAM2/ERG8/CAALFM_C601130WA/RCE1/BTS1/ERG13/RER2	cal:CAALFM_C109530WA/cal:CAALFM_C401870CA/cal:CAALFM_C601130WA/cal:CAALFM_C404570WA/cal:CAALFM_C503620WA/cal:CAALFM_CR09160CA/cal:CAALFM_C505330CA	7	4	3634767/3635640/3641104/3636399	3	3644055/3646982/3641881
cal00480	Glutathione metabolism	9/436	28/1949	0.153279	0.576536	3638301/3645278/3642989/3634913/3643653/3637937/3645375/3639366/3643021	GTT13/GST3/RNR1/ZWF1/GTT1/GST2/ECM38/CIS2/RNR21	cal:CAALFM_C303580CA/cal:CAALFM_CR06460WA/cal:CAALFM_C203160CA/cal:CAALFM_C108980CA/cal:CAALFM_C305630WA/cal:CAALFM_C402990CA/cal:CAALFM_C403540CA/cal:CAALFM_C100550WA/cal:CAALFM_C203010CA	9	6	3638301/3645278/3634913/3643653/3637937/3645375	3	3642989/3639366/3643021
cal00500	Starch and sucrose metabolism	10/436	32/1949	0.157795	0.576536	3636421/3642282/3641015/3640410/3636837/3636584/3640435/3635691/3639844/3636816	CAALFM_C504940WA/GLG2/HXK2/GSL2/XOG1/CAALFM_C301820WA/GSY1/BGL2/GSL1/EXG2	cal:CAALFM_C504940WA/cal:CAALFM_C306450WA/cal:CAALFM_CR04510WA/cal:CAALFM_CR00850CA/cal:CAALFM_C102990CA/cal:CAALFM_C301820WA/cal:CAALFM_CR00780CA/cal:CAALFM_C402250CA/cal:CAALFM_C105600WA/cal:CAALFM_C102630CA	10	7	3636421/3642282/3640410/3636837/3636584/3635691/3639844	3	3641015/3640435/3636816
cal00860	Porphyrin metabolism	6/436	17/1949	0.159467	0.576536	3647071/3645124/3643769/3647390/3638029/3641233	COX15/CAALFM_CR03110WA/CAALFM_C502040WA/HEM13/GUS1/CAALFM_C210860CA	cal:CAALFM_C600720CA/cal:CAALFM_CR03110WA/cal:CAALFM_C502040WA/cal:CAALFM_C304060CA/cal:CAALFM_C700620WA/cal:CAALFM_C210860CA	6	0		6	3647071/3645124/3643769/3647390/3638029/3641233
cal02010	ABC transporters	6/436	17/1949	0.159467	0.576536	3639256/3642288/3647389/3643964/3640290/3646284	MDL2/HST6/CDR11/YOR1/SNQ2/ATM1	cal:CAALFM_C603140CA/cal:CAALFM_C306510CA/cal:CAALFM_C304070CA/cal:CAALFM_C209990CA/cal:CAALFM_C603840CA/cal:CAALFM_C604210CA	6	1	3642288	5	3639256/3647389/3643964/3640290/3646284
cal04070	Phosphatidylinositol signaling system	7/436	21/1949	0.169536	0.590237	3646520/3639540/3643806/3647963/3639872/3641594/3635766	CMD1/VPS34/INP51/STT4/CAALFM_C105980WA/AFL1/FAB1	cal:CAALFM_C406030WA/cal:CAALFM_C106680WA/cal:CAALFM_C209770CA/cal:CAALFM_CR07090WA/cal:CAALFM_C105980WA/cal:CAALFM_C500180WA/cal:CAALFM_C201990CA	7	5	3646520/3639540/3643806/3647963/3635766	2	3639872/3641594
cal00071	Fatty acid degradation	8/436	25/1949	0.176291	0.591834	3640751/3639287/3636558/3645464/3636954/3641911/3645465/3642126	ADH2/CAALFM_C100410CA/PXP2/CAALFM_C204480WA/CAALFM_C702010CA/CAALFM_CR08920WA/ADH3/CAALFM_CR08670CA	cal:CAALFM_C108330CA/cal:CAALFM_C100410CA/cal:CAALFM_C301930WA/cal:CAALFM_C204480WA/cal:CAALFM_C702010CA/cal:CAALFM_CR08920WA/cal:CAALFM_C204470WA/cal:CAALFM_CR08670CA	8	8	3640751/3639287/3636558/3645464/3636954/3641911/3645465/3642126	0
cal04141	Protein processing in endoplasmic reticulum	22/436	82/1949	0.19463	0.630871	3638384/3641566/3646071/3641367/3640390/3636229/3641554/3640083/3644711/3639032/3647192/3636860/3643158/3643928/3635834/3645897/3642095/3639820/3641639/3634871/3638927/3641623	KRE5/ROT2/CAALFM_C600310WA/PDI1/CAALFM_CR00690CA/HSP70/CAALFM_C500350CA/SHP1/SSA2/CAALFM_CR10020CA/SNL1/SEC62/HLJ1/CAALFM_C210200WA/RAD23/GCN2/SSB1/NPL4/SEC12/DOA1/UBC4/CAALFM_C601460CA	cal:CAALFM_C302960CA/cal:CAALFM_C500220WA/cal:CAALFM_C600310WA/cal:CAALFM_C703250CA/cal:CAALFM_CR00690CA/cal:CAALFM_C113480WA/cal:CAALFM_C500350CA/cal:CAALFM_CR01610CA/cal:CAALFM_C104300CA/cal:CAALFM_CR10020CA/cal:CAALFM_C110530WA/cal:CAALFM_C103340CA/cal:CAALFM_C704050WA/cal:CAALFM_C210200WA/cal:CAALFM_C201850WA/cal:CAALFM_C701330CA/cal:CAALFM_CR08090WA/cal:CAALFM_C106110CA/cal:CAALFM_C601760WA/…	22	8	3641566/3640390/3636229/3644711/3639032/3647192/3643928/3645897	14	3638384/3646071/3641367/3641554/3640083/3636860/3643158/3635834/3642095/3639820/3641639/3634871/3638927/3641623
cal00640	Propanoate metabolism	7/436	22/1949	0.203659	0.638132	3647407/3637437/3640163/3636558/3637329/3648026/3646037	ALD6/UGA11/CAALFM_CR01810CA/PXP2/UGA1/GRE2/LPD1	cal:CAALFM_C405130CA/cal:CAALFM_C203640WA/cal:CAALFM_CR01810CA/cal:CAALFM_C301930WA/cal:CAALFM_C204190CA/cal:CAALFM_C206720WA/cal:CAALFM_CR07400CA	7	4	3647407/3637437/3640163/3636558	3	3637329/3648026/3646037
cal00350	Tyrosine metabolism	6/436	19/1949	0.23663	0.708557	3640751/3645464/3645756/3638306/3645465/3642994	ADH2/CAALFM_C204480WA/HIS5/CAALFM_C303470WA/ADH3/AMO1	cal:CAALFM_C108330CA/cal:CAALFM_C204480WA/cal:CAALFM_C400650WA/cal:CAALFM_C303470WA/cal:CAALFM_C204470WA/cal:CAALFM_C203120WA	6	5	3640751/3645464/3645756/3645465/3642994	1	3638306
cal04144	Endocytosis	19/436	72/1949	0.241211	0.708557	3642003/3640407/3636511/3640587/3636229/3644711/3647250/3635665/3647093/3646043/3635220/3639326/3641915/3644866/3645794/3642095/3643337/3637703/3641631	CAALFM_C111920WA/HSE1/CAALFM_C504580CA/IST1/HSP70/SSA2/VPS22/CAALFM_C401950WA/WAL1/ARC15/SEC7/VPS27/ARP2/ARC40/VPS28/SSB1/DOA4/VPS4/CTA1	cal:CAALFM_C111920WA/cal:CAALFM_CR01210CA/cal:CAALFM_C504580CA/cal:CAALFM_C300540CA/cal:CAALFM_C113480WA/cal:CAALFM_C104300CA/cal:CAALFM_C501620CA/cal:CAALFM_C401950WA/cal:CAALFM_CR09650WA/cal:CAALFM_CR07210WA/cal:CAALFM_C304820CA/cal:CAALFM_C100750CA/cal:CAALFM_CR08950WA/cal:CAALFM_CR06180WA/cal:CAALFM_C208940CA/cal:CAALFM_CR08090WA/cal:CAALFM_C114000CA/cal:CAALFM_C503090WA/cal:CAALFM_C601830WA	19	10	3642003/3636511/3640587/3636229/3644711/3647250/3635665/3646043/3635220/3644866	9	3640407/3647093/3639326/3641915/3645794/3642095/3643337/3637703/3641631
cal00730	Thiamine metabolism	4/436	1949-12-01	0.27137	0.765662	3641921/3644533/3638333/3644946	THI13/ADK1/THI6/PHO113	cal:CAALFM_CR09290WA/cal:CAALFM_C601910WA/cal:CAALFM_C302860WA/cal:CAALFM_CR02180WA	4	3	3641921/3638333/3644946	1	3644533
cal00561	Glycerolipid metabolism	8/436	28/1949	0.276942	0.765662	3639287/3636996/3645212/3636954/3639356/3641897/3635779/3634863	CAALFM_C100410CA/CAALFM_C702140WA/LPT1/CAALFM_C702010CA/LRO1/CAALFM_CR09500CA/SMP2/CAALFM_C109980CA	cal:CAALFM_C100410CA/cal:CAALFM_C702140WA/cal:CAALFM_C207480WA/cal:CAALFM_C702010CA/cal:CAALFM_C100870WA/cal:CAALFM_CR09500CA/cal:CAALFM_C201550WA/cal:CAALFM_C109980CA	8	8	3639287/3636996/3645212/3636954/3639356/3641897/3635779/3634863	0
cal01200	Carbon metabolism	24/436	96/1949	0.300253	0.806081	3647407/3640306/3647233/3636558/3637323/3635636/3634913/3647752/3635594/3638482/3636578/3646505/3646036/3641015/3643438/3646398/3634893/3640767/3642238/3641897/3646037/3643946/3639495/3642979	ALD6/SHM2/CAALFM_C503770CA/PXP2/PYC2/MDH1-1/ZWF1/KGD1/CAALFM_C401820CA/TPI1/CAALFM_C302060WA/GCV2/KGD2/HXK2/CDC19/FDH1/IDH1/TKL1/CAALFM_C306280WA/CAALFM_CR09500CA/LPD1/CAALFM_C210070WA/CAT1/IDH2	cal:CAALFM_C405130CA/cal:CAALFM_C603760CA/cal:CAALFM_C503770CA/cal:CAALFM_C301930WA/cal:CAALFM_C403940CA/cal:CAALFM_C401900CA/cal:CAALFM_C108980CA/cal:CAALFM_C300880WA/cal:CAALFM_C401820CA/cal:CAALFM_C307440WA/cal:CAALFM_C302060WA/cal:CAALFM_C108400CA/cal:CAALFM_CR07420WA/cal:CAALFM_CR04510WA/cal:CAALFM_C205460WA/cal:CAALFM_CR05170CA/cal:CAALFM_C109630WA/cal:CAALFM_C108320WA/cal:CAALFM_C306280WA/…	24	13	3647407/3647233/3636558/3637323/3635636/3634913/3635594/3636578/3646398/3640767/3641897/3643946/3639495	11	3640306/3647752/3638482/3646505/3646036/3641015/3643438/3634893/3642238/3646037/3642979
cal00260	Glycine, serine and threonine metabolism	9/436	33/1949	0.308712	0.806081	3640306/3641545/3646505/3642994/3636885/3642238/3641897/3646037/3635616	SHM2/IFG3/GCV2/AMO1/DAO1/CAALFM_C306280WA/CAALFM_CR09500CA/LPD1/CAALFM_C401510WA	cal:CAALFM_C603760CA/cal:CAALFM_C500450CA/cal:CAALFM_C108400CA/cal:CAALFM_C203120WA/cal:CAALFM_C103670CA/cal:CAALFM_C306280WA/cal:CAALFM_CR09500CA/cal:CAALFM_CR07400CA/cal:CAALFM_C401510WA	9	5	3641545/3642994/3636885/3641897/3635616	4	3640306/3646505/3642238/3646037
cal00051	Fructose and mannose metabolism	6/436	21/1949	0.322534	0.81941	3642823/3644416/3638482/3647454/3641015/3644572	SOU2/CAALFM_C111080WA/TPI1/SRB1/HXK2/CAALFM_C102320CA	cal:CAALFM_C406380WA/cal:CAALFM_C111080WA/cal:CAALFM_C307440WA/cal:CAALFM_C307950CA/cal:CAALFM_CR04510WA/cal:CAALFM_C102320CA	6	1	3642823	5	3644416/3638482/3647454/3641015/3644572
cal00020	Citrate cycle (TCA cycle)	7/436	27/1949	0.399904	0.96803	3637323/3635636/3647752/3646036/3634893/3646037/3642979	PYC2/MDH1-1/KGD1/KGD2/IDH1/LPD1/IDH2	cal:CAALFM_C403940CA/cal:CAALFM_C401900CA/cal:CAALFM_C300880WA/cal:CAALFM_CR07420WA/cal:CAALFM_C109630WA/cal:CAALFM_CR07400CA/cal:CAALFM_C203080WA	7	2	3637323/3635636	5	3647752/3646036/3634893/3646037/3642979
cal00010	Glycolysis / Gluconeogenesis	10/436	40/1949	0.403702	0.96803	3640751/3639287/3645464/3635591/3638482/3636954/3645465/3641015/3643438/3646037	ADH2/CAALFM_C100410CA/CAALFM_C204480WA/PDC12/TPI1/CAALFM_C702010CA/ADH3/HXK2/CDC19/LPD1	cal:CAALFM_C108330CA/cal:CAALFM_C100410CA/cal:CAALFM_C204480WA/cal:CAALFM_C401850CA/cal:CAALFM_C307440WA/cal:CAALFM_C702010CA/cal:CAALFM_C204470WA/cal:CAALFM_CR04510WA/cal:CAALFM_C205460WA/cal:CAALFM_CR07400CA	10	6	3640751/3639287/3645464/3635591/3636954/3645465	4	3638482/3641015/3643438/3646037
cal00563	Glycosylphosphatidylinositol (GPI)-anchor biosynthesis	6/436	23/1949	0.411928	0.96803	3646669/3645575/3635641/3641019/3636488/3637921	GPI8/GWT1/CAALFM_C402100CA/SPT14/CAALFM_C505040WA/CAALFM_C403130WA	cal:CAALFM_C107460CA/cal:CAALFM_C205730CA/cal:CAALFM_C402100CA/cal:CAALFM_CR04040CA/cal:CAALFM_C505040WA/cal:CAALFM_C403130WA	6	5	3645575/3635641/3641019/3636488/3637921	1	3646669
cal04146	Peroxisome	12/436	52/1949	0.505944	0.999714	30515248/3645739/3641545/3636558/3646565/3644566/3644027/3642126/3636885/3638504/3639495/3636507	SOD1/SPS20/IFG3/PXP2/CAALFM_C206440CA/CAALFM_C102270CA/PEX7/CAALFM_CR08670CA/DAO1/CAALFM_C306730WA/CAT1/CAALFM_C504530WA	cal:CAALFM_C402320CA/cal:CAALFM_C400830WA/cal:CAALFM_C500450CA/cal:CAALFM_C301930WA/cal:CAALFM_C206440CA/cal:CAALFM_C102270CA/cal:CAALFM_C600880WA/cal:CAALFM_CR08670CA/cal:CAALFM_C103670CA/cal:CAALFM_C306730WA/cal:CAALFM_C106810WA/cal:CAALFM_C504530WA	12	9	30515248/3645739/3641545/3636558/3644566/3642126/3636885/3638504/3639495	3	3646565/3644027/3636507
cal00514	Other types of O-glycan biosynthesis	3/436	13/1949	0.583273	0.999714	3641116/3644405/3634904	PMT6/MNN2/MNN12	cal:CAALFM_C404780WA/cal:CAALFM_C110720CA/cal:CAALFM_C110300WA	3	2	3641116/3634904	1	3644405
cal00100	Steroid biosynthesis	4/436	18/1949	0.598068	0.999714	3636655/3641400/3646509/3635761	ERG6/ERG5/ERG1/ERG7	cal:CAALFM_C302150CA/cal:CAALFM_C702840CA/cal:CAALFM_C108590CA/cal:CAALFM_C202460WA	4	1	3635761	3	3636655/3641400/3646509
cal04139	Mitophagy - yeast	8/436	37/1949	0.608696	0.999714	3646280/3637393/3645744/3645915/3647903/3643673/3640187/3637918	CAALFM_C604290WA/HOG1/CAALFM_C400560CA/CAALFM_C701180WA/CAALFM_C600170CA/DNM1/MRS7/UME7	cal:CAALFM_C604290WA/cal:CAALFM_C203330CA/cal:CAALFM_C400560CA/cal:CAALFM_C701180WA/cal:CAALFM_C600170CA/cal:CAALFM_C305520CA/cal:CAALFM_C101320WA/cal:CAALFM_C402560CA	8	3	3645744/3645915/3637918	5	3646280/3637393/3647903/3643673/3640187
cal00513	Various types of N-glycan biosynthesis	7/436	33/1949	0.632056	0.999714	3634904/3639346/3638789/3646981/3643928/3645871/3638527	MNN12/CAALFM_C100810WA/MNN24/HEX1/CAALFM_C210200WA/ALG11/VAN1	cal:CAALFM_C110300WA/cal:CAALFM_C100810WA/cal:CAALFM_C201300CA/cal:CAALFM_C503610WA/cal:CAALFM_C210200WA/cal:CAALFM_C602270CA/cal:CAALFM_C307500WA	7	5	3634904/3639346/3638789/3646981/3643928	2	3645871/3638527
cal00670	One carbon pool by folate	3/436	14/1949	0.637339	0.999714	3640306/3641137/3645732	SHM2/CAALFM_C404720WA/MIS11	cal:CAALFM_C603760CA/cal:CAALFM_C404720WA/cal:CAALFM_CR07010WA	3	0		3	3640306/3641137/3645732
cal03250	Viral life cycle - HIV-1	3/436	14/1949	0.637339	0.999714	3639326/3646925/3637703	VPS27/GSP1/VPS4	cal:CAALFM_C100750CA/cal:CAALFM_C206310CA/cal:CAALFM_C503090WA	3	0		3	3639326/3646925/3637703
cal03008	Ribosome biogenesis in eukaryotes	15/436	72/1949	0.671072	0.999714	3646084/3640299/3645332/3638925/3645866/3646614/3635760/3635757/3646925/3643345/3647682/3637735/3647991/3640416/3639857	NOP5/NOG2/GAR1/SIK1/CAALFM_C602230WA/NMD3/UTP22/UTP21/GSP1/CAALFM_C114080WA/CAALFM_C110620WA/RIX7/NOP4/PWP2/BMS1	cal:CAALFM_C600370CA/cal:CAALFM_C603640WA/cal:CAALFM_C111550WA/cal:CAALFM_CR09950CA/cal:CAALFM_C602230WA/cal:CAALFM_CR06720WA/cal:CAALFM_C202450CA/cal:CAALFM_C202430WA/cal:CAALFM_C206310CA/cal:CAALFM_C114080WA/cal:CAALFM_C110620WA/cal:CAALFM_C502120CA/cal:CAALFM_C104390CA/cal:CAALFM_CR00800CA/cal:CAALFM_C301000WA	15	0		15	3646084/3640299/3645332/3638925/3645866/3646614/3635760/3635757/3646925/3643345/3647682/3637735/3647991/3640416/3639857
cal00680	Methane metabolism	4/436	20/1949	0.686473	0.999714	3640306/3647233/3646398/3643946	SHM2/CAALFM_C503770CA/FDH1/CAALFM_C210070WA	cal:CAALFM_C603760CA/cal:CAALFM_C503770CA/cal:CAALFM_CR05170CA/cal:CAALFM_C210070WA	4	3	3647233/3646398/3643946	1	3640306
cal00510	N-Glycan biosynthesis	6/436	30/1949	0.69291	0.999714	3641566/3644598/3639346/3643928/3645786/3645871	ROT2/CWH8/CAALFM_C100810WA/CAALFM_C210200WA/DFG10/ALG11	cal:CAALFM_C500220WA/cal:CAALFM_C102250WA/cal:CAALFM_C100810WA/cal:CAALFM_C210200WA/cal:CAALFM_C208970CA/cal:CAALFM_C602270CA	6	5	3641566/3644598/3639346/3643928/3645786	1	3645871
cal01230	Biosynthesis of amino acids	22/436	107/1949	0.714965	0.999714	3638034/3646237/3640306/3645036/3637323/3641131/3644538/3642279/3635594/3638482/3640084/6335429/3645756/3643438/3634893/3640767/3642238/3641813/3636501/3634830/3642979/3646224	LEU2/ARG4/SHM2/PRO3/PYC2/ARG8/SAM2/LYS9/CAALFM_C401820CA/TPI1/MET6/LYS1/HIS5/CDC19/IDH1/TKL1/CAALFM_C306280WA/CAALFM_C405640CA/HIS1/ARG5%2C6/IDH2/CAALFM_C703650WA	cal:CAALFM_C700400WA/cal:CAALFM_C703570WA/cal:CAALFM_C603760CA/cal:CAALFM_C400240CA/cal:CAALFM_C403940CA/cal:CAALFM_C405070CA/cal:CAALFM_C111450CA/cal:CAALFM_C306590WA/cal:CAALFM_C401820CA/cal:CAALFM_C307440WA/cal:CAALFM_CR01620CA/cal:CAALFM_C405320WA/cal:CAALFM_C400650WA/cal:CAALFM_C205460WA/cal:CAALFM_C109630WA/cal:CAALFM_C108320WA/cal:CAALFM_C306280WA/cal:CAALFM_C405640CA/cal:CAALFM_C505320CA/…	22	11	3637323/3641131/3642279/3635594/6335429/3645756/3640767/3641813/3636501/3634830/3646224	11	3638034/3646237/3640306/3645036/3644538/3638482/3640084/3643438/3634893/3642238/3642979
cal00760	Nicotinate and nicotinamide metabolism	4/436	21/1949	0.725185	0.999714	3646232/3638306/3636144/3636827	PNC1/CAALFM_C303470WA/CAALFM_C113270WA/CAALFM_C102740CA	cal:CAALFM_C703520WA/cal:CAALFM_C303470WA/cal:CAALFM_C113270WA/cal:CAALFM_C102740CA	4	3	3646232/3636144/3636827	1	3638306
cal00220	Arginine biosynthesis	3/436	16/1949	0.730147	0.999714	3646237/3641131/3634830	ARG4/ARG8/ARG5%2C6	cal:CAALFM_C703570WA/cal:CAALFM_C405070CA/cal:CAALFM_C109290CA	3	2	3641131/3634830	1	3646237
cal01040	Biosynthesis of unsaturated fatty acids	3/436	16/1949	0.730147	0.999714	3644053/3636558/3644840	FAD2/PXP2/CAALFM_CR06070WA	cal:CAALFM_C601110WA/cal:CAALFM_C301930WA/cal:CAALFM_CR06070WA	3	2	3636558/3644840	1	3644053
cal00790	Folate biosynthesis	2/436	1949-11-01	0.743514	0.999714	3648307/3642607	ABZ1/RIB1	cal:CAALFM_C405290WA/cal:CAALFM_CR02990CA	2	1	3648307	1	3642607
cal04011	MAPK signaling pathway - yeast	17/436	85/1949	0.744229	0.999714	3640163/3637393/3637434/3648026/3644563/3640953/3647963/3640410/3642789/3641144/3643737/3648188/3635661/3639844/3639495/3646075/3635627	CAALFM_CR01810CA/HOG1/ROM2/GRE2/GPD2/HST7/STT4/GSL2/CEK1/SSK2/CDC24/MIH1/RGA2/GSL1/CAT1/PKH3/BEM1	cal:CAALFM_CR01810CA/cal:CAALFM_C203330CA/cal:CAALFM_C203240CA/cal:CAALFM_C206720WA/cal:CAALFM_C602010CA/cal:CAALFM_CR03900WA/cal:CAALFM_CR07090WA/cal:CAALFM_CR00850CA/cal:CAALFM_C406480CA/cal:CAALFM_C405030CA/cal:CAALFM_C501970CA/cal:CAALFM_C300800WA/cal:CAALFM_C402000CA/cal:CAALFM_C105600WA/cal:CAALFM_C106810WA/cal:CAALFM_C600350WA/cal:CAALFM_C401410WA	17	9	3640163/3647963/3640410/3642789/3641144/3635661/3639844/3639495/3635627	8	3637393/3637434/3648026/3644563/3640953/3643737/3648188/3646075
cal04138	Autophagy - yeast	16/436	81/1949	0.758596	0.999714	3641127/3646524/3636208/3639540/3643482/3634800/3646043/3643670/3645897/3641915/3644866/3642643/3644040/3637830/3645316/3637918	CAALFM_C404460CA/VPS11/SEC18/VPS34/TPK2/VPS41/ARC15/CAALFM_C305460WA/GCN2/ARP2/ARC40/SNF1/VPS15/CAALFM_C402670WA/AVT4/UME7	cal:CAALFM_C404460CA/cal:CAALFM_C405910CA/cal:CAALFM_C113580WA/cal:CAALFM_C106680WA/cal:CAALFM_C207210CA/cal:CAALFM_C109920WA/cal:CAALFM_CR07210WA/cal:CAALFM_C305460WA/cal:CAALFM_C701330CA/cal:CAALFM_CR08950WA/cal:CAALFM_CR06180WA/cal:CAALFM_C501320WA/cal:CAALFM_C601190CA/cal:CAALFM_C402670WA/cal:CAALFM_C111750WA/cal:CAALFM_C402560CA	16	11	3641127/3646524/3639540/3643482/3634800/3646043/3645897/3644866/3644040/3637830/3637918	5	3636208/3643670/3641915/3642643/3645316
cal04814	Motor proteins	4/436	22/1949	0.76023	0.999714	3638918/3641774/3635665/3640970	CAALFM_CR10190CA/TUB4/CAALFM_C401950WA/NIP100	cal:CAALFM_CR10190CA/cal:CAALFM_C405570CA/cal:CAALFM_C401950WA/cal:CAALFM_CR04030WA	4	4	3638918/3641774/3635665/3640970	0
cal03040	Spliceosome	15/436	77/1949	0.773389	0.999714	3636404/3634796/3636229/3635700/30515056/3644711/3635187/3637842/3647692/3641807/3642095/30515326/3642796/30515108/3638903	PRP22/BUD31/HSP70/CAALFM_C401280CA/CAALFM_C111680CA/SSA2/CAALFM_C304230WA/CAALFM_C403150WA/DBP2/LEA1/SSB1/CAALFM_C600530CA/CAALFM_C406410WA/CAALFM_C203880CA/CAALFM_C200200WA	cal:CAALFM_C505370CA/cal:CAALFM_C109880CA/cal:CAALFM_C113480WA/cal:CAALFM_C401280CA/cal:CAALFM_C111680CA/cal:CAALFM_C104300CA/cal:CAALFM_C304230WA/cal:CAALFM_C403150WA/cal:CAALFM_CR02530WA/cal:CAALFM_C405750CA/cal:CAALFM_CR08090WA/cal:CAALFM_C600530CA/cal:CAALFM_C406410WA/cal:CAALFM_C203880CA/cal:CAALFM_C200200WA	15	11	3636404/3636229/3635700/30515056/3644711/3635187/3637842/3641807/3642796/30515108/3638903	4	3634796/3647692/3642095/30515326
cal01212	Fatty acid metabolism	6/436	33/1949	0.781719	0.999714	3644053/3636558/3644840/3641911/3640440/3645321	FAD2/PXP2/CAALFM_CR06070WA/CAALFM_CR08920WA/CAALFM_CR00710CA/MRF1	cal:CAALFM_C601110WA/cal:CAALFM_C301930WA/cal:CAALFM_CR06070WA/cal:CAALFM_CR08920WA/cal:CAALFM_CR00710CA/cal:CAALFM_C111700CA	6	5	3636558/3644840/3641911/3640440/3645321	1	3644053
cal00130	Ubiquinone and other terpenoid-quinone biosynthesis	2/436	1949-12-01	0.787347	0.999714	3643520/3643909	PST1/PST2	cal:CAALFM_C206870CA/cal:CAALFM_C208640CA	2	2	3643520/3643909	0
cal00300	Lysine biosynthesis	2/436	1949-12-01	0.787347	0.999714	3642279/6335429	LYS9/LYS1	cal:CAALFM_C306590WA/cal:CAALFM_C405320WA	2	2	3642279/6335429	0
cal04113	Meiosis - yeast	17/436	89/1949	0.811456	0.999714	3647733/3646155/3637922/3645737/3646929/3639383/3638876/3641407/3644767/3643482/3644453/3640289/3643424/3642643/3640206/3637918/3645205	MEC1/CAALFM_C405220CA/BUB1/CAALFM_CR06960WA/EFH1/APC1/HGT7/CYR1/CAALFM_C104690CA/TPK2/RME1/SAL6/CDC7/SNF1/CAALFM_C101180CA/UME7/CAALFM_C207530CA	cal:CAALFM_C504060CA/cal:CAALFM_C405220CA/cal:CAALFM_C403120CA/cal:CAALFM_CR06960WA/cal:CAALFM_C206340WA/cal:CAALFM_C100600WA/cal:CAALFM_C201000WA/cal:CAALFM_C703070CA/cal:CAALFM_C104690CA/cal:CAALFM_C207210CA/cal:CAALFM_C107330WA/cal:CAALFM_C603830WA/cal:CAALFM_C205320WA/cal:CAALFM_C501320WA/cal:CAALFM_C101180CA/cal:CAALFM_C402560CA/cal:CAALFM_C207530CA	17	12	3647733/3646155/3637922/3645737/3646929/3639383/3641407/3644767/3643482/3640206/3637918/3645205	5	3638876/3644453/3640289/3643424/3642643
cal00290	Valine, leucine and isoleucine biosynthesis	2/436	13/1949	0.824452	0.999714	3638034/3642238	LEU2/CAALFM_C306280WA	cal:CAALFM_C700400WA/cal:CAALFM_C306280WA	2	0		2	3638034/3642238
cal04145	Phagosome	6/436	35/1949	0.829205	0.999714	3639540/3642798/3639326/3635766/3640111/30515402	VPS34/VMA8/VPS27/FAB1/VMA4/VMA13	cal:CAALFM_C106680WA/cal:CAALFM_C406400CA/cal:CAALFM_C100750CA/cal:CAALFM_C201990CA/cal:CAALFM_CR01970CA/cal:CAALFM_CR05080WA	6	5	3639540/3642798/3635766/3640111/30515402	1	3639326
cal03060	Protein export	3/436	19/1949	0.833066	0.999714	30515262/3637036/3636860	CAALFM_C403930CA/CAALFM_C701600WA/SEC62	cal:CAALFM_C403930CA/cal:CAALFM_C701600WA/cal:CAALFM_C103340CA	3	1	30515262	2	3637036/3636860
cal04130	SNARE interactions in vesicular transport	3/436	19/1949	0.833066	0.999714	3645120/3643791/3636525	SYN8/CAALFM_C209680WA/CAALFM_C504150CA	cal:CAALFM_CR03140CA/cal:CAALFM_C209680WA/cal:CAALFM_C504150CA	3	1	3636525	2	3645120/3643791
cal03020	RNA polymerase	5/436	30/1949	0.835382	0.999714	3647593/3647677/3643481/3637996/3643427	CAALFM_CR05550CA/RPA190/CAALFM_C207200WA/RPA135/RPC40	cal:CAALFM_CR05550CA/cal:CAALFM_C110670CA/cal:CAALFM_C207200WA/cal:CAALFM_C700570WA/cal:CAALFM_C205340CA	5	0		5	3647593/3647677/3643481/3637996/3643427
cal00270	Cysteine and methionine metabolism	7/436	41/1949	0.844785	0.999714	3636452/3635636/3644538/3640084/3644414/3642238/3644116	SAH1/MDH1-1/SAM2/MET6/CAALFM_C111100WA/CAALFM_C306280WA/SPE2	cal:CAALFM_C504270CA/cal:CAALFM_C401900CA/cal:CAALFM_C111450CA/cal:CAALFM_CR01620CA/cal:CAALFM_C111100WA/cal:CAALFM_C306280WA/cal:CAALFM_C500700CA	7	3	3635636/3644414/3644116	4	3636452/3644538/3640084/3642238
cal03013	Nucleocytoplasmic transport	11/436	62/1949	0.852531	0.999714	3635688/3639840/3635712/3640252/3645351/3647413/3646614/3646502/3647853/3646925/3638812	MLP1/CAALFM_C105630CA/CAALFM_C401660WA/CAALFM_C603460WA/NUP84/CAALFM_C405180CA/NMD3/TEF2/CAALFM_C403850WA/GSP1/POM152	cal:CAALFM_C401060WA/cal:CAALFM_C105630CA/cal:CAALFM_C401660WA/cal:CAALFM_C603460WA/cal:CAALFM_C403800CA/cal:CAALFM_C405180CA/cal:CAALFM_CR06720WA/cal:CAALFM_C108380WA/cal:CAALFM_C403850WA/cal:CAALFM_C206310CA/cal:CAALFM_C200470WA	11	6	3635688/3635712/3645351/3647413/3647853/3638812	5	3639840/3640252/3646614/3646502/3646925
cal00061	Fatty acid biosynthesis	2/436	14/1949	0.855637	0.999714	3640440/3645321	CAALFM_CR00710CA/MRF1	cal:CAALFM_CR00710CA/cal:CAALFM_C111700CA	2	2	3640440/3645321	0
cal00600	Sphingolipid metabolism	2/436	14/1949	0.855637	0.999714	3642962/3646981	YDC1/HEX1	cal:CAALFM_C407050WA/cal:CAALFM_C503610WA	2	2	3642962/3646981	0
cal01210	2-Oxocarboxylic acid metabolism	5/436	32/1949	0.875538	0.999714	3638034/3641131/3634893/3634830/3642979	LEU2/ARG8/IDH1/ARG5%2C6/IDH2	cal:CAALFM_C700400WA/cal:CAALFM_C405070CA/cal:CAALFM_C109630WA/cal:CAALFM_C109290CA/cal:CAALFM_C203080WA	5	2	3641131/3634830	3	3638034/3634893/3642979
cal00030	Pentose phosphate pathway	3/436	21/1949	0.881227	0.999714	3634913/3635594/3640767	ZWF1/CAALFM_C401820CA/TKL1	cal:CAALFM_C108980CA/cal:CAALFM_C401820CA/cal:CAALFM_C108320WA	3	3	3634913/3635594/3640767	0
cal00770	Pantothenate and CoA biosynthesis	3/436	22/1949	0.900332	0.999714	3639287/3636954/3636459	CAALFM_C100410CA/CAALFM_C702010CA/CAALFM_C505130CA	cal:CAALFM_C100410CA/cal:CAALFM_C702010CA/cal:CAALFM_C505130CA	3	3	3639287/3636954/3636459	0
cal04136	Autophagy - other	3/436	22/1949	0.900332	0.999714	3639540/3644040/3637830	VPS34/VPS15/CAALFM_C402670WA	cal:CAALFM_C106680WA/cal:CAALFM_C601190CA/cal:CAALFM_C402670WA	3	3	3639540/3644040/3637830	0
cal00052	Galactose metabolism	2/436	16/1949	0.903338	0.999714	3636421/3641015	CAALFM_C504940WA/HXK2	cal:CAALFM_C504940WA/cal:CAALFM_CR04510WA	2	1	3636421	1	3641015
cal03022	Basal transcription factors	5/436	34/1949	0.907067	0.999714	3637926/3643310/30515021/3647134/3642252	CAALFM_C403090WA/NPL3/CAALFM_C107280CA/CAALFM_C600640CA/TAF60	cal:CAALFM_C403090WA/cal:CAALFM_C114280CA/cal:CAALFM_C107280CA/cal:CAALFM_C600640CA/cal:CAALFM_C306650CA	5	4	3637926/30515021/3647134/3642252	1	3643310
cal00520	Amino sugar and nucleotide sugar metabolism	5/436	35/1949	0.920044	0.999714	3647454/3641015/3645967/3646981/3636523	SRB1/HXK2/DAC1/HEX1/CHT2	cal:CAALFM_C307950CA/cal:CAALFM_CR04510WA/cal:CAALFM_C604600WA/cal:CAALFM_C503610WA/cal:CAALFM_C504130CA	5	1	3646981	4	3647454/3641015/3645967/3636523
cal03420	Nucleotide excision repair	7/436	50/1949	0.952963	0.999714	3647757/3635834/3643481/3638462/30515021/3647134/3638414	CAALFM_C300830CA/RAD23/CAALFM_C207200WA/CAALFM_C307660WA/CAALFM_C107280CA/CAALFM_C600640CA/CAALFM_C302770CA	cal:CAALFM_C300830CA/cal:CAALFM_C201850WA/cal:CAALFM_C207200WA/cal:CAALFM_C307660WA/cal:CAALFM_C107280CA/cal:CAALFM_C600640CA/cal:CAALFM_C302770CA	7	4	3638462/30515021/3647134/3638414	3	3647757/3635834/3643481
cal03440	Homologous recombination	2/436	20/1949	0.958015	0.999714	3648281/3647148	RAD59/RAD52	cal:CAALFM_C405270CA/cal:CAALFM_C600510CA	2	1	3648281	1	3647148
cal03015	mRNA surveillance pathway	6/436	46/1949	0.963959	0.999714	3635713/3643785/3640289/3637979/3645129/3646911	CAALFM_C401650CA/SUP35/SAL6/CAALFM_C700250CA/SSU72/CAALFM_C206230WA	cal:CAALFM_C401650CA/cal:CAALFM_C209720WA/cal:CAALFM_C603830WA/cal:CAALFM_C700250CA/cal:CAALFM_CR03210CA/cal:CAALFM_C206230WA	6	1	3635713	5	3643785/3640289/3637979/3645129/3646911
cal03030	DNA replication	4/436	34/1949	0.964593	0.999714	3636401/3639238/3647757/3639237	CAALFM_C505350WA/CAALFM_C602880WA/CAALFM_C300830CA/RNH1	cal:CAALFM_C505350WA/cal:CAALFM_C602880WA/cal:CAALFM_C300830CA/cal:CAALFM_C602870WA	4	1	3636401	3	3639238/3647757/3639237
cal01250	Biosynthesis of nucleotide sugars	2/436	21/1949	0.966098	0.999714	3647454/3641015	SRB1/HXK2	cal:CAALFM_C307950CA/cal:CAALFM_CR04510WA	2	0		2	3647454/3641015
cal03430	Mismatch repair	2/436	21/1949	0.966098	0.999714	3642939/3647757	MSH2/CAALFM_C300830CA	cal:CAALFM_C407120CA/cal:CAALFM_C300830CA	2	1	3642939	1	3647757
cal00564	Glycerophospholipid metabolism	6/436	47/1949	0.969164	0.999714	3647150/3645212/3645743/3644563/3635275/3635779	CAALFM_C600490WA/LPT1/PCT1/GPD2/CAALFM_C304350CA/SMP2	cal:CAALFM_C600490WA/cal:CAALFM_C207480WA/cal:CAALFM_C400570CA/cal:CAALFM_C602010CA/cal:CAALFM_C304350CA/cal:CAALFM_C201550WA	6	4	3645212/3645743/3635275/3635779	2	3647150/3644563
cal00920	Sulfur metabolism	1/436	14/1949	0.971522	0.999714	3639234	APA2	cal:CAALFM_C603410CA	1	0		1	3639234
cal04120	Ubiquitin mediated proteolysis	6/436	48/1949	0.973672	0.999714	3646155/3640513/3639383/3648267/3638414/3638927	CAALFM_C405220CA/CAALFM_C300520WA/APC1/CAALFM_C500560WA/CAALFM_C302770CA/UBC4	cal:CAALFM_C405220CA/cal:CAALFM_C300520WA/cal:CAALFM_C100600WA/cal:CAALFM_C500560WA/cal:CAALFM_C302770CA/cal:CAALFM_CR09970WA	6	3	3646155/3639383/3638414	3	3640513/3648267/3638927
cal03010	Ribosome	18/436	119/1949	0.984027	0.999714	30515291/3644560/3639724/3639723/3641383/3643513/3647879/3640968/3639497/3643446/30515335/30515301/3642339/3637954/3643347/30515338/3640303/3635156	CAALFM_C500320WA/CAALFM_C601980CA/MRPL6/CAALFM_CR00490WA/CAALFM_C703000CA/CAALFM_C207190CA/CAALFM_C500030WA/MRPL40/MRPL19/MRPL10/RPL32/CAALFM_C501540WA/CAALFM_C207680WA/YML6/RPL4B/RPL25/CAALFM_C603730CA/RPL18	cal:CAALFM_C500320WA/cal:CAALFM_C601980CA/cal:CAALFM_CR00480WA/cal:CAALFM_CR00490WA/cal:CAALFM_C703000CA/cal:CAALFM_C207190CA/cal:CAALFM_C500030WA/cal:CAALFM_CR04010CA/cal:CAALFM_C106790CA/cal:CAALFM_C205000CA/cal:CAALFM_C601700WA/cal:CAALFM_C501540WA/cal:CAALFM_C207680WA/cal:CAALFM_C700950WA/cal:CAALFM_C114110CA/cal:CAALFM_C601970CA/cal:CAALFM_C603730CA/cal:CAALFM_C305100CA	18	0		18	30515291/3644560/3639724/3639723/3641383/3643513/3647879/3640968/3639497/3643446/30515335/30515301/3642339/3637954/3643347/30515338/3640303/3635156
cal00400	Phenylalanine, tyrosine and tryptophan biosynthesis	1/436	19/1949	0.992067	0.999714	3645756	HIS5	cal:CAALFM_C400650WA	1	1	3645756	0
cal03018	RNA degradation	5/436	54/1949	0.996965	0.999714	3646278/3646152/3645115/3642002/3635642	CDC39/EDC3/NOT4/CAALFM_C111930WA/CAALFM_C402090CA	cal:CAALFM_C604270WA/cal:CAALFM_C405190CA/cal:CAALFM_CR03420CA/cal:CAALFM_C111930WA/cal:CAALFM_C402090CA	5	2	3646152/3635642	3	3646278/3645115/3642002
cal04111	Cell cycle - yeast	12/436	98/1949	0.997034	0.999714	3647733/3646155/3637922/3646356/3645737/3639383/3641888/3637952/3642789/3648188/3643424/3641815	MEC1/CAALFM_C405220CA/BUB1/PCL1/CAALFM_CR06960WA/APC1/MPS1/YOX1/CEK1/MIH1/CDC7/BRN1	cal:CAALFM_C504060CA/cal:CAALFM_C405220CA/cal:CAALFM_C403120CA/cal:CAALFM_C503310CA/cal:CAALFM_CR06960WA/cal:CAALFM_C100600WA/cal:CAALFM_CR08960CA/cal:CAALFM_C700970CA/cal:CAALFM_C406480CA/cal:CAALFM_C300800WA/cal:CAALFM_C205320WA/cal:CAALFM_C405660CA	12	9	3647733/3646155/3637922/3646356/3645737/3639383/3637952/3642789/3641815	3	3641888/3648188/3643424
cal03410	Base excision repair	1/436	25/1949	0.998297	0.999714	3647757	CAALFM_C300830CA	cal:CAALFM_C300830CA	1	0		1	3647757
cal00190	Oxidative phosphorylation	8/436	87/1949	0.999714	0.999714	3640255/3647071/30515088/3643769/3642798/30515345/3640111/30515402	YMX6/COX15/COX17/CAALFM_C502040WA/VMA8/CAALFM_C604250WA/VMA4/VMA13	cal:CAALFM_C603480WA/cal:CAALFM_C600720CA/cal:CAALFM_C201180WA/cal:CAALFM_C502040WA/cal:CAALFM_C406400CA/cal:CAALFM_C604250WA/cal:CAALFM_CR01970CA/cal:CAALFM_CR05080WA	8	3	3642798/3640111/30515402	5	3640255/3647071/30515088/3643769/30515345
