# Supplementary material for: Genetic Insights into the Rheological Phenotype of Candida albicans Biofilms
Source: Research Square preprint supplement (doi:10.21203/rs.3.rs-8555167/v1), 2026-01-20
Supplement: Supplementary file 9 [file b11d5c4193f033b9c89c047a.xlsx]

## Sheet: Sheet1
Cell wall - total carbohydrate
BWP17			pmr1 ∆/∆ (% ref)			kre5 ∆/∆ (% ref)			alg11 ∆/∆ (% ref)
100			130.338			68.8889			342.029
100			124.596			76.0248			454.534
100			117.368			94.3012			521.303
100			83.8803			65.9266			214.768
100			133.594			141.536			272.005
100			82.5342			134.475			238.242
BWP17			pmr1 ∆/∆			kre5 ∆/∆			alg11 ∆/∆
Mean [mg/L]	SEM	N	Mean [mg/L]	SEM	N	Mean [mg/L]	SEM	N	Mean [mg/L]	SEM	N
7788.88	478.436	8	8644.44	778.325	8	7361.1	871.103	8	25838.9	3099.44	8
ECM - total carbohydrate
BWP17			pmr1 ∆/∆ (% ref)			kre5 ∆/∆ (% ref)			alg11 ∆/∆ (% ref)
100			93.0881			32.1746			30.3557
100			92.3788			59.5843			91.3395
100			120.38			86.014			133.916
100			109.962			62.118			134.659
100			113.563			66.1136			138.822
100			39.9485			25.5155			68.4278
100			83.875			44.75			209.75
100			70.9421			52.0999			148.581
BWP17			pmr1 ∆/∆			kre5 ∆/∆			alg11 ∆/∆
Mean [mg/L]	SEM	N	Mean [mg/L]	SEM	N	Mean [mg/L]	SEM	N	Mean [mg/L]	SEM	N
928.881	145.881	8	888.325	195	8	508.659	114.936	8	1030.55	210.936	8
