# Supplementary material for: Genetic Insights into the Rheological Phenotype of Candida albicans Biofilms
Source: Research Square preprint supplement (doi:10.21203/rs.3.rs-8555167/v1), 2026-01-20
Supplement: Supplementary file 10 [file bc5a1f58342dc4d7764dfc1b.xlsx]

## Sheet: alg11_delvsWT.all_GOenrich
Transcriptional profiling (GO Biological Process term enrichment) -- alg11∆/∆ vs wild type
Category	GOID	Description	GeneRatio	BgRatio	pvalue	padj	geneID	geneName	Count	Up	Up_Gene_id	Down	Down_Gene_id
BP	GO:1901605	alpha-amino acid metabolic process	7/241	22/1862	0.017005	0.999718	3639339/3647777/3639321/3638382/3646386/3641195/3645025	LEU4/HIS3/TRP1/MET13/GLN1/CAALFM_C210460CA/HIS4	7	1	3646386	6	3639339/3647777/3639321/3638382/3641195/3645025
BP	GO:0006520	cellular amino acid metabolic process	15/241	66/1862	0.0179539	0.999718	3644012/3640275/3640285/3645956/3639339/3636824/3647777/3639321/3638382/3646386/3645124/3646086/3641195/3635826/3645025	ILV5/NAM2/ALA1/ILS1/LEU4/FRS2/HIS3/TRP1/MET13/GLN1/CAALFM_CR03110WA/CAALFM_C600390WA/CAALFM_C210460CA/HOM2/HIS4	15	2	3636824/3646386	13	3644012/3640275/3640285/3645956/3639339/3647777/3639321/3638382/3645124/3646086/3641195/3635826/3645025
BP	GO:0030001	metal ion transport	8/241	28/1862	0.0213389	0.999718	3634826/3639546/3639861/3647441/3648427/3644476/3635752/3636616	CRP1/HAK1/PHO87/MID1/CTR2/CCS1/CAALFM_C202180WA/ALR1	8	7	3634826/3639546/3639861/3647441/3648427/3635752/3636616	1	3644476
BP	GO:0008652	cellular amino acid biosynthetic process	6/241	19/1862	0.0277268	0.999718	3644012/3639339/3647777/3646386/3635826/3645025	ILV5/LEU4/HIS3/GLN1/HOM2/HIS4	6	1	3646386	5	3644012/3639339/3647777/3635826/3645025
BP	GO:0016042	lipid catabolic process	6/241	19/1862	0.0277268	0.999718	3634797/3645987/3634854/3644561/3644562/3635724	LIP3/LIP4/LIP2/PLB1/PLB2/PLB4.5	6	4	3634797/3634854/3644561/3635724	2	3645987/3644562
BP	GO:0055085	transmembrane transport	42/241	250/1862	0.0349329	0.999718	3638048/3642634/3639870/3647697/3639260/3640573/3637827/3641932/3645361/3636802/3640768/3637701/3642635/3641625/3642793/3634898/3640093/3640244/3646284/3643440/3637048/3636968/3646404/3643209/3640558/3639546/3635684/3639861/3647466/3647441/3648427/3640956/3646954/3646047/3635752/3636616/3647141/3645969/3641882/3636130/3641617/3639256	HGT12/GIT3/CAALFM_C106000WA/OPT4/MDR1/NGT1/TNA1/CAALFM_CR09390CA/CAALFM_C403700WA/HNM4/OPT5/CAALFM_C503080CA/GIT4/CAALFM_C601870CA/CAALFM_C406440CA/CAALFM_C109220WA/HNM3/CAALFM_C603540WA/ATM1/ITR1/FLU1/TOM40/HGT9/HXT5/HGT19/HAK1/AGP2/PHO87/CAALFM_C307850WA/MID1/CTR2/TPO4/GAP5/CAALFM_CR07480WA/CAALFM_C202180WA/ALR1/NHX1/NAG3/SSU1/DAL7/CAALFM_C601520WA/MDL2	42	29	3642634/3639870/3647697/3640573/3641932/3645361/3636802/3640768/3637701/3642635/3642793/3634898/3643440/3637048/3646404/3643209/3640558/3639546/3635684/3639861/3647441/3648427/3640956/3646954/3646047/3635752/3636616/3641882/3636130	13	3638048/3639260/3637827/3641625/3640093/3640244/3646284/3636968/3647466/3647141/3645969/3641617/3639256
BP	GO:0046434	organophosphate catabolic process	5/241	16/1862	0.0455964	0.999718	3637713/3643924/3644561/3644562/3635724	PDE1/GPD1/PLB1/PLB2/PLB4.5	5	4	3637713/3643924/3644561/3635724	1	3644562
BP	GO:0055114	oxidation-reduction process	42/241	255/1862	0.0468769	0.999718	3644012/3640295/3647233/3644060/3647153/3635693/3640751/3639205/3647071/3643778/3645950/3638532/3644010/3642612/3639239/3642919/3634945/3643654/3645036/3639700/3647131/3645100/3642639/3639233/3641618/3642989/3635716/3637751/3638382/3647407/3643890/3643924/3642921/3641195/3647318/3635826/3644127/3638961/3644077/3645025/3638393/3647561	ILV5/CAALFM_C603600CA/CAALFM_C503770CA/EBP1/FET3/CAALFM_C402230CA/ADH2/CAALFM_C602560WA/COX15/SMM1/CAALFM_C604410CA/PRO2/CAALFM_C600850WA/CFL5/HPD1/OYE32/AOX2/CAALFM_C305640WA/PRO3/ALK2/FET34/IFR2/CFL4/QCR7/OYE23/RNR1/ERG251/CAALFM_C502920WA/MET13/ALD6/CAALFM_C208850CA/GPD1/GUT2/CAALFM_C210460CA/CAALFM_CR06870CA/HOM2/CAALFM_C500810CA/XYL2/ECM17/HIS4/AIP2/MCR1	42	19	3640295/3647233/3635693/3640751/3643778/3642612/3639239/3634945/3643654/3639700/3642639/3635716/3637751/3647407/3643890/3643924/3642921/3647318/3644127	23	3644012/3644060/3647153/3639205/3647071/3645950/3638532/3644010/3642919/3645036/3647131/3645100/3639233/3641618/3642989/3638382/3641195/3635826/3638961/3644077/3645025/3638393/3647561
BP	GO:0006644	phospholipid metabolic process	7/241	28/1862	0.0600121	0.999718	3638966/3644557/3641607/3637849/3644561/3644562/3635724	INO1/CHO1/CAALFM_C601370WA/CAALFM_C402420CA/PLB1/PLB2/PLB4.5	7	3	3644557/3644561/3635724	4	3638966/3641607/3637849/3644562
BP	GO:0044283	small molecule biosynthetic process	10/241	47/1862	0.0726904	0.999718	3644012/3643784/3638966/3639339/3647777/3637713/3646386/3636812/3635826/3645025	ILV5/IPK2/INO1/LEU4/HIS3/PDE1/GLN1/SNO1/HOM2/HIS4	10	4	3643784/3637713/3646386/3636812	6	3644012/3638966/3639339/3647777/3635826/3645025
BP	GO:0006629	lipid metabolic process	15/241	82/1862	0.0990386	0.999718	3634797/3638966/3644557/3645987/3634854/3638406/3635716/3641607/3642985/3637849/3636505/3640755/3644561/3644562/3635724	LIP3/INO1/CHO1/LIP4/LIP2/SLD1/ERG251/CAALFM_C601370WA/PLC2/CAALFM_C402420CA/GDE1/OLE1/PLB1/PLB2/PLB4.5	15	10	3634797/3644557/3634854/3638406/3635716/3642985/3636505/3640755/3644561/3635724	5	3638966/3645987/3641607/3637849/3644562
BP	GO:0006413	translational initiation	3/241	10/1862	0.128945	0.999718	3647730/3636455/3645426	SUI1/CAALFM_C504290CA/CAALFM_C101900CA	3	2	3647730/3636455	1	3645426
BP	GO:0065008	regulation of biological quality	7/241	34/1862	0.140229	0.999718	3642631/3648085/3646660/3646043/3647441/3641183/3641367	TRX2/CAALFM_C406130WA/CAALFM_C107630WA/ARC15/MID1/CAALFM_C404180CA/PDI1	7	4	3642631/3648085/3646043/3647441	3	3646660/3641183/3641367
BP	GO:1901607	alpha-amino acid biosynthetic process	4/241	16/1862	0.142277	0.999718	3639339/3647777/3646386/3645025	LEU4/HIS3/GLN1/HIS4	4	1	3646386	3	3639339/3647777/3645025
BP	GO:0006082	organic acid metabolic process	15/241	87/1862	0.145077	0.999718	3644012/3640275/3640285/3645956/3639339/3636824/3647777/3639321/3638382/3646386/3645124/3646086/3641195/3635826/3645025	ILV5/NAM2/ALA1/ILS1/LEU4/FRS2/HIS3/TRP1/MET13/GLN1/CAALFM_CR03110WA/CAALFM_C600390WA/CAALFM_C210460CA/HOM2/HIS4	15	2	3636824/3646386	13	3644012/3640275/3640285/3645956/3639339/3647777/3639321/3638382/3645124/3646086/3641195/3635826/3645025
BP	GO:0019752	carboxylic acid metabolic process	15/241	87/1862	0.145077	0.999718	3644012/3640275/3640285/3645956/3639339/3636824/3647777/3639321/3638382/3646386/3645124/3646086/3641195/3635826/3645025	ILV5/NAM2/ALA1/ILS1/LEU4/FRS2/HIS3/TRP1/MET13/GLN1/CAALFM_CR03110WA/CAALFM_C600390WA/CAALFM_C210460CA/HOM2/HIS4	15	2	3636824/3646386	13	3644012/3640275/3640285/3645956/3639339/3647777/3639321/3638382/3645124/3646086/3641195/3635826/3645025
BP	GO:0043436	oxoacid metabolic process	15/241	87/1862	0.145077	0.999718	3644012/3640275/3640285/3645956/3639339/3636824/3647777/3639321/3638382/3646386/3645124/3646086/3641195/3635826/3645025	ILV5/NAM2/ALA1/ILS1/LEU4/FRS2/HIS3/TRP1/MET13/GLN1/CAALFM_CR03110WA/CAALFM_C600390WA/CAALFM_C210460CA/HOM2/HIS4	15	2	3636824/3646386	13	3644012/3640275/3640285/3645956/3639339/3647777/3639321/3638382/3645124/3646086/3641195/3635826/3645025
BP	GO:0051179	localization	57/241	390/1862	0.153524	0.999718	3638048/3642634/3639870/3647697/3639260/3640573/3637827/3641932/3634826/3645361/3636802/3640768/3641631/3647897/3645870/3642791/3637701/3642635/3641625/3642793/3634898/3648085/3640093/3640244/3646284/3643440/3637048/3636968/3646404/3643209/3640558/3639546/3635684/3639861/3638440/3647466/3645976/3647441/3648427/3644476/3636457/3640956/3636553/3646954/3646047/3635752/3636616/3647141/3645969/3644442…	HGT12/GIT3/CAALFM_C106000WA/OPT4/MDR1/NGT1/TNA1/CAALFM_CR09390CA/CRP1/CAALFM_C403700WA/HNM4/OPT5/CTA1/HET1/SEC27/CAALFM_C406460CA/CAALFM_C503080CA/GIT4/CAALFM_C601870CA/CAALFM_C406440CA/CAALFM_C109220WA/CAALFM_C406130WA/HNM3/CAALFM_C603540WA/ATM1/ITR1/FLU1/TOM40/HGT9/HXT5/HGT19/HAK1/AGP2/PHO87/CAALFM_C307130WA/CAALFM_C307850WA/CAALFM_C604550CA/MID1/CTR2/CCS1/TIP20/TPO4/MEP1/GAP5/CAALFM_CR07480WA/…	57	36	3642634/3639870/3647697/3640573/3641932/3634826/3645361/3636802/3640768/3642791/3637701/3642635/3642793/3634898/3648085/3643440/3637048/3646404/3643209/3640558/3639546/3635684/3639861/3647441/3648427/3636457/3640956/3636553/3646954/3646047/3635752/3636616/3641882/3637401/3636130/3636511	21	3638048/3639260/3637827/3641631/3647897/3645870/3641625/3640093/3640244/3646284/3636968/3638440/3647466/3645976/3644476/3647141/3645969/3644442/3641183/3641617/3639256
BP	GO:0019637	organophosphate metabolic process	13/241	75/1862	0.162486	0.999718	3643784/3638966/3644557/3639192/3639233/3641607/3637849/3637713/3643924/3636812/3644561/3644562/3635724	IPK2/INO1/CHO1/CAALFM_C602980CA/QCR7/CAALFM_C601370WA/CAALFM_C402420CA/PDE1/GPD1/SNO1/PLB1/PLB2/PLB4.5	13	8	3643784/3644557/3639192/3637713/3643924/3636812/3644561/3635724	5	3638966/3639233/3641607/3637849/3644562
BP	GO:0016053	organic acid biosynthetic process	6/241	29/1862	0.162847	0.999718	3644012/3639339/3647777/3646386/3635826/3645025	ILV5/LEU4/HIS3/GLN1/HOM2/HIS4	6	1	3646386	5	3644012/3639339/3647777/3635826/3645025
BP	GO:0046394	carboxylic acid biosynthetic process	6/241	29/1862	0.162847	0.999718	3644012/3639339/3647777/3646386/3635826/3645025	ILV5/LEU4/HIS3/GLN1/HOM2/HIS4	6	1	3646386	5	3644012/3639339/3647777/3635826/3645025
BP	GO:0019725	cellular homeostasis	4/241	17/1862	0.168205	0.999718	3642631/3646660/3647441/3641367	TRX2/CAALFM_C107630WA/MID1/PDI1	4	2	3642631/3647441	2	3646660/3641367
BP	GO:0065007	biological regulation	40/241	268/1862	0.171396	0.999718	3641635/3636434/3637920/3642631/3637342/3635661/3645016/3648085/3641244/3637052/3636950/3643757/3648000/3646660/3642563/3645762/3646043/3647441/3643298/3636877/3637706/3636453/3641541/3641886/3647713/3640208/3635819/3645874/3637727/3643823/3634947/3647315/3646953/3637862/3641183/3636535/3644458/3641370/3639303/3641367	ZCF18/SFL2/RGT1/TRX2/ADAEC/RGA2/CAALFM_C400390WA/CAALFM_C406130WA/GAL4/IQG1/CUP9/HAL9/ECM22/CAALFM_C107630WA/GZF3/ZCF21/ARC15/MID1/GDI1/PDE2/SUT1/GLN3/BUD2/UGA33/CAALFM_C209460CA/STB5/CAALFM_C202530WA/CAALFM_C602300CA/ZCF22/GCN4/CTA8/BUD5/TSC2/ARG83/CAALFM_C404180CA/PPR1/YPD1/ZCF29/RCA1/PDI1	40	29	3636434/3637920/3642631/3637342/3635661/3648085/3641244/3637052/3636950/3643757/3648000/3642563/3645762/3646043/3647441/3636877/3637706/3636453/3641541/3647713/3635819/3637727/3643823/3634947/3647315/3646953/3637862/3636535/3641370	11	3641635/3645016/3646660/3643298/3641886/3640208/3645874/3641183/3644458/3639303/3641367
BP	GO:0044281	small molecule metabolic process	24/241	153/1862	0.175242	0.999718	3644012/3640275/3643784/3638966/3640285/3644591/3636649/3645956/3639192/3639233/3639339/3636824/3647777/3639321/3638382/3637713/3646386/3634895/3645124/3646086/3636812/3641195/3635826/3645025	ILV5/NAM2/IPK2/INO1/ALA1/GAL7/URA3/ILS1/CAALFM_C602980CA/QCR7/LEU4/FRS2/HIS3/TRP1/MET13/PDE1/GLN1/DAK2/CAALFM_CR03110WA/CAALFM_C600390WA/SNO1/CAALFM_C210460CA/HOM2/HIS4	24	8	3643784/3644591/3636649/3639192/3636824/3637713/3646386/3636812	16	3644012/3640275/3638966/3640285/3645956/3639233/3639339/3647777/3639321/3638382/3634895/3645124/3646086/3641195/3635826/3645025
BP	GO:0006810	transport	55/241	381/1862	0.186631	0.999718	3638048/3642634/3639870/3647697/3639260/3640573/3637827/3641932/3634826/3645361/3636802/3640768/3641631/3647897/3645870/3642791/3637701/3642635/3641625/3642793/3634898/3640093/3640244/3646284/3643440/3637048/3636968/3646404/3643209/3640558/3639546/3635684/3639861/3638440/3647466/3645976/3647441/3648427/3644476/3636457/3640956/3636553/3646954/3646047/3635752/3636616/3647141/3645969/3644442/3641882…	HGT12/GIT3/CAALFM_C106000WA/OPT4/MDR1/NGT1/TNA1/CAALFM_CR09390CA/CRP1/CAALFM_C403700WA/HNM4/OPT5/CTA1/HET1/SEC27/CAALFM_C406460CA/CAALFM_C503080CA/GIT4/CAALFM_C601870CA/CAALFM_C406440CA/CAALFM_C109220WA/HNM3/CAALFM_C603540WA/ATM1/ITR1/FLU1/TOM40/HGT9/HXT5/HGT19/HAK1/AGP2/PHO87/CAALFM_C307130WA/CAALFM_C307850WA/CAALFM_C604550CA/MID1/CTR2/CCS1/TIP20/TPO4/MEP1/GAP5/CAALFM_CR07480WA/CAALFM_C202180WA/…	55	35	3642634/3639870/3647697/3640573/3641932/3634826/3645361/3636802/3640768/3642791/3637701/3642635/3642793/3634898/3643440/3637048/3646404/3643209/3640558/3639546/3635684/3639861/3647441/3648427/3636457/3640956/3636553/3646954/3646047/3635752/3636616/3641882/3637401/3636130/3636511	20	3638048/3639260/3637827/3641631/3647897/3645870/3641625/3640093/3640244/3646284/3636968/3638440/3647466/3645976/3644476/3647141/3645969/3644442/3641617/3639256
BP	GO:0050790	regulation of catalytic activity	3/241	12/1862	0.195412	0.999718	3637052/3641541/3646953	IQG1/BUD2/TSC2	3	3	3637052/3641541/3646953	0
BP	GO:0065009	regulation of molecular function	3/241	12/1862	0.195412	0.999718	3637052/3641541/3646953	IQG1/BUD2/TSC2	3	3	3637052/3641541/3646953	0
BP	GO:0008654	phospholipid biosynthetic process	4/241	18/1862	0.195646	0.999718	3638966/3644557/3641607/3637849	INO1/CHO1/CAALFM_C601370WA/CAALFM_C402420CA	4	1	3644557	3	3638966/3641607/3637849
BP	GO:0051234	establishment of localization	55/241	383/1862	0.198954	0.999718	3638048/3642634/3639870/3647697/3639260/3640573/3637827/3641932/3634826/3645361/3636802/3640768/3641631/3647897/3645870/3642791/3637701/3642635/3641625/3642793/3634898/3640093/3640244/3646284/3643440/3637048/3636968/3646404/3643209/3640558/3639546/3635684/3639861/3638440/3647466/3645976/3647441/3648427/3644476/3636457/3640956/3636553/3646954/3646047/3635752/3636616/3647141/3645969/3644442/3641882…	HGT12/GIT3/CAALFM_C106000WA/OPT4/MDR1/NGT1/TNA1/CAALFM_CR09390CA/CRP1/CAALFM_C403700WA/HNM4/OPT5/CTA1/HET1/SEC27/CAALFM_C406460CA/CAALFM_C503080CA/GIT4/CAALFM_C601870CA/CAALFM_C406440CA/CAALFM_C109220WA/HNM3/CAALFM_C603540WA/ATM1/ITR1/FLU1/TOM40/HGT9/HXT5/HGT19/HAK1/AGP2/PHO87/CAALFM_C307130WA/CAALFM_C307850WA/CAALFM_C604550CA/MID1/CTR2/CCS1/TIP20/TPO4/MEP1/GAP5/CAALFM_CR07480WA/CAALFM_C202180WA/…	55	35	3642634/3639870/3647697/3640573/3641932/3634826/3645361/3636802/3640768/3642791/3637701/3642635/3642793/3634898/3643440/3637048/3646404/3643209/3640558/3639546/3635684/3639861/3647441/3648427/3636457/3640956/3636553/3646954/3646047/3635752/3636616/3641882/3637401/3636130/3636511	20	3638048/3639260/3637827/3641631/3647897/3645870/3641625/3640093/3640244/3646284/3636968/3638440/3647466/3645976/3644476/3647141/3645969/3644442/3641617/3639256
BP	GO:0050794	regulation of cellular process	37/241	253/1862	0.222393	0.999718	3641635/3636434/3637920/3642631/3637342/3635661/3645016/3641244/3637052/3636950/3643757/3648000/3646660/3642563/3645762/3646043/3643298/3636877/3637706/3636453/3641541/3641886/3647713/3640208/3635819/3645874/3637727/3643823/3634947/3647315/3646953/3637862/3636535/3644458/3641370/3639303/3641367	ZCF18/SFL2/RGT1/TRX2/ADAEC/RGA2/CAALFM_C400390WA/GAL4/IQG1/CUP9/HAL9/ECM22/CAALFM_C107630WA/GZF3/ZCF21/ARC15/GDI1/PDE2/SUT1/GLN3/BUD2/UGA33/CAALFM_C209460CA/STB5/CAALFM_C202530WA/CAALFM_C602300CA/ZCF22/GCN4/CTA8/BUD5/TSC2/ARG83/PPR1/YPD1/ZCF29/RCA1/PDI1	37	27	3636434/3637920/3642631/3637342/3635661/3641244/3637052/3636950/3643757/3648000/3642563/3645762/3646043/3636877/3637706/3636453/3641541/3647713/3635819/3637727/3643823/3634947/3647315/3646953/3637862/3636535/3641370	10	3641635/3645016/3646660/3643298/3641886/3640208/3645874/3644458/3639303/3641367
BP	GO:0051188	cofactor biosynthetic process	5/241	26/1862	0.239579	0.999718	3647071/3639192/3645211/3636812/3641233	COX15/CAALFM_C602980CA/HEM15/SNO1/CAALFM_C210860CA	5	2	3639192/3636812	3	3647071/3645211/3641233
BP	GO:0006793	phosphorus metabolic process	28/241	190/1862	0.249595	0.999718	3644836/3643773/3634866/3643784/3638966/3644557/3637799/3647858/3639192/3639233/3644580/3647801/3636228/3641607/3646075/3648101/3637849/3636912/3637713/3636636/3639281/3643924/3636812/3644561/3644562/3635724/3639498/3643482	CAALFM_CR06040WA/ACH1/SWE1/IPK2/INO1/CHO1/CAALFM_C503150WA/PTP2/CAALFM_C602980CA/QCR7/SHA3/YAK1/KNS1/CAALFM_C601370WA/PKH3/DBF2/CAALFM_C402420CA/CAALFM_C103470CA/PDE1/CAALFM_C302260CA/CDC5/GPD1/SNO1/PLB1/PLB2/PLB4.5/NPR1/TPK2	28	20	3644836/3643773/3634866/3643784/3644557/3637799/3647858/3639192/3644580/3647801/3636228/3648101/3636912/3637713/3639281/3643924/3636812/3644561/3635724/3643482	8	3638966/3639233/3641607/3646075/3637849/3636636/3644562/3639498
BP	GO:0044255	cellular lipid metabolic process	7/241	40/1862	0.253347	0.999718	3638966/3644557/3641607/3637849/3644561/3644562/3635724	INO1/CHO1/CAALFM_C601370WA/CAALFM_C402420CA/PLB1/PLB2/PLB4.5	7	3	3644557/3644561/3635724	4	3638966/3641607/3637849/3644562
BP	GO:0050789	regulation of biological process	37/241	257/1862	0.255251	0.999718	3641635/3636434/3637920/3642631/3637342/3635661/3645016/3641244/3637052/3636950/3643757/3648000/3646660/3642563/3645762/3646043/3643298/3636877/3637706/3636453/3641541/3641886/3647713/3640208/3635819/3645874/3637727/3643823/3634947/3647315/3646953/3637862/3636535/3644458/3641370/3639303/3641367	ZCF18/SFL2/RGT1/TRX2/ADAEC/RGA2/CAALFM_C400390WA/GAL4/IQG1/CUP9/HAL9/ECM22/CAALFM_C107630WA/GZF3/ZCF21/ARC15/GDI1/PDE2/SUT1/GLN3/BUD2/UGA33/CAALFM_C209460CA/STB5/CAALFM_C202530WA/CAALFM_C602300CA/ZCF22/GCN4/CTA8/BUD5/TSC2/ARG83/PPR1/YPD1/ZCF29/RCA1/PDI1	37	27	3636434/3637920/3642631/3637342/3635661/3641244/3637052/3636950/3643757/3648000/3642563/3645762/3646043/3636877/3637706/3636453/3641541/3647713/3635819/3637727/3643823/3634947/3647315/3646953/3637862/3636535/3641370	10	3641635/3645016/3646660/3643298/3641886/3640208/3645874/3644458/3639303/3641367
BP	GO:0006812	cation transport	10/241	61/1862	0.257919	0.999718	3634826/3639546/3639861/3647441/3648427/3644476/3636553/3635752/3636616/3647141	CRP1/HAK1/PHO87/MID1/CTR2/CCS1/MEP1/CAALFM_C202180WA/ALR1/NHX1	10	8	3634826/3639546/3639861/3647441/3648427/3636553/3635752/3636616	2	3644476/3647141
BP	GO:0006790	sulfur compound metabolic process	3/241	14/1862	0.268164	0.999718	3643773/3638382/3641195	ACH1/MET13/CAALFM_C210460CA	3	1	3643773	2	3638382/3641195
BP	GO:0007264	small GTPase mediated signal transduction	3/241	14/1862	0.268164	0.999718	3643298/3647315/3646953	GDI1/BUD5/TSC2	3	2	3647315/3646953	1	3643298
BP	GO:0043038	amino acid activation	6/241	34/1862	0.271437	0.999718	3640275/3640285/3645956/3636824/3645124/3646086	NAM2/ALA1/ILS1/FRS2/CAALFM_CR03110WA/CAALFM_C600390WA	6	1	3636824	5	3640275/3640285/3645956/3645124/3646086
BP	GO:0043039	tRNA aminoacylation	6/241	34/1862	0.271437	0.999718	3640275/3640285/3645956/3636824/3645124/3646086	NAM2/ALA1/ILS1/FRS2/CAALFM_CR03110WA/CAALFM_C600390WA	6	1	3636824	5	3640275/3640285/3645956/3645124/3646086
BP	GO:0006355	regulation of transcription, DNA-templated	24/241	164/1862	0.284066	0.999718	3641635/3636434/3637920/3637342/3645016/3641244/3636950/3643757/3648000/3642563/3645762/3637706/3636453/3641886/3647713/3640208/3635819/3637727/3643823/3634947/3637862/3636535/3641370/3639303	ZCF18/SFL2/RGT1/ADAEC/CAALFM_C400390WA/GAL4/CUP9/HAL9/ECM22/GZF3/ZCF21/SUT1/GLN3/UGA33/CAALFM_C209460CA/STB5/CAALFM_C202530WA/ZCF22/GCN4/CTA8/ARG83/PPR1/ZCF29/RCA1	24	19	3636434/3637920/3637342/3641244/3636950/3643757/3648000/3642563/3645762/3637706/3636453/3647713/3635819/3637727/3643823/3634947/3637862/3636535/3641370	5	3641635/3645016/3641886/3640208/3639303
BP	GO:0051252	regulation of RNA metabolic process	24/241	164/1862	0.284066	0.999718	3641635/3636434/3637920/3637342/3645016/3641244/3636950/3643757/3648000/3642563/3645762/3637706/3636453/3641886/3647713/3640208/3635819/3637727/3643823/3634947/3637862/3636535/3641370/3639303	ZCF18/SFL2/RGT1/ADAEC/CAALFM_C400390WA/GAL4/CUP9/HAL9/ECM22/GZF3/ZCF21/SUT1/GLN3/UGA33/CAALFM_C209460CA/STB5/CAALFM_C202530WA/ZCF22/GCN4/CTA8/ARG83/PPR1/ZCF29/RCA1	24	19	3636434/3637920/3637342/3641244/3636950/3643757/3648000/3642563/3645762/3637706/3636453/3647713/3635819/3637727/3643823/3634947/3637862/3636535/3641370	5	3641635/3645016/3641886/3640208/3639303
BP	GO:1903506	regulation of nucleic acid-templated transcription	24/241	164/1862	0.284066	0.999718	3641635/3636434/3637920/3637342/3645016/3641244/3636950/3643757/3648000/3642563/3645762/3637706/3636453/3641886/3647713/3640208/3635819/3637727/3643823/3634947/3637862/3636535/3641370/3639303	ZCF18/SFL2/RGT1/ADAEC/CAALFM_C400390WA/GAL4/CUP9/HAL9/ECM22/GZF3/ZCF21/SUT1/GLN3/UGA33/CAALFM_C209460CA/STB5/CAALFM_C202530WA/ZCF22/GCN4/CTA8/ARG83/PPR1/ZCF29/RCA1	24	19	3636434/3637920/3637342/3641244/3636950/3643757/3648000/3642563/3645762/3637706/3636453/3647713/3635819/3637727/3643823/3634947/3637862/3636535/3641370	5	3641635/3645016/3641886/3640208/3639303
BP	GO:2001141	regulation of RNA biosynthetic process	24/241	164/1862	0.284066	0.999718	3641635/3636434/3637920/3637342/3645016/3641244/3636950/3643757/3648000/3642563/3645762/3637706/3636453/3641886/3647713/3640208/3635819/3637727/3643823/3634947/3637862/3636535/3641370/3639303	ZCF18/SFL2/RGT1/ADAEC/CAALFM_C400390WA/GAL4/CUP9/HAL9/ECM22/GZF3/ZCF21/SUT1/GLN3/UGA33/CAALFM_C209460CA/STB5/CAALFM_C202530WA/ZCF22/GCN4/CTA8/ARG83/PPR1/ZCF29/RCA1	24	19	3636434/3637920/3637342/3641244/3636950/3643757/3648000/3642563/3645762/3637706/3636453/3647713/3635819/3637727/3643823/3634947/3637862/3636535/3641370	5	3641635/3645016/3641886/3640208/3639303
BP	GO:0006457	protein folding	3/241	15/1862	0.305679	0.999718	3644841/3641623/3639350	SIS1/CAALFM_C601460CA/ROT1	3	2	3644841/3639350	1	3641623
BP	GO:0019219	regulation of nucleobase-containing compound metabolic process	24/241	166/1862	0.306223	0.999718	3641635/3636434/3637920/3637342/3645016/3641244/3636950/3643757/3648000/3642563/3645762/3637706/3636453/3641886/3647713/3640208/3635819/3637727/3643823/3634947/3637862/3636535/3641370/3639303	ZCF18/SFL2/RGT1/ADAEC/CAALFM_C400390WA/GAL4/CUP9/HAL9/ECM22/GZF3/ZCF21/SUT1/GLN3/UGA33/CAALFM_C209460CA/STB5/CAALFM_C202530WA/ZCF22/GCN4/CTA8/ARG83/PPR1/ZCF29/RCA1	24	19	3636434/3637920/3637342/3641244/3636950/3643757/3648000/3642563/3645762/3637706/3636453/3647713/3635819/3637727/3643823/3634947/3637862/3636535/3641370	5	3641635/3645016/3641886/3640208/3639303
BP	GO:0006796	phosphate-containing compound metabolic process	27/241	189/1862	0.314463	0.999718	3644836/3634866/3643784/3638966/3644557/3637799/3647858/3639192/3639233/3644580/3647801/3636228/3641607/3646075/3648101/3637849/3636912/3637713/3636636/3639281/3643924/3636812/3644561/3644562/3635724/3639498/3643482	CAALFM_CR06040WA/SWE1/IPK2/INO1/CHO1/CAALFM_C503150WA/PTP2/CAALFM_C602980CA/QCR7/SHA3/YAK1/KNS1/CAALFM_C601370WA/PKH3/DBF2/CAALFM_C402420CA/CAALFM_C103470CA/PDE1/CAALFM_C302260CA/CDC5/GPD1/SNO1/PLB1/PLB2/PLB4.5/NPR1/TPK2	27	19	3644836/3634866/3643784/3644557/3637799/3647858/3639192/3644580/3647801/3636228/3648101/3636912/3637713/3639281/3643924/3636812/3644561/3635724/3643482	8	3638966/3639233/3641607/3646075/3637849/3636636/3644562/3639498
BP	GO:0034622	cellular protein-containing complex assembly	4/241	22/1862	0.315419	0.999718	30515358/3642502/3646233/3646043	HHO1/CAALFM_CR05970CA/ISY1/ARC15	4	3	30515358/3646233/3646043	1	3642502
BP	GO:0007165	signal transduction	8/241	50/1862	0.315898	0.999718	3635661/3637052/3643298/3636877/3641541/3647315/3646953/3644458	RGA2/IQG1/GDI1/PDE2/BUD2/BUD5/TSC2/YPD1	8	6	3635661/3637052/3636877/3641541/3647315/3646953	2	3643298/3644458
BP	GO:0023052	signaling	8/241	50/1862	0.315898	0.999718	3635661/3637052/3643298/3636877/3641541/3647315/3646953/3644458	RGA2/IQG1/GDI1/PDE2/BUD2/BUD5/TSC2/YPD1	8	6	3635661/3637052/3636877/3641541/3647315/3646953	2	3643298/3644458
BP	GO:0043933	protein-containing complex subunit organization	5/241	29/1862	0.318753	0.999718	30515358/3642502/3646233/3646043/3642478	HHO1/CAALFM_CR05970CA/ISY1/ARC15/CAALFM_C105400CA	5	3	30515358/3646233/3646043	2	3642502/3642478
BP	GO:1901575	organic substance catabolic process	11/241	72/1862	0.324163	0.999718	3634797/3645987/3634854/3635164/3639558/3637713/3645874/3643924/3644561/3644562/3635724	LIP3/LIP4/LIP2/CAALFM_C304970CA/CAALFM_C106390WA/PDE1/CAALFM_C602300CA/GPD1/PLB1/PLB2/PLB4.5	11	6	3634797/3634854/3637713/3643924/3644561/3635724	5	3645987/3635164/3639558/3645874/3644562
BP	GO:0009889	regulation of biosynthetic process	24/241	168/1862	0.328929	0.999718	3641635/3636434/3637920/3637342/3645016/3641244/3636950/3643757/3648000/3642563/3645762/3637706/3636453/3641886/3647713/3640208/3635819/3637727/3643823/3634947/3637862/3636535/3641370/3639303	ZCF18/SFL2/RGT1/ADAEC/CAALFM_C400390WA/GAL4/CUP9/HAL9/ECM22/GZF3/ZCF21/SUT1/GLN3/UGA33/CAALFM_C209460CA/STB5/CAALFM_C202530WA/ZCF22/GCN4/CTA8/ARG83/PPR1/ZCF29/RCA1	24	19	3636434/3637920/3637342/3641244/3636950/3643757/3648000/3642563/3645762/3637706/3636453/3647713/3635819/3637727/3643823/3634947/3637862/3636535/3641370	5	3641635/3645016/3641886/3640208/3639303
BP	GO:0010556	regulation of macromolecule biosynthetic process	24/241	168/1862	0.328929	0.999718	3641635/3636434/3637920/3637342/3645016/3641244/3636950/3643757/3648000/3642563/3645762/3637706/3636453/3641886/3647713/3640208/3635819/3637727/3643823/3634947/3637862/3636535/3641370/3639303	ZCF18/SFL2/RGT1/ADAEC/CAALFM_C400390WA/GAL4/CUP9/HAL9/ECM22/GZF3/ZCF21/SUT1/GLN3/UGA33/CAALFM_C209460CA/STB5/CAALFM_C202530WA/ZCF22/GCN4/CTA8/ARG83/PPR1/ZCF29/RCA1	24	19	3636434/3637920/3637342/3641244/3636950/3643757/3648000/3642563/3645762/3637706/3636453/3647713/3635819/3637727/3643823/3634947/3637862/3636535/3641370	5	3641635/3645016/3641886/3640208/3639303
BP	GO:0031326	regulation of cellular biosynthetic process	24/241	168/1862	0.328929	0.999718	3641635/3636434/3637920/3637342/3645016/3641244/3636950/3643757/3648000/3642563/3645762/3637706/3636453/3641886/3647713/3640208/3635819/3637727/3643823/3634947/3637862/3636535/3641370/3639303	ZCF18/SFL2/RGT1/ADAEC/CAALFM_C400390WA/GAL4/CUP9/HAL9/ECM22/GZF3/ZCF21/SUT1/GLN3/UGA33/CAALFM_C209460CA/STB5/CAALFM_C202530WA/ZCF22/GCN4/CTA8/ARG83/PPR1/ZCF29/RCA1	24	19	3636434/3637920/3637342/3641244/3636950/3643757/3648000/3642563/3645762/3637706/3636453/3647713/3635819/3637727/3643823/3634947/3637862/3636535/3641370	5	3641635/3645016/3641886/3640208/3639303
BP	GO:2000112	regulation of cellular macromolecule biosynthetic process	24/241	168/1862	0.328929	0.999718	3641635/3636434/3637920/3637342/3645016/3641244/3636950/3643757/3648000/3642563/3645762/3637706/3636453/3641886/3647713/3640208/3635819/3637727/3643823/3634947/3637862/3636535/3641370/3639303	ZCF18/SFL2/RGT1/ADAEC/CAALFM_C400390WA/GAL4/CUP9/HAL9/ECM22/GZF3/ZCF21/SUT1/GLN3/UGA33/CAALFM_C209460CA/STB5/CAALFM_C202530WA/ZCF22/GCN4/CTA8/ARG83/PPR1/ZCF29/RCA1	24	19	3636434/3637920/3637342/3641244/3636950/3643757/3648000/3642563/3645762/3637706/3636453/3647713/3635819/3637727/3643823/3634947/3637862/3636535/3641370	5	3641635/3645016/3641886/3640208/3639303
BP	GO:0007154	cell communication	8/241	51/1862	0.336427	0.999718	3635661/3637052/3643298/3636877/3641541/3647315/3646953/3644458	RGA2/IQG1/GDI1/PDE2/BUD2/BUD5/TSC2/YPD1	8	6	3635661/3637052/3636877/3641541/3647315/3646953	2	3643298/3644458
BP	GO:0010468	regulation of gene expression	24/241	169/1862	0.340461	0.999718	3641635/3636434/3637920/3637342/3645016/3641244/3636950/3643757/3648000/3642563/3645762/3637706/3636453/3641886/3647713/3640208/3635819/3637727/3643823/3634947/3637862/3636535/3641370/3639303	ZCF18/SFL2/RGT1/ADAEC/CAALFM_C400390WA/GAL4/CUP9/HAL9/ECM22/GZF3/ZCF21/SUT1/GLN3/UGA33/CAALFM_C209460CA/STB5/CAALFM_C202530WA/ZCF22/GCN4/CTA8/ARG83/PPR1/ZCF29/RCA1	24	19	3636434/3637920/3637342/3641244/3636950/3643757/3648000/3642563/3645762/3637706/3636453/3647713/3635819/3637727/3643823/3634947/3637862/3636535/3641370	5	3641635/3645016/3641886/3640208/3639303
BP	GO:0045454	cell redox homeostasis	3/241	16/1862	0.343387	0.999718	3642631/3646660/3641367	TRX2/CAALFM_C107630WA/PDI1	3	1	3642631	2	3646660/3641367
BP	GO:0048193	Golgi vesicle transport	3/241	16/1862	0.343387	0.999718	3642791/3636457/3637401	CAALFM_C406460CA/TIP20/CAALFM_C203800CA	3	3	3642791/3636457/3637401	0
BP	GO:0070647	protein modification by small protein conjugation or removal	3/241	16/1862	0.343387	0.999718	3635164/3639317/3638529	CAALFM_C304970CA/UBP6/CAALFM_C307480WA	3	0		3	3635164/3639317/3638529
BP	GO:0051186	cofactor metabolic process	6/241	37/1862	0.343477	0.999718	3643773/3647071/3639192/3645211/3636812/3641233	ACH1/COX15/CAALFM_C602980CA/HEM15/SNO1/CAALFM_C210860CA	6	3	3643773/3639192/3636812	3	3647071/3645211/3641233
BP	GO:0042592	homeostatic process	4/241	23/1862	0.346631	0.999718	3642631/3646660/3647441/3641367	TRX2/CAALFM_C107630WA/MID1/PDI1	4	2	3642631/3647441	2	3646660/3641367
BP	GO:0008610	lipid biosynthetic process	5/241	31/1862	0.373227	0.999718	3638966/3644557/3635716/3641607/3637849	INO1/CHO1/ERG251/CAALFM_C601370WA/CAALFM_C402420CA	5	2	3644557/3635716	3	3638966/3641607/3637849
BP	GO:0065003	protein-containing complex assembly	4/241	24/1862	0.3779	0.999718	30515358/3642502/3646233/3646043	HHO1/CAALFM_CR05970CA/ISY1/ARC15	4	3	30515358/3646233/3646043	1	3642502
BP	GO:0006497	protein lipidation	2/241	10/1862	0.378352	0.999718	3641607/3637849	CAALFM_C601370WA/CAALFM_C402420CA	2	0		2	3641607/3637849
BP	GO:0006505	GPI anchor metabolic process	2/241	10/1862	0.378352	0.999718	3641607/3637849	CAALFM_C601370WA/CAALFM_C402420CA	2	0		2	3641607/3637849
BP	GO:0006506	GPI anchor biosynthetic process	2/241	10/1862	0.378352	0.999718	3641607/3637849	CAALFM_C601370WA/CAALFM_C402420CA	2	0		2	3641607/3637849
BP	GO:0006661	phosphatidylinositol biosynthetic process	2/241	10/1862	0.378352	0.999718	3641607/3637849	CAALFM_C601370WA/CAALFM_C402420CA	2	0		2	3641607/3637849
BP	GO:0006664	glycolipid metabolic process	2/241	10/1862	0.378352	0.999718	3641607/3637849	CAALFM_C601370WA/CAALFM_C402420CA	2	0		2	3641607/3637849
BP	GO:0009247	glycolipid biosynthetic process	2/241	10/1862	0.378352	0.999718	3641607/3637849	CAALFM_C601370WA/CAALFM_C402420CA	2	0		2	3641607/3637849
BP	GO:0042157	lipoprotein metabolic process	2/241	10/1862	0.378352	0.999718	3641607/3637849	CAALFM_C601370WA/CAALFM_C402420CA	2	0		2	3641607/3637849
BP	GO:0042158	lipoprotein biosynthetic process	2/241	10/1862	0.378352	0.999718	3641607/3637849	CAALFM_C601370WA/CAALFM_C402420CA	2	0		2	3641607/3637849
BP	GO:0046467	membrane lipid biosynthetic process	2/241	10/1862	0.378352	0.999718	3641607/3637849	CAALFM_C601370WA/CAALFM_C402420CA	2	0		2	3641607/3637849
BP	GO:1903509	liposaccharide metabolic process	2/241	10/1862	0.378352	0.999718	3641607/3637849	CAALFM_C601370WA/CAALFM_C402420CA	2	0		2	3641607/3637849
BP	GO:0006508	proteolysis	11/241	76/1862	0.394037	0.999718	3643295/3638884/3646074/3636589/3635164/3640999/3639558/3639317/3645874/3642244/3645040	DDI1/CAALFM_C200700WA/CAALFM_C600340CA/AFG3/CAALFM_C304970CA/PIM1/CAALFM_C106390WA/UBP6/CAALFM_C602300CA/CYM1/STE24	11	0		11	3643295/3638884/3646074/3636589/3635164/3640999/3639558/3639317/3645874/3642244/3645040
BP	GO:0031323	regulation of cellular metabolic process	24/241	175/1862	0.411492	0.999718	3641635/3636434/3637920/3637342/3645016/3641244/3636950/3643757/3648000/3642563/3645762/3637706/3636453/3641886/3647713/3640208/3635819/3637727/3643823/3634947/3637862/3636535/3641370/3639303	ZCF18/SFL2/RGT1/ADAEC/CAALFM_C400390WA/GAL4/CUP9/HAL9/ECM22/GZF3/ZCF21/SUT1/GLN3/UGA33/CAALFM_C209460CA/STB5/CAALFM_C202530WA/ZCF22/GCN4/CTA8/ARG83/PPR1/ZCF29/RCA1	24	19	3636434/3637920/3637342/3641244/3636950/3643757/3648000/3642563/3645762/3637706/3636453/3647713/3635819/3637727/3643823/3634947/3637862/3636535/3641370	5	3641635/3645016/3641886/3640208/3639303
BP	GO:0006811	ion transport	11/241	77/1862	0.411741	0.999718	3634826/3639546/3639861/3645976/3647441/3648427/3644476/3636553/3635752/3636616/3647141	CRP1/HAK1/PHO87/CAALFM_C604550CA/MID1/CTR2/CCS1/MEP1/CAALFM_C202180WA/ALR1/NHX1	11	8	3634826/3639546/3639861/3647441/3648427/3636553/3635752/3636616	3	3645976/3644476/3647141
BP	GO:0051171	regulation of nitrogen compound metabolic process	24/241	176/1862	0.423532	0.999718	3641635/3636434/3637920/3637342/3645016/3641244/3636950/3643757/3648000/3642563/3645762/3637706/3636453/3641886/3647713/3640208/3635819/3637727/3643823/3634947/3637862/3636535/3641370/3639303	ZCF18/SFL2/RGT1/ADAEC/CAALFM_C400390WA/GAL4/CUP9/HAL9/ECM22/GZF3/ZCF21/SUT1/GLN3/UGA33/CAALFM_C209460CA/STB5/CAALFM_C202530WA/ZCF22/GCN4/CTA8/ARG83/PPR1/ZCF29/RCA1	24	19	3636434/3637920/3637342/3641244/3636950/3643757/3648000/3642563/3645762/3637706/3636453/3647713/3635819/3637727/3643823/3634947/3637862/3636535/3641370	5	3641635/3645016/3641886/3640208/3639303
BP	GO:0080090	regulation of primary metabolic process	24/241	176/1862	0.423532	0.999718	3641635/3636434/3637920/3637342/3645016/3641244/3636950/3643757/3648000/3642563/3645762/3637706/3636453/3641886/3647713/3640208/3635819/3637727/3643823/3634947/3637862/3636535/3641370/3639303	ZCF18/SFL2/RGT1/ADAEC/CAALFM_C400390WA/GAL4/CUP9/HAL9/ECM22/GZF3/ZCF21/SUT1/GLN3/UGA33/CAALFM_C209460CA/STB5/CAALFM_C202530WA/ZCF22/GCN4/CTA8/ARG83/PPR1/ZCF29/RCA1	24	19	3636434/3637920/3637342/3641244/3636950/3643757/3648000/3642563/3645762/3637706/3636453/3647713/3635819/3637727/3643823/3634947/3637862/3636535/3641370	5	3641635/3645016/3641886/3640208/3639303
BP	GO:0006643	membrane lipid metabolic process	2/241	11/1862	0.426624	0.999718	3641607/3637849	CAALFM_C601370WA/CAALFM_C402420CA	2	0		2	3641607/3637849
BP	GO:0033043	regulation of organelle organization	2/241	11/1862	0.426624	0.999718	3646043/3645874	ARC15/CAALFM_C602300CA	2	1	3646043	1	3645874
BP	GO:0045017	glycerolipid biosynthetic process	2/241	11/1862	0.426624	0.999718	3641607/3637849	CAALFM_C601370WA/CAALFM_C402420CA	2	0		2	3641607/3637849
BP	GO:0046474	glycerophospholipid biosynthetic process	2/241	11/1862	0.426624	0.999718	3641607/3637849	CAALFM_C601370WA/CAALFM_C402420CA	2	0		2	3641607/3637849
BP	GO:0009056	catabolic process	11/241	78/1862	0.429465	0.999718	3634797/3645987/3634854/3635164/3639558/3637713/3645874/3643924/3644561/3644562/3635724	LIP3/LIP4/LIP2/CAALFM_C304970CA/CAALFM_C106390WA/PDE1/CAALFM_C602300CA/GPD1/PLB1/PLB2/PLB4.5	11	6	3634797/3634854/3637713/3643924/3644561/3635724	5	3645987/3635164/3639558/3645874/3644562
BP	GO:0019222	regulation of metabolic process	24/241	179/1862	0.45977	0.999718	3641635/3636434/3637920/3637342/3645016/3641244/3636950/3643757/3648000/3642563/3645762/3637706/3636453/3641886/3647713/3640208/3635819/3637727/3643823/3634947/3637862/3636535/3641370/3639303	ZCF18/SFL2/RGT1/ADAEC/CAALFM_C400390WA/GAL4/CUP9/HAL9/ECM22/GZF3/ZCF21/SUT1/GLN3/UGA33/CAALFM_C209460CA/STB5/CAALFM_C202530WA/ZCF22/GCN4/CTA8/ARG83/PPR1/ZCF29/RCA1	24	19	3636434/3637920/3637342/3641244/3636950/3643757/3648000/3642563/3645762/3637706/3636453/3647713/3635819/3637727/3643823/3634947/3637862/3636535/3641370	5	3641635/3645016/3641886/3640208/3639303
BP	GO:0060255	regulation of macromolecule metabolic process	24/241	179/1862	0.45977	0.999718	3641635/3636434/3637920/3637342/3645016/3641244/3636950/3643757/3648000/3642563/3645762/3637706/3636453/3641886/3647713/3640208/3635819/3637727/3643823/3634947/3637862/3636535/3641370/3639303	ZCF18/SFL2/RGT1/ADAEC/CAALFM_C400390WA/GAL4/CUP9/HAL9/ECM22/GZF3/ZCF21/SUT1/GLN3/UGA33/CAALFM_C209460CA/STB5/CAALFM_C202530WA/ZCF22/GCN4/CTA8/ARG83/PPR1/ZCF29/RCA1	24	19	3636434/3637920/3637342/3641244/3636950/3643757/3648000/3642563/3645762/3637706/3636453/3647713/3635819/3637727/3643823/3634947/3637862/3636535/3641370	5	3641635/3645016/3641886/3640208/3639303
BP	GO:0005975	carbohydrate metabolic process	11/241	80/1862	0.464835	0.999718	3642618/3638966/3638967/3637905/3636421/3644591/3644583/3636837/3636797/3634895/3643924	CAALFM_C501230CA/INO1/CHT3/CRH11/CAALFM_C504940WA/GAL7/GAL10/XOG1/SCW4/DAK2/GPD1	11	9	3642618/3638967/3637905/3636421/3644591/3644583/3636837/3636797/3643924	2	3638966/3634895
BP	GO:0051128	regulation of cellular component organization	2/241	12/1862	0.472866	0.999718	3646043/3645874	ARC15/CAALFM_C602300CA	2	1	3646043	1	3645874
BP	GO:1901564	organonitrogen compound metabolic process	64/241	490/1862	0.491396	0.999718	3644012/3637784/3644836/3634866/3640275/3642097/3643295/3647071/3640285/3641893/3644116/3637799/3636649/3638884/3646074/3647858/3645956/3636589/3639192/3635164/3639233/3647730/3644580/3640999/3643431/3647801/3639339/3636824/3636228/3641607/3647777/3646075/3639321/3636455/3638382/3648101/3639558/3637849/3636912/3643940/3637713/3646386/3639317/3645124/3636585/3645874/3636636/3639281/3646086/3642244…	ILV5/MNN1/CAALFM_CR06040WA/SWE1/NAM2/HSP104/DDI1/COX15/ALA1/CHS2/SPE2/CAALFM_C503150WA/URA3/CAALFM_C200700WA/CAALFM_C600340CA/PTP2/ILS1/AFG3/CAALFM_C602980CA/CAALFM_C304970CA/QCR7/SUI1/SHA3/PIM1/RXT3/YAK1/LEU4/FRS2/KNS1/CAALFM_C601370WA/HIS3/PKH3/TRP1/CAALFM_C504290CA/MET13/DBF2/CAALFM_C106390WA/CAALFM_C402420CA/CAALFM_C103470CA/HEM3/PDE1/GLN1/UBP6/CAALFM_CR03110WA/MNT1/CAALFM_C602300CA/CAALFM_C3…	64	26	3637784/3644836/3634866/3642097/3641893/3644116/3637799/3636649/3647858/3639192/3647730/3644580/3643431/3647801/3636824/3636228/3636455/3648101/3636912/3643940/3637713/3646386/3639281/3636812/3634904/3643482	38	3644012/3640275/3643295/3647071/3640285/3638884/3646074/3645956/3636589/3635164/3639233/3640999/3639339/3641607/3647777/3646075/3639321/3638382/3639558/3637849/3639317/3645124/3636585/3645874/3636636/3646086/3642244/3645211/3642478/3641195/3635826/3638529/3639723/3641233/3645426/3645040/3639498/3645025
BP	GO:0044262	cellular carbohydrate metabolic process	2/241	13/1862	0.516795	0.999718	3638966/3634895	INO1/DAK2	2	0		2	3638966/3634895
BP	GO:0090407	organophosphate biosynthetic process	7/241	52/1862	0.518635	0.999718	3643784/3638966/3644557/3639192/3641607/3637849/3636812	IPK2/INO1/CHO1/CAALFM_C602980CA/CAALFM_C601370WA/CAALFM_C402420CA/SNO1	7	4	3643784/3644557/3639192/3636812	3	3638966/3641607/3637849
BP	GO:0006468	protein phosphorylation	13/241	99/1862	0.52483	0.999718	3644836/3634866/3637799/3644580/3647801/3636228/3646075/3648101/3636912/3636636/3639281/3639498/3643482	CAALFM_CR06040WA/SWE1/CAALFM_C503150WA/SHA3/YAK1/KNS1/PKH3/DBF2/CAALFM_C103470CA/CAALFM_C302260CA/CDC5/NPR1/TPK2	13	10	3644836/3634866/3637799/3644580/3647801/3636228/3648101/3636912/3639281/3643482	3	3646075/3636636/3639498
BP	GO:0016310	phosphorylation	14/241	107/1862	0.528276	0.999718	3644836/3634866/3637799/3639233/3644580/3647801/3636228/3646075/3648101/3636912/3636636/3639281/3639498/3643482	CAALFM_CR06040WA/SWE1/CAALFM_C503150WA/QCR7/SHA3/YAK1/KNS1/PKH3/DBF2/CAALFM_C103470CA/CAALFM_C302260CA/CDC5/NPR1/TPK2	14	10	3644836/3634866/3637799/3644580/3647801/3636228/3648101/3636912/3639281/3643482	4	3639233/3646075/3636636/3639498
BP	GO:0018130	heterocycle biosynthetic process	36/241	279/1862	0.540449	0.999718	3641635/3636434/3637920/3647071/3637342/3636649/3645016/3641244/3636950/3643757/3639192/3648000/3642563/3647777/3645762/3637706/3643940/3637713/3636453/3641886/3647713/3640208/3635819/3637727/3643823/3634947/3645211/3636812/3637862/3638991/3636535/3647693/3641370/3641233/3639303/3645025	ZCF18/SFL2/RGT1/COX15/ADAEC/URA3/CAALFM_C400390WA/GAL4/CUP9/HAL9/CAALFM_C602980CA/ECM22/GZF3/HIS3/ZCF21/SUT1/HEM3/PDE1/GLN3/UGA33/CAALFM_C209460CA/STB5/CAALFM_C202530WA/ZCF22/GCN4/CTA8/HEM15/SNO1/ARG83/RPO21/PPR1/RPC19/ZCF29/CAALFM_C210860CA/RCA1/HIS4	36	25	3636434/3637920/3637342/3636649/3641244/3636950/3643757/3639192/3648000/3642563/3645762/3637706/3643940/3637713/3636453/3647713/3635819/3637727/3643823/3634947/3636812/3637862/3636535/3647693/3641370	11	3641635/3647071/3645016/3647777/3641886/3640208/3645211/3638991/3641233/3639303/3645025
BP	GO:0006399	tRNA metabolic process	8/241	61/1862	0.543102	0.999718	3640275/3640285/3643778/3645956/3647604/3636824/3645124/3646086	NAM2/ALA1/SMM1/ILS1/CAALFM_C112570CA/FRS2/CAALFM_CR03110WA/CAALFM_C600390WA	8	3	3643778/3647604/3636824	5	3640275/3640285/3645956/3645124/3646086
BP	GO:0006511	ubiquitin-dependent protein catabolic process	3/241	22/1862	0.556725	0.999718	3635164/3639558/3645874	CAALFM_C304970CA/CAALFM_C106390WA/CAALFM_C602300CA	3	0		3	3635164/3639558/3645874
BP	GO:0019941	modification-dependent protein catabolic process	3/241	22/1862	0.556725	0.999718	3635164/3639558/3645874	CAALFM_C304970CA/CAALFM_C106390WA/CAALFM_C602300CA	3	0		3	3635164/3639558/3645874
BP	GO:0043632	modification-dependent macromolecule catabolic process	3/241	22/1862	0.556725	0.999718	3635164/3639558/3645874	CAALFM_C304970CA/CAALFM_C106390WA/CAALFM_C602300CA	3	0		3	3635164/3639558/3645874
BP	GO:0022607	cellular component assembly	4/241	30/1862	0.557009	0.999718	30515358/3642502/3646233/3646043	HHO1/CAALFM_CR05970CA/ISY1/ARC15	4	3	30515358/3646233/3646043	1	3642502
BP	GO:0046488	phosphatidylinositol metabolic process	2/241	14/1862	0.558234	0.999718	3641607/3637849	CAALFM_C601370WA/CAALFM_C402420CA	2	0		2	3641607/3637849
BP	GO:0098813	nuclear chromosome segregation	2/241	14/1862	0.558234	0.999718	3635656/3645874	ASK1/CAALFM_C602300CA	2	1	3635656	1	3645874
BP	GO:0006418	tRNA aminoacylation for protein translation	4/241	31/1862	0.584236	0.999718	3640275/3640285/3645956/3646086	NAM2/ALA1/ILS1/CAALFM_C600390WA	4	0		4	3640275/3640285/3645956/3646086
BP	GO:0035556	intracellular signal transduction	4/241	31/1862	0.584236	0.999718	3643298/3647315/3646953/3644458	GDI1/BUD5/TSC2/YPD1	4	2	3647315/3646953	2	3643298/3644458
BP	GO:0006650	glycerophospholipid metabolic process	2/241	15/1862	0.597089	0.999718	3641607/3637849	CAALFM_C601370WA/CAALFM_C402420CA	2	0		2	3641607/3637849
BP	GO:0022402	cell cycle process	2/241	15/1862	0.597089	0.999718	3635656/3645874	ASK1/CAALFM_C602300CA	2	1	3635656	1	3645874
BP	GO:0046486	glycerolipid metabolic process	2/241	15/1862	0.597089	0.999718	3641607/3637849	CAALFM_C601370WA/CAALFM_C402420CA	2	0		2	3641607/3637849
BP	GO:0019438	aromatic compound biosynthetic process	35/241	277/1862	0.597327	0.999718	3641635/3636434/3637920/3647071/3637342/3645016/3641244/3636950/3643757/3639192/3648000/3642563/3647777/3645762/3637706/3643940/3637713/3636453/3641886/3647713/3640208/3635819/3637727/3643823/3634947/3645211/3636812/3637862/3638991/3636535/3647693/3641370/3641233/3639303/3645025	ZCF18/SFL2/RGT1/COX15/ADAEC/CAALFM_C400390WA/GAL4/CUP9/HAL9/CAALFM_C602980CA/ECM22/GZF3/HIS3/ZCF21/SUT1/HEM3/PDE1/GLN3/UGA33/CAALFM_C209460CA/STB5/CAALFM_C202530WA/ZCF22/GCN4/CTA8/HEM15/SNO1/ARG83/RPO21/PPR1/RPC19/ZCF29/CAALFM_C210860CA/RCA1/HIS4	35	24	3636434/3637920/3637342/3641244/3636950/3643757/3639192/3648000/3642563/3645762/3637706/3643940/3637713/3636453/3647713/3635819/3637727/3643823/3634947/3636812/3637862/3636535/3647693/3641370	11	3641635/3647071/3645016/3647777/3641886/3640208/3645211/3638991/3641233/3639303/3645025
BP	GO:1901362	organic cyclic compound biosynthetic process	36/241	285/1862	0.598934	0.999718	3641635/3636434/3637920/3647071/3637342/3636649/3645016/3641244/3636950/3643757/3639192/3648000/3642563/3647777/3645762/3637706/3643940/3637713/3636453/3641886/3647713/3640208/3635819/3637727/3643823/3634947/3645211/3636812/3637862/3638991/3636535/3647693/3641370/3641233/3639303/3645025	ZCF18/SFL2/RGT1/COX15/ADAEC/URA3/CAALFM_C400390WA/GAL4/CUP9/HAL9/CAALFM_C602980CA/ECM22/GZF3/HIS3/ZCF21/SUT1/HEM3/PDE1/GLN3/UGA33/CAALFM_C209460CA/STB5/CAALFM_C202530WA/ZCF22/GCN4/CTA8/HEM15/SNO1/ARG83/RPO21/PPR1/RPC19/ZCF29/CAALFM_C210860CA/RCA1/HIS4	36	25	3636434/3637920/3637342/3636649/3641244/3636950/3643757/3639192/3648000/3642563/3645762/3637706/3643940/3637713/3636453/3647713/3635819/3637727/3643823/3634947/3636812/3637862/3636535/3647693/3641370	11	3641635/3647071/3645016/3647777/3641886/3640208/3645211/3638991/3641233/3639303/3645025
BP	GO:1901135	carbohydrate derivative metabolic process	10/241	80/1862	0.60044	0.999718	3637784/3641893/3639192/3639233/3641607/3637849/3637713/3636585/3643924/3634904	MNN1/CHS2/CAALFM_C602980CA/QCR7/CAALFM_C601370WA/CAALFM_C402420CA/PDE1/MNT1/GPD1/MNN12	10	6	3637784/3641893/3639192/3637713/3643924/3634904	4	3639233/3641607/3637849/3636585
BP	GO:0009150	purine ribonucleotide metabolic process	3/241	24/1862	0.618288	0.999718	3639192/3639233/3637713	CAALFM_C602980CA/QCR7/PDE1	3	2	3639192/3637713	1	3639233
BP	GO:0009259	ribonucleotide metabolic process	3/241	24/1862	0.618288	0.999718	3639192/3639233/3637713	CAALFM_C602980CA/QCR7/PDE1	3	2	3639192/3637713	1	3639233
BP	GO:0050896	response to stimulus	14/241	114/1862	0.630598	0.999718	3637342/3635661/3644010/3637052/3642966/3641632/3643106/3643298/3636877/3641541/3647315/3646953/3644127/3644458	ADAEC/RGA2/CAALFM_C600850WA/IQG1/CAALFM_C407010CA/FPG1/OGG1/GDI1/PDE2/BUD2/BUD5/TSC2/CAALFM_C500810CA/YPD1	14	8	3637342/3635661/3637052/3636877/3641541/3647315/3646953/3644127	6	3644010/3642966/3641632/3643106/3643298/3644458
BP	GO:0007059	chromosome segregation	2/241	16/1862	0.633332	0.999718	3635656/3645874	ASK1/CAALFM_C602300CA	2	1	3635656	1	3645874
BP	GO:0006732	coenzyme metabolic process	3/241	25/1862	0.646823	0.999718	3643773/3639192/3636812	ACH1/CAALFM_C602980CA/SNO1	3	3	3643773/3639192/3636812	0
BP	GO:0006163	purine nucleotide metabolic process	3/241	26/1862	0.673822	0.999718	3639192/3639233/3637713	CAALFM_C602980CA/QCR7/PDE1	3	2	3639192/3637713	1	3639233
BP	GO:0019693	ribose phosphate metabolic process	3/241	26/1862	0.673822	0.999718	3639192/3639233/3637713	CAALFM_C602980CA/QCR7/PDE1	3	2	3639192/3637713	1	3639233
BP	GO:0006464	cellular protein modification process	23/241	190/1862	0.676991	0.999718	3637784/3644836/3634866/3637799/3647858/3635164/3644580/3643431/3647801/3636228/3641607/3646075/3648101/3637849/3636912/3639317/3636585/3636636/3639281/3638529/3634904/3639498/3643482	MNN1/CAALFM_CR06040WA/SWE1/CAALFM_C503150WA/PTP2/CAALFM_C304970CA/SHA3/RXT3/YAK1/KNS1/CAALFM_C601370WA/PKH3/DBF2/CAALFM_C402420CA/CAALFM_C103470CA/UBP6/MNT1/CAALFM_C302260CA/CDC5/CAALFM_C307480WA/MNN12/NPR1/TPK2	23	14	3637784/3644836/3634866/3637799/3647858/3644580/3643431/3647801/3636228/3648101/3636912/3639281/3634904/3643482	9	3635164/3641607/3646075/3637849/3639317/3636585/3636636/3638529/3639498
BP	GO:0036211	protein modification process	23/241	190/1862	0.676991	0.999718	3637784/3644836/3634866/3637799/3647858/3635164/3644580/3643431/3647801/3636228/3641607/3646075/3648101/3637849/3636912/3639317/3636585/3636636/3639281/3638529/3634904/3639498/3643482	MNN1/CAALFM_CR06040WA/SWE1/CAALFM_C503150WA/PTP2/CAALFM_C304970CA/SHA3/RXT3/YAK1/KNS1/CAALFM_C601370WA/PKH3/DBF2/CAALFM_C402420CA/CAALFM_C103470CA/UBP6/MNT1/CAALFM_C302260CA/CDC5/CAALFM_C307480WA/MNN12/NPR1/TPK2	23	14	3637784/3644836/3634866/3637799/3647858/3644580/3643431/3647801/3636228/3648101/3636912/3639281/3634904/3643482	9	3635164/3641607/3646075/3637849/3639317/3636585/3636636/3638529/3639498
BP	GO:1901566	organonitrogen compound biosynthetic process	29/241	239/1862	0.68717	0.999718	3644012/3637784/3640275/3647071/3640285/3641893/3644116/3636649/3645956/3639192/3647730/3639339/3641607/3647777/3636455/3637849/3643940/3646386/3636585/3646086/3645211/3642478/3636812/3635826/3634904/3639723/3641233/3645426/3645025	ILV5/MNN1/NAM2/COX15/ALA1/CHS2/SPE2/URA3/ILS1/CAALFM_C602980CA/SUI1/LEU4/CAALFM_C601370WA/HIS3/CAALFM_C504290CA/CAALFM_C402420CA/HEM3/GLN1/MNT1/CAALFM_C600390WA/HEM15/CAALFM_C105400CA/SNO1/HOM2/MNN12/CAALFM_CR00490WA/CAALFM_C210860CA/CAALFM_C101900CA/HIS4	29	11	3637784/3641893/3644116/3636649/3639192/3647730/3636455/3643940/3646386/3636812/3634904	18	3644012/3640275/3647071/3640285/3645956/3639339/3641607/3647777/3637849/3636585/3646086/3645211/3642478/3635826/3639723/3641233/3645426/3645025
BP	GO:0051716	cellular response to stimulus	12/241	103/1862	0.701638	0.999718	3637342/3635661/3637052/3642966/3641632/3643106/3643298/3636877/3641541/3647315/3646953/3644458	ADAEC/RGA2/IQG1/CAALFM_C407010CA/FPG1/OGG1/GDI1/PDE2/BUD2/BUD5/TSC2/YPD1	12	7	3637342/3635661/3637052/3636877/3641541/3647315/3646953	5	3642966/3641632/3643106/3643298/3644458
BP	GO:0017144	drug metabolic process	4/241	36/1862	0.704788	0.999718	3641893/3644116/3639233/3636812	CHS2/SPE2/QCR7/SNO1	4	3	3641893/3644116/3636812	1	3639233
BP	GO:1901137	carbohydrate derivative biosynthetic process	7/241	62/1862	0.710856	0.999718	3637784/3641893/3639192/3641607/3637849/3636585/3634904	MNN1/CHS2/CAALFM_C602980CA/CAALFM_C601370WA/CAALFM_C402420CA/MNT1/MNN12	7	4	3637784/3641893/3639192/3634904	3	3641607/3637849/3636585
BP	GO:0006351	transcription, DNA-templated	26/241	218/1862	0.715463	0.999718	3641635/3636434/3637920/3637342/3645016/3641244/3636950/3643757/3648000/3642563/3645762/3637706/3636453/3641886/3647713/3640208/3635819/3637727/3643823/3634947/3637862/3638991/3636535/3647693/3641370/3639303	ZCF18/SFL2/RGT1/ADAEC/CAALFM_C400390WA/GAL4/CUP9/HAL9/ECM22/GZF3/ZCF21/SUT1/GLN3/UGA33/CAALFM_C209460CA/STB5/CAALFM_C202530WA/ZCF22/GCN4/CTA8/ARG83/RPO21/PPR1/RPC19/ZCF29/RCA1	26	20	3636434/3637920/3637342/3641244/3636950/3643757/3648000/3642563/3645762/3637706/3636453/3647713/3635819/3637727/3643823/3634947/3637862/3636535/3647693/3641370	6	3641635/3645016/3641886/3640208/3638991/3639303
BP	GO:0097659	nucleic acid-templated transcription	26/241	218/1862	0.715463	0.999718	3641635/3636434/3637920/3637342/3645016/3641244/3636950/3643757/3648000/3642563/3645762/3637706/3636453/3641886/3647713/3640208/3635819/3637727/3643823/3634947/3637862/3638991/3636535/3647693/3641370/3639303	ZCF18/SFL2/RGT1/ADAEC/CAALFM_C400390WA/GAL4/CUP9/HAL9/ECM22/GZF3/ZCF21/SUT1/GLN3/UGA33/CAALFM_C209460CA/STB5/CAALFM_C202530WA/ZCF22/GCN4/CTA8/ARG83/RPO21/PPR1/RPC19/ZCF29/RCA1	26	20	3636434/3637920/3637342/3641244/3636950/3643757/3648000/3642563/3645762/3637706/3636453/3647713/3635819/3637727/3643823/3634947/3637862/3636535/3647693/3641370	6	3641635/3645016/3641886/3640208/3638991/3639303
BP	GO:0072521	purine-containing compound metabolic process	3/241	28/1862	0.723206	0.999718	3639192/3639233/3637713	CAALFM_C602980CA/QCR7/PDE1	3	2	3639192/3637713	1	3639233
BP	GO:1901565	organonitrogen compound catabolic process	4/241	37/1862	0.725606	0.999718	3635164/3639558/3637713/3645874	CAALFM_C304970CA/CAALFM_C106390WA/PDE1/CAALFM_C602300CA	4	1	3637713	3	3635164/3639558/3645874
BP	GO:0032774	RNA biosynthetic process	26/241	220/1862	0.73366	0.999718	3641635/3636434/3637920/3637342/3645016/3641244/3636950/3643757/3648000/3642563/3645762/3637706/3636453/3641886/3647713/3640208/3635819/3637727/3643823/3634947/3637862/3638991/3636535/3647693/3641370/3639303	ZCF18/SFL2/RGT1/ADAEC/CAALFM_C400390WA/GAL4/CUP9/HAL9/ECM22/GZF3/ZCF21/SUT1/GLN3/UGA33/CAALFM_C209460CA/STB5/CAALFM_C202530WA/ZCF22/GCN4/CTA8/ARG83/RPO21/PPR1/RPC19/ZCF29/RCA1	26	20	3636434/3637920/3637342/3641244/3636950/3643757/3648000/3642563/3645762/3637706/3636453/3647713/3635819/3637727/3643823/3634947/3637862/3636535/3647693/3641370	6	3641635/3645016/3641886/3640208/3638991/3639303
BP	GO:0006486	protein glycosylation	3/241	29/1862	0.74563	0.999718	3637784/3636585/3634904	MNN1/MNT1/MNN12	3	2	3637784/3634904	1	3636585
BP	GO:0009100	glycoprotein metabolic process	3/241	29/1862	0.74563	0.999718	3637784/3636585/3634904	MNN1/MNT1/MNN12	3	2	3637784/3634904	1	3636585
BP	GO:0009101	glycoprotein biosynthetic process	3/241	29/1862	0.74563	0.999718	3637784/3636585/3634904	MNN1/MNT1/MNN12	3	2	3637784/3634904	1	3636585
BP	GO:0043413	macromolecule glycosylation	3/241	29/1862	0.74563	0.999718	3637784/3636585/3634904	MNN1/MNT1/MNN12	3	2	3637784/3634904	1	3636585
BP	GO:0044257	cellular protein catabolic process	3/241	29/1862	0.74563	0.999718	3635164/3639558/3645874	CAALFM_C304970CA/CAALFM_C106390WA/CAALFM_C602300CA	3	0		3	3635164/3639558/3645874
BP	GO:0051603	proteolysis involved in cellular protein catabolic process	3/241	29/1862	0.74563	0.999718	3635164/3639558/3645874	CAALFM_C304970CA/CAALFM_C106390WA/CAALFM_C602300CA	3	0		3	3635164/3639558/3645874
BP	GO:0006820	anion transport	1/241	10/1862	0.750846	0.999718	3645976	CAALFM_C604550CA	1	0		1	3645976
BP	GO:0009966	regulation of signal transduction	1/241	10/1862	0.750846	0.999718	3646953	TSC2	1	1	3646953	0
BP	GO:0010646	regulation of cell communication	1/241	10/1862	0.750846	0.999718	3646953	TSC2	1	1	3646953	0
BP	GO:0023051	regulation of signaling	1/241	10/1862	0.750846	0.999718	3646953	TSC2	1	1	3646953	0
BP	GO:0034404	nucleobase-containing small molecule biosynthetic process	1/241	10/1862	0.750846	0.999718	3637713	PDE1	1	1	3637713	0
BP	GO:0048285	organelle fission	1/241	10/1862	0.750846	0.999718	3645874	CAALFM_C602300CA	1	0		1	3645874
BP	GO:0048583	regulation of response to stimulus	1/241	10/1862	0.750846	0.999718	3646953	TSC2	1	1	3646953	0
BP	GO:0072525	pyridine-containing compound biosynthetic process	1/241	10/1862	0.750846	0.999718	3636812	SNO1	1	1	3636812	0
BP	GO:1903047	mitotic cell cycle process	1/241	10/1862	0.750846	0.999718	3645874	CAALFM_C602300CA	1	0		1	3645874
BP	GO:0044248	cellular catabolic process	7/241	65/1862	0.757321	0.999718	3635164/3639558/3637713/3645874/3644561/3644562/3635724	CAALFM_C304970CA/CAALFM_C106390WA/PDE1/CAALFM_C602300CA/PLB1/PLB2/PLB4.5	7	3	3637713/3644561/3635724	4	3635164/3639558/3645874/3644562
BP	GO:0030163	protein catabolic process	3/241	30/1862	0.766588	0.999718	3635164/3639558/3645874	CAALFM_C304970CA/CAALFM_C106390WA/CAALFM_C602300CA	3	0		3	3635164/3639558/3645874
BP	GO:0070085	glycosylation	3/241	30/1862	0.766588	0.999718	3637784/3636585/3634904	MNN1/MNT1/MNN12	3	2	3637784/3634904	1	3636585
BP	GO:0016192	vesicle-mediated transport	7/241	66/1862	0.771567	0.999718	3645870/3642791/3638440/3636457/3644442/3637401/3636511	SEC27/CAALFM_C406460CA/CAALFM_C307130WA/TIP20/SFT2/CAALFM_C203800CA/CAALFM_C504580CA	7	4	3642791/3636457/3637401/3636511	3	3645870/3638440/3644442
BP	GO:0009108	coenzyme biosynthetic process	2/241	21/1862	0.777288	0.999718	3639192/3636812	CAALFM_C602980CA/SNO1	2	2	3639192/3636812	0
BP	GO:0007010	cytoskeleton organization	1/241	11/1862	0.783269	0.999718	3646043	ARC15	1	1	3646043	0
BP	GO:0016051	carbohydrate biosynthetic process	1/241	11/1862	0.783269	0.999718	3638966	INO1	1	0		1	3638966
BP	GO:0051726	regulation of cell cycle	1/241	11/1862	0.783269	0.999718	3645874	CAALFM_C602300CA	1	0		1	3645874
BP	GO:0098655	cation transmembrane transport	3/241	31/1862	0.786126	0.999718	3639546/3647441/3648427	HAK1/MID1/CTR2	3	3	3639546/3647441/3648427	0
BP	GO:0098660	inorganic ion transmembrane transport	3/241	31/1862	0.786126	0.999718	3639546/3647441/3648427	HAK1/MID1/CTR2	3	3	3639546/3647441/3648427	0
BP	GO:0098662	inorganic cation transmembrane transport	3/241	31/1862	0.786126	0.999718	3639546/3647441/3648427	HAK1/MID1/CTR2	3	3	3639546/3647441/3648427	0
BP	GO:0034660	ncRNA metabolic process	8/241	76/1862	0.788713	0.999718	3640275/3640285/3643778/3645956/3647604/3636824/3645124/3646086	NAM2/ALA1/SMM1/ILS1/CAALFM_C112570CA/FRS2/CAALFM_CR03110WA/CAALFM_C600390WA	8	3	3643778/3647604/3636824	5	3640275/3640285/3645956/3645124/3646086
BP	GO:0043412	macromolecule modification	24/241	211/1862	0.794837	0.999718	3637784/3644836/3634866/3637799/3647858/3635164/3647604/3644580/3643431/3647801/3636228/3641607/3646075/3648101/3637849/3636912/3639317/3636585/3636636/3639281/3638529/3634904/3639498/3643482	MNN1/CAALFM_CR06040WA/SWE1/CAALFM_C503150WA/PTP2/CAALFM_C304970CA/CAALFM_C112570CA/SHA3/RXT3/YAK1/KNS1/CAALFM_C601370WA/PKH3/DBF2/CAALFM_C402420CA/CAALFM_C103470CA/UBP6/MNT1/CAALFM_C302260CA/CDC5/CAALFM_C307480WA/MNN12/NPR1/TPK2	24	15	3637784/3644836/3634866/3637799/3647858/3647604/3644580/3643431/3647801/3636228/3648101/3636912/3639281/3634904/3643482	9	3635164/3641607/3646075/3637849/3639317/3636585/3636636/3638529/3639498
BP	GO:0006950	response to stress	6/241	60/1862	0.809698	0.999718	3637342/3644010/3642966/3641632/3643106/3644127	ADAEC/CAALFM_C600850WA/CAALFM_C407010CA/FPG1/OGG1/CAALFM_C500810CA	6	2	3637342/3644127	4	3644010/3642966/3641632/3643106
BP	GO:0016569	covalent chromatin modification	1/241	12/1862	0.811487	0.999718	3643431	RXT3	1	1	3643431	0
BP	GO:0016570	histone modification	1/241	12/1862	0.811487	0.999718	3643431	RXT3	1	1	3643431	0
BP	GO:0072524	pyridine-containing compound metabolic process	1/241	12/1862	0.811487	0.999718	3636812	SNO1	1	1	3636812	0
BP	GO:0006325	chromatin organization	2/241	23/1862	0.81945	0.999718	30515358/3643431	HHO1/RXT3	2	2	30515358/3643431	0
BP	GO:0000278	mitotic cell cycle	1/241	13/1862	0.836045	0.999718	3645874	CAALFM_C602300CA	1	0		1	3645874
BP	GO:0006091	generation of precursor metabolites and energy	1/241	13/1862	0.836045	0.999718	3639233	QCR7	1	0		1	3639233
BP	GO:0007005	mitochondrion organization	1/241	13/1862	0.836045	0.999718	3642502	CAALFM_CR05970CA	1	0		1	3642502
BP	GO:0016311	dephosphorylation	1/241	13/1862	0.836045	0.999718	3647858	PTP2	1	1	3647858	0
BP	GO:0016579	protein deubiquitination	1/241	13/1862	0.836045	0.999718	3639317	UBP6	1	0		1	3639317
BP	GO:0034655	nucleobase-containing compound catabolic process	1/241	13/1862	0.836045	0.999718	3637713	PDE1	1	1	3637713	0
BP	GO:0070646	protein modification by small protein removal	1/241	13/1862	0.836045	0.999718	3639317	UBP6	1	0		1	3639317
BP	GO:0034220	ion transmembrane transport	3/241	34/1862	0.836771	0.999718	3639546/3647441/3648427	HAK1/MID1/CTR2	3	3	3639546/3647441/3648427	0
BP	GO:0044265	cellular macromolecule catabolic process	3/241	34/1862	0.836771	0.999718	3635164/3639558/3645874	CAALFM_C304970CA/CAALFM_C106390WA/CAALFM_C602300CA	3	0		3	3635164/3639558/3645874
BP	GO:0009057	macromolecule catabolic process	3/241	35/1862	0.8512	0.999718	3635164/3639558/3645874	CAALFM_C304970CA/CAALFM_C106390WA/CAALFM_C602300CA	3	0		3	3635164/3639558/3645874
BP	GO:0006281	DNA repair	4/241	45/1862	0.854226	0.999718	3637342/3642966/3641632/3643106	ADAEC/CAALFM_C407010CA/FPG1/OGG1	4	1	3637342	3	3642966/3641632/3643106
BP	GO:0034654	nucleobase-containing compound biosynthetic process	28/241	255/1862	0.866564	0.999718	3641635/3636434/3637920/3637342/3645016/3641244/3636950/3643757/3639192/3648000/3642563/3645762/3637706/3637713/3636453/3641886/3647713/3640208/3635819/3637727/3643823/3634947/3637862/3638991/3636535/3647693/3641370/3639303	ZCF18/SFL2/RGT1/ADAEC/CAALFM_C400390WA/GAL4/CUP9/HAL9/CAALFM_C602980CA/ECM22/GZF3/ZCF21/SUT1/PDE1/GLN3/UGA33/CAALFM_C209460CA/STB5/CAALFM_C202530WA/ZCF22/GCN4/CTA8/ARG83/RPO21/PPR1/RPC19/ZCF29/RCA1	28	22	3636434/3637920/3637342/3641244/3636950/3643757/3639192/3648000/3642563/3645762/3637706/3637713/3636453/3647713/3635819/3637727/3643823/3634947/3637862/3636535/3647693/3641370	6	3641635/3645016/3641886/3640208/3638991/3639303
BP	GO:0007049	cell cycle	2/241	26/1862	0.869381	0.999718	3635656/3645874	ASK1/CAALFM_C602300CA	2	1	3635656	1	3645874
BP	GO:0008380	RNA splicing	1/241	15/1862	0.876009	0.999718	3646233	ISY1	1	1	3646233	0
BP	GO:0019439	aromatic compound catabolic process	1/241	15/1862	0.876009	0.999718	3637713	PDE1	1	1	3637713	0
BP	GO:0008033	tRNA processing	2/241	27/1862	0.88299	0.999718	3643778/3647604	SMM1/CAALFM_C112570CA	2	2	3643778/3647604	0
BP	GO:0015672	monovalent inorganic cation transport	2/241	27/1862	0.88299	0.999718	3639546/3639861	HAK1/PHO87	2	2	3639546/3639861	0
BP	GO:0006974	cellular response to DNA damage stimulus	4/241	50/1862	0.905382	0.999718	3637342/3642966/3641632/3643106	ADAEC/CAALFM_C407010CA/FPG1/OGG1	4	1	3637342	3	3642966/3641632/3643106
BP	GO:0055086	nucleobase-containing small molecule metabolic process	4/241	50/1862	0.905382	0.999718	3636649/3639192/3639233/3637713	URA3/CAALFM_C602980CA/QCR7/PDE1	4	3	3636649/3639192/3637713	1	3639233
BP	GO:0044270	cellular nitrogen compound catabolic process	1/241	17/1862	0.906263	0.999718	3637713	PDE1	1	1	3637713	0
BP	GO:0046700	heterocycle catabolic process	1/241	17/1862	0.906263	0.999718	3637713	PDE1	1	1	3637713	0
BP	GO:1901361	organic cyclic compound catabolic process	1/241	17/1862	0.906263	0.999718	3637713	PDE1	1	1	3637713	0
BP	GO:0009117	nucleotide metabolic process	3/241	40/1862	0.907851	0.999718	3639192/3639233/3637713	CAALFM_C602980CA/QCR7/PDE1	3	2	3639192/3637713	1	3639233
BP	GO:0019538	protein metabolic process	42/241	382/1862	0.914603	0.999718	3637784/3644836/3634866/3640275/3642097/3643295/3640285/3637799/3638884/3646074/3647858/3645956/3636589/3635164/3647730/3644580/3640999/3643431/3647801/3636228/3641607/3646075/3636455/3648101/3639558/3637849/3636912/3639317/3636585/3645874/3636636/3639281/3646086/3642244/3642478/3638529/3634904/3639723/3645426/3645040/3639498/3643482	MNN1/CAALFM_CR06040WA/SWE1/NAM2/HSP104/DDI1/ALA1/CAALFM_C503150WA/CAALFM_C200700WA/CAALFM_C600340CA/PTP2/ILS1/AFG3/CAALFM_C304970CA/SUI1/SHA3/PIM1/RXT3/YAK1/KNS1/CAALFM_C601370WA/PKH3/CAALFM_C504290CA/DBF2/CAALFM_C106390WA/CAALFM_C402420CA/CAALFM_C103470CA/UBP6/MNT1/CAALFM_C602300CA/CAALFM_C302260CA/CDC5/CAALFM_C600390WA/CYM1/CAALFM_C105400CA/CAALFM_C307480WA/MNN12/CAALFM_CR00490WA/CAALFM_C101900…	42	17	3637784/3644836/3634866/3642097/3637799/3647858/3647730/3644580/3643431/3647801/3636228/3636455/3648101/3636912/3639281/3634904/3643482	25	3640275/3643295/3640285/3638884/3646074/3645956/3636589/3635164/3640999/3641607/3646075/3639558/3637849/3639317/3636585/3645874/3636636/3646086/3642244/3642478/3638529/3639723/3645426/3645040/3639498
BP	GO:0006753	nucleoside phosphate metabolic process	3/241	41/1862	0.916524	0.999718	3639192/3639233/3637713	CAALFM_C602980CA/QCR7/PDE1	3	2	3639192/3637713	1	3639233
BP	GO:0006397	mRNA processing	1/241	18/1862	0.918507	0.999718	3646233	ISY1	1	1	3646233	0
BP	GO:0009144	purine nucleoside triphosphate metabolic process	1/241	18/1862	0.918507	0.999718	3639233	QCR7	1	0		1	3639233
BP	GO:0009152	purine ribonucleotide biosynthetic process	1/241	18/1862	0.918507	0.999718	3639192	CAALFM_C602980CA	1	1	3639192	0
BP	GO:0009199	ribonucleoside triphosphate metabolic process	1/241	18/1862	0.918507	0.999718	3639233	QCR7	1	0		1	3639233
BP	GO:0009205	purine ribonucleoside triphosphate metabolic process	1/241	18/1862	0.918507	0.999718	3639233	QCR7	1	0		1	3639233
BP	GO:0009260	ribonucleotide biosynthetic process	1/241	18/1862	0.918507	0.999718	3639192	CAALFM_C602980CA	1	1	3639192	0
BP	GO:0046034	ATP metabolic process	1/241	18/1862	0.918507	0.999718	3639233	QCR7	1	0		1	3639233
BP	GO:0046390	ribose phosphate biosynthetic process	1/241	18/1862	0.918507	0.999718	3639192	CAALFM_C602980CA	1	1	3639192	0
BP	GO:0033554	cellular response to stress	4/241	53/1862	0.927834	0.999718	3637342/3642966/3641632/3643106	ADAEC/CAALFM_C407010CA/FPG1/OGG1	4	1	3637342	3	3642966/3641632/3643106
BP	GO:0009141	nucleoside triphosphate metabolic process	1/241	19/1862	0.929158	0.999718	3639233	QCR7	1	0		1	3639233
BP	GO:0016043	cellular component organization	9/241	102/1862	0.929302	0.999718	30515358/3647897/3638980/3642502/3646233/3643431/3646043/3645874/3642478	HHO1/HET1/PGA1/CAALFM_CR05970CA/ISY1/RXT3/ARC15/CAALFM_C602300CA/CAALFM_C105400CA	9	5	30515358/3638980/3646233/3643431/3646043	4	3647897/3642502/3645874/3642478
BP	GO:0006164	purine nucleotide biosynthetic process	1/241	20/1862	0.938422	0.999718	3639192	CAALFM_C602980CA	1	1	3639192	0
BP	GO:0009123	nucleoside monophosphate metabolic process	1/241	20/1862	0.938422	0.999718	3639233	QCR7	1	0		1	3639233
BP	GO:0009126	purine nucleoside monophosphate metabolic process	1/241	20/1862	0.938422	0.999718	3639233	QCR7	1	0		1	3639233
BP	GO:0009161	ribonucleoside monophosphate metabolic process	1/241	20/1862	0.938422	0.999718	3639233	QCR7	1	0		1	3639233
BP	GO:0009167	purine ribonucleoside monophosphate metabolic process	1/241	20/1862	0.938422	0.999718	3639233	QCR7	1	0		1	3639233
BP	GO:0044271	cellular nitrogen compound biosynthetic process	44/241	409/1862	0.944398	0.999718	3640275/3641635/3636434/3637920/3647071/3640285/3637342/3644116/3636649/3645016/3645956/3641244/3636950/3643757/3639192/3647730/3648000/3642563/3636455/3645762/3637706/3643940/3637713/3636453/3641886/3647713/3640208/3635819/3637727/3643823/3646086/3634947/3645211/3642478/3636812/3637862/3638991/3636535/3647693/3639723/3641370/3641233/3645426/3639303	NAM2/ZCF18/SFL2/RGT1/COX15/ALA1/ADAEC/SPE2/URA3/CAALFM_C400390WA/ILS1/GAL4/CUP9/HAL9/CAALFM_C602980CA/SUI1/ECM22/GZF3/CAALFM_C504290CA/ZCF21/SUT1/HEM3/PDE1/GLN3/UGA33/CAALFM_C209460CA/STB5/CAALFM_C202530WA/ZCF22/GCN4/CAALFM_C600390WA/CTA8/HEM15/CAALFM_C105400CA/SNO1/ARG83/RPO21/PPR1/RPC19/CAALFM_CR00490WA/ZCF29/CAALFM_C210860CA/CAALFM_C101900CA/RCA1	44	28	3636434/3637920/3637342/3644116/3636649/3641244/3636950/3643757/3639192/3647730/3648000/3642563/3636455/3645762/3637706/3643940/3637713/3636453/3647713/3635819/3637727/3643823/3634947/3636812/3637862/3636535/3647693/3641370	16	3640275/3641635/3647071/3640285/3645016/3645956/3641886/3640208/3646086/3645211/3642478/3638991/3639723/3641233/3645426/3639303
BP	GO:0009451	RNA modification	1/241	21/1862	0.946478	0.999718	3647604	CAALFM_C112570CA	1	1	3647604	0
BP	GO:0016071	mRNA metabolic process	1/241	21/1862	0.946478	0.999718	3646233	ISY1	1	1	3646233	0
BP	GO:0051276	chromosome organization	3/241	46/1862	0.949741	0.999718	30515358/3643431/3645874	HHO1/RXT3/CAALFM_C602300CA	3	2	30515358/3643431	1	3645874
BP	GO:0072522	purine-containing compound biosynthetic process	1/241	22/1862	0.953485	0.999718	3639192	CAALFM_C602980CA	1	1	3639192	0
BP	GO:0044085	cellular component biogenesis	4/241	58/1862	0.95483	0.999718	30515358/3642502/3646233/3646043	HHO1/CAALFM_CR05970CA/ISY1/ARC15	4	3	30515358/3646233/3646043	1	3642502
BP	GO:0016070	RNA metabolic process	36/241	347/1862	0.955122	0.999718	3640275/3641635/3636434/3637920/3640285/3637342/3643778/3645016/3645956/3635700/3641244/3636950/3643757/3646233/3647604/3648000/3636824/3642563/3645762/3637706/3636453/3641886/3647713/3645124/3640208/3635819/3637727/3643823/3646086/3634947/3637862/3638991/3636535/3647693/3641370/3639303	NAM2/ZCF18/SFL2/RGT1/ALA1/ADAEC/SMM1/CAALFM_C400390WA/ILS1/CAALFM_C401280CA/GAL4/CUP9/HAL9/ISY1/CAALFM_C112570CA/ECM22/FRS2/GZF3/ZCF21/SUT1/GLN3/UGA33/CAALFM_C209460CA/CAALFM_CR03110WA/STB5/CAALFM_C202530WA/ZCF22/GCN4/CAALFM_C600390WA/CTA8/ARG83/RPO21/PPR1/RPC19/ZCF29/RCA1	36	25	3636434/3637920/3637342/3643778/3635700/3641244/3636950/3643757/3646233/3647604/3648000/3636824/3642563/3645762/3637706/3636453/3647713/3635819/3637727/3643823/3634947/3637862/3636535/3647693/3641370	11	3640275/3641635/3640285/3645016/3645956/3641886/3645124/3640208/3646086/3638991/3639303
BP	GO:0034470	ncRNA processing	2/241	42/1862	0.979535	0.999718	3643778/3647604	SMM1/CAALFM_C112570CA	2	2	3643778/3647604	0
BP	GO:0033036	macromolecule localization	4/241	67/1862	0.981448	0.999718	3647897/3645870/3648085/3641183	HET1/SEC27/CAALFM_C406130WA/CAALFM_C404180CA	4	1	3648085	3	3647897/3645870/3641183
BP	GO:0044267	cellular protein metabolic process	34/241	348/1862	0.9819	0.999718	3637784/3644836/3634866/3640275/3640285/3637799/3647858/3645956/3635164/3647730/3644580/3643431/3647801/3636228/3641607/3646075/3636455/3648101/3639558/3637849/3636912/3639317/3636585/3645874/3636636/3639281/3646086/3642478/3638529/3634904/3639723/3645426/3639498/3643482	MNN1/CAALFM_CR06040WA/SWE1/NAM2/ALA1/CAALFM_C503150WA/PTP2/ILS1/CAALFM_C304970CA/SUI1/SHA3/RXT3/YAK1/KNS1/CAALFM_C601370WA/PKH3/CAALFM_C504290CA/DBF2/CAALFM_C106390WA/CAALFM_C402420CA/CAALFM_C103470CA/UBP6/MNT1/CAALFM_C602300CA/CAALFM_C302260CA/CDC5/CAALFM_C600390WA/CAALFM_C105400CA/CAALFM_C307480WA/MNN12/CAALFM_CR00490WA/CAALFM_C101900CA/NPR1/TPK2	34	16	3637784/3644836/3634866/3637799/3647858/3647730/3644580/3643431/3647801/3636228/3636455/3648101/3636912/3639281/3634904/3643482	18	3640275/3640285/3645956/3635164/3641607/3646075/3639558/3637849/3639317/3636585/3645874/3636636/3646086/3642478/3638529/3639723/3645426/3639498
BP	GO:0009165	nucleotide biosynthetic process	1/241	30/1862	0.984905	0.999718	3639192	CAALFM_C602980CA	1	1	3639192	0
BP	GO:0022613	ribonucleoprotein complex biogenesis	1/241	30/1862	0.984905	0.999718	3646233	ISY1	1	1	3646233	0
BP	GO:1901293	nucleoside phosphate biosynthetic process	1/241	30/1862	0.984905	0.999718	3639192	CAALFM_C602980CA	1	1	3639192	0
BP	GO:0006996	organelle organization	5/241	81/1862	0.985928	0.999718	30515358/3642502/3643431/3646043/3645874	HHO1/CAALFM_CR05970CA/RXT3/ARC15/CAALFM_C602300CA	5	3	30515358/3643431/3646043	2	3642502/3645874
BP	GO:0006259	DNA metabolic process	5/241	85/1862	0.990516	0.999718	3637342/3642966/3641632/3642989/3643106	ADAEC/CAALFM_C407010CA/FPG1/RNR1/OGG1	5	1	3637342	4	3642966/3641632/3642989/3643106
BP	GO:0009059	macromolecule biosynthetic process	42/241	430/1862	0.991214	0.999718	3637784/3640275/3641635/3636434/3637920/3640285/3637342/3641893/3645016/3645956/3641244/3636950/3643757/3647730/3648000/3642989/3642563/3641607/3636455/3645762/3637849/3637706/3636453/3641886/3647713/3640208/3635819/3636585/3637727/3643823/3646086/3634947/3642478/3637862/3638991/3636535/3647693/3634904/3639723/3641370/3645426/3639303	MNN1/NAM2/ZCF18/SFL2/RGT1/ALA1/ADAEC/CHS2/CAALFM_C400390WA/ILS1/GAL4/CUP9/HAL9/SUI1/ECM22/RNR1/GZF3/CAALFM_C601370WA/CAALFM_C504290CA/ZCF21/CAALFM_C402420CA/SUT1/GLN3/UGA33/CAALFM_C209460CA/STB5/CAALFM_C202530WA/MNT1/ZCF22/GCN4/CAALFM_C600390WA/CTA8/CAALFM_C105400CA/ARG83/RPO21/PPR1/RPC19/MNN12/CAALFM_CR00490WA/ZCF29/CAALFM_C101900CA/RCA1	42	25	3637784/3636434/3637920/3637342/3641893/3641244/3636950/3643757/3647730/3648000/3642563/3636455/3645762/3637706/3636453/3647713/3635819/3637727/3643823/3634947/3637862/3636535/3647693/3634904/3641370	17	3640275/3641635/3640285/3645016/3645956/3642989/3641607/3637849/3641886/3640208/3636585/3646086/3642478/3638991/3639723/3645426/3639303
BP	GO:0006412	translation	9/241	129/1862	0.991404	0.999718	3640275/3640285/3645956/3647730/3636455/3646086/3642478/3639723/3645426	NAM2/ALA1/ILS1/SUI1/CAALFM_C504290CA/CAALFM_C600390WA/CAALFM_C105400CA/CAALFM_CR00490WA/CAALFM_C101900CA	9	2	3647730/3636455	7	3640275/3640285/3645956/3646086/3642478/3639723/3645426
BP	GO:0043043	peptide biosynthetic process	9/241	130/1862	0.992111	0.999718	3640275/3640285/3645956/3647730/3636455/3646086/3642478/3639723/3645426	NAM2/ALA1/ILS1/SUI1/CAALFM_C504290CA/CAALFM_C600390WA/CAALFM_C105400CA/CAALFM_CR00490WA/CAALFM_C101900CA	9	2	3647730/3636455	7	3640275/3640285/3645956/3646086/3642478/3639723/3645426
BP	GO:0071840	cellular component organization or biogenesis	9/241	130/1862	0.992111	0.999718	30515358/3647897/3638980/3642502/3646233/3643431/3646043/3645874/3642478	HHO1/HET1/PGA1/CAALFM_CR05970CA/ISY1/RXT3/ARC15/CAALFM_C602300CA/CAALFM_C105400CA	9	5	30515358/3638980/3646233/3643431/3646043	4	3647897/3642502/3645874/3642478
BP	GO:0051649	establishment of localization in cell	3/241	63/1862	0.992139	0.999718	3645870/3642791/3647441	SEC27/CAALFM_C406460CA/MID1	3	2	3642791/3647441	1	3645870
BP	GO:0071705	nitrogen compound transport	3/241	63/1862	0.992139	0.999718	3645870/3642793/3636553	SEC27/CAALFM_C406440CA/MEP1	3	2	3642793/3636553	1	3645870
BP	GO:0071702	organic substance transport	3/241	64/1862	0.992987	0.999718	3647897/3645870/3642793	HET1/SEC27/CAALFM_C406440CA	3	1	3642793	2	3647897/3645870
BP	GO:0051641	cellular localization	4/241	77/1862	0.99349	0.999718	3645870/3642791/3648085/3647441	SEC27/CAALFM_C406460CA/CAALFM_C406130WA/MID1	4	3	3642791/3648085/3647441	1	3645870
BP	GO:0006260	DNA replication	1/241	36/1862	0.993532	0.999718	3642989	RNR1	1	0		1	3642989
BP	GO:0034645	cellular macromolecule biosynthetic process	41/241	427/1862	0.993577	0.999718	3637784/3640275/3641635/3636434/3637920/3640285/3637342/3645016/3645956/3641244/3636950/3643757/3647730/3648000/3642989/3642563/3641607/3636455/3645762/3637849/3637706/3636453/3641886/3647713/3640208/3635819/3636585/3637727/3643823/3646086/3634947/3642478/3637862/3638991/3636535/3647693/3634904/3639723/3641370/3645426/3639303	MNN1/NAM2/ZCF18/SFL2/RGT1/ALA1/ADAEC/CAALFM_C400390WA/ILS1/GAL4/CUP9/HAL9/SUI1/ECM22/RNR1/GZF3/CAALFM_C601370WA/CAALFM_C504290CA/ZCF21/CAALFM_C402420CA/SUT1/GLN3/UGA33/CAALFM_C209460CA/STB5/CAALFM_C202530WA/MNT1/ZCF22/GCN4/CAALFM_C600390WA/CTA8/CAALFM_C105400CA/ARG83/RPO21/PPR1/RPC19/MNN12/CAALFM_CR00490WA/ZCF29/CAALFM_C101900CA/RCA1	41	24	3637784/3636434/3637920/3637342/3641244/3636950/3643757/3647730/3648000/3642563/3636455/3645762/3637706/3636453/3647713/3635819/3637727/3643823/3634947/3637862/3636535/3647693/3634904/3641370	17	3640275/3641635/3640285/3645016/3645956/3642989/3641607/3637849/3641886/3640208/3636585/3646086/3642478/3638991/3639723/3645426/3639303
BP	GO:0006518	peptide metabolic process	9/241	133/1862	0.99392	0.999718	3640275/3640285/3645956/3647730/3636455/3646086/3642478/3639723/3645426	NAM2/ALA1/ILS1/SUI1/CAALFM_C504290CA/CAALFM_C600390WA/CAALFM_C105400CA/CAALFM_CR00490WA/CAALFM_C101900CA	9	2	3647730/3636455	7	3640275/3640285/3645956/3646086/3642478/3639723/3645426
BP	GO:0006396	RNA processing	4/241	80/1862	0.995293	0.999718	3643778/3635700/3646233/3647604	SMM1/CAALFM_C401280CA/ISY1/CAALFM_C112570CA	4	4	3643778/3635700/3646233/3647604	0
BP	GO:0043604	amide biosynthetic process	9/241	136/1862	0.995335	0.999718	3640275/3640285/3645956/3647730/3636455/3646086/3642478/3639723/3645426	NAM2/ALA1/ILS1/SUI1/CAALFM_C504290CA/CAALFM_C600390WA/CAALFM_C105400CA/CAALFM_CR00490WA/CAALFM_C101900CA	9	2	3647730/3636455	7	3640275/3640285/3645956/3646086/3642478/3639723/3645426
BP	GO:0034613	cellular protein localization	2/241	55/1862	0.995903	0.999718	3645870/3648085	SEC27/CAALFM_C406130WA	2	1	3648085	1	3645870
BP	GO:0070727	cellular macromolecule localization	2/241	55/1862	0.995903	0.999718	3645870/3648085	SEC27/CAALFM_C406130WA	2	1	3648085	1	3645870
BP	GO:0090304	nucleic acid metabolic process	40/241	427/1862	0.996135	0.999718	3640275/3641635/3636434/3637920/3640285/3637342/3643778/3645016/3645956/3635700/3641244/3642966/3636950/3643757/3646233/3647604/3648000/3641632/3636824/3642989/3642563/3643106/3645762/3637706/3636453/3641886/3647713/3645124/3640208/3635819/3637727/3643823/3646086/3634947/3637862/3638991/3636535/3647693/3641370/3639303	NAM2/ZCF18/SFL2/RGT1/ALA1/ADAEC/SMM1/CAALFM_C400390WA/ILS1/CAALFM_C401280CA/GAL4/CAALFM_C407010CA/CUP9/HAL9/ISY1/CAALFM_C112570CA/ECM22/FPG1/FRS2/RNR1/GZF3/OGG1/ZCF21/SUT1/GLN3/UGA33/CAALFM_C209460CA/CAALFM_CR03110WA/STB5/CAALFM_C202530WA/ZCF22/GCN4/CAALFM_C600390WA/CTA8/ARG83/RPO21/PPR1/RPC19/ZCF29/RCA1	40	25	3636434/3637920/3637342/3643778/3635700/3641244/3636950/3643757/3646233/3647604/3648000/3636824/3642563/3645762/3637706/3636453/3647713/3635819/3637727/3643823/3634947/3637862/3636535/3647693/3641370	15	3640275/3641635/3640285/3645016/3645956/3642966/3641632/3642989/3643106/3641886/3645124/3640208/3646086/3638991/3639303
BP	GO:0043603	cellular amide metabolic process	9/241	142/1862	0.997288	0.999718	3640275/3640285/3645956/3647730/3636455/3646086/3642478/3639723/3645426	NAM2/ALA1/ILS1/SUI1/CAALFM_C504290CA/CAALFM_C600390WA/CAALFM_C105400CA/CAALFM_CR00490WA/CAALFM_C101900CA	9	2	3647730/3636455	7	3640275/3640285/3645956/3646086/3642478/3639723/3645426
BP	GO:0006139	nucleobase-containing compound metabolic process	45/241	479/1862	0.997734	0.999718	3640275/3641635/3636434/3637920/3640285/3637342/3643778/3636649/3645016/3645956/3635700/3641244/3642966/3636950/3643757/3639192/3639233/3646233/3647604/3638014/3648000/3641632/3636824/3642989/3642563/3643106/3645762/3637706/3637713/3636453/3641886/3647713/3645124/3640208/3635819/3637727/3643823/3646086/3634947/3637862/3638991/3636535/3647693/3641370/3639303	NAM2/ZCF18/SFL2/RGT1/ALA1/ADAEC/SMM1/URA3/CAALFM_C400390WA/ILS1/CAALFM_C401280CA/GAL4/CAALFM_C407010CA/CUP9/HAL9/CAALFM_C602980CA/QCR7/ISY1/CAALFM_C112570CA/RAD3/ECM22/FPG1/FRS2/RNR1/GZF3/OGG1/ZCF21/SUT1/PDE1/GLN3/UGA33/CAALFM_C209460CA/CAALFM_CR03110WA/STB5/CAALFM_C202530WA/ZCF22/GCN4/CAALFM_C600390WA/CTA8/ARG83/RPO21/PPR1/RPC19/ZCF29/RCA1	45	28	3636434/3637920/3637342/3643778/3636649/3635700/3641244/3636950/3643757/3639192/3646233/3647604/3648000/3636824/3642563/3645762/3637706/3637713/3636453/3647713/3635819/3637727/3643823/3634947/3637862/3636535/3647693/3641370	17	3640275/3641635/3640285/3645016/3645956/3642966/3639233/3638014/3641632/3642989/3643106/3641886/3645124/3640208/3646086/3638991/3639303
BP	GO:0008104	protein localization	2/241	61/1862	0.998091	0.999718	3645870/3648085	SEC27/CAALFM_C406130WA	2	1	3648085	1	3645870
BP	GO:0046907	intracellular transport	2/241	61/1862	0.998091	0.999718	3645870/3642791	SEC27/CAALFM_C406460CA	2	1	3642791	1	3645870
BP	GO:0010467	gene expression	39/241	434/1862	0.998565	0.999718	3640275/3641635/3636434/3637920/3640285/3637342/3643778/3645016/3645956/3635700/3641244/3636950/3643757/3647730/3646233/3647604/3648000/3642563/3636455/3645762/3637706/3636453/3641886/3647713/3640208/3635819/3637727/3643823/3646086/3634947/3642478/3637862/3638991/3636535/3647693/3639723/3641370/3645426/3639303	NAM2/ZCF18/SFL2/RGT1/ALA1/ADAEC/SMM1/CAALFM_C400390WA/ILS1/CAALFM_C401280CA/GAL4/CUP9/HAL9/SUI1/ISY1/CAALFM_C112570CA/ECM22/GZF3/CAALFM_C504290CA/ZCF21/SUT1/GLN3/UGA33/CAALFM_C209460CA/STB5/CAALFM_C202530WA/ZCF22/GCN4/CAALFM_C600390WA/CTA8/CAALFM_C105400CA/ARG83/RPO21/PPR1/RPC19/CAALFM_CR00490WA/ZCF29/CAALFM_C101900CA/RCA1	39	26	3636434/3637920/3637342/3643778/3635700/3641244/3636950/3643757/3647730/3646233/3647604/3648000/3642563/3636455/3645762/3637706/3636453/3647713/3635819/3637727/3643823/3634947/3637862/3636535/3647693/3641370	13	3640275/3641635/3640285/3645016/3645956/3641886/3640208/3646086/3642478/3638991/3639723/3645426/3639303
BP	GO:0006886	intracellular protein transport	1/241	50/1862	0.999115	0.999718	3645870	SEC27	1	0		1	3645870
BP	GO:0015031	protein transport	1/241	56/1862	0.999625	0.999718	3645870	SEC27	1	0		1	3645870
BP	GO:0015833	peptide transport	1/241	56/1862	0.999625	0.999718	3645870	SEC27	1	0		1	3645870
BP	GO:0042886	amide transport	1/241	56/1862	0.999625	0.999718	3645870	SEC27	1	0		1	3645870
BP	GO:0045184	establishment of protein localization	1/241	58/1862	0.999718	0.999718	3645870	SEC27	1	0		1	3645870
CC	GO:0000786	nucleosome	8/122	10/970	1.83676e-06	0.000143267	3647326/30515358/3644707/3644716/3644715/3645659/3645658/3638322	HHT2/HHO1/HHT21/CAALFM_C104180WA/HTA2/HTB1/HTA1/HTA3	8	8	3647326/30515358/3644707/3644716/3644715/3645659/3645658/3638322	0
CC	GO:0032993	protein-DNA complex	8/122	11/970	6.02617e-06	0.00015668	3647326/30515358/3644707/3644716/3644715/3645659/3645658/3638322	HHT2/HHO1/HHT21/CAALFM_C104180WA/HTA2/HTB1/HTA1/HTA3	8	8	3647326/30515358/3644707/3644716/3644715/3645659/3645658/3638322	0
CC	GO:0044815	DNA packaging complex	8/122	11/970	6.02617e-06	0.00015668	3647326/30515358/3644707/3644716/3644715/3645659/3645658/3638322	HHT2/HHO1/HHT21/CAALFM_C104180WA/HTA2/HTB1/HTA1/HTA3	8	8	3647326/30515358/3644707/3644716/3644715/3645659/3645658/3638322	0
CC	GO:0000785	chromatin	8/122	14/970	7.86073e-05	0.00153284	3647326/30515358/3644707/3644716/3644715/3645659/3645658/3638322	HHT2/HHO1/HHT21/CAALFM_C104180WA/HTA2/HTB1/HTA1/HTA3	8	8	3647326/30515358/3644707/3644716/3644715/3645659/3645658/3638322	0
CC	GO:0016021	integral component of membrane	43/122	235/970	0.00227475	0.0295718	3638048/3642634/3646567/3639530/3639260/3640573/3637827/3640307/3641932/3645361/3647071/3642298/3645360/3637701/3642635/3641625/3638884/3642793/3634898/3640244/3646284/3643440/3637048/3646404/3643209/3640558/3647466/3645976/3648427/3640956/3637036/3646047/3638891/3647141/3645969/3639845/3641882/3637401/3637919/3636130/3641617/3639256/3640560	HGT12/GIT3/RTA2/CAALFM_C106860WA/MDR1/NGT1/TNA1/ORM1/CAALFM_CR09390CA/CAALFM_C403700WA/COX15/CAALFM_C207760WA/CAALFM_C403710CA/CAALFM_C503080CA/GIT4/CAALFM_C601870CA/CAALFM_C200700WA/CAALFM_C406440CA/CAALFM_C109220WA/CAALFM_C603540WA/ATM1/ITR1/FLU1/HGT9/HXT5/HGT19/CAALFM_C307850WA/CAALFM_C604550CA/CTR2/TPO4/CAALFM_C701600WA/CAALFM_CR07480WA/CAALFM_C200940WA/NHX1/NAG3/ATO2/SSU1/CAALFM_C203800CA/EM…	43	26	3642634/3646567/3639530/3640573/3641932/3645361/3642298/3645360/3637701/3642635/3642793/3634898/3643440/3637048/3646404/3643209/3640558/3648427/3640956/3646047/3638891/3641882/3637401/3637919/3636130/3640560	17	3638048/3639260/3637827/3640307/3647071/3641625/3638884/3640244/3646284/3647466/3645976/3637036/3647141/3645969/3639845/3641617/3639256
CC	GO:0031224	intrinsic component of membrane	43/122	235/970	0.00227475	0.0295718	3638048/3642634/3646567/3639530/3639260/3640573/3637827/3640307/3641932/3645361/3647071/3642298/3645360/3637701/3642635/3641625/3638884/3642793/3634898/3640244/3646284/3643440/3637048/3646404/3643209/3640558/3647466/3645976/3648427/3640956/3637036/3646047/3638891/3647141/3645969/3639845/3641882/3637401/3637919/3636130/3641617/3639256/3640560	HGT12/GIT3/RTA2/CAALFM_C106860WA/MDR1/NGT1/TNA1/ORM1/CAALFM_CR09390CA/CAALFM_C403700WA/COX15/CAALFM_C207760WA/CAALFM_C403710CA/CAALFM_C503080CA/GIT4/CAALFM_C601870CA/CAALFM_C200700WA/CAALFM_C406440CA/CAALFM_C109220WA/CAALFM_C603540WA/ATM1/ITR1/FLU1/HGT9/HXT5/HGT19/CAALFM_C307850WA/CAALFM_C604550CA/CTR2/TPO4/CAALFM_C701600WA/CAALFM_CR07480WA/CAALFM_C200940WA/NHX1/NAG3/ATO2/SSU1/CAALFM_C203800CA/EM…	43	26	3642634/3646567/3639530/3640573/3641932/3645361/3642298/3645360/3637701/3642635/3642793/3634898/3643440/3637048/3646404/3643209/3640558/3648427/3640956/3646047/3638891/3641882/3637401/3637919/3636130/3640560	17	3638048/3639260/3637827/3640307/3647071/3641625/3638884/3640244/3646284/3647466/3645976/3637036/3647141/3645969/3639845/3641617/3639256
CC	GO:0016020	membrane	73/122	465/970	0.00327123	0.0364509	3638048/3642634/3646567/3639530/3639870/3639260/3644557/3640573/3636545/3637827/3640307/3641932/3645361/3647071/3636802/3642298/3642933/3645870/3645360/3637701/3642635/3641625/3638884/3642910/3642793/3634898/3645270/3640093/3640244/3645365/3646284/3643440/3637048/3639233/3636968/3646404/3637004/3641727/3643209/3641607/3640558/3639546/3641721/3635684/3639861/3647466/3637849/3645976/3648427/3637426…	HGT12/GIT3/RTA2/CAALFM_C106860WA/CAALFM_C106000WA/MDR1/CHO1/NGT1/MRV2/TNA1/ORM1/CAALFM_CR09390CA/CAALFM_C403700WA/COX15/HNM4/CAALFM_C207760WA/CAALFM_C406910WA/SEC27/CAALFM_C403710CA/CAALFM_C503080CA/GIT4/CAALFM_C601870CA/CAALFM_C200700WA/ARR3/CAALFM_C406440CA/CAALFM_C109220WA/EMP46/HNM3/CAALFM_C603540WA/CDR3/ATM1/ITR1/FLU1/QCR7/TOM40/HGT9/FMP45/RCT1/HXT5/CAALFM_C601370WA/HGT19/HAK1/SAM50/AGP2/PHO…	73	46	3642634/3646567/3639530/3639870/3644557/3640573/3636545/3641932/3645361/3636802/3642298/3642933/3645360/3637701/3642635/3642793/3634898/3645270/3645365/3643440/3637048/3646404/3637004/3641727/3643209/3640558/3639546/3641721/3635684/3639861/3648427/3640956/3636553/3646954/3646047/3635752/3638891/3636616/3641882/3642329/3637401/3637919/3636130/3635764/3636511/3640560	27	3638048/3639260/3637827/3640307/3647071/3645870/3641625/3638884/3642910/3640093/3640244/3646284/3639233/3636968/3641607/3647466/3637849/3645976/3637426/3637036/3636585/3647141/3645969/3641183/3639845/3641617/3639256
CC	GO:0044425	membrane part	49/122	297/970	0.0106114	0.103461	3638048/3642634/3646567/3639530/3639260/3640573/3637827/3640307/3641932/3645361/3647071/3642298/3645870/3645360/3637701/3642635/3641625/3638884/3642793/3634898/3640244/3646284/3643440/3637048/3639233/3646404/3643209/3641607/3640558/3647466/3637849/3645976/3648427/3640956/3637036/3646047/3638891/3647141/3645969/3641183/3639845/3641882/3637401/3637919/3636130/3641617/3639256/3636511/3640560	HGT12/GIT3/RTA2/CAALFM_C106860WA/MDR1/NGT1/TNA1/ORM1/CAALFM_CR09390CA/CAALFM_C403700WA/COX15/CAALFM_C207760WA/SEC27/CAALFM_C403710CA/CAALFM_C503080CA/GIT4/CAALFM_C601870CA/CAALFM_C200700WA/CAALFM_C406440CA/CAALFM_C109220WA/CAALFM_C603540WA/ATM1/ITR1/FLU1/QCR7/HGT9/HXT5/CAALFM_C601370WA/HGT19/CAALFM_C307850WA/CAALFM_C402420CA/CAALFM_C604550CA/CTR2/TPO4/CAALFM_C701600WA/CAALFM_CR07480WA/CAALFM_C200…	49	27	3642634/3646567/3639530/3640573/3641932/3645361/3642298/3645360/3637701/3642635/3642793/3634898/3643440/3637048/3646404/3643209/3640558/3648427/3640956/3646047/3638891/3641882/3637401/3637919/3636130/3636511/3640560	22	3638048/3639260/3637827/3640307/3647071/3645870/3641625/3638884/3640244/3646284/3639233/3641607/3647466/3637849/3645976/3637036/3647141/3645969/3641183/3639845/3641617/3639256
CC	GO:0031984	organelle subcompartment	6/122	24/970	0.0695456	0.602729	3640307/3642793/3641607/3637849/3641183/3637401	ORM1/CAALFM_C406440CA/CAALFM_C601370WA/CAALFM_C402420CA/CAALFM_C404180CA/CAALFM_C203800CA	6	2	3642793/3637401	4	3640307/3641607/3637849/3641183
CC	GO:0044427	chromosomal part	9/122	43/970	0.079046	0.616559	3647326/30515358/3644707/3644716/3644715/3645659/3635656/3645658/3638322	HHT2/HHO1/HHT21/CAALFM_C104180WA/HTA2/HTB1/ASK1/HTA1/HTA3	9	9	3647326/30515358/3644707/3644716/3644715/3645659/3635656/3645658/3638322	0
CC	GO:0015630	microtubule cytoskeleton	3/122	11/970	0.15073	1	3635656/3635236/3636415	ASK1/DYN1/CAALFM_C504890CA	3	3	3635656/3635236/3636415	0
CC	GO:0005783	endoplasmic reticulum	6/122	31/970	0.184304	1	3640307/3641607/3637849/3636457/3641183/3639350	ORM1/CAALFM_C601370WA/CAALFM_C402420CA/TIP20/CAALFM_C404180CA/ROT1	6	2	3636457/3639350	4	3640307/3641607/3637849/3641183
CC	GO:0005694	chromosome	9/122	53/970	0.211654	1	3647326/30515358/3644707/3644716/3644715/3645659/3635656/3645658/3638322	HHT2/HHO1/HHT21/CAALFM_C104180WA/HTA2/HTB1/ASK1/HTA1/HTA3	9	9	3647326/30515358/3644707/3644716/3644715/3645659/3635656/3645658/3638322	0
CC	GO:0005856	cytoskeleton	4/122	20/970	0.236691	1	3635656/3646043/3635236/3636415	ASK1/ARC15/DYN1/CAALFM_C504890CA	4	4	3635656/3646043/3635236/3636415	0
CC	GO:0044430	cytoskeletal part	4/122	20/970	0.236691	1	3635656/3646043/3635236/3636415	ASK1/ARC15/DYN1/CAALFM_C504890CA	4	4	3635656/3646043/3635236/3636415	0
CC	GO:0012505	endomembrane system	10/122	62/970	0.242772	1	3640307/3642793/3641607/3637849/3636457/3645351/3641183/3637401/3639350/3636511	ORM1/CAALFM_C406440CA/CAALFM_C601370WA/CAALFM_C402420CA/TIP20/NUP84/CAALFM_C404180CA/CAALFM_C203800CA/ROT1/CAALFM_C504580CA	10	6	3642793/3636457/3645351/3637401/3639350/3636511	4	3640307/3641607/3637849/3641183
CC	GO:0005789	endoplasmic reticulum membrane	4/122	22/970	0.29579	1	3640307/3641607/3637849/3641183	ORM1/CAALFM_C601370WA/CAALFM_C402420CA/CAALFM_C404180CA	4	0		4	3640307/3641607/3637849/3641183
CC	GO:0042175	nuclear outer membrane-endoplasmic reticulum membrane network	4/122	22/970	0.29579	1	3640307/3641607/3637849/3641183	ORM1/CAALFM_C601370WA/CAALFM_C402420CA/CAALFM_C404180CA	4	0		4	3640307/3641607/3637849/3641183
CC	GO:0098827	endoplasmic reticulum subcompartment	4/122	22/970	0.29579	1	3640307/3641607/3637849/3641183	ORM1/CAALFM_C601370WA/CAALFM_C402420CA/CAALFM_C404180CA	4	0		4	3640307/3641607/3637849/3641183
CC	GO:0044432	endoplasmic reticulum part	4/122	23/970	0.326067	1	3640307/3641607/3637849/3641183	ORM1/CAALFM_C601370WA/CAALFM_C402420CA/CAALFM_C404180CA	4	0		4	3640307/3641607/3637849/3641183
CC	GO:0015629	actin cytoskeleton	2/122	10/970	0.364352	1	3646043/3636415	ARC15/CAALFM_C504890CA	2	2	3646043/3636415	0
CC	GO:0005794	Golgi apparatus	2/122	12/970	0.457509	1	3642793/3637401	CAALFM_C406440CA/CAALFM_C203800CA	2	2	3642793/3637401	0
CC	GO:0044431	Golgi apparatus part	2/122	12/970	0.457509	1	3642793/3637401	CAALFM_C406440CA/CAALFM_C203800CA	2	2	3642793/3637401	0
CC	GO:0098588	bounding membrane of organelle	4/122	30/970	0.533992	1	3642793/3636968/3637401/3636511	CAALFM_C406440CA/TOM40/CAALFM_C203800CA/CAALFM_C504580CA	4	3	3642793/3637401/3636511	1	3636968
CC	GO:0071944	cell periphery	3/122	22/970	0.536985	1	3648085/3637004/3635764	CAALFM_C406130WA/FMP45/SRD1	3	3	3648085/3637004/3635764	0
CC	GO:0005886	plasma membrane	2/122	16/970	0.61775	1	3637004/3635764	FMP45/SRD1	2	2	3637004/3635764	0
CC	GO:0005739	mitochondrion	5/122	42/970	0.626413	1	3643103/3635671/3639233/3636968/3642019	MAM33/CYT2/QCR7/TOM40/CAALFM_C112280CA	5	0		5	3643103/3635671/3639233/3636968/3642019
CC	GO:0044422	organelle part	25/122	208/970	0.646981	1	3647326/30515358/3640307/3644707/3644716/3643103/3644715/3642793/3645659/3639233/3636968/3635656/3641607/3645658/3646043/3637849/3638322/3645874/3645351/3635236/3636415/3641183/3637401/3638399/3636511	HHT2/HHO1/ORM1/HHT21/CAALFM_C104180WA/MAM33/HTA2/CAALFM_C406440CA/HTB1/QCR7/TOM40/ASK1/CAALFM_C601370WA/HTA1/ARC15/CAALFM_C402420CA/HTA3/CAALFM_C602300CA/NUP84/DYN1/CAALFM_C504890CA/CAALFM_C404180CA/CAALFM_C203800CA/CAALFM_C303100CA/CAALFM_C504580CA	25	17	3647326/30515358/3644707/3644716/3644715/3642793/3645659/3635656/3645658/3646043/3638322/3645351/3635236/3636415/3637401/3638399/3636511	8	3640307/3643103/3639233/3636968/3641607/3637849/3645874/3641183
CC	GO:0044446	intracellular organelle part	25/122	208/970	0.646981	1	3647326/30515358/3640307/3644707/3644716/3643103/3644715/3642793/3645659/3639233/3636968/3635656/3641607/3645658/3646043/3637849/3638322/3645874/3645351/3635236/3636415/3641183/3637401/3638399/3636511	HHT2/HHO1/ORM1/HHT21/CAALFM_C104180WA/MAM33/HTA2/CAALFM_C406440CA/HTB1/QCR7/TOM40/ASK1/CAALFM_C601370WA/HTA1/ARC15/CAALFM_C402420CA/HTA3/CAALFM_C602300CA/NUP84/DYN1/CAALFM_C504890CA/CAALFM_C404180CA/CAALFM_C203800CA/CAALFM_C303100CA/CAALFM_C504580CA	25	17	3647326/30515358/3644707/3644716/3644715/3642793/3645659/3635656/3645658/3646043/3638322/3645351/3635236/3636415/3637401/3638399/3636511	8	3640307/3643103/3639233/3636968/3641607/3637849/3645874/3641183
CC	GO:0000777	condensed chromosome kinetochore	1/122	11/970	0.773903	1	3635656	ASK1	1	1	3635656	0
CC	GO:0000779	condensed chromosome, centromeric region	1/122	11/970	0.773903	1	3635656	ASK1	1	1	3635656	0
CC	GO:0000794	condensed nuclear chromosome	1/122	11/970	0.773903	1	3635656	ASK1	1	1	3635656	0
CC	GO:0044429	mitochondrial part	3/122	34/970	0.82367	1	3643103/3639233/3636968	MAM33/QCR7/TOM40	3	0		3	3643103/3639233/3636968
CC	GO:0098800	inner mitochondrial membrane protein complex	1/122	13/970	0.827796	1	3639233	QCR7	1	0		1	3639233
CC	GO:0031090	organelle membrane	5/122	54/970	0.833209	1	3642793/3639233/3636968/3637401/3636511	CAALFM_C406440CA/QCR7/TOM40/CAALFM_C203800CA/CAALFM_C504580CA	5	3	3642793/3637401/3636511	2	3639233/3636968
CC	GO:1990234	transferase complex	3/122	35/970	0.838852	1	3635164/3645874/3638399	CAALFM_C304970CA/CAALFM_C602300CA/CAALFM_C303100CA	3	1	3638399	2	3635164/3645874
CC	GO:0098805	whole membrane	2/122	26/970	0.859716	1	3636968/3636511	TOM40/CAALFM_C504580CA	2	1	3636511	1	3636968
CC	GO:0000776	kinetochore	1/122	15/970	0.868923	1	3635656	ASK1	1	1	3635656	0
CC	GO:0000793	condensed chromosome	1/122	15/970	0.868923	1	3635656	ASK1	1	1	3635656	0
CC	GO:0031410	cytoplasmic vesicle	1/122	15/970	0.868923	1	3636511	CAALFM_C504580CA	1	1	3636511	0
CC	GO:0031982	vesicle	1/122	15/970	0.868923	1	3636511	CAALFM_C504580CA	1	1	3636511	0
CC	GO:0044433	cytoplasmic vesicle part	1/122	15/970	0.868923	1	3636511	CAALFM_C504580CA	1	1	3636511	0
CC	GO:0097708	intracellular vesicle	1/122	15/970	0.868923	1	3636511	CAALFM_C504580CA	1	1	3636511	0
CC	GO:0000775	chromosome, centromeric region	1/122	16/970	0.885668	1	3635656	ASK1	1	1	3635656	0
CC	GO:0044455	mitochondrial membrane part	1/122	16/970	0.885668	1	3639233	QCR7	1	0		1	3639233
CC	GO:0031967	organelle envelope	3/122	39/970	0.88889	1	3639233/3636968/3645351	QCR7/TOM40/NUP84	3	1	3645351	2	3639233/3636968
CC	GO:0031975	envelope	3/122	39/970	0.88889	1	3639233/3636968/3645351	QCR7/TOM40/NUP84	3	1	3645351	2	3639233/3636968
CC	GO:0031966	mitochondrial membrane	2/122	29/970	0.898642	1	3639233/3636968	QCR7/TOM40	2	0		2	3639233/3636968
CC	GO:0030117	membrane coat	1/122	17/970	0.900289	1	3645870	SEC27	1	0		1	3645870
CC	GO:0048475	coated membrane	1/122	17/970	0.900289	1	3645870	SEC27	1	0		1	3645870
CC	GO:0098687	chromosomal region	1/122	17/970	0.900289	1	3635656	ASK1	1	1	3635656	0
CC	GO:0005740	mitochondrial envelope	2/122	30/970	0.909223	1	3639233/3636968	QCR7/TOM40	2	0		2	3639233/3636968
CC	GO:0098798	mitochondrial protein complex	1/122	18/970	0.913054	1	3639233	QCR7	1	0		1	3639233
CC	GO:0044454	nuclear chromosome part	1/122	19/970	0.924196	1	3635656	ASK1	1	1	3635656	0
CC	GO:0000228	nuclear chromosome	1/122	21/970	0.942407	1	3635656	ASK1	1	1	3635656	0
CC	GO:0005743	mitochondrial inner membrane	1/122	21/970	0.942407	1	3639233	QCR7	1	0		1	3639233
CC	GO:0019866	organelle inner membrane	1/122	21/970	0.942407	1	3639233	QCR7	1	0		1	3639233
CC	GO:0043227	membrane-bounded organelle	37/122	352/970	0.942589	1	3641635/3636434/30515358/3637920/3640307/3643103/3643735/3642793/3641244/3643757/3635671/3639233/3636968/3635656/3648000/3641607/3645762/3637849/3642019/3636457/3637706/3641886/3647713/3635840/3640208/3645874/3645351/3637727/3634947/3637862/3641183/3636535/3641370/3637401/3638399/3639350/3636511	ZCF18/SFL2/HHO1/RGT1/ORM1/MAM33/CCN1/CAALFM_C406440CA/GAL4/HAL9/CYT2/QCR7/TOM40/ASK1/ECM22/CAALFM_C601370WA/ZCF21/CAALFM_C402420CA/CAALFM_C112280CA/TIP20/SUT1/UGA33/CAALFM_C209460CA/CLB2/STB5/CAALFM_C602300CA/NUP84/ZCF22/CTA8/ARG83/CAALFM_C404180CA/PPR1/ZCF29/CAALFM_C203800CA/CAALFM_C303100CA/ROT1/CAALFM_C504580CA	37	24	3636434/30515358/3637920/3643735/3642793/3641244/3643757/3635656/3648000/3645762/3636457/3637706/3647713/3635840/3645351/3637727/3634947/3637862/3636535/3641370/3637401/3638399/3639350/3636511	13	3641635/3640307/3643103/3635671/3639233/3636968/3641607/3637849/3642019/3641886/3640208/3645874/3641183
CC	GO:0043231	intracellular membrane-bounded organelle	36/122	344/970	0.943459	1	3641635/3636434/30515358/3637920/3640307/3643103/3643735/3642793/3641244/3643757/3635671/3639233/3636968/3635656/3648000/3641607/3645762/3637849/3642019/3636457/3637706/3641886/3647713/3635840/3640208/3645874/3645351/3637727/3634947/3637862/3641183/3636535/3641370/3637401/3638399/3639350	ZCF18/SFL2/HHO1/RGT1/ORM1/MAM33/CCN1/CAALFM_C406440CA/GAL4/HAL9/CYT2/QCR7/TOM40/ASK1/ECM22/CAALFM_C601370WA/ZCF21/CAALFM_C402420CA/CAALFM_C112280CA/TIP20/SUT1/UGA33/CAALFM_C209460CA/CLB2/STB5/CAALFM_C602300CA/NUP84/ZCF22/CTA8/ARG83/CAALFM_C404180CA/PPR1/ZCF29/CAALFM_C203800CA/CAALFM_C303100CA/ROT1	36	23	3636434/30515358/3637920/3643735/3642793/3641244/3643757/3635656/3648000/3645762/3636457/3637706/3647713/3635840/3645351/3637727/3634947/3637862/3636535/3641370/3637401/3638399/3639350	13	3641635/3640307/3643103/3635671/3639233/3636968/3641607/3637849/3642019/3641886/3640208/3645874/3641183
CC	GO:1902494	catalytic complex	5/122	71/970	0.959119	1	3635164/3639233/3645874/3635236/3638399	CAALFM_C304970CA/QCR7/CAALFM_C602300CA/DYN1/CAALFM_C303100CA	5	2	3635236/3638399	3	3635164/3639233/3645874
CC	GO:0043228	non-membrane-bounded organelle	13/122	152/970	0.965787	1	3647326/30515358/3644707/3644716/3644715/3645659/3635656/3645658/3646043/3638322/3635236/3636415/3639723	HHT2/HHO1/HHT21/CAALFM_C104180WA/HTA2/HTB1/ASK1/HTA1/ARC15/HTA3/DYN1/CAALFM_C504890CA/CAALFM_CR00490WA	13	12	3647326/30515358/3644707/3644716/3644715/3645659/3635656/3645658/3646043/3638322/3635236/3636415	1	3639723
CC	GO:0043232	intracellular non-membrane-bounded organelle	13/122	152/970	0.965787	1	3647326/30515358/3644707/3644716/3644715/3645659/3635656/3645658/3646043/3638322/3635236/3636415/3639723	HHT2/HHO1/HHT21/CAALFM_C104180WA/HTA2/HTB1/ASK1/HTA1/ARC15/HTA3/DYN1/CAALFM_C504890CA/CAALFM_CR00490WA	13	12	3647326/30515358/3644707/3644716/3644715/3645659/3635656/3645658/3646043/3638322/3635236/3636415	1	3639723
CC	GO:0005634	nucleus	23/122	247/970	0.974209	1	3641635/3636434/30515358/3637920/3643735/3641244/3643757/3635656/3648000/3645762/3637706/3641886/3647713/3635840/3640208/3645874/3645351/3637727/3634947/3637862/3636535/3641370/3638399	ZCF18/SFL2/HHO1/RGT1/CCN1/GAL4/HAL9/ASK1/ECM22/ZCF21/SUT1/UGA33/CAALFM_C209460CA/CLB2/STB5/CAALFM_C602300CA/NUP84/ZCF22/CTA8/ARG83/PPR1/ZCF29/CAALFM_C303100CA	23	19	3636434/30515358/3637920/3643735/3641244/3643757/3635656/3648000/3645762/3637706/3647713/3635840/3645351/3637727/3634947/3637862/3636535/3641370/3638399	4	3641635/3641886/3640208/3645874
CC	GO:0005737	cytoplasm	22/122	244/970	0.982324	1	3640307/3640285/3643103/3647897/3645870/3642793/3648085/3635671/3639233/3636968/3641607/3636455/3637849/3642019/3636457/3638335/3638390/3641183/3639723/3637401/3639350/3636511	ORM1/ALA1/MAM33/HET1/SEC27/CAALFM_C406440CA/CAALFM_C406130WA/CYT2/QCR7/TOM40/CAALFM_C601370WA/CAALFM_C504290CA/CAALFM_C402420CA/CAALFM_C112280CA/TIP20/CAALFM_C302880WA/DTD2/CAALFM_C404180CA/CAALFM_CR00490WA/CAALFM_C203800CA/ROT1/CAALFM_C504580CA	22	8	3642793/3648085/3636455/3636457/3638335/3637401/3639350/3636511	14	3640307/3640285/3643103/3647897/3645870/3635671/3639233/3636968/3641607/3637849/3642019/3638390/3641183/3639723
CC	GO:0043226	organelle	48/122	470/970	0.98803	1	3641635/3636434/3647326/30515358/3637920/3640307/3644707/3644716/3643103/3643735/3644715/3642793/3645659/3641244/3643757/3635671/3639233/3636968/3635656/3648000/3641607/3645658/3645762/3646043/3637849/3642019/3636457/3637706/3641886/3647713/3635840/3640208/3638322/3645874/3645351/3635236/3637727/3636415/3634947/3637862/3641183/3636535/3639723/3641370/3637401/3638399/3639350/3636511	ZCF18/SFL2/HHT2/HHO1/RGT1/ORM1/HHT21/CAALFM_C104180WA/MAM33/CCN1/HTA2/CAALFM_C406440CA/HTB1/GAL4/HAL9/CYT2/QCR7/TOM40/ASK1/ECM22/CAALFM_C601370WA/HTA1/ZCF21/ARC15/CAALFM_C402420CA/CAALFM_C112280CA/TIP20/SUT1/UGA33/CAALFM_C209460CA/CLB2/STB5/HTA3/CAALFM_C602300CA/NUP84/DYN1/ZCF22/CAALFM_C504890CA/CTA8/ARG83/CAALFM_C404180CA/PPR1/CAALFM_CR00490WA/ZCF29/CAALFM_C203800CA/CAALFM_C303100CA/ROT1/CAALFM_…	48	34	3636434/3647326/30515358/3637920/3644707/3644716/3643735/3644715/3642793/3645659/3641244/3643757/3635656/3648000/3645658/3645762/3646043/3636457/3637706/3647713/3635840/3638322/3645351/3635236/3637727/3636415/3634947/3637862/3636535/3641370/3637401/3638399/3639350/3636511	14	3641635/3640307/3643103/3635671/3639233/3636968/3641607/3637849/3642019/3641886/3640208/3645874/3641183/3639723
CC	GO:0043229	intracellular organelle	48/122	470/970	0.98803	1	3641635/3636434/3647326/30515358/3637920/3640307/3644707/3644716/3643103/3643735/3644715/3642793/3645659/3641244/3643757/3635671/3639233/3636968/3635656/3648000/3641607/3645658/3645762/3646043/3637849/3642019/3636457/3637706/3641886/3647713/3635840/3640208/3638322/3645874/3645351/3635236/3637727/3636415/3634947/3637862/3641183/3636535/3639723/3641370/3637401/3638399/3639350/3636511	ZCF18/SFL2/HHT2/HHO1/RGT1/ORM1/HHT21/CAALFM_C104180WA/MAM33/CCN1/HTA2/CAALFM_C406440CA/HTB1/GAL4/HAL9/CYT2/QCR7/TOM40/ASK1/ECM22/CAALFM_C601370WA/HTA1/ZCF21/ARC15/CAALFM_C402420CA/CAALFM_C112280CA/TIP20/SUT1/UGA33/CAALFM_C209460CA/CLB2/STB5/HTA3/CAALFM_C602300CA/NUP84/DYN1/ZCF22/CAALFM_C504890CA/CTA8/ARG83/CAALFM_C404180CA/PPR1/CAALFM_CR00490WA/ZCF29/CAALFM_C203800CA/CAALFM_C303100CA/ROT1/CAALFM_…	48	34	3636434/3647326/30515358/3637920/3644707/3644716/3643735/3644715/3642793/3645659/3641244/3643757/3635656/3648000/3645658/3645762/3646043/3636457/3637706/3647713/3635840/3638322/3645351/3635236/3637727/3636415/3634947/3637862/3636535/3641370/3637401/3638399/3639350/3636511	14	3641635/3640307/3643103/3635671/3639233/3636968/3641607/3637849/3642019/3641886/3640208/3645874/3641183/3639723
CC	GO:0044444	cytoplasmic part	17/122	208/970	0.991052	1	3640307/3643103/3645870/3642793/3648085/3635671/3639233/3636968/3641607/3637849/3642019/3636457/3641183/3639723/3637401/3639350/3636511	ORM1/MAM33/SEC27/CAALFM_C406440CA/CAALFM_C406130WA/CYT2/QCR7/TOM40/CAALFM_C601370WA/CAALFM_C402420CA/CAALFM_C112280CA/TIP20/CAALFM_C404180CA/CAALFM_CR00490WA/CAALFM_C203800CA/ROT1/CAALFM_C504580CA	17	6	3642793/3648085/3636457/3637401/3639350/3636511	11	3640307/3643103/3645870/3635671/3639233/3636968/3641607/3637849/3642019/3641183/3639723
CC	GO:0098796	membrane protein complex	3/122	65/970	0.992917	1	3645870/3639233/3636511	SEC27/QCR7/CAALFM_C504580CA	3	1	3636511	2	3645870/3639233
CC	GO:0031974	membrane-enclosed lumen	3/122	71/970	0.99647	1	3643103/3635656/3638399	MAM33/ASK1/CAALFM_C303100CA	3	2	3635656/3638399	1	3643103
CC	GO:0043233	organelle lumen	3/122	71/970	0.99647	1	3643103/3635656/3638399	MAM33/ASK1/CAALFM_C303100CA	3	2	3635656/3638399	1	3643103
CC	GO:0070013	intracellular organelle lumen	3/122	71/970	0.99647	1	3643103/3635656/3638399	MAM33/ASK1/CAALFM_C303100CA	3	2	3635656/3638399	1	3643103
CC	GO:0005654	nucleoplasm	1/122	42/970	0.996903	1	3638399	CAALFM_C303100CA	1	1	3638399	0
CC	GO:0044451	nucleoplasm part	1/122	42/970	0.996903	1	3638399	CAALFM_C303100CA	1	1	3638399	0
CC	GO:0044428	nuclear part	4/122	88/970	0.997807	1	3635656/3645874/3645351/3638399	ASK1/CAALFM_C602300CA/NUP84/CAALFM_C303100CA	4	3	3635656/3645351/3638399	1	3645874
CC	GO:0031981	nuclear lumen	2/122	67/970	0.999005	1	3635656/3638399	ASK1/CAALFM_C303100CA	2	2	3635656/3638399	0
CC	GO:0005840	ribosome	1/122	82/970	0.99999	1	3639723	CAALFM_CR00490WA	1	0		1	3639723
CC	GO:0032991	protein-containing complex	21/122	328/970	0.999996	1	3647326/30515358/3644707/3644716/3645870/3644715/3645659/3635164/3639233/3647604/3635656/3645658/3646043/3638322/3645874/3645351/3635236/3636415/3639723/3638399/3636511	HHT2/HHO1/HHT21/CAALFM_C104180WA/SEC27/HTA2/HTB1/CAALFM_C304970CA/QCR7/CAALFM_C112570CA/ASK1/HTA1/ARC15/HTA3/CAALFM_C602300CA/NUP84/DYN1/CAALFM_C504890CA/CAALFM_CR00490WA/CAALFM_C303100CA/CAALFM_C504580CA	21	16	3647326/30515358/3644707/3644716/3644715/3645659/3647604/3635656/3645658/3646043/3638322/3645351/3635236/3636415/3638399/3636511	5	3645870/3635164/3639233/3645874/3639723
CC	GO:1990904	ribonucleoprotein complex	1/122	103/970	1	1	3639723	CAALFM_CR00490WA	1	0		1	3639723
MF	GO:0046983	protein dimerization activity	16/324	46/2491	0.000115179	0.0176224	3647326/3647327/3644707/3636203/3644716/3635629/3644423/3644715/3644705/3645659/3637833/3641570/3645658/3638322/3635826/3647693	HHT2/HHF22/HHT21/TYE7/CAALFM_C104180WA/HAP3/RTG3/HTA2/HHF1/HTB1/HFL2/HMS1/HTA1/HTA3/HOM2/RPC19	16	15	3647326/3647327/3644707/3636203/3644716/3635629/3644423/3644715/3644705/3645659/3637833/3641570/3645658/3638322/3647693	1	3635826
MF	GO:0046982	protein heterodimerization activity	11/324	27/2491	0.000285844	0.0218671	3647326/3647327/3644707/3644716/3635629/3644715/3644705/3645659/3637833/3645658/3638322	HHT2/HHF22/HHT21/CAALFM_C104180WA/HAP3/HTA2/HHF1/HTB1/HFL2/HTA1/HTA3	11	11	3647326/3647327/3644707/3644716/3635629/3644715/3644705/3645659/3637833/3645658/3638322	0
MF	GO:0052689	carboxylic ester hydrolase activity	7/324	24/2491	0.0284163	0.825476	3640275/3634797/3645987/3634854/3645956/3638335/3638390	NAM2/LIP3/LIP4/LIP2/ILS1/CAALFM_C302880WA/DTD2	7	3	3634797/3634854/3638335	4	3640275/3645987/3645956/3638390
MF	GO:0016788	hydrolase activity, acting on ester bonds	20/324	102/2491	0.0355376	0.825476	3639237/3640275/3634797/3645987/3636408/3634854/3647179/3647858/3645956/3642985/3636877/3637713/3638335/3647079/3638390/3636505/3639238/3644561/3644562/3635724	RNH1/NAM2/LIP3/LIP4/RNY11/LIP2/PHO8/PTP2/ILS1/PLC2/PDE2/PDE1/CAALFM_C302880WA/CAALFM_C600770CA/DTD2/GDE1/CAALFM_C602880WA/PLB1/PLB2/PLB4.5	20	12	3634797/3636408/3634854/3647179/3647858/3642985/3636877/3637713/3638335/3636505/3644561/3635724	8	3639237/3640275/3645987/3645956/3647079/3638390/3639238/3644562
MF	GO:0016298	lipase activity	6/324	20/2491	0.0364321	0.825476	3634797/3645987/3634854/3644561/3644562/3635724	LIP3/LIP4/LIP2/PLB1/PLB2/PLB4.5	6	4	3634797/3634854/3644561/3635724	2	3645987/3644562
MF	GO:0043565	sequence-specific DNA binding	6/324	20/2491	0.0364321	0.825476	3636434/3642563/3636453/3635819/3634947/3640171	SFL2/GZF3/GLN3/CAALFM_C202530WA/CTA8/MBF1	6	5	3636434/3642563/3636453/3635819/3634947	1	3640171
MF	GO:0043169	cation binding	44/324	263/2491	0.0388472	0.825476	3640295/3641635/3647153/3635693/3637920/3634826/3637342/3647320/3638884/3638899/3641244/3643299/3639236/3636874/3639700/3643757/3647131/3641397/3648000/3641632/3635716/3642563/3645762/3646424/3636552/3644476/3637426/3637706/3635184/3636453/3641886/3647713/3642582/3640208/3635819/3641938/3637727/3642244/30515248/3637862/3636535/3641370/3645025/3637871	CAALFM_C603600CA/ZCF18/FET3/CAALFM_C402230CA/RGT1/CRP1/ADAEC/ARO10/CAALFM_C200700WA/SOD6/GAL4/CAALFM_C114450CA/STE23/RAD16/ALK2/HAL9/FET34/CAALFM_C702860CA/ECM22/FPG1/ERG251/GZF3/ZCF21/CAALFM_C103990WA/ILV2/CCS1/CAALFM_C203910CA/SUT1/AFP99/GLN3/UGA33/CAALFM_C209460CA/CAALFM_CR02780WA/STB5/CAALFM_C202530WA/AXL1/ZCF22/CYM1/SOD1/ARG83/PPR1/ZCF29/HIS4/UBR1	44	26	3640295/3635693/3637920/3634826/3637342/3647320/3638899/3641244/3639700/3643757/3648000/3635716/3642563/3645762/3637706/3635184/3636453/3647713/3642582/3635819/3641938/3637727/30515248/3637862/3636535/3641370	18	3641635/3647153/3638884/3643299/3639236/3636874/3647131/3641397/3641632/3646424/3636552/3644476/3637426/3641886/3640208/3642244/3645025/3637871
MF	GO:0016831	carboxy-lyase activity	4/324	2491-11-01	0.043935	0.825476	3644116/3640297/3636649/3641233	SPE2/CAALFM_C603620CA/URA3/CAALFM_C210860CA	4	2	3644116/3636649	2	3640297/3641233
MF	GO:0046872	metal ion binding	43/324	261/2491	0.0511299	0.825476	3640295/3641635/3647153/3635693/3637920/3634826/3637342/3638884/3638899/3641244/3643299/3639236/3636874/3639700/3643757/3647131/3641397/3648000/3641632/3635716/3642563/3645762/3646424/3636552/3644476/3637426/3637706/3635184/3636453/3641886/3647713/3642582/3640208/3635819/3641938/3637727/3642244/30515248/3637862/3636535/3641370/3645025/3637871	CAALFM_C603600CA/ZCF18/FET3/CAALFM_C402230CA/RGT1/CRP1/ADAEC/CAALFM_C200700WA/SOD6/GAL4/CAALFM_C114450CA/STE23/RAD16/ALK2/HAL9/FET34/CAALFM_C702860CA/ECM22/FPG1/ERG251/GZF3/ZCF21/CAALFM_C103990WA/ILV2/CCS1/CAALFM_C203910CA/SUT1/AFP99/GLN3/UGA33/CAALFM_C209460CA/CAALFM_CR02780WA/STB5/CAALFM_C202530WA/AXL1/ZCF22/CYM1/SOD1/ARG83/PPR1/ZCF29/HIS4/UBR1	43	25	3640295/3635693/3637920/3634826/3637342/3638899/3641244/3639700/3643757/3648000/3635716/3642563/3645762/3637706/3635184/3636453/3647713/3642582/3635819/3641938/3637727/30515248/3637862/3636535/3641370	18	3641635/3647153/3638884/3643299/3639236/3636874/3647131/3641397/3641632/3646424/3636552/3644476/3637426/3641886/3640208/3642244/3645025/3637871
MF	GO:0016491	oxidoreductase activity	41/324	249/2491	0.056616	0.825476	3644012/3640295/3647233/3644060/3648031/3647153/3648032/3635693/3639205/3647071/3643520/3643778/3638532/3644010/3642612/3642919/3634945/3643654/3643909/3639700/3647131/3642639/3646660/3641618/3642989/3635716/3637751/3638382/3647407/3643890/3643924/3642921/3642494/3641195/3647318/3635826/3644127/3644077/3645025/3638393/3647561	ILV5/CAALFM_C603600CA/CAALFM_C503770CA/EBP1/PST3/FET3/YCP4/CAALFM_C402230CA/CAALFM_C602560WA/COX15/PST1/SMM1/PRO2/CAALFM_C600850WA/CFL5/OYE32/AOX2/CAALFM_C305640WA/PST2/ALK2/FET34/CFL4/CAALFM_C107630WA/OYE23/RNR1/ERG251/CAALFM_C502920WA/MET13/ALD6/CAALFM_C208850CA/GPD1/GUT2/TRP99/CAALFM_C210460CA/CAALFM_CR06870CA/HOM2/CAALFM_C500810CA/ECM17/HIS4/AIP2/MCR1	41	21	3640295/3647233/3648031/3648032/3635693/3643520/3643778/3642612/3634945/3643654/3643909/3639700/3642639/3635716/3637751/3647407/3643890/3643924/3642921/3647318/3644127	20	3644012/3644060/3647153/3639205/3647071/3638532/3644010/3642919/3647131/3646660/3641618/3642989/3638382/3642494/3641195/3635826/3644077/3645025/3638393/3647561
MF	GO:0008237	metallopeptidase activity	4/324	2491-12-01	0.059348	0.825476	3638884/3646074/3636589/3645040	CAALFM_C200700WA/CAALFM_C600340CA/AFG3/STE24	4	0		4	3638884/3646074/3636589/3645040
MF	GO:0051287	NAD binding	6/324	23/2491	0.0679674	0.834305	3647233/3639239/3643890/3643924/3635826/3645025	CAALFM_C503770CA/HPD1/CAALFM_C208850CA/GPD1/HOM2/HIS4	6	4	3647233/3639239/3643890/3643924	2	3635826/3645025
MF	GO:0046914	transition metal ion binding	32/324	192/2491	0.0756122	0.834305	3640295/3641635/3647153/3635693/3637920/3637342/3638884/3641244/3643299/3639700/3643757/3647131/3641397/3648000/3641632/3635716/3642563/3645762/3646424/3637706/3636453/3641886/3647713/3642582/3640208/3635819/3637727/3637862/3636535/3641370/3645025/3637871	CAALFM_C603600CA/ZCF18/FET3/CAALFM_C402230CA/RGT1/ADAEC/CAALFM_C200700WA/GAL4/CAALFM_C114450CA/ALK2/HAL9/FET34/CAALFM_C702860CA/ECM22/FPG1/ERG251/GZF3/ZCF21/CAALFM_C103990WA/SUT1/GLN3/UGA33/CAALFM_C209460CA/CAALFM_CR02780WA/STB5/CAALFM_C202530WA/ZCF22/ARG83/PPR1/ZCF29/HIS4/UBR1	32	20	3640295/3635693/3637920/3637342/3641244/3639700/3643757/3648000/3635716/3642563/3645762/3637706/3636453/3647713/3642582/3635819/3637727/3637862/3636535/3641370	12	3641635/3647153/3638884/3643299/3647131/3641397/3641632/3646424/3641886/3640208/3645025/3637871
MF	GO:0003677	DNA binding	31/324	187/2491	0.0842264	0.834305	3637952/3641553/3636434/3647326/30515358/3644707/3644716/3637342/3644715/3645016/3645659/3636950/3645363/3643779/3638014/3641632/3642563/3645658/3643106/3644145/3636453/3640208/3635819/3638322/3636492/3647079/3634947/3638991/3636535/3640171/3646667	YOX1/CAALFM_C500380WA/SFL2/HHT2/HHO1/HHT21/CAALFM_C104180WA/ADAEC/HTA2/CAALFM_C400390WA/HTB1/CUP9/CAALFM_C403680CA/CAALFM_C209880CA/RAD3/FPG1/GZF3/HTA1/OGG1/EFG1/GLN3/STB5/CAALFM_C202530WA/HTA3/GRF10/CAALFM_C600770CA/CTA8/RPO21/PPR1/MBF1/CAALFM_C107480CA	31	22	3637952/3641553/3636434/3647326/30515358/3644707/3644716/3637342/3644715/3645659/3636950/3643779/3642563/3645658/3644145/3636453/3635819/3638322/3636492/3634947/3636535/3646667	9	3645016/3645363/3638014/3641632/3643106/3640208/3647079/3638991/3640171
MF	GO:0005543	phospholipid binding	5/324	19/2491	0.0898018	0.834305	3648085/3637816/3635627/3639199/3645350	CAALFM_C406130WA/CAALFM_C502980CA/BEM1/CAALFM_C603330CA/CAALFM_C403810WA	5	4	3648085/3637816/3635627/3645350	1	3639199
MF	GO:0008289	lipid binding	5/324	19/2491	0.0898018	0.834305	3648085/3637816/3635627/3639199/3645350	CAALFM_C406130WA/CAALFM_C502980CA/BEM1/CAALFM_C603330CA/CAALFM_C403810WA	5	4	3648085/3637816/3635627/3645350	1	3639199
MF	GO:0016829	lyase activity	8/324	37/2491	0.0979653	0.834305	3644116/3640297/3636649/3635671/3647777/3642582/3645211/3641233	SPE2/CAALFM_C603620CA/URA3/CYT2/HIS3/CAALFM_CR02780WA/HEM15/CAALFM_C210860CA	8	3	3644116/3636649/3642582	5	3640297/3635671/3647777/3645211/3641233
MF	GO:0016787	hydrolase activity	58/324	383/2491	0.103622	0.834305	3639237/3635718/3640275/3634797/3637905/3642656/3645987/3643295/3636408/3639360/3637930/3640238/3642933/3634854/3638884/3646074/3647179/3647858/3645956/3636123/3643160/3636589/3643299/3646284/3640713/3640999/3638014/3636837/3641632/3642985/3636797/3643106/3639558/3636404/3636877/3637426/3647087/3637713/3638335/3639317/3643193/3647079/3635236/3638390/3636505/3639238/3636812/3641389/3644483/3636665…	RNH1/CAALFM_C400850CA/NAM2/LIP3/CRH11/VPS1/LIP4/DDI1/RNY11/TUF1/CAALFM_C403050CA/CRL1/CAALFM_C406910WA/LIP2/CAALFM_C200700WA/CAALFM_C600340CA/PHO8/PTP2/ILS1/CAALFM_C113060CA/CAALFM_C704260WA/AFG3/CAALFM_C114450CA/ATM1/FUN12/PIM1/RAD3/XOG1/FPG1/PLC2/SCW4/OGG1/CAALFM_C106390WA/PRP22/PDE2/CAALFM_C203910CA/PCD1/PDE1/CAALFM_C302880WA/UBP6/PPH3/CAALFM_C600770CA/DYN1/DTD2/GDE1/CAALFM_C602880WA/SNO1/IFM1…	58	26	3635718/3634797/3637905/3642656/3636408/3637930/3640238/3642933/3634854/3647179/3647858/3636837/3642985/3636797/3636404/3636877/3647087/3637713/3638335/3635236/3636505/3636812/3644483/3644561/3635724/3646667	32	3639237/3640275/3645987/3643295/3639360/3638884/3646074/3645956/3636123/3643160/3636589/3643299/3646284/3640713/3640999/3638014/3641632/3643106/3639558/3637426/3639317/3643193/3647079/3638390/3639238/3641389/3636665/3644562/3647993/3645040/3639256/3645025
MF	GO:0003700	DNA binding transcription factor activity	18/324	102/2491	0.104583	0.834305	3641635/3636434/3637920/3641244/3643757/3648000/3645762/3637706/3641886/3647713/3640208/3637727/3643823/3634947/3637862/3636535/3641370/3639303	ZCF18/SFL2/RGT1/GAL4/HAL9/ECM22/ZCF21/SUT1/UGA33/CAALFM_C209460CA/STB5/ZCF22/GCN4/CTA8/ARG83/PPR1/ZCF29/RCA1	18	14	3636434/3637920/3641244/3643757/3648000/3645762/3637706/3647713/3637727/3643823/3634947/3637862/3636535/3641370	4	3641635/3641886/3640208/3639303
MF	GO:0016798	hydrolase activity, acting on glycosyl bonds	6/324	26/2491	0.111452	0.834305	3637905/3636837/3641632/3636797/3643106/3637426	CRH11/XOG1/FPG1/SCW4/OGG1/CAALFM_C203910CA	6	3	3637905/3636837/3636797	3	3641632/3643106/3637426
MF	GO:0008270	zinc ion binding	25/324	151/2491	0.114529	0.834305	3641635/3637920/3637342/3638884/3641244/3643757/3641397/3648000/3641632/3642563/3645762/3646424/3637706/3636453/3641886/3647713/3642582/3640208/3635819/3637727/3637862/3636535/3641370/3645025/3637871	ZCF18/RGT1/ADAEC/CAALFM_C200700WA/GAL4/HAL9/CAALFM_C702860CA/ECM22/FPG1/GZF3/ZCF21/CAALFM_C103990WA/SUT1/GLN3/UGA33/CAALFM_C209460CA/CAALFM_CR02780WA/STB5/CAALFM_C202530WA/ZCF22/ARG83/PPR1/ZCF29/HIS4/UBR1	25	16	3637920/3637342/3641244/3643757/3648000/3642563/3645762/3637706/3636453/3647713/3642582/3635819/3637727/3637862/3636535/3641370	9	3641635/3638884/3641397/3641632/3646424/3641886/3640208/3645025/3637871
MF	GO:0016830	carbon-carbon lyase activity	4/324	15/2491	0.119965	0.834305	3644116/3640297/3636649/3641233	SPE2/CAALFM_C603620CA/URA3/CAALFM_C210860CA	4	2	3644116/3636649	2	3640297/3641233
MF	GO:0010181	FMN binding	4/324	16/2491	0.144409	0.904487	3644060/3642919/3641618/3644077	EBP1/OYE32/OYE23/ECM17	4	0		4	3644060/3642919/3641618/3644077
MF	GO:0035091	phosphatidylinositol binding	4/324	16/2491	0.144409	0.904487	3637816/3635627/3639199/3645350	CAALFM_C502980CA/BEM1/CAALFM_C603330CA/CAALFM_C403810WA	4	3	3637816/3635627/3645350	1	3639199
MF	GO:0046873	metal ion transmembrane transporter activity	5/324	22/2491	0.147792	0.904487	3639546/3647441/3648427/3635752/3636616	HAK1/MID1/CTR2/CAALFM_C202180WA/ALR1	5	5	3639546/3647441/3648427/3635752/3636616	0
MF	GO:0000981	RNA polymerase II transcription factor activity, sequence-specific DNA binding	14/324	81/2491	0.15913	0.907034	3641635/3637920/3641244/3643757/3648000/3645762/3637706/3641886/3647713/3640208/3637727/3637862/3636535/3641370	ZCF18/RGT1/GAL4/HAL9/ECM22/ZCF21/SUT1/UGA33/CAALFM_C209460CA/STB5/ZCF22/ARG83/PPR1/ZCF29	14	11	3637920/3641244/3643757/3648000/3645762/3637706/3647713/3637727/3637862/3636535/3641370	3	3641635/3641886/3640208
MF	GO:0003743	translation initiation factor activity	3/324	2491-11-01	0.163013	0.907034	3647730/3636455/3645426	SUI1/CAALFM_C504290CA/CAALFM_C101900CA	3	2	3647730/3636455	1	3645426
MF	GO:0042578	phosphoric ester hydrolase activity	6/324	29/2491	0.165993	0.907034	3647179/3647858/3642985/3636877/3637713/3636505	PHO8/PTP2/PLC2/PDE2/PDE1/GDE1	6	6	3647179/3647858/3642985/3636877/3637713/3636505	0
MF	GO:0140101	catalytic activity, acting on a tRNA	9/324	50/2491	0.193861	0.968307	3640275/3640285/3643778/3645956/3636824/3638335/3645124/3638390/3646086	NAM2/ALA1/SMM1/ILS1/FRS2/CAALFM_C302880WA/CAALFM_CR03110WA/DTD2/CAALFM_C600390WA	9	3	3643778/3636824/3638335	6	3640275/3640285/3645956/3645124/3638390/3646086
MF	GO:0008135	translation factor activity, RNA binding	4/324	18/2491	0.198297	0.968307	3647730/3636455/3642478/3645426	SUI1/CAALFM_C504290CA/CAALFM_C105400CA/CAALFM_C101900CA	4	2	3647730/3636455	2	3642478/3645426
MF	GO:0005215	transporter activity	23/324	151/2491	0.233572	0.968307	3638048/3642634/3636802/3647897/3642635/3642793/3640093/3646284/3643440/3646404/3643209/3640558/3639546/3639861/3645976/3647441/3648427/3636553/3637036/3635752/3636616/3647141/3639256	HGT12/GIT3/HNM4/HET1/GIT4/CAALFM_C406440CA/HNM3/ATM1/ITR1/HGT9/HXT5/HGT19/HAK1/PHO87/CAALFM_C604550CA/MID1/CTR2/MEP1/CAALFM_C701600WA/CAALFM_C202180WA/ALR1/NHX1/MDL2	23	15	3642634/3636802/3642635/3642793/3643440/3646404/3643209/3640558/3639546/3639861/3647441/3648427/3636553/3635752/3636616	8	3638048/3647897/3640093/3646284/3645976/3637036/3647141/3639256
MF	GO:0004806	triglyceride lipase activity	3/324	13/2491	0.233665	0.968307	3634797/3645987/3634854	LIP3/LIP4/LIP2	3	2	3634797/3634854	1	3645987
MF	GO:0050662	coenzyme binding	17/324	110/2491	0.256229	0.968307	3647344/3647233/3644060/3648026/3643778/3637744/3647320/3639239/3642919/3641618/3636552/3643890/3643924/3635826/3644077/3645025/3638393	CAALFM_CR07820WA/CAALFM_C503770CA/EBP1/GRE2/SMM1/GRP2/ARO10/HPD1/OYE32/OYE23/ILV2/CAALFM_C208850CA/GPD1/HOM2/ECM17/HIS4/AIP2	17	8	3647344/3647233/3643778/3637744/3647320/3639239/3643890/3643924	9	3644060/3648026/3642919/3641618/3636552/3635826/3644077/3645025/3638393
MF	GO:0020037	heme binding	4/324	20/2491	0.257138	0.968307	3640295/3639700/3644127/3644077	CAALFM_C603600CA/ALK2/CAALFM_C500810CA/ECM17	4	3	3640295/3639700/3644127	1	3644077
MF	GO:0046906	tetrapyrrole binding	4/324	20/2491	0.257138	0.968307	3640295/3639700/3644127/3644077	CAALFM_C603600CA/ALK2/CAALFM_C500810CA/ECM17	4	3	3640295/3639700/3644127	1	3644077
MF	GO:0004812	aminoacyl-tRNA ligase activity	6/324	34/2491	0.27563	0.968307	3640275/3640285/3645956/3636824/3645124/3646086	NAM2/ALA1/ILS1/FRS2/CAALFM_CR03110WA/CAALFM_C600390WA	6	1	3636824	5	3640275/3640285/3645956/3645124/3646086
MF	GO:0016875	ligase activity, forming carbon-oxygen bonds	6/324	34/2491	0.27563	0.968307	3640275/3640285/3645956/3636824/3645124/3646086	NAM2/ALA1/ILS1/FRS2/CAALFM_CR03110WA/CAALFM_C600390WA	6	1	3636824	5	3640275/3640285/3645956/3645124/3646086
MF	GO:0000030	mannosyltransferase activity	4/324	21/2491	0.287768	0.968307	3639182/3638357/3647531/3636585	BMT4/BMT7/RHD1/MNT1	4	3	3639182/3638357/3647531	1	3636585
MF	GO:0004175	endopeptidase activity	6/324	35/2491	0.299443	0.968307	3643295/3638884/3646074/3636589/3640999/3645040	DDI1/CAALFM_C200700WA/CAALFM_C600340CA/AFG3/PIM1/STE24	6	0		6	3643295/3638884/3646074/3636589/3640999/3645040
MF	GO:0004521	endoribonuclease activity	3/324	15/2491	0.308507	0.968307	3639237/3636408/3639238	RNH1/RNY11/CAALFM_C602880WA	3	1	3636408	2	3639237/3639238
MF	GO:0003924	GTPase activity	7/324	44/2491	0.345217	0.968307	3642656/3639360/3640238/3636123/3643160/3640713/3641389	VPS1/TUF1/CRL1/CAALFM_C113060CA/CAALFM_C704260WA/FUN12/IFM1	7	2	3642656/3640238	5	3639360/3636123/3643160/3640713/3641389
MF	GO:0004553	hydrolase activity, hydrolyzing O-glycosyl compounds	4/324	23/2491	0.350224	0.968307	3637905/3636837/3636797/3637426	CRH11/XOG1/SCW4/CAALFM_C203910CA	4	3	3637905/3636837/3636797	1	3637426
MF	GO:0048037	cofactor binding	21/324	148/2491	0.367147	0.968307	3640295/3647344/3647233/3644060/3648026/3643778/3637744/3647320/3639239/3642919/3639700/3641618/3636552/3643890/3643924/3635826/3644127/3637893/3644077/3645025/3638393	CAALFM_C603600CA/CAALFM_CR07820WA/CAALFM_C503770CA/EBP1/GRE2/SMM1/GRP2/ARO10/HPD1/OYE32/ALK2/OYE23/ILV2/CAALFM_C208850CA/GPD1/HOM2/CAALFM_C500810CA/LAB5/ECM17/HIS4/AIP2	21	12	3640295/3647344/3647233/3643778/3637744/3647320/3639239/3639700/3643890/3643924/3644127/3637893	9	3644060/3648026/3642919/3641618/3636552/3635826/3644077/3645025/3638393
MF	GO:0140110	transcription regulator activity	18/324	126/2491	0.370972	0.968307	3641635/3636434/3637920/3641244/3643757/3648000/3645762/3637706/3641886/3647713/3640208/3637727/3643823/3634947/3637862/3636535/3641370/3639303	ZCF18/SFL2/RGT1/GAL4/HAL9/ECM22/ZCF21/SUT1/UGA33/CAALFM_C209460CA/STB5/ZCF22/GCN4/CTA8/ARG83/PPR1/ZCF29/RCA1	18	14	3636434/3637920/3641244/3643757/3648000/3645762/3637706/3647713/3637727/3643823/3634947/3637862/3636535/3641370	4	3641635/3641886/3640208/3639303
MF	GO:0016616	oxidoreductase activity, acting on the CH-OH group of donors, NAD or NADP as acceptor	5/324	31/2491	0.377445	0.968307	3644012/3647233/3643890/3643924/3645025	ILV5/CAALFM_C503770CA/CAALFM_C208850CA/GPD1/HIS4	5	3	3647233/3643890/3643924	2	3644012/3645025
MF	GO:0005507	copper ion binding	2/324	2491-10-01	0.380763	0.968307	3647153/3647131	FET3/FET34	2	0		2	3647153/3647131
MF	GO:0016684	oxidoreductase activity, acting on peroxide as acceptor	2/324	2491-10-01	0.380763	0.968307	3644010/3644127	CAALFM_C600850WA/CAALFM_C500810CA	2	1	3644127	1	3644010
MF	GO:0016893	endonuclease activity, active with either ribo- or deoxyribonucleic acids and producing 5'-phosphomonoesters	2/324	2491-10-01	0.380763	0.968307	3639237/3639238	RNH1/CAALFM_C602880WA	2	0		2	3639237/3639238
MF	GO:0005515	protein binding	60/324	445/2491	0.39615	0.968307	3647326/3647327/3636176/3646279/3644707/3647894/3643295/3636203/3644716/3642828/3635629/3645870/3644423/3644715/3639499/3644841/3644705/3638524/3648085/3645659/3637052/3636400/3641251/3635627/3637833/3643779/3641570/3637818/3644027/3647889/3636445/3641933/3640129/3643326/3645658/3643752/3641368/3646616/3640294/3640950/3636862/3634871/3639317/3643758/3647228/3638322/3639044/3641586/3639281/3638432…	HHT2/HHF22/CAALFM_C112830CA/CAALFM_C604280WA/HHT21/VID27/DDI1/TYE7/CAALFM_C104180WA/AGO1/HAP3/SEC27/RTG3/HTA2/CAALFM_C106340WA/SIS1/HHF1/TCC1/CAALFM_C406130WA/HTB1/IQG1/CAALFM_C505340WA/CAALFM_C210670WA/BEM1/HFL2/CAALFM_C209880CA/HMS1/CAALFM_C503000CA/PEX7/CAALFM_C500060CA/ASH2/CAALFM_CR09410WA/CAALFM_CR01700CA/CAALFM_C114460WA/HTA1/CAALFM_C501870WA/CAALFM_C703240WA/CAALFM_CR06740WA/SKI8/CAALFM_C…	60	47	3647326/3647327/3636176/3644707/3636203/3644716/3642828/3635629/3644423/3644715/3639499/3644841/3644705/3638524/3648085/3645659/3637052/3636400/3635627/3637833/3643779/3641570/3637818/3647889/3636445/3641933/3640129/3645658/3643752/3641368/3646616/3640950/3636862/3643758/3647228/3638322/3639044/3641586/3639281/3638432/3647315/3645014/3647693/3638518/3646361/3640202/3647733	13	3646279/3647894/3643295/3645870/3641251/3644027/3643326/3640294/3634871/3639317/3641623/3635826/3645026
MF	GO:0004672	protein kinase activity	14/324	99/2491	0.411629	0.968307	3644836/3634866/3637799/3644580/3647801/3636228/3646075/3648101/3636912/3636636/3639281/3639498/3643482/3647733	CAALFM_CR06040WA/SWE1/CAALFM_C503150WA/SHA3/YAK1/KNS1/PKH3/DBF2/CAALFM_C103470CA/CAALFM_C302260CA/CDC5/NPR1/TPK2/MEC1	14	11	3644836/3634866/3637799/3644580/3647801/3636228/3648101/3636912/3639281/3643482/3647733	3	3646075/3636636/3639498
MF	GO:0004519	endonuclease activity	3/324	18/2491	0.42119	0.968307	3639237/3636408/3639238	RNH1/RNY11/CAALFM_C602880WA	3	1	3636408	2	3639237/3639238
MF	GO:0022857	transmembrane transporter activity	20/324	145/2491	0.424735	0.968307	3638048/3642634/3636802/3642635/3642793/3640093/3646284/3643440/3646404/3643209/3640558/3639546/3645976/3647441/3648427/3636553/3635752/3636616/3647141/3639256	HGT12/GIT3/HNM4/GIT4/CAALFM_C406440CA/HNM3/ATM1/ITR1/HGT9/HXT5/HGT19/HAK1/CAALFM_C604550CA/MID1/CTR2/MEP1/CAALFM_C202180WA/ALR1/NHX1/MDL2	20	14	3642634/3636802/3642635/3642793/3643440/3646404/3643209/3640558/3639546/3647441/3648427/3636553/3635752/3636616	6	3638048/3640093/3646284/3645976/3647141/3639256
MF	GO:0016810	hydrolase activity, acting on carbon-nitrogen (but not peptide) bonds	2/324	2491-11-01	0.429152	0.968307	3636812/3645025	SNO1/HIS4	2	1	3636812	1	3645025
MF	GO:0016836	hydro-lyase activity	2/324	2491-11-01	0.429152	0.968307	3647777/3642582	HIS3/CAALFM_CR02780WA	2	1	3642582	1	3647777
MF	GO:0051082	unfolded protein binding	2/324	2491-11-01	0.429152	0.968307	3644841/3641623	SIS1/CAALFM_C601460CA	2	1	3644841	1	3641623
MF	GO:0016614	oxidoreductase activity, acting on CH-OH group of donors	5/324	33/2491	0.432069	0.968307	3644012/3647233/3643890/3643924/3645025	ILV5/CAALFM_C503770CA/CAALFM_C208850CA/GPD1/HIS4	5	3	3647233/3643890/3643924	2	3644012/3645025
MF	GO:0003676	nucleic acid binding	57/324	427/2491	0.434731	0.968307	3637952/3639237/3645725/3641553/3636434/3647326/30515358/3644707/3636408/3644716/3640285/3637342/3642828/3641722/3648193/3642464/3644715/3646280/3645016/3635700/3645659/3636950/3645363/3645033/3647730/3643779/3638014/3641632/3640129/3636824/3642563/3645658/3635203/3636455/3643106/3644145/3636404/3636414/3636453/3645124/3640208/3635819/3638322/3636492/3634911/3640698/3647079/3637704/3639238/363516…	YOX1/RNH1/CRZ2/CAALFM_C500380WA/SFL2/HHT2/HHO1/HHT21/RNY11/CAALFM_C104180WA/ALA1/ADAEC/AGO1/CRZ1/CAALFM_CR07680CA/CAALFM_C105220CA/HTA2/CAALFM_C604290WA/CAALFM_C400390WA/CAALFM_C401280CA/HTB1/CUP9/CAALFM_C403680CA/SUB2/SUI1/CAALFM_C209880CA/RAD3/FPG1/CAALFM_CR01700CA/FRS2/GZF3/HTA1/CAALFM_C305290CA/CAALFM_C504290CA/OGG1/EFG1/PRP22/CAALFM_C504470CA/GLN3/CAALFM_CR03110WA/STB5/CAALFM_C202530WA/HTA3/…	57	37	3637952/3645725/3641553/3636434/3647326/30515358/3644707/3636408/3644716/3637342/3642828/3641722/3648193/3644715/3635700/3645659/3636950/3647730/3643779/3640129/3636824/3642563/3645658/3635203/3636455/3644145/3636404/3636414/3636453/3635819/3638322/3636492/3634911/3637704/3634947/3636535/3646667	20	3639237/3640285/3642464/3646280/3645016/3645363/3645033/3638014/3641632/3643106/3645124/3640208/3640698/3647079/3639238/3635162/3642478/3638991/3640171/3645426
MF	GO:0022890	inorganic cation transmembrane transporter activity	6/324	41/2491	0.446439	0.968307	3639546/3647441/3648427/3635752/3636616/3647141	HAK1/MID1/CTR2/CAALFM_C202180WA/ALR1/NHX1	6	5	3639546/3647441/3648427/3635752/3636616	1	3647141
MF	GO:0016301	kinase activity	17/324	125/2491	0.461698	0.968307	3644836/3634866/3643784/3637799/3639192/3644580/3647801/3636228/3646075/3648101/3636912/3634895/3636636/3639281/3639498/3643482/3647733	CAALFM_CR06040WA/SWE1/IPK2/CAALFM_C503150WA/CAALFM_C602980CA/SHA3/YAK1/KNS1/PKH3/DBF2/CAALFM_C103470CA/DAK2/CAALFM_C302260CA/CDC5/NPR1/TPK2/MEC1	17	13	3644836/3634866/3643784/3637799/3639192/3644580/3647801/3636228/3648101/3636912/3639281/3643482/3647733	4	3646075/3634895/3636636/3639498
MF	GO:0005506	iron ion binding	4/324	27/2491	0.474029	0.968307	3640295/3635693/3639700/3635716	CAALFM_C603600CA/CAALFM_C402230CA/ALK2/ERG251	4	4	3640295/3635693/3639700/3635716	0
MF	GO:0016835	carbon-oxygen lyase activity	2/324	2491-12-01	0.475468	0.968307	3647777/3642582	HIS3/CAALFM_CR02780WA	2	1	3642582	1	3647777
MF	GO:0030695	GTPase regulator activity	2/324	2491-12-01	0.475468	0.968307	3643298/3646953	GDI1/TSC2	2	1	3646953	1	3643298
MF	GO:0008324	cation transmembrane transporter activity	7/324	50/2491	0.480125	0.968307	3639546/3647441/3648427/3636553/3635752/3636616/3647141	HAK1/MID1/CTR2/MEP1/CAALFM_C202180WA/ALR1/NHX1	7	6	3639546/3647441/3648427/3636553/3635752/3636616	1	3647141
MF	GO:0140098	catalytic activity, acting on RNA	13/324	97/2491	0.500193	0.968307	3639237/3640275/3636408/3640285/3643778/3645956/3636824/3638335/3645124/3638390/3646086/3639238/3638991	RNH1/NAM2/RNY11/ALA1/SMM1/ILS1/FRS2/CAALFM_C302880WA/CAALFM_CR03110WA/DTD2/CAALFM_C600390WA/CAALFM_C602880WA/RPO21	13	4	3636408/3643778/3636824/3638335	9	3639237/3640275/3640285/3645956/3645124/3638390/3646086/3639238/3638991
MF	GO:0140096	catalytic activity, acting on a protein	27/324	206/2491	0.51645	0.968307	3644836/3634866/3643295/3637799/3638884/3646074/3647858/3636589/3643299/3635164/3644580/3640999/3647801/3636228/3646075/3648101/3639558/3636912/3639317/3636636/3639281/3638529/3640429/3645040/3639498/3643482/3647733	CAALFM_CR06040WA/SWE1/DDI1/CAALFM_C503150WA/CAALFM_C200700WA/CAALFM_C600340CA/PTP2/AFG3/CAALFM_C114450CA/CAALFM_C304970CA/SHA3/PIM1/YAK1/KNS1/PKH3/DBF2/CAALFM_C106390WA/CAALFM_C103470CA/UBP6/CAALFM_C302260CA/CDC5/CAALFM_C307480WA/CAALFM_CR01170WA/STE24/NPR1/TPK2/MEC1	27	12	3644836/3634866/3637799/3647858/3644580/3647801/3636228/3648101/3636912/3639281/3643482/3647733	15	3643295/3638884/3646074/3636589/3643299/3635164/3640999/3646075/3639558/3639317/3636636/3638529/3640429/3645040/3639498
MF	GO:0015318	inorganic molecular entity transmembrane transporter activity	7/324	52/2491	0.523806	0.968307	3639546/3645976/3647441/3648427/3635752/3636616/3647141	HAK1/CAALFM_C604550CA/MID1/CTR2/CAALFM_C202180WA/ALR1/NHX1	7	5	3639546/3647441/3648427/3635752/3636616	2	3645976/3647141
MF	GO:0042623	ATPase activity, coupled	4/324	29/2491	0.532707	0.968307	3646284/3640999/3638014/3639256	ATM1/PIM1/RAD3/MDL2	4	0		4	3646284/3640999/3638014/3639256
MF	GO:0017111	nucleoside-triphosphatase activity	14/324	107/2491	0.535619	0.968307	3642656/3639360/3640238/3642933/3636123/3643160/3646284/3640713/3640999/3638014/3636404/3635236/3641389/3639256	VPS1/TUF1/CRL1/CAALFM_C406910WA/CAALFM_C113060CA/CAALFM_C704260WA/ATM1/FUN12/PIM1/RAD3/PRP22/DYN1/IFM1/MDL2	14	5	3642656/3640238/3642933/3636404/3635236	9	3639360/3636123/3643160/3646284/3640713/3640999/3638014/3641389/3639256
MF	GO:0016874	ligase activity	8/324	61/2491	0.548553	0.968307	3640275/3640285/3645956/3636824/3646386/3645124/3646086/3638906	NAM2/ALA1/ILS1/FRS2/GLN1/CAALFM_CR03110WA/CAALFM_C600390WA/CAALFM_C200170CA	8	2	3636824/3646386	6	3640275/3640285/3645956/3645124/3646086/3638906
MF	GO:0070011	peptidase activity, acting on L-amino acid peptides	9/324	69/2491	0.551751	0.968307	3643295/3638884/3646074/3636589/3643299/3640999/3639558/3639317/3645040	DDI1/CAALFM_C200700WA/CAALFM_C600340CA/AFG3/CAALFM_C114450CA/PIM1/CAALFM_C106390WA/UBP6/STE24	9	0		9	3643295/3638884/3646074/3636589/3643299/3640999/3639558/3639317/3645040
MF	GO:0032553	ribonucleotide binding	55/324	426/2491	0.552168	0.968307	3644836/3644060/3634866/3640275/3642097/3642656/3640285/3639360/3637323/3640238/3644581/3642933/3637799/3645982/3638884/3639324/3645956/3636123/3643160/3642794/3642919/3636589/3646284/3636874/3639192/3643877/3642502/3645033/3644580/3640713/3640999/3638014/3647801/3636824/3641618/3642989/3636228/3646075/3648101/3645865/3636404/3636912/3645124/3644440/3636636/3639281/3635236/3646086/3641389/3644077…	CAALFM_CR06040WA/EBP1/SWE1/NAM2/HSP104/VPS1/ALA1/TUF1/PYC2/CRL1/GAL1/CAALFM_C406910WA/CAALFM_C503150WA/CAALFM_C604450WA/CAALFM_C200700WA/CCT8/ILS1/CAALFM_C113060CA/CAALFM_C704260WA/CAALFM_C406430CA/OYE32/AFG3/ATM1/RAD16/CAALFM_C602980CA/RPT6/CAALFM_CR05970CA/SUB2/SHA3/FUN12/PIM1/RAD3/YAK1/FRS2/OYE23/RNR1/KNS1/PKH3/DBF2/SAR1/PRP22/CAALFM_C103470CA/CAALFM_CR03110WA/CDC48/CAALFM_C302260CA/CDC5/DYN1/…	55	22	3644836/3634866/3642097/3642656/3637323/3640238/3644581/3642933/3637799/3642794/3639192/3644580/3647801/3636824/3636228/3648101/3636404/3636912/3639281/3635236/3646667/3643482	33	3644060/3640275/3640285/3639360/3645982/3638884/3639324/3645956/3636123/3643160/3642919/3636589/3646284/3636874/3643877/3642502/3645033/3640713/3640999/3638014/3641618/3642989/3646075/3645865/3645124/3644440/3636636/3646086/3641389/3644077/3639256/3639498/3642981
MF	GO:0004540	ribonuclease activity	3/324	22/2491	0.56	0.968307	3639237/3636408/3639238	RNH1/RNY11/CAALFM_C602880WA	3	1	3636408	2	3639237/3639238
MF	GO:0015075	ion transmembrane transporter activity	8/324	62/2491	0.568086	0.968307	3639546/3645976/3647441/3648427/3636553/3635752/3636616/3647141	HAK1/CAALFM_C604550CA/MID1/CTR2/MEP1/CAALFM_C202180WA/ALR1/NHX1	8	6	3639546/3647441/3648427/3636553/3635752/3636616	2	3645976/3647141
MF	GO:0001883	purine nucleoside binding	9/324	70/2491	0.570139	0.968307	3642656/3639360/3640238/3645982/3636123/3643160/3640713/3645865/3641389	VPS1/TUF1/CRL1/CAALFM_C604450WA/CAALFM_C113060CA/CAALFM_C704260WA/FUN12/SAR1/IFM1	9	2	3642656/3640238	7	3639360/3645982/3636123/3643160/3640713/3645865/3641389
MF	GO:0005525	GTP binding	9/324	70/2491	0.570139	0.968307	3642656/3639360/3640238/3645982/3636123/3643160/3640713/3645865/3641389	VPS1/TUF1/CRL1/CAALFM_C604450WA/CAALFM_C113060CA/CAALFM_C704260WA/FUN12/SAR1/IFM1	9	2	3642656/3640238	7	3639360/3645982/3636123/3643160/3640713/3645865/3641389
MF	GO:0032549	ribonucleoside binding	9/324	70/2491	0.570139	0.968307	3642656/3639360/3640238/3645982/3636123/3643160/3640713/3645865/3641389	VPS1/TUF1/CRL1/CAALFM_C604450WA/CAALFM_C113060CA/CAALFM_C704260WA/FUN12/SAR1/IFM1	9	2	3642656/3640238	7	3639360/3645982/3636123/3643160/3640713/3645865/3641389
MF	GO:0032550	purine ribonucleoside binding	9/324	70/2491	0.570139	0.968307	3642656/3639360/3640238/3645982/3636123/3643160/3640713/3645865/3641389	VPS1/TUF1/CRL1/CAALFM_C604450WA/CAALFM_C113060CA/CAALFM_C704260WA/FUN12/SAR1/IFM1	9	2	3642656/3640238	7	3639360/3645982/3636123/3643160/3640713/3645865/3641389
MF	GO:0032561	guanyl ribonucleotide binding	9/324	70/2491	0.570139	0.968307	3642656/3639360/3640238/3645982/3636123/3643160/3640713/3645865/3641389	VPS1/TUF1/CRL1/CAALFM_C604450WA/CAALFM_C113060CA/CAALFM_C704260WA/FUN12/SAR1/IFM1	9	2	3642656/3640238	7	3639360/3645982/3636123/3643160/3640713/3645865/3641389
MF	GO:0016773	phosphotransferase activity, alcohol group as acceptor	16/324	125/2491	0.570396	0.968307	3644836/3634866/3637799/3639192/3644580/3647801/3636228/3646075/3648101/3636912/3634895/3636636/3639281/3639498/3643482/3647733	CAALFM_CR06040WA/SWE1/CAALFM_C503150WA/CAALFM_C602980CA/SHA3/YAK1/KNS1/PKH3/DBF2/CAALFM_C103470CA/DAK2/CAALFM_C302260CA/CDC5/NPR1/TPK2/MEC1	16	12	3644836/3634866/3637799/3639192/3644580/3647801/3636228/3648101/3636912/3639281/3643482/3647733	4	3646075/3634895/3636636/3639498
MF	GO:0097367	carbohydrate derivative binding	55/324	429/2491	0.576374	0.968307	3644836/3644060/3634866/3640275/3642097/3642656/3640285/3639360/3637323/3640238/3644581/3642933/3637799/3645982/3638884/3639324/3645956/3636123/3643160/3642794/3642919/3636589/3646284/3636874/3639192/3643877/3642502/3645033/3644580/3640713/3640999/3638014/3647801/3636824/3641618/3642989/3636228/3646075/3648101/3645865/3636404/3636912/3645124/3644440/3636636/3639281/3635236/3646086/3641389/3644077…	CAALFM_CR06040WA/EBP1/SWE1/NAM2/HSP104/VPS1/ALA1/TUF1/PYC2/CRL1/GAL1/CAALFM_C406910WA/CAALFM_C503150WA/CAALFM_C604450WA/CAALFM_C200700WA/CCT8/ILS1/CAALFM_C113060CA/CAALFM_C704260WA/CAALFM_C406430CA/OYE32/AFG3/ATM1/RAD16/CAALFM_C602980CA/RPT6/CAALFM_CR05970CA/SUB2/SHA3/FUN12/PIM1/RAD3/YAK1/FRS2/OYE23/RNR1/KNS1/PKH3/DBF2/SAR1/PRP22/CAALFM_C103470CA/CAALFM_CR03110WA/CDC48/CAALFM_C302260CA/CDC5/DYN1/…	55	22	3644836/3634866/3642097/3642656/3637323/3640238/3644581/3642933/3637799/3642794/3639192/3644580/3647801/3636824/3636228/3648101/3636404/3636912/3639281/3635236/3646667/3643482	33	3644060/3640275/3640285/3639360/3645982/3638884/3639324/3645956/3636123/3643160/3642919/3636589/3646284/3636874/3643877/3642502/3645033/3640713/3640999/3638014/3641618/3642989/3646075/3645865/3645124/3644440/3636636/3646086/3641389/3644077/3639256/3639498/3642981
MF	GO:0001882	nucleoside binding	9/324	71/2491	0.588198	0.968307	3642656/3639360/3640238/3645982/3636123/3643160/3640713/3645865/3641389	VPS1/TUF1/CRL1/CAALFM_C604450WA/CAALFM_C113060CA/CAALFM_C704260WA/FUN12/SAR1/IFM1	9	2	3642656/3640238	7	3639360/3645982/3636123/3643160/3640713/3645865/3641389
MF	GO:0140097	catalytic activity, acting on DNA	3/324	23/2491	0.591466	0.968307	3638014/3641632/3643106	RAD3/FPG1/OGG1	3	0		3	3638014/3641632/3643106
MF	GO:0016209	antioxidant activity	2/324	15/2491	0.599697	0.968307	3644010/3644127	CAALFM_C600850WA/CAALFM_C500810CA	2	1	3644127	1	3644010
MF	GO:0008233	peptidase activity	9/324	72/2491	0.605902	0.968307	3643295/3638884/3646074/3636589/3643299/3640999/3639558/3639317/3645040	DDI1/CAALFM_C200700WA/CAALFM_C600340CA/AFG3/CAALFM_C114450CA/PIM1/CAALFM_C106390WA/UBP6/STE24	9	0		9	3643295/3638884/3646074/3636589/3643299/3640999/3639558/3639317/3645040
MF	GO:0019001	guanyl nucleotide binding	9/324	72/2491	0.605902	0.968307	3642656/3639360/3640238/3645982/3636123/3643160/3640713/3645865/3641389	VPS1/TUF1/CRL1/CAALFM_C604450WA/CAALFM_C113060CA/CAALFM_C704260WA/FUN12/SAR1/IFM1	9	2	3642656/3640238	7	3639360/3645982/3636123/3643160/3640713/3645865/3641389
MF	GO:0016462	pyrophosphatase activity	14/324	112/2491	0.609049	0.968307	3642656/3639360/3640238/3642933/3636123/3643160/3646284/3640713/3640999/3638014/3636404/3635236/3641389/3639256	VPS1/TUF1/CRL1/CAALFM_C406910WA/CAALFM_C113060CA/CAALFM_C704260WA/ATM1/FUN12/PIM1/RAD3/PRP22/DYN1/IFM1/MDL2	14	5	3642656/3640238/3642933/3636404/3635236	9	3639360/3636123/3643160/3646284/3640713/3640999/3638014/3641389/3639256
MF	GO:0016758	transferase activity, transferring hexosyl groups	5/324	41/2491	0.632802	0.968307	3639182/3638357/3641893/3647531/3636585	BMT4/BMT7/CHS2/RHD1/MNT1	5	4	3639182/3638357/3641893/3647531	1	3636585
MF	GO:0016887	ATPase activity	5/324	41/2491	0.632802	0.968307	3642933/3646284/3640999/3638014/3639256	CAALFM_C406910WA/ATM1/PIM1/RAD3/MDL2	5	1	3642933	4	3646284/3640999/3638014/3639256
MF	GO:0004386	helicase activity	2/324	16/2491	0.635886	0.968307	3638014/3636404	RAD3/PRP22	2	1	3636404	1	3638014
MF	GO:0016627	oxidoreductase activity, acting on the CH-CH group of donors	2/324	16/2491	0.635886	0.968307	3647071/3643778	COX15/SMM1	2	1	3643778	1	3647071
MF	GO:0016791	phosphatase activity	2/324	16/2491	0.635886	0.968307	3647179/3647858	PHO8/PTP2	2	2	3647179/3647858	0
MF	GO:0019783	ubiquitin-like protein-specific protease activity	2/324	16/2491	0.635886	0.968307	3639558/3639317	CAALFM_C106390WA/UBP6	2	0		2	3639558/3639317
MF	GO:0036459	thiol-dependent ubiquitinyl hydrolase activity	2/324	16/2491	0.635886	0.968307	3639558/3639317	CAALFM_C106390WA/UBP6	2	0		2	3639558/3639317
MF	GO:0101005	ubiquitinyl hydrolase activity	2/324	16/2491	0.635886	0.968307	3639558/3639317	CAALFM_C106390WA/UBP6	2	0		2	3639558/3639317
MF	GO:0016757	transferase activity, transferring glycosyl groups	8/324	66/2491	0.642131	0.968307	3637784/3639182/3638357/3636488/3641893/3647531/3636585/3634904	MNN1/BMT4/BMT7/CAALFM_C505040WA/CHS2/RHD1/MNT1/MNN12	8	7	3637784/3639182/3638357/3636488/3641893/3647531/3634904	1	3636585
MF	GO:0050660	flavin adenine dinucleotide binding	3/324	25/2491	0.649898	0.968307	3647344/3643778/3638393	CAALFM_CR07820WA/SMM1/AIP2	3	2	3647344/3643778	1	3638393
MF	GO:0016818	hydrolase activity, acting on acid anhydrides, in phosphorus-containing anhydrides	14/324	115/2491	0.650476	0.968307	3642656/3639360/3640238/3642933/3636123/3643160/3646284/3640713/3640999/3638014/3636404/3635236/3641389/3639256	VPS1/TUF1/CRL1/CAALFM_C406910WA/CAALFM_C113060CA/CAALFM_C704260WA/ATM1/FUN12/PIM1/RAD3/PRP22/DYN1/IFM1/MDL2	14	5	3642656/3640238/3642933/3636404/3635236	9	3639360/3636123/3643160/3646284/3640713/3640999/3638014/3641389/3639256
MF	GO:0016853	isomerase activity	4/324	34/2491	0.663278	0.968307	3642618/3638966/3644583/3639321	CAALFM_C501230CA/INO1/GAL10/TRP1	4	2	3642618/3644583	2	3638966/3639321
MF	GO:0051536	iron-sulfur cluster binding	2/324	17/2491	0.669465	0.968307	3637893/3644077	LAB5/ECM17	2	1	3637893	1	3644077
MF	GO:0051540	metal cluster binding	2/324	17/2491	0.669465	0.968307	3637893/3644077	LAB5/ECM17	2	1	3637893	1	3644077
MF	GO:0060589	nucleoside-triphosphatase regulator activity	2/324	17/2491	0.669465	0.968307	3643298/3646953	GDI1/TSC2	2	1	3646953	1	3643298
MF	GO:0032555	purine ribonucleotide binding	51/324	410/2491	0.671307	0.968307	3644836/3634866/3640275/3642097/3642656/3640285/3639360/3637323/3640238/3644581/3642933/3637799/3645982/3638884/3639324/3645956/3636123/3643160/3642794/3636589/3646284/3636874/3639192/3643877/3642502/3645033/3644580/3640713/3640999/3638014/3647801/3636824/3642989/3636228/3646075/3648101/3645865/3636404/3636912/3645124/3644440/3636636/3639281/3635236/3646086/3641389/3639256/3639498/3642981/3646667…	CAALFM_CR06040WA/SWE1/NAM2/HSP104/VPS1/ALA1/TUF1/PYC2/CRL1/GAL1/CAALFM_C406910WA/CAALFM_C503150WA/CAALFM_C604450WA/CAALFM_C200700WA/CCT8/ILS1/CAALFM_C113060CA/CAALFM_C704260WA/CAALFM_C406430CA/AFG3/ATM1/RAD16/CAALFM_C602980CA/RPT6/CAALFM_CR05970CA/SUB2/SHA3/FUN12/PIM1/RAD3/YAK1/FRS2/RNR1/KNS1/PKH3/DBF2/SAR1/PRP22/CAALFM_C103470CA/CAALFM_CR03110WA/CDC48/CAALFM_C302260CA/CDC5/DYN1/CAALFM_C600390WA/…	51	22	3644836/3634866/3642097/3642656/3637323/3640238/3644581/3642933/3637799/3642794/3639192/3644580/3647801/3636824/3636228/3648101/3636404/3636912/3639281/3635236/3646667/3643482	29	3640275/3640285/3639360/3645982/3638884/3639324/3645956/3636123/3643160/3636589/3646284/3636874/3643877/3642502/3645033/3640713/3640999/3638014/3642989/3646075/3645865/3645124/3644440/3636636/3646086/3641389/3639256/3639498/3642981
MF	GO:0035639	purine ribonucleoside triphosphate binding	51/324	410/2491	0.671307	0.968307	3644836/3634866/3640275/3642097/3642656/3640285/3639360/3637323/3640238/3644581/3642933/3637799/3645982/3638884/3639324/3645956/3636123/3643160/3642794/3636589/3646284/3636874/3639192/3643877/3642502/3645033/3644580/3640713/3640999/3638014/3647801/3636824/3642989/3636228/3646075/3648101/3645865/3636404/3636912/3645124/3644440/3636636/3639281/3635236/3646086/3641389/3639256/3639498/3642981/3646667…	CAALFM_CR06040WA/SWE1/NAM2/HSP104/VPS1/ALA1/TUF1/PYC2/CRL1/GAL1/CAALFM_C406910WA/CAALFM_C503150WA/CAALFM_C604450WA/CAALFM_C200700WA/CCT8/ILS1/CAALFM_C113060CA/CAALFM_C704260WA/CAALFM_C406430CA/AFG3/ATM1/RAD16/CAALFM_C602980CA/RPT6/CAALFM_CR05970CA/SUB2/SHA3/FUN12/PIM1/RAD3/YAK1/FRS2/RNR1/KNS1/PKH3/DBF2/SAR1/PRP22/CAALFM_C103470CA/CAALFM_CR03110WA/CDC48/CAALFM_C302260CA/CDC5/DYN1/CAALFM_C600390WA/…	51	22	3644836/3634866/3642097/3642656/3637323/3640238/3644581/3642933/3637799/3642794/3639192/3644580/3647801/3636824/3636228/3648101/3636404/3636912/3639281/3635236/3646667/3643482	29	3640275/3640285/3639360/3645982/3638884/3639324/3645956/3636123/3643160/3636589/3646284/3636874/3643877/3642502/3645033/3640713/3640999/3638014/3642989/3646075/3645865/3645124/3644440/3636636/3646086/3641389/3639256/3639498/3642981
MF	GO:0016817	hydrolase activity, acting on acid anhydrides	14/324	117/2491	0.676782	0.968307	3642656/3639360/3640238/3642933/3636123/3643160/3646284/3640713/3640999/3638014/3636404/3635236/3641389/3639256	VPS1/TUF1/CRL1/CAALFM_C406910WA/CAALFM_C113060CA/CAALFM_C704260WA/ATM1/FUN12/PIM1/RAD3/PRP22/DYN1/IFM1/MDL2	14	5	3642656/3640238/3642933/3636404/3635236	9	3639360/3636123/3643160/3646284/3640713/3640999/3638014/3641389/3639256
MF	GO:0005524	ATP binding	42/324	340/2491	0.677298	0.968307	3644836/3634866/3640275/3642097/3640285/3637323/3644581/3642933/3637799/3638884/3639324/3645956/3642794/3636589/3646284/3636874/3639192/3643877/3642502/3645033/3644580/3640999/3638014/3647801/3636824/3642989/3636228/3646075/3648101/3636404/3636912/3645124/3644440/3636636/3639281/3635236/3646086/3639256/3639498/3642981/3646667/3643482	CAALFM_CR06040WA/SWE1/NAM2/HSP104/ALA1/PYC2/GAL1/CAALFM_C406910WA/CAALFM_C503150WA/CAALFM_C200700WA/CCT8/ILS1/CAALFM_C406430CA/AFG3/ATM1/RAD16/CAALFM_C602980CA/RPT6/CAALFM_CR05970CA/SUB2/SHA3/PIM1/RAD3/YAK1/FRS2/RNR1/KNS1/PKH3/DBF2/PRP22/CAALFM_C103470CA/CAALFM_CR03110WA/CDC48/CAALFM_C302260CA/CDC5/DYN1/CAALFM_C600390WA/MDL2/NPR1/PR26/CAALFM_C107480CA/TPK2	42	20	3644836/3634866/3642097/3637323/3644581/3642933/3637799/3642794/3639192/3644580/3647801/3636824/3636228/3648101/3636404/3636912/3639281/3635236/3646667/3643482	22	3640275/3640285/3638884/3639324/3645956/3636589/3646284/3636874/3643877/3642502/3645033/3640999/3638014/3642989/3646075/3645124/3644440/3636636/3646086/3639256/3639498/3642981
MF	GO:0032559	adenyl ribonucleotide binding	42/324	340/2491	0.677298	0.968307	3644836/3634866/3640275/3642097/3640285/3637323/3644581/3642933/3637799/3638884/3639324/3645956/3642794/3636589/3646284/3636874/3639192/3643877/3642502/3645033/3644580/3640999/3638014/3647801/3636824/3642989/3636228/3646075/3648101/3636404/3636912/3645124/3644440/3636636/3639281/3635236/3646086/3639256/3639498/3642981/3646667/3643482	CAALFM_CR06040WA/SWE1/NAM2/HSP104/ALA1/PYC2/GAL1/CAALFM_C406910WA/CAALFM_C503150WA/CAALFM_C200700WA/CCT8/ILS1/CAALFM_C406430CA/AFG3/ATM1/RAD16/CAALFM_C602980CA/RPT6/CAALFM_CR05970CA/SUB2/SHA3/PIM1/RAD3/YAK1/FRS2/RNR1/KNS1/PKH3/DBF2/PRP22/CAALFM_C103470CA/CAALFM_CR03110WA/CDC48/CAALFM_C302260CA/CDC5/DYN1/CAALFM_C600390WA/MDL2/NPR1/PR26/CAALFM_C107480CA/TPK2	42	20	3644836/3634866/3642097/3637323/3644581/3642933/3637799/3642794/3639192/3644580/3647801/3636824/3636228/3648101/3636404/3636912/3639281/3635236/3646667/3643482	22	3640275/3640285/3638884/3639324/3645956/3636589/3646284/3636874/3643877/3642502/3645033/3640999/3638014/3642989/3646075/3645124/3644440/3636636/3646086/3639256/3639498/3642981
MF	GO:0030554	adenyl nucleotide binding	42/324	342/2491	0.693132	0.968307	3644836/3634866/3640275/3642097/3640285/3637323/3644581/3642933/3637799/3638884/3639324/3645956/3642794/3636589/3646284/3636874/3639192/3643877/3642502/3645033/3644580/3640999/3638014/3647801/3636824/3642989/3636228/3646075/3648101/3636404/3636912/3645124/3644440/3636636/3639281/3635236/3646086/3639256/3639498/3642981/3646667/3643482	CAALFM_CR06040WA/SWE1/NAM2/HSP104/ALA1/PYC2/GAL1/CAALFM_C406910WA/CAALFM_C503150WA/CAALFM_C200700WA/CCT8/ILS1/CAALFM_C406430CA/AFG3/ATM1/RAD16/CAALFM_C602980CA/RPT6/CAALFM_CR05970CA/SUB2/SHA3/PIM1/RAD3/YAK1/FRS2/RNR1/KNS1/PKH3/DBF2/PRP22/CAALFM_C103470CA/CAALFM_CR03110WA/CDC48/CAALFM_C302260CA/CDC5/DYN1/CAALFM_C600390WA/MDL2/NPR1/PR26/CAALFM_C107480CA/TPK2	42	20	3644836/3634866/3642097/3637323/3644581/3642933/3637799/3642794/3639192/3644580/3647801/3636824/3636228/3648101/3636404/3636912/3639281/3635236/3646667/3643482	22	3640275/3640285/3638884/3639324/3645956/3636589/3646284/3636874/3643877/3642502/3645033/3640999/3638014/3642989/3646075/3645124/3644440/3636636/3646086/3639256/3639498/3642981
MF	GO:0017076	purine nucleotide binding	51/324	414/2491	0.700614	0.968307	3644836/3634866/3640275/3642097/3642656/3640285/3639360/3637323/3640238/3644581/3642933/3637799/3645982/3638884/3639324/3645956/3636123/3643160/3642794/3636589/3646284/3636874/3639192/3643877/3642502/3645033/3644580/3640713/3640999/3638014/3647801/3636824/3642989/3636228/3646075/3648101/3645865/3636404/3636912/3645124/3644440/3636636/3639281/3635236/3646086/3641389/3639256/3639498/3642981/3646667…	CAALFM_CR06040WA/SWE1/NAM2/HSP104/VPS1/ALA1/TUF1/PYC2/CRL1/GAL1/CAALFM_C406910WA/CAALFM_C503150WA/CAALFM_C604450WA/CAALFM_C200700WA/CCT8/ILS1/CAALFM_C113060CA/CAALFM_C704260WA/CAALFM_C406430CA/AFG3/ATM1/RAD16/CAALFM_C602980CA/RPT6/CAALFM_CR05970CA/SUB2/SHA3/FUN12/PIM1/RAD3/YAK1/FRS2/RNR1/KNS1/PKH3/DBF2/SAR1/PRP22/CAALFM_C103470CA/CAALFM_CR03110WA/CDC48/CAALFM_C302260CA/CDC5/DYN1/CAALFM_C600390WA/…	51	22	3644836/3634866/3642097/3642656/3637323/3640238/3644581/3642933/3637799/3642794/3639192/3644580/3647801/3636824/3636228/3648101/3636404/3636912/3639281/3635236/3646667/3643482	29	3640275/3640285/3639360/3645982/3638884/3639324/3645956/3636123/3643160/3636589/3646284/3636874/3643877/3642502/3645033/3640713/3640999/3638014/3642989/3646075/3645865/3645124/3644440/3636636/3646086/3641389/3639256/3639498/3642981
MF	GO:0022804	active transmembrane transporter activity	3/324	28/2491	0.72595	0.968307	3646284/3647141/3639256	ATM1/NHX1/MDL2	3	0		3	3646284/3647141/3639256
MF	GO:0004518	nuclease activity	4/324	37/2491	0.728687	0.968307	3639237/3636408/3647079/3639238	RNH1/RNY11/CAALFM_C600770CA/CAALFM_C602880WA	4	1	3636408	3	3639237/3647079/3639238
MF	GO:0003774	motor activity	1/324	2491-10-01	0.752443	0.968307	3635236	DYN1	1	1	3635236	0
MF	GO:0004252	serine-type endopeptidase activity	1/324	2491-10-01	0.752443	0.968307	3640999	PIM1	1	0		1	3640999
MF	GO:0008194	UDP-glycosyltransferase activity	1/324	2491-10-01	0.752443	0.968307	3641893	CHS2	1	1	3641893	0
MF	GO:0008238	exopeptidase activity	1/324	2491-10-01	0.752443	0.968307	3643299	CAALFM_C114450CA	1	0		1	3643299
MF	GO:0016765	transferase activity, transferring alkyl or aryl (other than methyl) groups	1/324	2491-10-01	0.752443	0.968307	3643940	HEM3	1	1	3643940	0
MF	GO:0008234	cysteine-type peptidase activity	2/324	21/2491	0.779341	0.968307	3639558/3639317	CAALFM_C106390WA/UBP6	2	0		2	3639558/3639317
MF	GO:0015399	primary active transmembrane transporter activity	2/324	21/2491	0.779341	0.968307	3646284/3639256	ATM1/MDL2	2	0		2	3646284/3639256
MF	GO:0015405	P-P-bond-hydrolysis-driven transmembrane transporter activity	2/324	21/2491	0.779341	0.968307	3646284/3639256	ATM1/MDL2	2	0		2	3646284/3639256
MF	GO:0042626	ATPase activity, coupled to transmembrane movement of substances	2/324	21/2491	0.779341	0.968307	3646284/3639256	ATM1/MDL2	2	0		2	3646284/3639256
MF	GO:0043492	ATPase activity, coupled to movement of substances	2/324	21/2491	0.779341	0.968307	3646284/3639256	ATM1/MDL2	2	0		2	3646284/3639256
MF	GO:0004721	phosphoprotein phosphatase activity	1/324	2491-11-01	0.784772	0.968307	3647858	PTP2	1	1	3647858	0
MF	GO:0005085	guanyl-nucleotide exchange factor activity	1/324	2491-11-01	0.784772	0.968307	3647315	BUD5	1	1	3647315	0
MF	GO:0016667	oxidoreductase activity, acting on a sulfur group of donors	1/324	2491-11-01	0.784772	0.968307	3646660	CAALFM_C107630WA	1	0		1	3646660
MF	GO:0050661	NADP binding	1/324	2491-11-01	0.784772	0.968307	3639239	HPD1	1	1	3639239	0
MF	GO:0015077	monovalent inorganic cation transmembrane transporter activity	2/324	22/2491	0.801275	0.971658	3639546/3647141	HAK1/NHX1	2	1	3639546	1	3647141
MF	GO:0016772	transferase activity, transferring phosphorus-containing groups	22/324	195/2491	0.802527	0.971658	3644836/3634866/3643784/3644557/3637799/3644591/3639192/3644580/3637769/3647801/3636228/3646075/3648101/3636912/3634895/3636636/3639281/3636132/3638991/3639498/3643482/3647733	CAALFM_CR06040WA/SWE1/IPK2/CHO1/CAALFM_C503150WA/GAL7/CAALFM_C602980CA/SHA3/UAP1/YAK1/KNS1/PKH3/DBF2/CAALFM_C103470CA/DAK2/CAALFM_C302260CA/CDC5/MET3/RPO21/NPR1/TPK2/MEC1	22	16	3644836/3634866/3643784/3644557/3637799/3644591/3639192/3644580/3637769/3647801/3636228/3648101/3636912/3639281/3643482/3647733	6	3646075/3634895/3636636/3636132/3638991/3639498
MF	GO:0005509	calcium ion binding	1/324	2491-12-01	0.81289	0.971658	3637426	CAALFM_C203910CA	1	0		1	3637426
MF	GO:0008047	enzyme activator activity	1/324	2491-12-01	0.81289	0.971658	3646953	TSC2	1	1	3646953	0
MF	GO:0016705	oxidoreductase activity, acting on paired donors, with incorporation or reduction of molecular oxygen	2/324	23/2491	0.821257	0.974049	3640295/3639700	CAALFM_C603600CA/ALK2	2	2	3640295/3639700	0
MF	GO:0016879	ligase activity, forming carbon-nitrogen bonds	1/324	13/2491	0.837345	0.977874	3646386	GLN1	1	1	3646386	0
MF	GO:0003723	RNA binding	10/324	98/2491	0.840376	0.977874	3636408/3635700/3647730/3636824/3635203/3636455/3645124/3637704/3642478/3645426	RNY11/CAALFM_C401280CA/SUI1/FRS2/CAALFM_C305290CA/CAALFM_C504290CA/CAALFM_CR03110WA/CAALFM_C503100CA/CAALFM_C105400CA/CAALFM_C101900CA	10	7	3636408/3635700/3647730/3636824/3635203/3636455/3637704	3	3645124/3642478/3645426
MF	GO:0016779	nucleotidyltransferase activity	4/324	44/2491	0.843656	0.977874	3644591/3637769/3636132/3638991	GAL7/UAP1/MET3/RPO21	4	2	3644591/3637769	2	3636132/3638991
MF	GO:0008144	drug binding	42/324	369/2491	0.862653	0.992375	3644836/3634866/3640275/3642097/3640285/3637323/3644581/3642933/3637799/3638884/3639324/3645956/3642794/3636589/3646284/3636874/3639192/3643877/3642502/3645033/3644580/3640999/3638014/3647801/3636824/3642989/3636228/3646075/3648101/3636404/3636912/3645124/3644440/3636636/3639281/3635236/3646086/3639256/3639498/3642981/3646667/3643482	CAALFM_CR06040WA/SWE1/NAM2/HSP104/ALA1/PYC2/GAL1/CAALFM_C406910WA/CAALFM_C503150WA/CAALFM_C200700WA/CCT8/ILS1/CAALFM_C406430CA/AFG3/ATM1/RAD16/CAALFM_C602980CA/RPT6/CAALFM_CR05970CA/SUB2/SHA3/PIM1/RAD3/YAK1/FRS2/RNR1/KNS1/PKH3/DBF2/PRP22/CAALFM_C103470CA/CAALFM_CR03110WA/CDC48/CAALFM_C302260CA/CDC5/DYN1/CAALFM_C600390WA/MDL2/NPR1/PR26/CAALFM_C107480CA/TPK2	42	20	3644836/3634866/3642097/3637323/3644581/3642933/3637799/3642794/3639192/3644580/3647801/3636824/3636228/3648101/3636404/3636912/3639281/3635236/3646667/3643482	22	3640275/3640285/3638884/3639324/3645956/3636589/3646284/3636874/3643877/3642502/3645033/3640999/3638014/3642989/3646075/3645124/3644440/3636636/3646086/3639256/3639498/3642981
MF	GO:0008236	serine-type peptidase activity	1/324	16/2491	0.893188	0.999756	3640999	PIM1	1	0		1	3640999
MF	GO:0017171	serine hydrolase activity	1/324	16/2491	0.893188	0.999756	3640999	PIM1	1	0		1	3640999
MF	GO:0000287	magnesium ion binding	1/324	17/2491	0.90717	0.999756	3636552	ILV2	1	0		1	3636552
MF	GO:0030234	enzyme regulator activity	2/324	29/2491	0.907486	0.999756	3643298/3646953	GDI1/TSC2	2	1	3646953	1	3643298
MF	GO:0098772	molecular function regulator	3/324	40/2491	0.909082	0.999756	3643298/3647315/3646953	GDI1/BUD5/TSC2	3	2	3647315/3646953	1	3643298
MF	GO:0009055	electron transfer activity	1/324	18/2491	0.919328	0.999756	3646660	CAALFM_C107630WA	1	0		1	3646660
MF	GO:0015078	proton transmembrane transporter activity	1/324	20/2491	0.939085	0.999756	3647141	NHX1	1	0		1	3647141
MF	GO:0051020	GTPase binding	1/324	20/2491	0.939085	0.999756	3647315	BUD5	1	1	3647315	0
MF	GO:0019842	vitamin binding	2/324	35/2491	0.953571	0.999756	3647320/3636552	ARO10/ILV2	2	1	3647320	1	3636552
MF	GO:0003899	DNA-directed 5'-3' RNA polymerase activity	1/324	22/2491	0.954015	0.999756	3638991	RPO21	1	0		1	3638991
MF	GO:0008092	cytoskeletal protein binding	1/324	22/2491	0.954015	0.999756	3646616	CAALFM_CR06740WA	1	1	3646616	0
MF	GO:0034062	5'-3' RNA polymerase activity	1/324	22/2491	0.954015	0.999756	3638991	RPO21	1	0		1	3638991
MF	GO:0097747	RNA polymerase activity	1/324	22/2491	0.954015	0.999756	3638991	RPO21	1	0		1	3638991
MF	GO:0016740	transferase activity	38/324	370/2491	0.965273	0.999991	3637784/3644836/3634866/3643784/3639182/3644557/3638357/3636488/3637342/3641893/3637799/3644591/3647531/3639192/3635164/3644580/3637769/3647801/3639339/3636228/3646075/3648101/3636912/3643940/3634895/3636585/3636636/3639281/3636132/3638991/3643416/3638529/3634904/3643486/3640429/3639498/3643482/3647733	MNN1/CAALFM_CR06040WA/SWE1/IPK2/BMT4/CHO1/BMT7/CAALFM_C505040WA/ADAEC/CHS2/CAALFM_C503150WA/GAL7/RHD1/CAALFM_C602980CA/CAALFM_C304970CA/SHA3/UAP1/YAK1/LEU4/KNS1/PKH3/DBF2/CAALFM_C103470CA/HEM3/DAK2/MNT1/CAALFM_C302260CA/CDC5/MET3/RPO21/COQ5/CAALFM_C307480WA/MNN12/CAALFM_C207240CA/CAALFM_CR01170WA/NPR1/TPK2/MEC1	38	26	3637784/3644836/3634866/3643784/3639182/3644557/3638357/3636488/3637342/3641893/3637799/3644591/3647531/3639192/3644580/3637769/3647801/3636228/3648101/3636912/3643940/3639281/3634904/3643486/3643482/3647733	12	3635164/3639339/3646075/3634895/3636585/3636636/3636132/3638991/3643416/3638529/3640429/3639498
MF	GO:0019899	enzyme binding	1/324	28/2491	0.980246	0.999991	3647315	BUD5	1	1	3647315	0
MF	GO:0008168	methyltransferase activity	2/324	44/2491	0.984168	0.999991	3637342/3643416	ADAEC/COQ5	2	1	3637342	1	3643416
MF	GO:0016746	transferase activity, transferring acyl groups	1/324	32/2491	0.988767	0.999991	3639339	LEU4	1	0		1	3639339
MF	GO:0016741	transferase activity, transferring one-carbon groups	2/324	50/2491	0.992435	0.999991	3637342/3643416	ADAEC/COQ5	2	1	3637342	1	3643416
MF	GO:0005198	structural molecule activity	3/324	94/2491	0.999809	0.999991	3645870/3645351/3639723	SEC27/NUP84/CAALFM_CR00490WA	3	1	3645351	2	3645870/3639723
MF	GO:0003735	structural constituent of ribosome	1/324	82/2491	0.999991	0.999991	3639723	CAALFM_CR00490WA	1	0		1	3639723
