# Supplementary material for: Genetic Insights into the Rheological Phenotype of Candida albicans Biofilms
Source: Research Square preprint supplement (doi:10.21203/rs.3.rs-8555167/v1), 2026-01-20
Supplement: Supplementary file 11 [file cb0383ce2c2a50e1d7f10db9.xlsx]

## Sheet: Sheet1
Fluconazole resistance -- reported as CFU/ml
BWP17 +	pmr1∆/∆ +	kre5∆/∆ +	alg11∆/∆ +	BWP17 2mg/ml	pmr1∆/∆ 2mg/ml	kre5∆/∆ 2mg/ml	alg11∆/∆ 2mg/ml	BWP17 1mg/ml	pmr1∆/∆ 1mg/ml	kre5∆/∆ 1mg/ml	alg11∆/∆ 1mg/ml
2000000	12000000	18000000	3400000	1400000	260000	18000	14000	8000000	1200000	24000	1200000
4000000	2000000	18000000	5000000	2200000	60000	18000	14000	26000000	2400000	28000	1800000
6000000	4000000	20000000	10000000	500000	120000	20000	14000	14000000	2000000	8000	0
6000000	2000000	12000000	12000000	2400000	340000	12000	12000	14000000	2200000	40000	0
4000000	4000000	6000000	12000000	600000	40000	6000	18000	22000000	1600000	40000	400000
4000000	2000000	14000000	5000000	1000000	140000	14000	20000	12000000	2600000	8000	2600000
4000000	2000000	10000000		1800000	320000	10000	12000			44000	800000
12000000	6000000	2000000		1800000	80000	2000	18000			32000	0
16000000	4000000			240000	80000	0	20000			8000	2400000
Change in CFU/ml from control to 2 mg/ml fluconazole
	BWP17	pmr1 ∆/∆	kre5 ∆/∆	alg11 ∆/∆
Mean	-0.7014	-1.445	-3	-2.669
SEM	0.173	0.1481	0	0.1057
