# Supplementary material for: Genetic Insights into the Rheological Phenotype of Candida albicans Biofilms
Source: Research Square preprint supplement (doi:10.21203/rs.3.rs-8555167/v1), 2026-01-20
Supplement: Supplementary file 12 [file cf9308fb40f9df1f746d0f9c.xlsx]

## Sheet: goFinderResult.14737
Enriched GO Biological Process terms in the set of genes differentially expressed in alg11∆/∆, kre5∆/∆, and/or pmr1∆/∆
GOID	GO_term	Corrected P-value	False discovery rate	Gene(s) annotated to the term	Directly Annotated GOID List
8643	carbohydrate transport	1e-10	0	C1_00410C_A:C1_01620C_A:SCW4:C1_04460C_A:C1_05120W_A:C1_05160C_A:PRC3:C1_06000W_A:PBR1:ANT1:C1_06860W_A:RTT102:GPI8:LYS143:C1_09220W_A:LIP2:LIP1:C1_09980C_A:C1_10140C_A:CHO1:C1_12930C_A:OP4:HYR1:HSP70:CYB2:DAL7:FTR1:HGT7:C2_01450C_A:FMO1:C2_02230C_A:FGR22:HGT20:PLC2:PGA17:SAP99:MNN41:HSP21:DCK2:UGA1:C2_04480W_A:C2_05130W_A:FAA2-1:GIT1:LSP1:PST1:C2_07410W_A:RHO2:C2_08170W_A:PST2:C2_08920W_A:MIT1:D…	1902660:1410:6006:51792:15727:15749:6890:44237:15794:45944:6043:33215:46580:30447:6281:6849:55085:42710:6882:6458:44399:71483:46942:16255:30950:71277:742:15867:6807:97080:51666:6046:7121:6673:45732:6038:70588:7188:1900239:1990539:44182:6312:7155:31929:6511:6906:6351:2001040:30466:30643:90481:34599:8643:30163:46938:1558:60257:1902114:6616:70610:747:1901684:6865:45332:1678:6508:16559:15807:46416:15…
15893	drug transport	0.01323	0	EHT1:PDR16:PBR1:HAK1:LIP2:C1_12930C_A:HYR1:C2_00640W_A:COX17:C2_02580W_A:HGT20:FRE9:GWT1:EFH1:C2_06440C_A:C2_07240C_A:OPT5:KGD1:NDE1:C3_03470W_A:C3_04120C_A:ALS6:HST6:C3_07670W_A:C4_01840C_A:C4_02720C_A:PYC2:FGR10:C4_06150C_A:PGA15:GUT2:OYE32:ARR3:YDC1:GIT4:TRX2:SGE1:C5_03770C_A:FET3:C6_01870C_A:SAP6:MDR1:YMX6:SAP4:C6_03540W_A:C6_03620C_A:ALS9:OPT8:C6_04510C_A:C7_00270W_A:TLO16:CR_01810C_A:PGA22:…	9410:51792:45944:33215:30447:463:55085:16126:6116:15914:71805:43942:6090:46952:6071:7155:34599:8643:30163:15848:747:6508:6879:15700:44010:35672:6672:15699:15903:43710:480:30682:6540:44255:15718:30150:7033:770:90539:6817:19655:42783:1407:6506:122:6810:44419:33494:472:6357:296:33617:46513:140116:19538:30036:43709:51701:52553:45454:52391:30476:8152:71631:42981:36166:43161:44406:1903424:1516:1904659:…
6810	transport	0.04545	0.0067	C1_00410C_A:UGA32:RIC1:CCH1:C1_01620C_A:C1_02410C_A:SCW4:C1_02850W_A:MIA40:PDR16:KTR4:C1_04460C_A:C1_05120W_A:C1_05160C_A:MTM1:C1_05630C_A:UGA4:PRC3:C1_06000W_A:PBR1:C1_06480C_A:ANT1:HAK1:VPS34:C1_06860W_A:RTT102:GPI8:C1_07630W_A:APS3:LYS143:C1_09220W_A:LIP2:LIP1:C1_09980C_A:C1_10140C_A:C1_10350C_A:MNN2:TIM50:CHO1:C1_11250W_A:C1_11600W_A:C1_11920W_A:C1_12830C_A:C1_12930C_A:OP4:AKR1:COX19:HYR1:HSP…	7010:2000601:16237:32:15727:15749:45324:44650:15794:1900443:6043:33215:30447:463:6849:55085:6429:1408:6882:6458:9097:48015:722:6325:46519:16255:45899:742:7114:34497:51666:350:10520:226:6673:6814:10994:45732:9082:43942:1990571:7019:1900239:1990539:6312:7155:31929:71470:1904380:6351:2001040:42026:31509:30466:6812:71168:90481:46938:6267:6302:110009:30001:15848:30100:31571:1902114:6616:70610:9651:190…
51234	establishment of localization	0.05846	0.015	C1_00410C_A:UGA32:RIC1:CCH1:C1_01620C_A:C1_02410C_A:SCW4:C1_02850W_A:MIA40:PDR16:KTR4:C1_04460C_A:C1_05120W_A:C1_05160C_A:MTM1:C1_05630C_A:UGA4:PRC3:C1_06000W_A:PBR1:C1_06480C_A:ANT1:HAK1:VPS34:C1_06860W_A:RTT102:GPI8:C1_07630W_A:APS3:LYS143:C1_09220W_A:LIP2:LIP1:C1_09980C_A:C1_10140C_A:C1_10350C_A:MNN2:TIM50:CHO1:C1_11250W_A:C1_11600W_A:CAS1:C1_11920W_A:C1_12830C_A:C1_12930C_A:OP4:AKR1:COX19:HYR…	7010:2000601:16237:32:15727:15749:45324:44650:15794:1900443:6043:33215:30447:463:6849:55085:6429:1408:6882:6458:9097:48015:722:6325:46519:8608:16255:45899:742:7114:45048:34497:51666:350:10520:226:6673:6814:10994:45732:9082:43942:1990571:7019:1900239:1990539:6312:7155:31929:71470:1904380:6351:2001040:34551:42026:31509:30466:6812:71168:90481:46938:6267:6302:110009:30001:15848:30100:31571:1902114:66…
6626	protein targeting to mitochondrion	0.07408	0.02	MIA40:MTM1:C1_07630W_A:TIM50:COX19:C2_00700W_A:COX17:TIM23:TIM44:AFG3:TOM6:ILV2:C3_03470W_A:SAM50:PRO2:MMM1:TIM10:C4_06290W_A:SDH4:OCT1:C6_00920W_A:MDL2:NAM2:C6_04510C_A:C7_00760C_A:C7_01600W_A:TOM7:TOM40:C7_03380W_A:TIM9:RAD6:MAM33:MGE1:CR_01810C_A:ERV1	30447:463:55085:6429:9097:722:6325:9082:42026:31509:30001:31571:9060:44010:44180:70987:6540:71596:30150:6970:6457:40029:46685:6810:45454:106035:724:43161:32543:32979:33108:372:6465:97428:2000639:462:50821:15893:15680:34727:90089:46902:120174:6974:45944:70525:15914:6627:6511:6561:42276:6366:34599:31921:6508:6879:45041:6353:30433:6915:71629:7005:45039:15917:61668:45040:33617:42775:1990456:2:9450:64…
70585	protein localization to mitochondrion	0.09287	0.02	MIA40:MTM1:C1_07630W_A:TIM50:COX19:C2_00700W_A:COX17:TIM23:TIM44:AFG3:TOM6:ILV2:C3_03470W_A:SAM50:PRO2:MMM1:TIM10:C4_06290W_A:SDH4:OCT1:C6_00920W_A:MDL2:NAM2:C6_04510C_A:C7_00760C_A:C7_01600W_A:TOM7:TOM40:C7_03380W_A:TIM9:RAD6:MAM33:MGE1:CR_01810C_A:ERV1:CR_05970C_A	30447:463:55085:6429:9097:722:6325:9082:34551:42026:31509:30001:31571:9060:44010:44180:70987:6540:71596:30150:6970:6457:40029:46685:6810:45454:106035:724:43161:32543:32979:33108:372:6465:97428:2000639:462:50821:15893:15680:34727:90089:46902:120174:6974:45944:70525:15914:6627:6511:6561:42276:6366:34599:31921:6508:6879:45041:6353:30433:6915:71629:7005:45039:15917:61668:45040:33617:42775:1990456:2:9…
72655	establishment of protein localization to mitochondrion	0.09287	0.0171	MIA40:MTM1:C1_07630W_A:TIM50:COX19:C2_00700W_A:COX17:TIM23:TIM44:AFG3:TOM6:ILV2:C3_03470W_A:SAM50:PRO2:MMM1:TIM10:C4_06290W_A:SDH4:OCT1:C6_00920W_A:MDL2:NAM2:C6_04510C_A:C7_00760C_A:C7_01600W_A:TOM7:TOM40:C7_03380W_A:TIM9:RAD6:MAM33:MGE1:CR_01810C_A:ERV1:CR_05970C_A	30447:463:55085:6429:9097:722:6325:9082:34551:42026:31509:30001:31571:9060:44010:44180:70987:6540:71596:30150:6970:6457:40029:46685:6810:45454:106035:724:43161:32543:32979:33108:372:6465:97428:2000639:462:50821:15893:15680:34727:90089:46902:120174:6974:45944:70525:15914:6627:6511:6561:42276:6366:34599:31921:6508:6879:45041:6353:30433:6915:71629:7005:45039:15917:61668:45040:33617:42775:1990456:2:9…
