# Supplementary material for: Genetic Insights into the Rheological Phenotype of Candida albicans Biofilms
Source: Research Square preprint supplement (doi:10.21203/rs.3.rs-8555167/v1), 2026-01-20
Supplement: Supplementary file 13 [file f9379d51afec23855b2b0ec1.xlsx]

## Sheet: goTermMapperResult.17548
GO Biological Process terms mapped to the intersection set of genes differentially expressed in alg11∆/∆, kre5∆/∆, and pmr1∆/∆
GOID	GO term	Gene(s)	Organism
6810	transport	HAK1 ATX1 PST1 PHO87 ALK2 C5_04940W_A C6_02180W_A C1_06860W_A SNF4 PEX7 PST2 C1_03990W_A MNN41 MDR1 TIM50 POL93 C1_10140C_A TIM44 C2_07240C_A C4_03050C_A SEC27 UBP6 NHX1 OPT5 C1_09220W_A GIT4 TIM9 C6_04510C_A AFG3 AKR1 RPT6 MIA40 C6_03290W_A PBR1 C6_01370W_A RNY11 C1_05980W_A PGA44 FET3 TOM40 C1_06000W_A PGA23 PGA41 SEC9 HGT9 C6_00310W_A C4_03810W_A C1_10350C_A C4_02150C_A NAG3 FET34 C7_01600W_A …	Candida albicans
8150	biological_process	C6_00120W_A C1_14530W_A C4_03300C_A C6_03990C_A C2_03570C_A C4_05730W_A IFF8 C3_04450C_A C5_03650C_A C3_03370C_A C2_02910W_A C5_01260W_A C4_06470W_A C1_14450C_A C4_03960W_A C5_03030W_A CR_08270W_A C2_04960C_A PGA30 C6_00800C_A C4_00850C_A C3_06660C_A CR_07820W_A CR_04850C_A C1_06500W_A C5_04390C_A C4_02200C_A C1_06160W_A C7_04340C_A C1_04590W_A C1_11680C_A C7_02920W_A C4_04190C_A C5_00510W_A CR_0…	Candida albicans
30163	protein catabolic process	VID27 RPN7 OYE23 CDC39 C4_06430C_A RAD18 ATX1 HSP104 SNF4 PEX7 C1_03990W_A C4_03050C_A UBP6 C1_02390W_A RPT6 CR_03120W_A C6_03290W_A C6_01370W_A C6_00850W_A CYM1 C6_04050W_A SEC9 C6_00310W_A C2_00750W_A C6_02300C_A C4_02150C_A PDI1 RPN11 INO1 CTA1 C6_01870C_A C2_06890C_A C1_06390W_A C6_03780C_A SOD1 C2_03910C_A C6_04470C_A C2_00700W_A PIM1 PR26 RPN2 GRE2	Candida albicans
50789	regulation of biological process	CDC39 PCL1 RAD18 C6_02090C_A PHO87 AEP1 SNF4 EDC3 YOX1 RTG3 C1_10140C_A UBP6 AKR1 RPT6 C6_03290W_A C1_05980W_A AGO1 C6_00310W_A SEC12 C1_10350C_A C4_02150C_A C4_01300W_A C6_04290W_A CTA1 C1_02760W_A HHO1 HHT21 RGS2 SOD1 ARC15 GDI1 UGA33 C6_04470C_A C6_02310W_A ORM1 TSC2 PIM1 PR26 YKE2 PKH3 C6_00090W_A RPN2	Candida albicans
6996	organelle organization	C6_01210W_A PCL1 C3_02270W_A CDC13 CR_05970C_A C4_06150C_A HSP104 SNF4 PEX7 EDC3 TIM50 CR_01100C_A RTG3 NHX1 TIM9 ASK1 C1_06000W_A SEC9 C4_03810W_A SEC12 C4_01300W_A RPN11 C7_01600W_A C1_02760W_A C4_06440C_A HHO1 HHT21 RGS2 ARC15 COX17 MAM33 C1_12830C_A CCE1 YKE2 C6_00090W_A	Candida albicans
6950	response to stress	VID27 FGR29 CDC39 PCL1 C4_06430C_A RAD18 ATX1 PST1 HSP104 SNF4 PST2 MDR1 EDC3 RTG3 RNR1 C1_02390W_A RPT6 C6_00850W_A CCT8 C6_00310W_A CIP1 PDI1 FET34 C1_02760W_A HHT21 SOD1 C2_03910C_A C6_04470C_A C6_01460C_A HPA2 ORM1 TSC2 C1_07630W_A PKH3 GRE2	Candida albicans
6412	translation	C6_04560W_A PHO87 CR_05970C_A C1_05220C_A DAG7 ALA1 CR_01100C_A YOX1 HHF22 RNR1 TIM9 ILS1 MIA40 CCT8 C1_13060C_A PRO3 TOM40 CR_03110W_A NAG3 C7_01600W_A HHO1 EMP70 HHF1 HHT21 IFM1 C6_01460C_A C6_01980C_A NAM2 C1_07630W_A TUF1	Candida albicans
42221	response to chemical	CDC39 PCL1 C4_06430C_A ATX1 PST1 PST2 C1_03990W_A MDR1 RTG3 C1_09220W_A C6_00850W_A CCT8 C6_00310W_A CIP1 C4_02150C_A PDI1 NAG3 FET34 C6_01870C_A C1_02760W_A SOD1 C2_03910C_A HPA2 TSC2 C1_07630W_A GRE2	Candida albicans
19725	cellular homeostasis	ATX1 C6_02180W_A MDR1 OCT1 C1_14560C_A NHX1 CR_03120W_A C6_00850W_A CYM1 C2_07010W_A FET3 CIP1 C4_02150C_A FET34 C6_01870C_A C2_06890C_A EMP70 SOD1 COX17 ATM1 C6_02560W_A OPT4 SPF1 GRE2	Candida albicans
16070	RNA metabolic process	VID27 CDC39 C4_06430C_A C1_05220C_A ALA1 C1_12280C_A EDC3 TIM9 ILS1 C6_04510C_A RPT6 RNY11 C4_01280C_A CR_03110W_A C1_10350C_A C6_02300C_A ALS5 C6_02880W_A CR_03190C_A C6_02310W_A HIT1 NAM2	Candida albicans
6629	lipid metabolic process	PCL1 BMT4 LIP3 PEX7 YOX1 C2_07240C_A CWH8 C6_01370W_A TLO13 C1_05980W_A FET3 EBP1 SEC12 INO1 C4_06440C_A COX15 TLO16 HET1 SPF1 C5_05040W_A	Candida albicans
30447	filamentous growth	VID27 FGR29 CDC39 PCL1 SNF4 EDC3 RNR1 CCT8 ASK1 ALS2 C1_05980W_A SEC9 C4_02150C_A FET34 EMP70 PIR32 SOD1 TSC2 PKH3	Candida albicans
16192	vesicle-mediated transport	C6_02180W_A SNF4 C1_03990W_A SEC27 UBP6 NHX1 RPT6 C6_03290W_A C6_01370W_A SEC9 C4_03810W_A CTA1 C1_02760W_A EMP70 BUD7 GDI1 C2_03800C_A PKH3 RPN2	Candida albicans
44419	biological process involved in interspecies interaction between organisms	PST1 HSP104 PST2 MDR1 RTG3 ALS2 RBT4 NAG3 FET34 ALS5 C6_00920W_A SOD1 HET1 SPF1 ALS6	Candida albicans
5975	carbohydrate metabolic process	BMT4 C5_04940W_A ADH2 HSP104 MNN41 RTG3 CRH11 PYC2 C2_03910C_A SCW4	Candida albicans
42254	ribosome biogenesis	C4_06430C_A C1_05220C_A C1_12280C_A TIM9 C4_01280C_A C1_10350C_A ALS5 MAM33 HIT1	Candida albicans
42710	biofilm formation	HSP104 PBR1 ALS2 ALS5 UGA33 SPF1 MRV8 ALS6	Candida albicans
7165	signal transduction	RTG3 C1_10140C_A C4_02150C_A C1_02760W_A RGS2 GDI1 C6_04470C_A PKH3	Candida albicans
6259	DNA metabolic process	RAD18 CDC13 C4_06150C_A RNR1 C1_02390W_A RPT6 SOD1 CCE1	Candida albicans
6091	generation of precursor metabolites and energy	AEP1 ADH2 RTG3 C2_07240C_A C6_00920W_A MAM33 C6_02560W_A	Candida albicans
6457	protein folding	HSP104 MIA40 CCT8 PDI1 C6_01460C_A YKE2	Candida albicans
7155	cell adhesion	PBR1 ALS2 ALS5 SPF1 PGA25 ALS6	Candida albicans
71555	cell wall organization	CRH11 HHF1 HHT21 PIR32 SOD1 SPF1	Candida albicans
45333	cellular respiration	AEP1 RTG3 C6_00920W_A MAM33	Candida albicans
7049	cell cycle	C4_06150C_A ASK1 C1_10350C_A HHT21	Candida albicans
70783	growth of unicellular organism as a thread of attached cells	CDC39 C1_05980W_A C4_02150C_A EMP70	Candida albicans
7010	cytoskeleton organization	PCL1 ASK1 ARC15	Candida albicans
7124	pseudohyphal growth	CDC39 C4_02150C_A EMP70	Candida albicans
30448	hyphal growth	ALS2 SEC9	Candida albicans
6766	vitamin metabolic process	C6_01750C_A SPE2	Candida albicans
6997	nucleus organization	C4_01300W_A	Candida albicans
42493	response to drug	MDR1	Candida albicans
910	cytokinesis	none
9405	pathogenesis	none
6464	cellular protein modification process	none
32196	transposition	none
7114	cell budding	none
746	conjugation	none
48468	cell development	none
other	other	C6_04080W_A C5_05440C_A ARO10 ADO1 BMT7 C5_04330W_A C6_03620C_A C2_10860C_A NIT2	Candida albicans
not_yet_annotated	not_yet_annotated	C6_04200C_A	Candida albicans

## Sheet: Intersection set GO enrichment
GOID	GO_term	Cluster frequency	Background frequency	Corrected P-value	False discovery rate	Gene(s) annotated to the term	Directly Annotated GOID List
70585	protein localization to mitochondrion	16 out of 252 genes, 6.3%	127 out of 6473 background genes, 2.0%	0.01585	0.02	MIA40:C1_07630W_A:TIM50:C2_00700W_A:COX17:TIM44:AFG3:OCT1:C6_00920W_A:NAM2:C6_04510C_A:C7_01600W_A:TOM40:TIM9:MAM33:CR_05970C_A	6627:43161:9060:6457:51131:44571:97428:44114:45039:32543:463:55085:6429:34551:45454:8033:65003:462:32979:34599:106035:6412:106034:50821:61668:15893:33615:30150:46902:6970:6508:6879:15680:45041:33617:6465:372
72655	establishment of protein localization to mitochondrion	16 out of 252 genes, 6.3%	127 out of 6473 background genes, 2.0%	0.01585	0.01	MIA40:C1_07630W_A:TIM50:C2_00700W_A:COX17:TIM44:AFG3:OCT1:C6_00920W_A:NAM2:C6_04510C_A:C7_01600W_A:TOM40:TIM9:MAM33:CR_05970C_A	6627:43161:9060:6457:51131:44571:97428:44114:45039:32543:463:55085:6429:34551:45454:8033:65003:462:32979:34599:106035:6412:106034:50821:61668:15893:33615:30150:46902:6970:6508:6879:15680:33617:45041:372:6465
6626	protein targeting to mitochondrion	15 out of 252 genes, 6.0%	121 out of 6473 background genes, 1.9%	0.03436	0.0333	MIA40:C1_07630W_A:TIM50:C2_00700W_A:COX17:TIM44:AFG3:OCT1:C6_00920W_A:NAM2:C6_04510C_A:C7_01600W_A:TOM40:TIM9:MAM33	6627:43161:9060:6457:44571:97428:44114:45039:32543:463:55085:6429:45454:8033:65003:462:32979:34599:106035:6412:106034:50821:61668:15893:33615:30150:46902:6970:6508:6879:15680:33617:45041:372:6465
